# Supplementary material for: Are debt-for-nature swaps scalable: Which nature, how much debt, and who pays?
Source: Ambio. 2023 Sep 2;53(1):63–78. doi: 10.1007/s13280-023-01914-4 (PMC10692041; doi:10.1007/s13280-023-01914-4)
Supplement: Supplementary file 2 — Supplementary file2 (XLSX 36 kb) [file 13280_2023_1914_MOESM2_ESM.xlsx]

## Sheet: Data
Notes: This dataset includes debt-related data (marked in orange) and biodiversity-related data (marked in green) that the article is based on. It includes data for 67 out of the 73 DSSI eligible countries.
1. This section shows the shares of public external debt owed to each creditor type for each country. "-"means the debtor country does not have public external debt to this type of creditors. The total share for each individual country is 100%.
2. For countries whose biggest creditors are "other bilateral" or "other multilateral", the second largest (and specific) creditor is selected.
3. The "Global Priority Share" section shows how much (in %) global priority areas (total and by biome types) each individual country holds within its territory. Cells coded in blue means that the share is above 1% but below 2%, and Cells coded in blue means that the share is above 2%.
4. This section shows how much (in %) of global priories (total and by biome type) are protected in each individual country.
DSSI Eligible Country	Total area (sqkm)	Total public External Debt in 2019		Composition of Total Public External Debt by Creditor Type (in %)1				Largest Creditor2			Global Priority share (Total and by Biome Type, in %)3						Protected priorities			Percent protected by Biome Type (in %)4
		Abosolute amount (USD millions)	As % of GDP	Official multilateral	Official bilateral	bondholders	Non-official bilateral	Largest creditor	Debt owed to largest creditor as % of GDP	Debt owed to largest creditor as % of total public external debt	All	Forest	Grass	Desert	Mangrove	Freshwater	Overall percent protected	Overall country priority cover %	Overall country priority unprotected	All	Forest	Grass	Desert	Mangrove	Freshwater
Afghanistan	8624	2220.53	0.115106	0.554617	0.445383	-	-	Russia	0.0440161	0.382395	0.0218667	0.00298156	0.0572675	0.128389		0.000871673	4.76679	1.34347	0.97878	2.12199	3.01205	3.20783	0.358809	0	7.40741
Angola	1.01627e+06	36429.7	0.410172	0.129251	0.454265	0.219601	0.196883	China	0.169427	0.413064	2.57683	1.78016	9.51976	0.986709	0.00807657	1.64646	6.62682	81.4654	0.951878	4.81219	1.04529	4.71948	11.4758	0	24.4377
Bangladesh	4154	42450.3	0.140299	0.673058	0.326504	-	0.000438583	World Bank-IDA	0.0521805	0.371924	0.0105327	0.00921411			2.32201	0.0968525	4.42656	2.99234	0.23351	76.649	84.4055	0	0	98.9565	82.2
Benin	77885	3877.84	0.269468	0.612302	0.113242	0.143524	0.130932	World Bank-IDA	0.0751726	0.278966	0.197483	0.0194251	0.744748		0.0928805	0.0653755	23.5149	67.0422	0.758015	24.1985	42.3717	24.3746	0	0	30.6173
Bhutan	25133	2624.57	1.03716	0.249374	0.741381	-	0.00924416	India	0.744069	0.717412	0.0637264	0.093313	0.0313942			0.0129782	27.1786	63.067	0.706402	29.3598	26.6445	50.8469	0	0	19.1542
Burkina Faso	22839	3652.09	0.228387	0.907008	0.0896698	-	0.00332221	World Bank-IDA	0.1046	0.457993	0.0579098	0.000107767	0.221935			0.0309928	15.1609	8.38644	0.741276	25.8724	66.6667	26.2177	0	0	47.7083
Burundi	852	578.085	0.191906	0.80899	0.19101	-	-	International Monetary Fund	0.0495084	0.257983	0.0021603	0.000538837	0.00605258			0.00206619	4.29695	3.13442	0.765258	23.4742	95	14.5367	0	0	12.5
Cabo Verde	339	1821.16	0.918923	0.491516	0.2301	-	0.278384	Portugal (Non-official)	0.254568	0.277028	0.000859557	0.000188593					3.34731	9.61641	0.961652	3.83481	7.14286	0	0	0	0
Cambodia	51147	7666.67	0.283014	0.289369	0.710631	-	-	China	0.133211	0.470686	0.129687	0.175665			0.0484594	0.230251	16.4476	28.1015	0.712183	28.7817	29.1608	0	0	66.6667	34.184
Cameroon	361210	11035.1	0.282898	0.410331	0.469949	0.0622162	0.057504	China	0.0884073	0.312506	0.915872	1.16785	1.45594		0.197876	0.537822	11.5843	77.7129	0.885155	11.4845	11.8797	11.3027	0	16.3265	26.3341
Central African Republic	586536	750.104	0.337838	0.59576	0.343068	-	0.0611715	International Monetary Fund	0.133533	0.395259	1.4872	1.76522	5.06854			0.639549	17.3046	94.8204	0.822807	17.7193	14.2759	16.3854	0	0	26.3655
Chad	61319	3544.98	0.313301	0.316516	0.249457	-	0.434027	UK (Non-official)	0.135716	0.43318	0.155478	0.00898959	0.591945	4.6067e-05		0.350025	11.7998	4.8212	0.670967	32.9033	21.5285	32.9206	0	0	29.3119
Comoros	964	243.321	0.208709	0.360426	0.639574	-	-	China	0.0666704	0.319442	0.00244429	0.00247416				0.000193705	9.68553	55.9093	0.910788	8.92116	7.25953	0	0	0	0
Congo, Dem. Rep.	2.05228e+06	5228.61	0.103741	0.62192	0.358534	-	0.0195455	World Bank-IDA	0.0255484	0.246271	5.20368	6.46877	9.4652		0.00403828	7.01509	12.2669	88.2012	0.87304	12.696	14.8095	9.51401	0	100	17.9381
Congo, Rep.	323362	5958.2	0.485694	0.176422	0.761001	0.0495175	0.0130598	China	0.305841	0.629698	0.819906	0.967454	0.945615			2.23161	31.0644	93.9887	0.675818	32.4182	41.9923	7.80352	0	0	74.8105
Côte d'Ivoire	116815	17013.5	0.290634	0.265636	0.198241	0.447265	0.0888575	China	0.0409386	0.14086	0.296192	0.096124	0.268673		0.274603	0.159839	21.8305	36.35	0.695227	30.4773	57.7335	12.1923	0	2.94118	23.5912
Djibouti	29	2176.99	0.645288	0.305642	0.692705	-	0.0016532	China	0.359579	0.557239	7.35314e-05			0.00147414			0	0.135295	1	0	0	0	0	0	0
Dominica	462	271.424	0.466041	0.526249	0.223506	0.165648	0.084598	Bondholders	0.077199	0.165649	0.00117143	0.00114503		0.00377749		0.000129137	21.9617	60.3947	0.757576	24.2424	23.9216	0	6.09756	0	25
Ethiopia	388506	27808.1	0.289932	0.449464	0.305233	0.0359607	0.209342	World Bank-IDA	0.0975299	0.336389	0.985083	0.332862	2.94658	1.22303		0.366006	14.7298	34.4564	0.810682	18.9318	27.8339	12.1468	37.3837	0	43.6712
Fiji	15536	793.718	0.144411	0.448199	0.299822	0.251979	-	China	0.0367207	0.254279	0.0393926	0.0068073				0.0437773	5.23326	80.4193	0.984938	1.50618	2.11082	0	0	0	3.83481
Gambia, The	1579	693.881	0.379985	0.761367	0.238633	-	-	World Bank-IDA	0.0644366	0.169577	0.00400366		0.0123469		0.0323063	0.0169815	5.63664	14.7355	0.957568	4.24319	0	5.55991	0	12.5	3.9924
Ghana	46493	22067.1	0.32944	0.319807	0.14613	0.364705	0.169359	Bondholders	0.120148	0.364705	0.117886	0.0434212	0.165779		0.0363445	0.0661503	15.1122	19.4505	0.705762	29.4238	74.9948	14.6098	0	33.3333	12.4451
Grenada	59	536.574	0.443228	0.576334	0.235287	0.185166	0.00321298	World Bank-IDA	0.101415	0.228809	0.000149598	0.000202064		0.000184268		6.45683e-05	12.0927	14.2694	0.610169	38.9831	46.6667	0	75	0	50
Guinea	151220	2658.45	0.216193	0.539012	0.437161	-	0.0238267	China	0.0518098	0.239647	0.383428	0.271354	1.18995		0.54113	0.211106	22.606	61.7066	0.768113	23.1887	17.7525	25.1314	0	32.8358	23.9945
Guinea-Bissau	11648	557.274	0.416047	0.554753	0.218756	0.22649	-	Bondholders	0.0942305	0.22649	0.0295343	0.0240815	0.0833439		0.698623	0.0914611	26.006	34.2901	0.579413	42.0587	54.1488	44.1415	0	58.3815	43.0639
Guyana	189867	1371.44	0.265076	0.682291	0.294327	-	0.0233615	Inter-American Dev. Bank	0.105567	0.398252	0.48142	0.814604	0.0381042		0.310948	0.747282	8.67287	90.121	0.906519	9.34812	9.54447	1.19259	0	45.4545	9.93217
Haiti	2523	2197.54	0.153329	0.128257	0.851637	-	0.0201066	Venezuela	0.128338	0.837007	0.00639723	0.000211044			0.0444211	0.00539146	2.17184	9.256	0.997226	0.277447	2.12766	0	0	0	0
Honduras	60903	7947.25	0.316682	0.595857	0.132849	0.213911	0.0573835	Inter-American Dev. Bank	0.0926851	0.292676	0.154424	0.190155	0.0476182		0.698623	0.225021	23.4497	54.1791	0.632136	36.7864	46.2596	27.8579	0	76.3006	42.8838
Kenya	48661	30788.8	0.322385	0.436386	0.332969	0.198124	0.0325211	China	0.0784629	0.243383	0.123383	0.039609	0.241726		0.11711	0.0269896	15.3168	8.36266	0.684696	31.5304	58.6668	22.6551	0	44.8276	19.378
Kyrgyz Republic	10422	3977.19	0.470416	0.432858	0.567142	-	-	China	0.210359	0.447177	0.0264257	0.000610681	0.0970831	0.00184268		0.000871673	6.44237	5.22184	0.979562	2.04375	2.20588	1.88228	0	0	33.3333
Lao PDR	110650	10398.8	0.572186	0.170274	0.643733	0.16072	0.0252737	China	0.284593	0.497378	0.28056	0.380957				0.0800647	11.9071	48.125	0.848269	15.1731	17.2937	0	0	0	19.1532
Lesotho	4775	935.508	0.393678	0.856144	0.140732	-	0.00312344	World Bank-IDA	0.152688	0.38785	0.0121073	0.00617866	0.0465353			0.000742536	20.721	15.6357	0.877277	12.2723	12.3547	12.6532	0	0	13.0435
Liberia	224	1308.85	0.426264	0.842471	0.157529	-	-	World Bank-IDA	0.148163	0.347584	0.000567967			0.0093516			0.035361	0.0138476	1	0	0	0	0	0	0
Madagascar	221088	3665.21	0.259674	0.828451	0.129653	-	0.041895	World Bank-IDA	0.119478	0.460106	0.560583	0.523682	0.0069131	1.91302	1.63147	0.392866	9.24038	37.2833	0.825395	17.4605	25.2733	10.3497	21.911	20.297	14.9478
Malawi	46527	2365.61	0.308556	0.819956	0.180044	-	-	World Bank-IDA	0.126428	0.409742	0.117972	0.0565015	0.447708			0.0916548	15.9807	39.2552	0.806306	19.3694	37.1612	19.5573	0	0	17.9641
Maldives	0	2238.93	0.39682	0.176217	0.474499	0.156325	0.192959	China	0.150881	0.380226							0.710969	0	1		0	0	0	0	0
Mali	74140	5082.26	0.294119	0.783891	0.216068	-	-	World Bank-IDA	0.113987	0.387553	0.187987	0.00242925	0.716148			0.0848105	6.81863	5.92043	0.908376	9.1624	38.6322	9.21303	0	0	24.7431
Mauritania	46	4286.92	0.56402	0.6119	0.3881	-	-	Saudi Arabia	0.0803662	0.142488	0.000116636		0.000425421			0.000645683	0.558228	0.00442962	0.695652	30.4348	0	34.0909	0	0	65
Moldova	7828	1921.59	0.160551	0.876065	0.111409	-	0.0125261	World Bank-IDA	0.0515321	0.320969	0.0198484	0.00216882	0.0147254			0.00135594	0.175106	23.2328	1	0	0	0	0	0	0
Mongolia	161565	8432.04	0.60243	0.282326	0.289442	0.403224	0.0250071	Bondholders	0.242914	0.403224	0.409659	0.134516	1.12495	0.588276		0.0188862	14.8088	10.3371	0.795346	20.4654	33.9887	16.1917	7.76038	0	49.2308
Mozambique	456483	11101	0.725964	0.431434	0.437668	0.0617032	0.069195	World Bank-IDA	0.198751	0.273776	1.15744	0.627085	3.70747		1.08226	0.509767	13.5965	58.0453	0.861263	13.8737	20.8753	13.9866	0	54.8507	44.3255
Myanmar	282084	11020.5	0.144843	0.219705	0.754433	-	0.0258619	China	0.0421889	0.291273	0.715243	0.956686	0.0435283		0.791503	0.444876	4.35074	42.2179	0.939461	6.05387	7.45532	25.7663	0	0	5.63135
Nepal	23716	5992.24	0.19556	0.872424	0.127568	-	-	World Bank-IDA	0.0939003	0.48016	0.0601335	0.0427522	0.083924			0.020791	17.4199	16.1115	0.747512	25.2488	25.1969	34.8387	0	0	41.3043
Nicaragua	35693	5594.77	0.446834	0.785748	0.209651	-	0.00460073	Inter-American Dev. Bank	0.166804	0.373303	0.090502	0.132644	0.0315005		0.464403	0.177014	37.6208	27.8462	0.349228	65.0772	66.6317	19.8588	0	64.3478	56.2283
Niger	1201	3512.87	0.272069	0.797595	0.202405	-	-	World Bank-IDA	0.104307	0.383387	0.00304521		0.011351	0.00124381		0.0232123	15.9602	0.101607	0.630308	36.9692	0	37.3083	40.7407	0	0.417246
Nigeria	125709	29847.9	0.0666068	0.496961	0.128864	0.374176	-	Bondholders	0.0249227	0.374176	0.318743	0.102806	1.04946		0.197876	0.217272	13.123	13.8352	0.71578	28.422	48.242	25.8149	0	0	57.6523
Pakistan	21007	79210	0.284701	0.482739	0.404653	0.0669108	0.0456969	China	0.0727303	0.255462	0.0532646	0.00458011	0.14561	0.237752	0.0242297	0.00681196	10.3043	2.39653	0.961632	3.83682	0.784314	4.57503	1.66634	33.3333	4.73934
Papua New Guinea	405261	4482.51	0.180534	0.452162	0.290734	0.111545	0.145559	Asian Dev. Bank	0.0547215	0.303109	1.02757	1.25513	0.227765		7.40621	2.20113	2.927	87.4262	0.97113	2.88703	1.97482	26.0984	0	4.41658	4.08331
Rwanda	5366	4213.53	0.406931	0.774466	0.11539	0.0999122	0.0102313	World Bank-IDA	0.18324	0.450298	0.0136058	0.00571616	0.0221702			0.0180146	8.91289	21.3416	0.723258	27.6742	74.3912	22.8958	0	0	38.5305
Samoa	0	408.555	0.479384	0.555027	0.444973	-	-	China	0.174763	0.364558							3.43246	0	1		0	0	0	0	0
Sao Tome and Principe	657	244.045	0.582951	0.266348	0.692676	-	0.040976	Portugal	0.133765	0.229462	0.00166587	0.00251457				9.68525e-05	21.8983	57.3195	0.745814	25.4186	27.5	0	0	0	0
Senegal	33580	13060.6	0.553929	0.38011	0.221779	0.315588	0.0825233	Bondholders	0.174814	0.315588	0.0851443	0.00849566	0.319153		0.286718	0.0807427	25.5349	17.1273	0.691543	30.8457	52.7484	30.1342	0	80.2817	45.102
Sierra Leone	52720	1621.63	0.393434	0.777093	0.103619	-	0.119287	International Monetary Fund	0.122015	0.310129	0.133675	0.0807132	0.149284		0.464403	0.233479	5.58914	72.7196	0.930102	6.98976	12.5619	9.33938	0	0	2.37832
Solomon Islands	24088	113.05	0.0711045	0.934666	0.0653339	-	-	Asian Dev. Bank	0.0300576	0.422724	0.0610767	0.0875115			1.64358	0.0379662	2.16648	85.4109	0.986632	1.33677	0.944122	0	0	5.65111	3.31633
Somalia	24326	2300.79	0.490545	0.405436	0.58545	-	0.00911427	Russian	0.0890696	0.181573	0.0616802	0.0058374	0.0615314	0.113786		0.0186925	0.00282892	3.82313	0.999507	0.0493299	0.307692	0	0	0	0
St. Lucia	173	563.994	0.265728	0.433512	0.0850364	0.481452	-	Bondholders	0.127935	0.481452	0.000438653	0.000368205		0.000138201			18.8477	27.1721	0.601156	39.8844	48.7805	0	0	0	0
St. Vincent and the Grenadines	147	356.601	0.432391	0.817536	0.160311	0.0221536	-	World Bank-IDA	0.0828574	0.191626	0.000372728	0.000408618		9.2134e-05			8.70184	37.6227	0.843537	15.6463	15.3846	0	0	0	0
Tajikistan	1767	2974.28	0.366443	0.397569	0.426769	0.168108	0.00755409	China	0.138324	0.377477	0.00448034		0.0175003			0.000807104	18.6632	1.24098	0.86644	13.356	0	12.5414	0	0	4
Tanzania	351696	14401.2	0.22795	0.723628	0.168389	-	0.107983	World Bank-IDA	0.116196	0.509742	0.891748	0.233604	3.02158		0.613819	0.468088	26.8213	37.3592	0.638333	36.1667	41.0964	37.113	0	84.8684	55.5418
Timor-Leste	254	201.904	0.100055	0.876678	0.123322	-	-	Asian Dev. Bank	0.0610256	0.609919	0.000644034	0.000193083			0.0161531	0.0018402	14.2781	1.73191	0.677165	32.2835	34.8837	0	0	25	38.5965
Togo	21007	1880.3	0.342478	0.517242	0.420847	-	0.0619114	China	0.126918	0.370588	0.0532646	0.00927248	0.176801			0.0154964	10.2753	36.7722	0.892702	10.7298	26.5375	10.6366	0	0	8.33333
Tonga	351	186.484	0.363978	0.455052	0.544948	-	-	China	0.198349	0.544948	0.000889984						9.79162	45.2218	0.903134	9.68661	0	0	0	0	0
Uganda	107302	8876.97	0.252437	0.663826	0.326785	-	0.00938901	World Bank-IDA	0.0978969	0.387808	0.272071	0.0323886	0.887129			0.201195	14.9513	44.3276	0.78992	21.008	62.4567	17.934	0	0	19.5122
Uzbekistan	1522	11789.8	0.203548	0.60989	0.371097	-	0.0190126	Asian Dev. Bank	0.0669383	0.328857	0.00385913	8.98061e-06	0.00199175	0.0626972		0.000839388	1.40342	0.34078	0.996715	0.328515	0	3.39806	0	0	0
Vanuatu	9571	378.513	0.405156	0.454969	0.545031	-	-	China	0.139975	0.345484	0.0242679	0.0346741			0.214029	0.00445522	3.72507	75.3756	0.955177	4.48229	4.8951	0	0	0	1.44928
Yemen, Rep.	1634	6628.32	0.293534	0.5	0.5	-	-	World Bank-IDA	0.066634	0.227006	0.00414311		0.00116991	0.0707589		0.000129137	0.668596	0.385493	0.893513	10.6487	0	0	11.9141	0	0
Zambia	550202	11770.4	0.504956	0.236505	0.304469	0.254876	0.20415	Bondholders	0.128701	0.254876	1.39507	0.700344	5.11791			1.39232	37.5726	73.1747	0.603309	39.6691	36.2638	40.0871	0	0	43.511
