# Supplementary material for: Are debt-for-nature swaps scalable: Which nature, how much debt, and who pays?
Source: Ambio. 2023 Sep 2;53(1):63–78. doi: 10.1007/s13280-023-01914-4 (PMC10692041; doi:10.1007/s13280-023-01914-4)
Supplement: Supplementary file 3 — Supplementary file3 (XLSX 78 kb) [file 13280_2023_1914_MOESM3_ESM.xlsx]

## Sheet: NDVI
NAME	amp_bs1	amp_OA1	amp_bs2	amp_OA2	rep_bs1	rep_OA1	rep_bs2	rep_OA2	mam_bs1	mam_OA1	mam_bs2	mam_OA2	bird_bs1	bird_OA1	bird_bs2	bird_OA2	od_bs1	od_OA1	od_bs2	od_OA2		overall	BS	OA
Afghanistan									0				0				0		0	0		0	0	0
Åland Islands
Albania	62.3482		62.3482						63.5104		81.3953		30.621									60.0446		60.0446
Algeria									12.5302				47.7187									30.1244		30.1244
American Samoa
Andorra											0											0		0
Angola	85.293		85.293		67.18	91.5791	25		96.3903	99.0412			89.659	93.807			92.3647	93.807	97.4412	97.4412		85.7151	95.1351	79.8276
Anguilla
Antigua and Barbuda
Argentina	66.1893		66.1893		92.1397	95.3798	91.3793		87.9652	97.5492			87.3306	91.9186	86.7261		87.7633	91.9186	86.5243	86.5243		86.8212	92.6581	83.5786
Armenia					44.1704				29.106		8.5693		8.60606									22.6129		22.6129
Aruba
Australia	90.3386		90.3386		42.6872	46.4984	33.0356	100	92.0898		89.3417		48.7265	93.4776	61.9982		43.9555	93.4776				71.2281	83.3634	65.8346
Austria									70.3857		44.8598											57.6228		57.6228
Azerbaijan					58.9971				38.848		2.22222		1.14943		0							20.2433		20.2433
Bahamas
Bangladesh						0							92.9293	75.3731				75.3731				60.9189	50.2488	92.9293
Barbados
Belarus									82.2041													82.2041		82.2041
Belgium									79.2112													79.2112		79.2112
Belize					94.4392	96.7004			89.0652	96.541			93.6188	92.4602				92.4602				93.6121	94.5405	92.3744
Benin					96.9831	94.5983			77.2182	98.9748	95.5521		67.1424	72.4505			94.9471	72.4505				85.5908	84.6185	86.3686
Bhutan					90.6166	100	86.4747		90.7059	94.5098	90.1252		90.9999	91.2213	90.1567		90.9454	91.2213	90.4632	90.4632		91.3772	93.4831	90.0609
Bolivia	93.7718	95.3585	93.7718		95.8113	93.2908	95.9071	95.744	93.4245	93.695	95.5212	95.0738	92.7104	92.5803	96.889	95.9198		92.5803				94.5031	94.2803	94.7259
Bosnia and Herzegovina	100		100						82.6821		50		83.8835									83.3131		83.3131
Botswana	84.0187		84.0187		95.5288	50			45.9162	47.088			44.6792	42.0669	37.9679		74.8622	42.0669	97.939	97.939		64.9301	55.8322	70.6163
Brazil	96.0421	96.6781	96.0421	99.3141	79.0325	81.8188	97.0454	96.7251	87.6525	88.8759	96.5087	96.6549	94.4954	94.7719	96.4034	96.1428		94.7719				93.4692	93.9726	92.9028
British Indian Ocean Territory
British Virgin Islands
Brunei Darussalam					79.1667	69.4581	86.7257	84.6154	83.6957	72.8814	89.2157		85.7143	71.7593				71.7593				79.4991	74.0947	84.9036
Bulgaria	0		0		95.2				83.9712		87.841		0									44.502		44.502
Burkina Faso									31.3788				16.1336	23.8865			58.6614	23.8865				30.7894	23.8865	35.3913
Burma	90.3226		90.3226		93.254	89.3339	91.5688		93.7758	89.886	92.3183		93.5914	90.2504	92.633	86.9583	95.2567	90.2504	92.4913	92.4913		91.544	89.8617	92.5534
Burundi					83.5498	65.5303			65.4596	44.2931	54.4379	75	59.1378	68.2186	79.9197	70.5696	62.7837	68.2186				66.4266	65.305	67.5481
Cambodia	99.0205		99.0205		84.9534	82.4006			86.1806	94.5364			88.3874	87.9331			71.5207	87.9331				88.1886	88.2008	88.1805
Cameroon	94.3815	91.9257	94.3815		97.4177	97.3069	93.6816	88.9111	93.0168	96.3038	97.0401	96.8886	90.9269	89.0248			98.5568	89.0248	94.3046	94.3046		93.9646	92.9613	94.8564
Canada	83.6752		83.6752						59.6069		64.2987		63.8908		75.2483							71.7325		71.7325
Cape Verde
Cayman Islands
Central African Republic					99.7478	99.5977	99.6599	99.5035	99.5032	99.4369	99.2772		99.3893	99.2866			99.1903	99.2866	75	75		95.683	95.3519	95.9668
Chad					90.9923	96.8854			71.5869				20.1238	32.1408				32.1408				57.3117	53.7223	60.901
Chile
China	82.6662		82.6662		84.2601	79.2065	84.09		78.1552	84.0542	85.2773		77.3777	80.7351	91.5548	85.9981	69.079	80.7351	54.8387	54.8387		78.4708	77.5946	78.9965
Christmas Island
Colombia	99.075	99.0334	99.075	98.2918	94.4055	93.2511	99.4862	99.4592	83.7744	92.2479	98.1753	98.3136	96.1918	95.7876	98.3098	97.9616		95.7876				96.3898	96.6815	96.0616
Comoros
Congo					98.1474	97.9028			98.4328	99.2629			98.1494	98.2498			97.9506	98.2498	93.719	93.719		97.3783	97.4768	97.2799
Costa Rica	86.2069	85.7143	86.2069		90.7388	81.5253			90.7647	84.2918			85.884	77.0269				77.0269				84.5386	81.117	87.9603
Cote d'Ivoire					93.4084	88.3188			91.5741	88.5621	88.5725	66.6667	91.7626	88.6858			89.22	88.6858	93.0314	93.0314		88.46	85.6584	91.2615
Croatia	69.3252		69.3252						77.0619		89.2517		78.6618									76.7251		76.7251
Cuba
Cyprus
Czech Republic									75.2561		68											71.6281		71.6281
Democratic Republic of the Congo	93.0457		93.0457		98.0224	97.2034	96.1014	93.0256	97.5146	96.2979	97.7502	93.3583	97.9231	98.2267	95.2184	93.0734	97.8229	98.2267	97.4187	97.4187		96.1497	95.8538	96.3863
Denmark
Djibouti					0																	0		0
Dominica
Dominican Republic
Ecuador	97.6409	95.8266	97.6409	96.7528	92.4268	89.5169	98	96.0251	85.7869	83.9806	97.3289	95.9561	89.1734	86.3293	96.7248	94.7535		86.3293				92.9525	91.7189	94.3403
Egypt													27.7778									27.7778		27.7778
El Salvador	60.6557		60.6557		35.4592				56.2908	49.1935	42.1053		59.6154									51.9965	49.1935	52.4637
Equatorial Guinea	96.8531	96.1198	96.8531		97.153	95.4942			96.2938	95.3488			96.3268	95.3813			96.471	95.3813	89.0842	89.0842		95.065	94.4683	95.5764
Eritrea					24.4318								16.8117	20.7322				20.7322				20.677	20.7322	20.6217
Estonia									77.5887		0				0		0					19.3972		19.3972
Ethiopia					57.475				81.8928	57.3954	0		77.292	78.8814	68.7717	50	57.2139	78.8814				60.7804	66.2896	57.1076
Falkland Islands (Malvinas)
Faroe Islands
Fiji
Finland									81.5932		75.5926		80.4814		85.5413		80.4606		84.4852	84.4852		81.8056	84.4852	81.359
France	88.7948		88.7948						71.4648		76.4872		80.8743									81.2832		81.2832
French Guiana	98.5604	98.5155	98.5604		96.9277	96.7112	99.6972	99.4572	31.0345	34.058	98.4927	98.3023	99.8665	99.5585	97.9196	97.6705		99.5585				90.3057	90.4789	90.1324
French Southern and Antarctic Lands
Gabon	89.6674	90.5623	89.6674		94.7588	93.8578			95.5557	93.959	88.4065		93.3386	92.8724			94.3341	92.8724	94.4074	94.4074		92.762	93.0886	92.517
Gambia					73.0769				28.1934				30.7128	32.7167				32.7167				39.4833	32.7167	43.9944
Georgia					89.4089				71.7507		91.6315		82.3344									83.7814		83.7814
Germany									73.3776													73.3776		73.3776
Ghana					79.9888	75.9594			58.7772	71.2832	63.3286		66.1865	61.9047			57.0607	61.9047	77.765	77.765		68.3567	69.7634	67.1845
Gibraltar
Greece	80.1755		80.1755		94.1995				81.3905		93.6893		74.4968									84.0212		84.0212
Greenland
Grenada
Guadeloupe
Guam
Guatemala	82.9346		82.9346		89.9303	84.487	96.1538		86.6106	88.2048	87.1976		94.4296	92.4468	83.105			92.4468				88.4068	89.3964	87.912
Guinea					97.7257	92.7462			95.42	94.7009	94.7456	84.8485	95.0098	92.8431			95.0373	92.8431	93.2057	93.2057		93.5276	91.8646	95.1907
Guinea-Bissau					79.8582				86.7053	100			65.5682	78.5379				78.5379				81.5346	85.692	77.3772
Guyana	96.0232	99.6993	96.0232		98.0712	97.3144	97.4211	97.066	26.7857	41.0959	97.4876	97.1442	99.0932	99.0698	96.762	96.2665		99.0698				89.6496	90.8408	88.4584
Haiti
Heard Island and McDonald Islands
Honduras	91.2302		91.2302		90.6026	87.4536			88.5403	91.569	89.9129		93.0073	93.3161	87.2881			93.3161				90.6788	91.4137	90.2588
Hong Kong
Hungary											80.0885											80.0885		80.0885
Iceland
India	89.6339		89.6339		75.6207	74.9177	93.1379		86.8442	85.4849	86.2389		73.8582	83.7089	90.992	82.8431	85.7056	83.7089	88.126	88.126		84.9113	83.1316	85.9791
Indonesia	88.9121		88.9121		95.4375	90.9135	93.6786	95.3506	94.9591	91.771	88.8685		89.0787	85.8798	83.7209		54.0541	85.8798	89.582	89.582		87.9113	89.8961	86.7204
Iran (Islamic Republic of)					6.62761		0		4.13067		0		2.11389									2.57443		2.57443
Iraq					3.44333																	3.44333		3.44333
Ireland
Isle of Man
Israel					0				0				0									0		0
Italy	78.4047		78.4047						54.5507		80.9524		100									78.4625		78.4625
Jamaica
Japan	80		80																			80		80
Jersey
Jordan					0				0								0					0		0
Kazakhstan									33.0768				28.4189		63.1868		36.2694					40.238		40.238
Kenya					38.8905	49.0255			8.54853	21.0335	47.7545	67.4389	27.3919	23.0687	64.5767	63.7312	58.0071	23.0687				41.0446	41.2277	40.8615
Kiribati
Korea, Democratic People's Republic of									86.1492													86.1492		86.1492
Korea, Republic of
Kuwait
Kyrgyzstan									21.9163				21.2573		6.89655							16.69		16.69
Lao People's Democratic Republic	88.9916		88.9916		92.6342	89.8866			93.0187	88.8778	97.4649		92.7258	88.5686	94.4554	89.439	91.0568	88.5686				91.1292	89.0681	92.4174
Latvia									85.4644													85.4644		85.4644
Lebanon									0.215054													0.215054		0.215054
Lesotho
Liberia					97.8837	96.6127			98.2927	96.4458	97.2461	79.3814	97.0538	95.7704			96.8519	95.7704	97.3567	97.3567		95.5019	93.5563	97.4475
Libyan Arab Jamahiriya
Liechtenstein									75													75		75
Lithuania									78.5783													78.5783		78.5783
Luxembourg									71.0526													71.0526		71.0526
Madagascar	95.5487	92.8559	95.5487		91.0756		100															95.0058	92.8559	95.5433
Malawi	62.0785		62.0785		57.2579				65.7604	64.6735	81.8459		81.7184	82.0488	45.1523	95.4364	79.8139	82.0488				71.6595	81.0519	66.9633
Malaysia	98.2143	88.172	98.2143		91.4083	83.2892	96.549	93.9705	95.7246	93.0721	95.5683	93.9414	94.356	91.4173			94.8619	91.4173				93.3451	90.7543	95.6121
Mali									88.8863				29.9074	43.4814			100	43.4814				61.1513	43.4814	72.9312
Malta
Marshall Islands
Martinique
Mauritania
Mauritius
Mayotte
Mexico	88.8229		88.8229		54.5536	72.0297			83.4696	87.8701	89.938		86.2956	90.23	90.0325			90.23				83.845	85.0899	83.1336
Monaco
Mongolia					86.1298				41.8022		77.5437		43.7616		75.2129							64.8901		64.8901
Montenegro	56.7919		56.7919						83.5724				48.7603									61.4791		61.4791
Monserrat
Morocco									1.33915				4.49954									2.91935		2.91935
Mozambique	92.9026		92.9026		87.1034	90.6838			75.4261	90.0321	89.8637		85.553	83.6809	51.7241		87.498	83.6809				84.2543	87.0194	82.8717
Namibia	54.3827		54.3827		31.6344		48.2919		55.9459	89.3805			65.0276	53.0307	59.36		60.9243	53.0307				56.8538	65.1473	53.7437
Nepal	54.6296		54.6296		76.168		62.963		76.5744	83.3333	76.457		83.0047	81.1051	78.1877		75.2769	81.1051	78.1765	78.1765		74.2705	80.93	71.6067
Netherlands
Netherlands Antilles
New Caledonia
New Zealand
Nicaragua	100		100		92.3199	98.1308			87.234	92.4096	67.1123		96.0691	93.5223				93.5223				92.032	94.3963	90.4559
Niger									23.5226				16.2604	8.65331				8.65331				14.2724	8.65331	19.8915
Nigeria	0		0		84.3917	88.4825	96.2995	98.8255	59.0009	92.0199			48.1564	48.8265			84.4527	48.8265	88.5064	88.5064		66.1639	77.5812	57.6009
Niue
Norfolk Island
Northern Mariana Islands
Norway					37.6856				49.8788				51.0966		67.8218		36.186		43.3495	43.3495		47.0525	43.3495	47.6697
Oman					0												0		0	0		0	0	0
Pakistan					0.462535				16.7939				24.186									13.8142		13.8142
Palau
Palestine					0				0				0									0		0
Panama	80	100	80		92.3119	89.5597	93.2203		90.887	88.1729	92.2914	100	92.2481	89.3651				89.3651				90.5709	92.7438	88.7084
Papua New Guinea
Paraguay	86.7359		86.7359		97.2937	95.1009			97.5618	91.6256			90.5596	93.3298		100		93.3298				93.2273	94.6772	91.7774
Peru	99.1088	98.6697	99.1088	97.8677	96.8	95.6175	98.7036	98.1551	93.8196	91.9936	98.5024	97.9957	96.5092	94.6593	98.6094	98.0878		94.6593				96.9922	96.4118	97.6452
Philippines					91.4292	86.0008							78.4141									85.2813	86.0008	84.9216
Pitcairn Islands
Poland									72.1104													72.1104		72.1104
Portugal	84.8392		84.8392						83.0653				85.7143									84.6145		84.6145
Puerto Rico
Qatar
Republic of Moldova									65.6778		75.1111		93.578									78.1223		78.1223
Reunion
Romania									85.4835		82.1564		84.432									84.024		84.024
Russia	83.0747		83.0747		69.0688		84.8258		70.7034		77.4908		68.9352		70.3883		86.9664		89.3049	89.3049		79.3762	89.3049	78.3833
Rwanda					86.0951	77.2375			72.9807	60.8783	82.0971	84.4685	72.8732	74.1094	85.1597	79.3824	80.4695	74.1094	100	100		80.7044	78.598	82.8108
Saint Helena
Saint Kitts and Nevis
Saint Lucia
Saint Martin
Saint Pierre and Miquelon
Saint Vincent and the Grenadines
Samoa
Sao Tome and Principe
Saudi Arabia
Senegal					56.5015				75.4076				50.5512	53.8891				53.8891				58.0477	53.8891	60.8201
Serbia	50		50						84.6783		86.8852											67.8909		67.8909
Seychelles
Sierra Leone					90.6931	87.3656			94.3755	94.009	98.4167		93.8496	91.6836			94.4368	91.6836	85.3772	85.3772		91.5698	90.0238	92.8582
Singapore					0	0																0	0	0
Slovakia									86.5442		83.5101											85.0271		85.0271
Slovenia	72.1622		72.1622						86.7322		87.4433		73.2143									78.3428		78.3428
Solomon Islands
Somalia					2.82569				77.7778				13.7837	21.134				21.134				27.331	21.134	31.4624
South Africa	20.0739		20.0739		27.2599	44.1809	82.7103		48.0589	39.275	25.5885		40.3352	48.0857	38.9111		39.6151	48.0857	31.9663	31.9663		39.0791	42.3187	37.4593
South Georgia South Sandwich Islands
Spain	82.8444		82.8444						72.6809		77.4003		79.9421									79.1424		79.1424
Sri Lanka													33.0579									33.0579		33.0579
Sudan					94.9749	97.4805			77.0214	80.0454	93.9754	100	71.1896	74.2816	94.2379	95.5003	100	74.2816				87.7491	86.9316	88.5665
Suriname	97.9994	97.9585	97.9994		96.3767	93.842	98.1191	97.963	33.3333	43.9024	97.8935	97.6235	99.9341	99.882	95.9176	95.8084		99.882				90.2772	90.8577	89.6966
Svalbard
Swaziland					87.7824	89.6361			82.4959	81.8399			83.5451	82.9476				82.9476				84.4564	84.3428	84.6078
Sweden					29.184				84.5008				90.0939				57.6162					65.3487		65.3487
Switzerland									35.5502		42.0561											38.8031		38.8031
Syrian Arab Republic					0				8.04369								3.25645					3.76671		3.76671
Taiwan
Tajikistan									4.66845				3.1856				0					2.61802		2.61802
Thailand	92.0103		92.0103		92.8085	88.3263	88.7667	85.6907	92.2156	88.6163	85.0115		92.1853	88.8516	92.9656	89.0132	92.3726	88.8516	82.9454	82.9454		89.1522	87.4707	90.3292
The former Yugoslav Republic of Macedonia	17.3846		17.3846						25.4032		78.8679		21.8992									32.1879		32.1879
Timor-Leste
Togo					96.2638	93.3772			67.5926	95.6053	92.713		65.8752	72.8632			88.7962	72.8632	91.8318	91.8318		84.5103	85.3081	83.8454
Tonga
Trinidad and Tobago													21.875	8.77193				8.77193				13.1396	8.77193	21.875
Tunisia									0.613497				14.6933									7.6534		7.6534
Turkey	90.5312		90.5312		12.3779				55.2131				29.9451									55.7197		55.7197
Turkmenistan
Turks and Caicos Islands
Tuvalu
Uganda					95.5338	90.573	97.3118		91.059	68.8364	87.748	69.8025	87.2933	88.6509	92.5792	92.9566	89.6298	88.6509	90.4445	90.4445		88.1009	84.2735	91.4499
Ukraine									69.0202		63.0872		74.3225									68.81		68.81
United Arab Emirates					0												0		0	0		0	0	0
United Kingdom
United Republic of Tanzania	53.5131	100	53.5131		89.0525	89.2158			92.4122	73.3079	79.2815	54.5104	82.8577	84.5548	48.0342	52.8583	82.0057	84.5548	83.8405	83.8405		75.7266	77.8553	73.8345
United States	83.2256		83.2256		79.4865		95.4946		62.482		41.6816		56.9529		86.8159							73.6706		73.6706
United States Minor Outlying Islands
United States Virgin Islands
Uruguay	0		0		25		37.5		22.7273				0		31.25		0		29.4118	29.4118		17.5301	29.4118	16.2099
Uzbekistan									57.1429				2.6102									29.8765		29.8765
Vanuatu
Venezuela	97.3736	99.8198	97.3736		89.9095	89.5473	98.3272	98.3012	82.8264	81.1313	92.8696	95.7499	86.092	86.1751	97.0915	96.951		86.1751				92.2321	91.7313	92.7329
Viet Nam	86.5887		86.5887		85.6948	78.5208	100	57.1429	88.0912	83.6669	98.1861		86.4255	80.6942	89.1414	90.955	71.4165	80.6942				84.2538	78.6123	88.0148
Western Sahara
Yemen					0
Zambia	64.1151		64.1151		94.5907	96.4286			75.8011	92.8811	95.1959		90.5302	90.9286	81.0356	100	89.8266	90.9286	91.1159	91.1159		87.2406	93.7138	82.9251
Zimbabwe	96.8575		96.8575		65.8998	61.5296			58.3045	62.6167	61.7115		61.0914	62.6172	100		63.0476	62.6172				71.0959	62.3452	75.4712
OVERALL	93.3678	96.8552	93.3678	98.7237	73.6261	80.5853	80.3956	96.9461	74.6053	88.4326	90.2162	96.4776	75.6183	87.2666	86.2859	95.624	88.5717	87.2666	92.1106	92.1106		88.4227	92.0288	84.8165

## Sheet: LAI
NAME	amp_bs1	amp_OA1	amp_bs2	amp_OA2	rep_bs1	rep_OA1	rep_bs2	rep_OA2	mam_bs1	mam_OA1	mam_bs2	mam_OA2	bird_bs1	bird_OA1	bird_bs2	bird_OA2	od_bs1	od_OA1	od_bs2	od_OA2		overall	BS	OA
Afghanistan									0.515464				3.71257				0		0	0		0.845608	0	1.05701
Åland Islands
Albania	51.8219		51.8219						48.1139		9.30233		34.2612									39.0642		39.0642
Algeria									15.548				38.1433									26.8457		26.8457
American Samoa
Andorra											0											0		0
Angola	22.8409		22.8409		57.2569	81.3289	0		63.8278	66.8044			45.2445	49.4404			64.8458	49.4404	12.6153	12.6153		42.2386	51.9259	36.184
Anguilla
Antigua and Barbuda
Argentina	47.2939		47.2939		47.8338	71.9975	45.2414		20.683	82.262			17.3306	52.4127	21.6815		20.5617	52.4127	49.5042	49.5042		44.7152	61.7178	35.2693
Armenia					26.6816				25.1559		3.65127		6.60606									15.5237		15.5237
Aruba
Australia	20.8767		20.8767		25.1464	23.6089	18.6372	100	16.0934		29.7934		12.3797	52.4138	23.9164		6.73252	52.4138				30.9915	57.1091	19.3836
Austria									40.9194		33.6449											37.2821		37.2821
Azerbaijan					37.1681				32.598		8.88889		5.74713		41.6667							25.2138		25.2138
Bahamas
Bangladesh						0							14.1414	11.194				11.194				9.13237	7.46269	14.1414
Barbados
Belarus									48.0825													48.0825		48.0825
Belgium									66.7112													66.7112		66.7112
Belize					82.3065	88.196			65.3869	85.198			69.0428	68.599				68.599				75.3326	77.648	72.2454
Benin					85.0964	77.7486			60.8695	92.257	86.3422		44.6207	51.28			87.2511	51.28				70.7495	68.1414	72.836
Bhutan					57.7426	100	72.4258		34.9111	52.549	62.3261		61.5976	54.8526	62.1652		55.3598	54.8526	45.3145	45.3145		58.4163	61.5138	56.4804
Bolivia	80.7071	86.7201	80.7071		83.7256	80.8656	82.4708	84.9524	81.5304	80.954	83.2475	87.1292	77.902	78.1568	87.717	87.2748		78.1568				82.6386	83.0262	82.2509
Bosnia and Herzegovina	88.8889		88.8889						66.9761		75		76.699									79.2906		79.2906
Botswana	69.3389		69.3389		89.3319	0			18.5832	11.9321			21.9703	15.0721	0		44.4823	15.0721	93.4283	93.4283		41.6907	27.1009	50.8092
Brazil	81.3243	83.3849	81.3243	97.7394	43.8963	49.1971	81.9807	82.7178	61.0368	64.1216	83.772	85.1916	70.1024	71.6981	85.0835	84.9105		71.6981				75.2458	76.7399	73.565
British Indian Ocean Territory
British Virgin Islands
Brunei Darussalam					76.0417	66.0099	73.4513	71.7949	84.7826	68.2203	74.5098		82.2857	68.9815				68.9815				73.5059	68.7976	78.2142
Bulgaria	0		0		93.6				63.0616		65.8602		0									37.087		37.087
Burkina Faso									33.9487				11.479	22.2117			90.8136	22.2117				36.1329	22.2117	45.4138
Burma	64.5161		64.5161		54.66	56.0725	62.5281		42.3351	47.9704	54.1766		53.8187	54.0609	32.5344	30.9861	59.3546	54.0609	55.431	55.431		52.6533	49.7636	54.3871
Burundi					46.3203	50			41.6899	25.8106	43.787	75	38.0506	38.3603	50.2008	50.6329	40.1664	38.3603				44.8649	46.3607	43.3692
Cambodia	97.4813		97.4813		48.6493	57.8758			42.8596	87.8679			52.8253	53.5001			18.6459	53.5001				61.0687	63.186	59.6571
Cameroon	82.544	82.172	82.544		89.6365	90.8131	76.1121	70.9181	85.4722	89.357	91.0571	92.213	80.9713	79.829			94.491	79.829	79.4256	79.4256		83.93	83.0696	84.6949
Canada	29.8633		29.8633						7.76758		22.8013		8.45317		19.75							19.7498		19.7498
Cape Verde
Cayman Islands
Central African Republic					97.9392	97.6695	95.9223	95.8601	97.2964	97.0933	95.7179		96.2848	94.5395			96.4867	94.5395	0	0		81.4884	79.9503	82.8068
Chad					55.262	66.2959			35.9695				0.464396	0				0				26.332	22.0986	30.5653
Chile
China	65.0935		65.0935		60.4508	58.9068	51.4771		53.0007	45.7546	58.6149		55.9012	53.9464	60.5529	60.1665	16.0077	53.9464	9.51613	9.51613		48.6216	47.0395	49.5708
Christmas Island
Colombia	88.683	88.7071	88.683	97.0124	50.1396	49.5041	90.901	90.7879	41.6836	62.2985	81.2287	85.4487	76.1845	76.0171	73.6681	74.3478		76.0171				75.9595	77.7934	73.8964
Comoros
Congo					81.3975	81.3			88.9652	83.973			89.4804	89.3113			81.3352	89.3113	82.0405	82.0405		84.9155	85.1872	84.6438
Costa Rica	82.7586	85.7143	82.7586		74.0801	72.2129			77.3882	75.7289			65.4824	63.726				63.726				74.3576	72.2216	76.4936
Cote d'Ivoire					65.8033	65.3737			67.9067	67.0566	71.6429	93.3333	68.1493	67.9415			71.6266	67.9415	64.8677	64.8677		69.7092	71.0857	68.3327
Croatia	81.5951		81.5951						60.567		82.5624		47.5588									70.7757		70.7757
Cuba
Cyprus
Czech Republic									57.6749		56											56.8375		56.8375
Democratic Republic of the Congo	68.8312		68.8312		89.0438	89.3654	62.028	49.2821	83.9922	88.0346	89.8471	89.3203	86.2365	86.023	80.0333	80.5678	87.9397	86.023	84.5254	84.5254		80.8028	81.6427	80.1308
Denmark
Djibouti					4.54545																	4.54545		4.54545
Dominica
Dominican Republic
Ecuador	89.9311	89.5135	89.9311	93.4546	54.241	54.1938	88.2146	87.7388	44.281	44.8278	86.4265	87.8865	44.3107	44.5346	85.3249	84.6059		44.5346				71.4089	70.1433	72.8326
Egypt													0									0		0
El Salvador	6.55738		6.55738		23.2143				31.4073	30.2419	26.3158		15.3846									19.9541	30.2419	18.2395
Equatorial Guinea	86.4642	87.022	86.4642		86.5987	86.6861			86.6351	86.6365			86.6523	86.6498			86.8129	86.6498	79.926	79.926		85.6249	85.595	85.6505
Eritrea					23.8636								4.22357	4.26234				4.26234				9.15297	4.26234	14.0436
Estonia									42.3111		0				0		0					10.5778		10.5778
Ethiopia					75.9497				78.0302	66.8872	16.3043		68.4248	69.0676	69.4878	100	57.2347	69.0676				67.0454	76.2556	60.9053
Falkland Islands (Malvinas)
Faroe Islands
Fiji
Finland									5.15828		14.2768		6.58366		6.62377		11.2613		11.3216	11.3216		9.50672	11.3216	9.20424
France	75.3094		75.3094						48.0014		67.4152		69.9454									67.1962		67.1962
French Guiana	41.4154	41.5769	41.4154		33.3239	32.7832	46.912	46.6432	20.6897	13.7681	41.3063	41.3551	52.1635	51.6178	36.7667	37.6731		51.6178				39.4393	39.6294	39.2491
French Southern and Antarctic Lands
Gabon	72.6504	86.6861	72.6504		80.5225	80.4286			84.834	82.4692	71.2741		78.7334	78.6632			80.4379	78.6632	80.8484	80.8484		79.265	81.2931	77.7439
Gambia					0				0.474453				0.424074	0.466463				0.466463				0.366291	0.466463	0.299509
Georgia					78.243				66.1096		84.3179		67.6656									74.084		74.084
Germany									52.243													52.243		52.243
Ghana					53.4851	52.6696			51.5786	55.1429	53.8534		56.1374	55.3612			65.5867	55.3612	49.7581	49.7581		54.4266	53.6586	55.0666
Gibraltar
Greece	70.765		70.765		73.6313				69.8905		78.6781		66.8459									71.7626		71.7626
Greenland
Grenada
Guadeloupe
Guam
Guatemala	65.5502		65.5502		58.948	58.6852	26.9231		70.3826	68.0477	71.4823		70.4721	70.275	68.0365			70.275				63.719	66.8207	62.1681
Guinea					82.2024	78.4444			82.0555	78.0874	80.6505	65.1515	69.7107	69.0257			77.3238	69.0257	74.5554	74.5554		75.0657	72.3817	77.7497
Guinea-Bissau					15.7447				42.8163	98.7025			3.31105	10.5612				10.5612				30.2828	39.9416	20.624
Guyana	66.8878	71.1021	66.8878		30.8342	33.3005	45.1152	43.9949	16.0714	18.7215	40.9496	41.0226	81.5504	82.2254	22.6462	24.0356		82.2254				47.9732	49.5785	46.3678
Haiti
Heard Island and McDonald Islands
Honduras	40.9274		40.9274		67.9686	79.2336			55.9079	56.5059	39.7892		59.673	69.4587	64.4068			69.4587				58.5688	68.6642	52.8001
Hong Kong
Hungary											62.3894											62.3894		62.3894
Iceland
India	57.074		57.074		32.7465	39.1283	62.1455		49.7964	29.6599	45.3162		38.8752	48.1876	55.7507	35.6209	44.0376	48.1876	47.6928	47.6928		46.1866	41.4129	49.0509
Indonesia	77.4059		77.4059		75.495	74.8763	66.3427	70.3903	74.6191	74.4727	81.2232		68.6883	69.1956	67.4419		56.7568	69.1956	80.8892	80.8892		72.8305	73.1699	72.6268
Iran (Islamic Republic of)					7.90006		0		8.00293		0		17.472									6.67499		6.67499
Iraq					0																	0		0
Ireland
Isle of Man
Israel					0				12.1212				12.1212									8.08081		8.08081
Italy	60.3761		60.3761						34.7067		66.9048		0									44.4727		44.4727
Jamaica
Japan	40		40																			40		40
Jersey
Jordan					0.469116				0								0					0.156372		0.156372
Kazakhstan									16.5324				10.7204		48.0115		11.5745					21.7097		21.7097
Kenya					45.6227	37.931			12.5986	26.5872	55.5769	69.8778	28.6538	24.8317	67.8074	67.6564	57.2826	24.8317				43.2715	41.9526	44.5903
Kiribati
Korea, Democratic People's Republic of									69.6856													69.6856		69.6856
Korea, Republic of
Kuwait
Kyrgyzstan									25.9376				26.102		96.5517							49.5304		49.5304
Lao People's Democratic Republic	79.5597		79.5597		72.4616	74.2719			58.9242	59.4153	89.3563		62.8554	63.9023	51.0208	49.9295	36.7932	63.9023				64.7655	62.2842	66.3163
Latvia									57.544													57.544		57.544
Lebanon									6.77419													6.77419		6.77419
Lesotho
Liberia					78.8975	79.3462			79.7726	76.8146	82.3293	75.2577	69.5651	70.7086			69.9329	70.7086	78.8854	78.8854		75.9253	75.2869	76.5638
Libyan Arab Jamahiriya
Liechtenstein									38.6364													38.6364		38.6364
Lithuania									47.8856													47.8856		47.8856
Luxembourg									13.1579													13.1579		13.1579
Madagascar	78.3256	78.3445	78.3256		89.7128		0															64.9417	78.3445	61.591
Malawi	45.1093		45.1093		11.8982				40.1983	24.1056	29.0334		31.0683	30.509	22.3526	49.1158	30.5532	30.509				32.4635	33.5598	31.9153
Malaysia	70.8333	88.172	70.8333		63.8095	59.1385	77.1363	77.732	74.6328	74.2561	80.641	84.6051	78.0243	77.742			81.0876	77.742				75.7591	77.0554	74.6248
Mali									67.3571				9.37492	12.8338			52.1739	12.8338				30.9147	12.8338	42.9686
Malta
Marshall Islands
Martinique
Mauritania
Mauritius
Mayotte
Mexico	20.3371		20.3371		55.1544	57.9208			29.1957	54.5015	48.4607		27.9251	45.2361	69.4475			45.2361				43.0684	50.7236	38.6939
Monaco
Mongolia					63.3642				21.198		28.4793		19.5046		33.8623							33.2817		33.2817
Montenegro	51.8786		51.8786						47.3908				53.8843									51.2581		51.2581
Morocco									2.39659				6.16603									4.28131		4.28131
Mozambique	85.273		85.273		44.0074	48.1061			54.9285	38.4544	36.8187		42.317	42.1293	0		45.4008	42.1293				47.0698	42.7048	49.2523
Namibia	17.6625		17.6625		47.7226		89.5963		6.84916	62.0575			45.3216	5.96387	24.1371		9.22621	5.96387				30.1967	24.6618	32.2723
Nepal	2.77778		2.77778		12.3018		27.1605		27.8452	0	9.7351		27.8312	27.1983	24.1454		24.4163	27.1983	18.9137	18.9137		17.9439	18.3276	17.7905
Netherlands
Netherlands Antilles
New Caledonia
New Zealand
Nicaragua	0		0		46.4371	31.8795			46.7883	57.742	5.88235		59.4047	59.2854				59.2854				36.6705	52.0481	26.4187
Niger									0				0	0				0				0	0	0
Nigeria	0		0		67.1979	62.7072	71.988	54.1946	49.4377	57.1464			37.2257	38.4889			68.3096	38.4889	36.1926	36.1926		44.1122	47.8698	41.2939
Niue
Norfolk Island
Northern Mariana Islands
Norway					31.6292				26.015				22.8151		55.9406		26.6976		58.3737	58.3737		39.9778	58.3737	36.9119
Oman					0												0		0	0		0	0	0
Pakistan					0.462535				19.8473				20.9302									13.7467		13.7467
Palau
Palestine					0				0				0									0		0
Panama	20	0	20		64.3889	64.4274	88.1356		60.4087	63.0316	83.5093	100	63.5387	63.0182				63.0182				57.9597	58.9159	57.1402
Papua New Guinea
Paraguay	64.4427		64.4427		61.6069	58.5817			66.1621	60.5911			50.8042	54.2923		0		54.2923				53.5216	45.5515	61.4917
Peru	96.3429	96.2804	96.3429	96.5332	83.8584	83.2341	96.1404	95.9668	66.6481	68.6297	94.6858	95.177	76.7798	75.2145	96.0971	95.9191		75.2145				87.592	86.9077	88.3619
Philippines					75	74.3793							75.3304									74.9032	74.3793	75.1652
Pitcairn Islands
Poland									29.5547													29.5547		29.5547
Portugal	63.9789		63.9789						59.915				57.1429									61.2539		61.2539
Puerto Rico
Qatar
Republic of Moldova									12.6435		13.3333		50.6116									25.5295		25.5295
Reunion
Romania									53.084		67.5508		70.4655									63.7001		63.7001
Russia	76.4212		76.4212		36.6728		53.0984		32.1224		60.3709		24.9299		48.6997		43.7624		76.8255	76.8255		55.1045	76.8255	52.9324
Rwanda					51.0305	50.3072			30.4503	35.6299	53.6623	66.5119	50.632	51.7077	48.9891	48.4081	49.5558	51.7077	25	25		45.6138	47.0389	44.1886
Saint Helena
Saint Kitts and Nevis
Saint Lucia
Saint Martin
Saint Pierre and Miquelon
Saint Vincent and the Grenadines
Samoa
Sao Tome and Principe
Saudi Arabia
Senegal					0				3.82904				1.27331	1.65891				1.65891				1.68403	1.65891	1.70078
Serbia	0		0						59.3586		64.5902											30.9872		30.9872
Seychelles
Sierra Leone					51.8246	6.98925			34.1094	46.081	90.8362		34.8569	36.9274			42.4327	36.9274	29.0903	29.0903		39.9241	31.2031	47.1917
Singapore					0	0																0	0	0
Slovakia									58.8322		70.4918											64.662		64.662
Slovenia	60.2703		60.2703						65.8477		80.6255		60.7143									65.5456		65.5456
Solomon Islands
Somalia					23.1088				11.1111				77.4008	7.21649				7.21649				25.2107	7.21649	37.2069
South Africa	9.5938		9.5938		16.0635	24.5456	68.2243		25.2919	22.7317	13.4736		20.8355	24.6015	21.8291		25.503	24.6015	17.1238	17.1238		22.7424	22.7209	22.7532
South Georgia South Sandwich Islands
Spain	67.25		67.25						67.9094		68.7839		75.525									69.3437		69.3437
Sri Lanka													50.4132									50.4132		50.4132
Sudan					94.3228	94.4324			75.9881	78.8514	93.0673	100	66.8303	67.9758	89.0421	88.4262	99.5781	67.9758				84.7075	82.9436	86.4714
Suriname	46.3321	46.6917	46.3321		20.464	20.4685	46.2685	46.3468	0	0.813008	44.2423	44.2725	47.5652	47.3474	41.0133	41.8489		47.3474				36.7096	36.892	36.5272
Svalbard
Swaziland					56.3428	48.0839			61.1008	44.2055			54.2525	54.1642				54.1642				53.1877	50.1544	57.232
Sweden					34.2818				16.9528				8.70767				19.0217					19.741		19.741
Switzerland									11.5782		34.1121											22.8452		22.8452
Syrian Arab Republic					0				3.07845								1.76391					1.61412		1.61412
Taiwan
Tajikistan									11.2697				7.89474				0					6.38815		6.38815
Thailand	47.6804		47.6804		54.8348	54.7625	75.1552	79.9572	56.7307	56.5814	50.8966		57.5807	57.2868	46.5639	49.3275	56.5672	57.2868	53.7368	53.7368		56.2568	58.4198	54.7427
The former Yugoslav Republic of Macedonia	20.3077		20.3077						26.4785		60.3774		25.5814									30.6105		30.6105
Timor-Leste
Togo					81.5985	78.1918			65.4771	81.7966	79.0038		62.4732	66.7066			79.1667	66.7066	87.3369	87.3369		75.9813	76.1477	75.8427
Tonga
Trinidad and Tobago													34.375	43.8596				43.8596				40.6981	43.8596	34.375
Tunisia									0				6.36234									3.18117		3.18117
Turkey	59.5843		59.5843		7.36971				53.5421				36.8458									43.3852		43.3852
Turkmenistan
Turks and Caicos Islands
Tuvalu
Uganda					75.3861	69.4681	90.5018		31.671	61.3558	80.1164	55.4161	84.0277	84.0881	67.8993	69.7083	84.1354	84.0881	70.4289	70.4289		71.9147	70.6505	73.0208
Ukraine									25.4886		34.8993		47.2888									35.8922		35.8922
United Arab Emirates					0												0		0	0		0	0	0
United Kingdom
United Republic of Tanzania	45.121	0	45.121		65.0887	66.9305			69.8009	59.4149	67.9988	70.6564	65.2755	66.3233	58.2832	64.2042	67.4389	66.3233	51.7314	51.7314		57.732	55.698	59.5399
United States	69.0503		69.0503		69.6969		80.166		34.4075		5.81756		33.0789		70.9066							54.0218		54.0218
United States Minor Outlying Islands
United States Virgin Islands
Uruguay	0		0		25		50		27.2727				0		37.5		0		35.2941	35.2941		21.0361	35.2941	19.4519
Uzbekistan									0				0.563197									0.281599		0.281599
Vanuatu
Venezuela	91.4427	94.8248	91.4427		55.3485	53.0655	89.1597	89.1987	35.527	36.9515	66.6351	73.7614	47.7876	47.1829	78.4298	78.1702		47.1829				67.2569	65.0422	69.4716
Viet Nam	71.2859		71.2859		61.2341	64.5132	0	0	60.8919	64.6407	95.347		60.5374	60.0873	59.8485	65.7943	63.4907	60.0873				57.2696	52.5205	60.4357
Western Sahara
Yemen					0																	0		0
Zambia	18.8786		18.8786		40.6191	61.1345			19.6531	56.405	63.1739		52.4025	51.0114	24.9162	70.6468	49.4966	51.0114	65.9347	65.9347		47.3398	59.3573	39.3282
Zimbabwe	67.9574		67.9574		11.371	15.9665			6.1	8.41008	9.54931		8.22139	8.25325	12.5		10.4014	8.25325				19.5784	10.2208	24.2572
OVERALL	100	100	100	81.8871	100	100	54.0258	59.1157	100	100	42.3235	66.1809	100	100	41.0758	63.4389	100	100	63.5692	63.5692		81.7593	83.4192	80.0994

## Sheet: EVI
NAME	amp_bs1	amp_OA1	amp_bs2	amp_OA2	rep_bs1	rep_OA1	rep_bs2	rep_OA2	mam_bs1	mam_OA1	mam_bs2	mam_OA2	bird_bs1	bird_OA1	bird_bs2	bird_OA2	od_bs1	od_OA1	od_bs2	od_OA2		overall	BS	OA
Afghanistan									0				0.479042				0.416667		0			0.223927		0.223927
Åland Islands
Albania	45.2429								49.4996		76.7442		19.2719									47.6897		47.6897
Algeria									3.52487				37.4985									20.5117		20.5117
American Samoa
Andorra											0											0		0
Angola	31.6808				88.0908	96.485	65		85.6502	96.4076			66.6051	76.5971			84.2719	91.3249	82.8027	100		80.4097	92.1629	72.0145
Anguilla
Antigua and Barbuda
Argentina	71.8623		85.906		80.6851	96.6765	87.931		88.382	99.1563			62.3929	77.4054	87.0986		88.7566		87.0582			84.4426	91.0794	82.2303
Armenia					49.5516				35.1351		12.5186		12.7273									27.4832		27.4832
Aruba
Australia	48.305		70.0822		61.378	61.7544	75.2845	0	54.9934		66.4362		22.3756	74.0496	75.5403		10.9968					51.7663	45.268	53.9324
Austria									58.3406		26.1682											42.2544		42.2544
Azerbaijan					70.2065				49.3873		22.2222		12.3563		0							30.8345		30.8345
Bahamas
Bangladesh						0							95.9596	86.5672								60.8423	43.2836	95.9596
Barbados
Belarus									86.1581													86.1581		86.1581
Belgium									88.369													88.369		88.369
Belize					92.6172	97.2896			85.4942	96.7567			91.6906	90.5279								92.396	94.8581	89.934
Benin					91.6227	88.1588			94.7901	95.7466	89.0633		94.6976	95.3118			91.7027	93.4261				92.7244	93.1608	92.3753
Bhutan					88.7258	100	96.4223		55.2547	88.6275	89.8557		86.2772	74.9963	90.8832		81.3128		66.3784			83.5213	87.8746	81.8888
Bolivia	84.0381	87.9592	96.4904		92.2746	90.7157	85.3727	87.1327	92.3094	88.845	86.5428	88.1027	86.3306	87.2126	91.4398	90.2177						88.9989	88.598	89.3498
Bosnia and Herzegovina	66.6667								90.9865		50		80.3883									72.0104		72.0104
Botswana	81.4159				98.3138	25			36.1298	57.1549			34.562	27.7489	22.1925		53.037	64.4004	97.8038			54.3417	43.576	60.4935
Brazil	94.7979	95.9753	97.0574	99.5697	80.6261	79.3647	93.747	95.3634	88.9042	87.9204	93.5484	95.8167	91.6308	90.3914	95.6576	95.5636						92.2459	92.4956	91.9962
British Indian Ocean Territory
British Virgin Islands
Brunei Darussalam					63.5417	70.4433	82.3009	87.1795	92.3913	74.5763	93.1373		92	73.6111								81.0201	76.4526	84.6742
Bulgaria	100				97.6				89.8502		68.362		100									91.1624		91.1624
Burkina Faso									90.0414				90.9197	91.2757			92.7822	95.1507				92.0339	93.2132	91.2478
Burma	78.4946				89.3501	93.0864	83.4249		95.037	92.0567	79.6136		95.0567	92.045	95.5713	91.5398	97.0471	96.3547	80.7789			89.9612	93.0165	88.2638
Burundi					69.697	77.6515			58.4958	42.0882	63.3136	100	49.9531	58.1984	94.7791	78.7975	58.1694	22.3925				64.4613	63.188	65.7347
Cambodia	98.7407				83.7663	85.6436			88.6011	97.2404			90.5769	90.6561			81.569	83.6265				88.9356	89.2917	88.6508
Cameroon	98.1788	96.3761			97.1547	97.4875	93.3304	95.0748	96.8697	97.978	98.8145	98.6324	95.1138	94.3821			98.409	98.3541	98.1745	95.5608		96.8682	96.7307	97.0057
Canada	40.444		63.8478						17.1585		46.0471		20.6823		40.9006							38.1801		38.1801
Cape Verde
Cayman Islands
Central African Republic					98.995	98.9232	97.9991	97.941	99.0722	99.0444	97.9849		98.5206	98.6819			98.5732	98.6496	100	50		94.9527	90.54	98.735
Chad					86.5936	88.5428			85.5393				34.5201	42.2167								67.4825	65.3798	68.8844
Chile
China	84.2517		79.405		77.3017	85.1194	65.7192		83.2803	72.0708	67.283		80.2113	70.5466	96.4488	91.8431	47.815		37.7419			74.217	79.895	71.9458
Christmas Island
Colombia	98.9538	98.932	98.8112	98.8079	76.3164	76.5505	98.1648	98.4184	96.9999	84.7294	91.1394	96.9113	91.3214	90.783	98.682	98.5179						93.3774	92.9563	93.7986
Comoros
Congo					92.1914	92.2066			93.8147	95.1646			95.672	95.5424			92.1437	92.2229	91.8983	76.2313		91.7088	90.2736	93.144
Costa Rica	93.1034	100			90.0793	89.3018			95.8824	90.6535			94.5342	85.8374								92.424	91.4482	93.3998
Cote d'Ivoire					89.9336	92.9316			94.1249	92.1603	81.9777	80	94.2069	92.1232			87.4674	90.9892	96.9372	94.8231		90.6396	90.5046	90.7746
Croatia	85.2761								69.244		94.9206		44.3038									73.4361		73.4361
Cuba
Cyprus
Czech Republic									74.2056		100											87.1028		87.1028
Democratic Republic of the Congo	75.2409				96.349	96.72	89.2133	88.7692	95.3768	96.0199	97.1198	94.1206	96.8528	96.9564	93.9705	93.0429	95.88	95.1426	96.7984	96.2226		93.7527	94.6243	92.9779
Denmark
Djibouti					2.27273																	2.27273		2.27273
Dominica
Dominican Republic
Ecuador	98.6218	97.7872	98.9358	98.2149	94.7417	96.9097	97.1902	97.6715	93.7686	92.7951	98.8385	97.9781	96.21	94.7324	98.7309	97.7734						96.9312	96.7328	97.1297
Egypt													11.1111									11.1111		11.1111
El Salvador	68.8525				49.4898				70.0839	65.3226	56.3467		70.1923									63.3813	65.3226	62.993
Equatorial Guinea	98.5296	97.8998			96.8164	97.4592			98.5212	97.5183			98.5363	97.5236			98.8323	97.447	88.5291			97.0557	97.5696	96.6275
Eritrea					91.6667								44.4714	45.9541								60.6974	45.9541	68.069
Estonia									77.9791		0				0		0					19.4948		19.4948
Ethiopia					96.7586				76.6201	43.441	0		83.5969	82.1808	74.0343	0	58.2297					57.2068	41.8739	64.8733
Falkland Islands (Malvinas)
Faroe Islands
Fiji
Finland									38.6305		44.1801		39.2049		33.081		45.3459		36.2789			39.4536		39.4536
France	76.2866								76.3961		71.6835		30.0546									63.6052		63.6052
French Guiana	99.0167	98.8787	96.0729		97.1132	97.4766	99.542	99.6758	27.5862	44.9275	98.9477	98.7189	99.8968	99.5792	98.5474	98.2407						90.2814	91.0711	89.5904
French Southern and Antarctic Lands
Gabon	95.3009	94.6223			96.85	97.0837			97.4889	98.0283	93.5795		98.208	97.7684			97.2388	96.9146	98.6195	99.9737		97.0521	97.3985	96.7551
Gambia					30.7692				69.7628				66.1393	66.7203								58.3479	66.7203	55.5571
Georgia					92.0361				87.6304		82.7707		77.6025									85.01		85.01
Germany									72.7134													72.7134		72.7134
Ghana					77.5169	80.3943			88.9665	80.6733	63.1693		88.7563	87.154			84.8065	87.9253	81.6116	73.7954		81.3427	81.9885	80.8045
Gibraltar
Greece	54.5506				89.997				59.3863		89.5071		62.7929									71.2468		71.2468
Greenland
Grenada
Guadeloupe
Guam
Guatemala	90.4306				88.7576	89.733	100		90.3143	91.9774	89.6641		96.8573	96.0409	90.8676							92.4643	92.5838	92.4131
Guinea					92.8546	93.6353			93.487	94.5824	89.8805	93.9394	95.5359	94.1483			92.1479	93.0388	96.8992	90.5063		93.388	93.3084	93.4675
Guinea-Bissau					81.1348				79.1103	99.3513			49.3238	52.4503								72.2741	75.9008	69.8563
Guyana	94.0912	99.5975			95.9374	96.2909	95.7267	95.9675	26.7857	56.621	96.3132	96.0698	98.6428	98.8125	95.2692	94.874						88.6428	91.1762	86.1095
Haiti
Heard Island and McDonald Islands
Honduras	89.834		98.3757		92.0547	90.5851			86.2533	89.7412	86.9411		90.9732	92.4353	89.8305							90.7024	90.9205	90.6089
Hong Kong
Hungary											86.1357											86.1357		86.1357
Iceland
India	81.3319		52.5669		65.6998	81.252	87.5808		75.4759	86.6184	77.185		77.0232	79.8805	87.5762	90.1307	72.602		80.1044			78.2163	84.4704	75.7146
Indonesia	94.5607		98.5542		92.7475	93.7251	92.2165	96.449	97.0662	94.2388	93.8838		92.7932	88.7817	91.8605		70.2703		94.3597			92.2505	93.2987	91.8312
Iran (Islamic Republic of)					7.94799		0		6.29307		1.49254		8.58499									4.86372		4.86372
Iraq					1.57819																	1.57819		1.57819
Ireland
Isle of Man
Israel					95.2663				0				0									31.7554		31.7554
Italy	81.6472								49.3157		87.381		100									79.586		79.586
Jamaica
Japan	80																					80		80
Jersey
Jordan					1.06333				0								0.274223					0.445851		0.445851
Kazakhstan									49.2162				39.4548		67.3208		68.3221					56.0785		56.0785
Kenya					63.1898	76.7116			12.6118	25.275	45.0818	59.2606	35.1797	30.7208	54.6437	54.1139	47.8278	42.2508				45.5723	48.0555	43.0891
Kiribati
Korea, Democratic People's Republic of									95.6045													95.6045		95.6045
Korea, Republic of
Kuwait
Kyrgyzstan									50.424				50.3749		72.4138							57.7376		57.7376
Lao People's Democratic Republic	90.2419		100		89.1335	92.7915			96.5244	93.2609	98.9033		96.1421	92.7964	98.0506	94.091	95.381	92.9917				94.6391	93.1863	95.5471
Latvia									85.0837													85.0837		85.0837
Lebanon									0.215054													0.215054		0.215054
Lesotho
Liberia					97.5053	98.4364			99.2491	98.2626	98.2215	97.9381	98.6439	97.5333			98.7715	97.4771	98.8824	98.7153		98.303	98.0605	98.5456
Libyan Arab Jamahiriya
Liechtenstein									63.6364													63.6364		63.6364
Lithuania									79.4776													79.4776		79.4776
Luxembourg									71.0526													71.0526		71.0526
Madagascar	95.0693	93.9722	70		98.1536		100															91.439	93.9722	90.8057
Malawi	57.5769		60.5863		53.6884				65.7298	68.1222	87.2324		87.0496	87.0917	41.1847	89.5608	84.4002	61.1742				70.2831	76.4872	67.181
Malaysia	98.2143	97.1326	97.0213		89.132	87.6462	95.1775	96.5667	98.0508	95.8042	97.6562	96.4112	97.1845	94.7056			97.3026	95.3826				95.5592	94.807	96.2174
Mali									91.2675				46.8032	64.9664			93.4783	97.7778				78.8586	81.3721	77.183
Malta
Marshall Islands
Martinique
Mauritania
Mauritius
Mayotte
Mexico	82.3874				96.4843	76.7327			77.5829	88.4417	85.9768		61.256	88.3223	92.8494							83.337	84.4989	82.7561
Monaco
Mongolia					67.0953				55.5725		35.9778		53.2674		41.381							50.6588		50.6588
Montenegro	56.3584								90.4146				52.0661									66.2797		66.2797
Morocco									0.359091				6.46088									3.40998		3.40998
Mozambique	91.3062				85.0888	86.9019			76.7754	87.6709	88.3502		85.0029	83.5164	66.3793		86.8157	84.4482				83.8414	85.6343	82.8169
Namibia	12.0295				76.9892		100		29.1339	19.469			58.6636	25.5907	13.0763		42.2909	44.6078				42.1851	29.8892	47.4548
Nepal	66.6667		100		79.6399		81.4815		61.2398	33.3333	75.8278		80.8783	76.4028	82.3114		65.4744		71.484			72.895	54.8681	76.5004
Netherlands
Netherlands Antilles
New Caledonia
New Zealand
Nicaragua	100				93.4086	98.1308			88.2355	94.9605	73.262		98.1221	96.1793								92.7874	96.4235	90.6056
Niger									96.5785				76.5604	52.9076								75.3489	52.9076	86.5695
Nigeria	0				90.0449	89.8392	90.9208	98.8255	84.3972	91.9121			75.5342	77.4238			87.9673	89.418	92.1934	96.5639		81.9262	90.6637	74.4368
Niue
Norfolk Island
Northern Mariana Islands
Norway					75.659				61.2733				62.2506		79.703		70.1937		92.9591			73.6731		73.6731
Oman					0												0.0859107		0.00892618			0.0316123		0.0316123
Pakistan					76.5032				22.9008				25.1163									41.5068		41.5068
Palau
Palestine					0				0				0									0		0
Panama	90	92.8571			94.1953	95.4163	94.9153		95.7622	93.9943	98.1521	100	97.7951	95.6482								95.3396	95.5832	95.1366
Papua New Guinea
Paraguay	83.9792				91.9867	92.1739			93.2343	95.5665			81.2268	84.6182		100						90.3482	93.0896	87.6068
Peru	99.2093	98.9946	98.8162	98.5546	96.6134	97.2631	98.4988	98.7277	93.6444	92.584	99.0306	98.7411	97.4618	96.3075	99.0442	98.7555						97.6404	97.491	97.7898
Philippines					88.0972	91.9118							85.4626									88.4905	91.9118	86.7799
Pitcairn Islands
Poland									67.7057													67.7057		67.7057
Portugal	12.4459								15.1624				0									9.20276		9.20276
Puerto Rico
Qatar
Republic of Moldova									85.9445		85.7778		93.476									88.3994		88.3994
Reunion
Romania									72.8762		91.6982		87.2998									83.9581		83.9581
Russia	87.2582		100		64.4581		66.7604		48.3622		61.5669		39.2253		62.3963		51.2774		82.7878			66.4093		66.4093
Rwanda					80.2143	83.1151			75.6969	59.6159	80.0617	90.6089	68.261	71.502	85.9887	81.2812	79.2766	65.962	100	94.4444		79.7163	78.0756	81.357
Saint Helena
Saint Kitts and Nevis
Saint Lucia
Saint Martin
Saint Pierre and Miquelon
Saint Vincent and the Grenadines
Samoa
Sao Tome and Principe
Saudi Arabia
Senegal					32.6625				91.6319				83.7866	84.8261								73.2268	84.8261	69.3604
Serbia	50								92.9784		96.7213											79.8999		79.8999
Seychelles
Sierra Leone					85.5917	93.1452			94.5035	95.3394	96.3358		93.9486	92.075			94.2172	91.4504	81.4654			91.8072	93.0025	91.0104
Singapore					0	0												0				0	0	0
Slovakia									78.1565		93.6355											85.896		85.896
Slovenia	73.2432								79.8526		93.7608		73.2143									80.0177		80.0177
Solomon Islands
Somalia					48.7706				44.4444				92.9718	90.2062								69.0983	90.2062	62.0623
South Africa	3.97341		25.3545		47.3104	46.0512	74.7664		31.94	44.9223	24.8316		38.5204	45.2972	12.2608		43.0705	46.8006	9.90928			35.3577	45.7678	31.1937
South Georgia South Sandwich Islands
Spain	25.9436		17.3913						34.7596		46.578		44.4967									33.8339		33.8339
Sri Lanka													67.7686									67.7686		67.7686
Sudan					91.257	94.4782			69.654	71.5336	89.4528	100	60.0858	70.1231	88.9682	88.2471	100	100				85.3167	87.397	83.2363
Suriname	98.247	98.2561			94.9301	94.1299	97.9274	98.1227	33.3333	61.7886	98.0364	97.7992	99.6196	99.5413	96.4993	96.4145						90.3318	92.2932	88.3704
Svalbard
Swaziland					88.6056	86.4305			86.3433	82.0789			84.5948	85.1896								85.5404	84.5663	86.5146
Sweden					78.7789				29.7816				25.2042				48.0467					45.4529		45.4529
Switzerland									36.3428		55.6075											45.9751		45.9751
Syrian Arab Republic					12.2449				8.73883								17.3677					12.7838		12.7838
Taiwan
Tajikistan									27.3565				19.0146				0.401606					15.5909		15.5909
Thailand	89.6907				89.2807	91.5573	84.8628	91.968	94.9925	92.1333	86.5287		94.8442	92.3045	96.1409	93.1669	95.2774	91.2952	85.9247			91.3312	92.0709	90.8381
The former Yugoslav Republic of Macedonia	22								31.1828		78.4906		27.7132									39.8466		39.8466
Timor-Leste
Togo					89.8925	88.8933			86.2275	91.4306	85.5413		85.1341	88.6092			86.3653	90.3922	97.1484	93.6077		89.3856	90.5866	88.3848
Tonga
Trinidad and Tobago													75	15.7895								45.3947	15.7895	75
Tunisia									3.68098				13.6662									8.67359		8.67359
Turkey	72.9792				15.1466				42.1511				15.2615									36.3846		36.3846
Turkmenistan
Turks and Caicos Islands
Tuvalu
Uganda					90.883	92.727	90.5018		80.8265	60.4829	78.7434	72.7362	75.0184	75.3731	91.1669	91.4396	76.0178	47.6473	86.8571	79.4467		79.3245	74.2647	83.7519
Ukraine									84.3752		98.6577		82.7952									88.6094		88.6094
United Arab Emirates					0												0		0			0		0
United Kingdom
United Republic of Tanzania	59.3819	100	85.9259		83.3269	91.6804			88.2191	75.1419	82.2289	61.9399	85.8461	86.7576	55.3252	60.1792	81.7679	71.8649	84.68	13.3333		74.5646	70.1121	78.5224
United States	86.6615		90.75		90.4444		94.6308		55.8781		4.67649		70.5827		88.9633							72.8234		72.8234
United States Minor Outlying Islands
United States Virgin Islands
Uruguay	0				75		37.5		54.5455				25		56.25		60		52.9412			45.1546		45.1546
Uzbekistan									83.6735				9.73681									46.7051		46.7051
Vanuatu
Venezuela	96.5968	98.8863			80.108	79.6496	92.6573	92.6859	89.9843	63.1927	84.9161	90.1992	74.1935	73.6284	91.7184	91.533						85.7107	84.2536	87.1678
Viet Nam	88.119		74.5763		79.9743	86.3779	42.8571	57.1429	92.4506	90.0642	97.4763		90.6446	86.446	97.4747	95.1791	77.403	80.8036				82.466	82.6689	82.3307
Western Sahara
Yemen					26.087																	26.087		26.087
Zambia	27.7543				75.4544	90.5462			58.3902	88.114	90.8153		84.8215	82.5911	27.3635	87.5622	83.3473	86.0643	75.4643	80.8479		74.224	85.9543	65.4263
Zimbabwe	93.1257				54.0979	49.6062			44.1249	49.7073	50.2324		48.2524	49.4441	87.5		51.2892	52.2681				57.2408	50.2564	61.2318
OVERALL	87.2076	96.1427	94.3215	99.1577	79.2263	83.0721	88.7284	95.5814	61.1365	87.3129	84.0826	95.2547	61.3935	85.6521	81.2832	94.7134	81.3496	88.2394	89.4608	93.661		86.3489	91.8787	80.819

## Sheet: metadata
Percentages of species richness hotspots within the hotspots from each productivity index.
OA	Overall. Global productivity hotspots
BS	Biome specific. Hotspots were generated for each biome seperately within the productivity layers
	All indicies consistently show based on any summary NDVI overlaps most, followed by EVI then LAI, irrespective of how totals are calculated. BS also performs better than OA
