# Supplementary material for: Are debt-for-nature swaps scalable: Which nature, how much debt, and who pays?
Source: Ambio. 2023 Sep 2;53(1):63–78. doi: 10.1007/s13280-023-01914-4 (PMC10692041; doi:10.1007/s13280-023-01914-4)
Supplement: Supplementary file 4 — Supplementary file4 (XLSX 16 kb) [file 13280_2023_1914_MOESM4_ESM.xlsx]

## Sheet: Sheet1
	%country_KBA	%KBA_in_Priority	All	Forest	Grass	Desert	Mangrove	Freshwater	forest_extent_2010__ha	%_deforestation
Afghanistan	6.09798	1.21955	0.02	0	0.06	0.13		0	71796.8	2.58337
Angola	6.5479	63.1525	2.58	1.78	9.52	0.99	0.01	1.65	5.38472e+07	5.78255
Bangladesh	0.644096	16.882	0.01	0.01			2.32	0.1	2.21675e+06	8.87088
Benin	1.23898	62.9061	0.2	0.02	0.74		0.09	0.07	435563	9.32706
Bhutan	1.2535	69.8867	0.06	0.09	0.03			0.01	2.5087e+06	0.872377
Burkina Faso	1.07514	23.2276	0.06	0	0.22			0.03	2238.83	5.8569
Burundi	0.131328	10.4288	0	0	0.01			0	553131	5.33917
Cambodia	4.57843	45.2235	0.13	0.18			0.05	0.23	7.64174e+06	32.1622
Cameroon	3.26336	90.1961	0.92	1.17	1.46		0.2	0.54	3.05435e+07	4.99697
Cabo Verde	0.053376	11.6307	0	0					6766.62	1.68528
Central African Republic	6.28448	97.2117	1.49	1.77	5.07			0.64	4.72408e+07	1.78476
Chad	10.6755	4.64494	0.16	0.01	0.59	0		0.35	622312	8.02229
Comoros	0.0432	76.4444	0	0				0	132154	4.26876
Congo, Rep.	5.54099	95.0553	0.82	0.97	0.95			2.23	2.66367e+07	3.19341
Côte d'Ivoire	1.92531	44.4437	0.3	0.1	0.27		0.27	0.16	1.39533e+07	23.4645
Congo, Dem. Rep.	13.1757	90.2415	5.2	6.47	9.47		0	7.02	198452936	8.01062
Djibouti	0.082624	1.31681	0			0
Dominica	0.01984	50.9677	0	0		0		0	70693.8	35.2862
Ethiopia	11.8935	40.4152	0.99	0.33	2.95	1.22		0.37	1.23611e+07	3.46061
Fiji	0.442624	83.8635	0.04	0.01				0.04	1.41874e+06	3.10274
Gambia, The	0.060736	8.1138	0		0.01		0.03	0.02	3885.45	17.213
Ghana	1.51578	31.6965	0.12	0.04	0.17		0.04	0.07	7.03463e+06	18.6436
Grenada	0.002752	62.7907	0	0		0		0	27554.2	6.16267
Guinea	0.53728	67.7546	0.38	0.27	1.19		0.54	0.21	8.02366e+06	21.1119
Guinea-Bissau	0.57824	72.0089	0.03	0.02	0.08		0.7	0.09	1.12659e+06	15.516
Guyana	0.085952	99	0.48	0.81	0.04		0.31	0.75	1.90521e+07	1.15904
Haiti	0.651648	9.49715	0.01	0			0.04	0.01	792451	9.10034
Honduras	1.0471	82.9595	0.15	0.19	0.05		0.7	0.23	7.55477e+06	15.7367
Kenya	5.66835	25.236	0.12	0.04	0.24		0.12	0.03	3.3355e+06	10.8177
Kyrgyz Republic	0.6592	8.39806	0.03	0	0.1	0		0	577910	0.418044
Lao PDR	4.17229	63.6244	0.28	0.38				0.08	1.79419e+07	20.7784
Lesotho	0.2368	8.59459	0.01	0.01	0.05			0	10578.8	1.10162
Liberia	2.28435	97.1927	0.215936	0.18	0	0.01	0.09	0.29	9.2835e+06	20.6641
Madagascar	7.87942	63.6424	0.56	0.52	0.01	1.91	1.63	0.39	1.64364e+07	25.1118
Malawi	1.34586	44.3578	0.12	0.06	0.45			0.09	1.47059e+06	13.0949
Maldives	0.000128	0							2787.11	2.24533
Mali	2.06874	8.01262	0.19	0	0.72			0.08	49160.3	7.45348
Mauritania	0.907328	0.324469	0		0			0	0.81281
Moldova	9.72282	16.6167	0.02	0	0.01			0	358429	2.72377
Mongolia	0.068992	47.4026	0.41	0.13	1.12	0.59		0.02	3.55263e+06	12.2515
Mozambique	2.73984	51.9178	1.16	0.63	3.71		1.08	0.51	2.69738e+07	13.0419
Myanmar	10.193	59.0575	0.72	0.96	0.04		0.79	0.44	4.09194e+07	9.77056
Nepal	3.02688	21.9981	0.06	0.04	0.08			0.02	4.80174e+06	1.01189
Nicaragua	1.97894	73.746	0.09	0.13	0.03		0.46	0.18	7.62224e+06	20.7955
Niger	8.46912	0.425452	0		0.01	0		0.02	47.8086	2.66965
Nigeria	2.9769	47.5212	0.32	0.1	1.05		0.2	0.22	1.09344e+07	9.55089
Pakistan	4.14605	3.0703	0.05	0	0.15	0.24	0.02	0.01	648196	1.49402
Papua New Guinea	1.39968	94.449	1.03	1.26	0.23		7.41	2.2	4.29213e+07	3.65967
Rwanda	0.470144	42.2134	0.01	0.01	0.02			0.02	517840	7.27376
Samoa	0.0864	0
Sao Tome and Principe	0.044416	70.4611	0	0				0	14213.4	0.543303
Senegal	2.38234	29.2311	0.09	0.01	0.32		0.29	0.08	47869.2	9.3289
Sierra Leone	0.378048	85.9997	0.13	0.08	0.15		0.46	0.23	5.42696e+06	31.4754
Solomon Islands	1.06771	89.3005	0.06	0.09			1.64	0.04	2.72715e+06	7.06433
Somalia	3.84192	11.0811	0.06	0.01	0.06	0.11		0.02	146473	2.81054
St. Lucia	0.012352	53.3679	0	0		0			49888.8	2.03119
St. Vincent and the Grenadines	0.011072	64.1618	0	0		0			29655	1.33962
Tajikistan	1.2656	2.75601	0		0.02			0	31672.8	1.07098
Tanzania	14.5882	45.9887	0.89	0.23	3.02		0.61	0.47	2.47039e+07	10.9103
Timor-Leste	0.297856	6.74688	0	0			0.02	0	692839
Togo	0.39264	24.1239	0.05	0.01	0.18			0.02	599793	10.2368
Tonga	0.015232	60.9244	0
Uganda	1.9056	60.6314	0.27	0.03	0.89			0.2	6.9269e+06	13.2463
Uzbekistan	3.20307	0.801231	0	0	0	0.06		0	74271.1	1.57575
Vanuatu	0.329024	88.8932	0.02	0.03			0.21	0	1.148e+06	1.42373
Yemen, Rep.	1.42925	1.85832	0		0	0.07		0	146.672
Zambia	8.6848	80.5099	1.4	0.7	5.12			1.39	2.24363e+07	8.33311
