# Supplementary material for: Are debt-for-nature swaps scalable: Which nature, how much debt, and who pays?
Source: Ambio. 2023 Sep 2;53(1):63–78. doi: 10.1007/s13280-023-01914-4 (PMC10692041; doi:10.1007/s13280-023-01914-4)
Supplement: Supplementary file 6 — Supplementary file6 (XLSX 14 kb) [file 13280_2023_1914_MOESM6_ESM.xlsx]

## Sheet: Sheet1
Dataset name	use	source	citation (if provided)
Population density	Human footprint map	ftp://ftp.worldpop.org.uk/GIS/Population/Global_2000_2020/2020/0_Mosaicked/ppp_2020_1km_Aggregated.tif	WorldPop (www.worldpop.org - School of Geography and Environmental Science, University of Southampton; Department of Geography and Geosciences, University of Louisville; Departement de Geographie, Universite de Namur) and Center for International Earth Science Information Network (CIESIN), Columbia University (2018). Global High Resolution Population Denominators Project - Funded by The Bill and …
Roads	Human footprint map	https://www.globio.info/download-grip-dataset	Meijer, J. R., Huijbregts, M. A. J., Schotten, K. C. G. J. & Schipper, A. M. Global patterns of current and future road infrastructure. Environ. Res. Lett. 13, 064006 (2018)
Railways	Human footprint map	https://geonode.wfp.org/layers/geonode%3Awld_trs_railways_wfp	World Food Programme (WFP). Global Railways. (2017)
Lights at night	Human footprint map	https://ladsweb.modaps.eosdis.nasa.gov/missions-and-measurements/science-domain/nighttime-lights/	NASA Earth Observatory. Night Lights 2020 Map. (2020)
Crops	Human footprint map	https://croplands.org/gfsadce30info	Teluguntla, P. G. et al. Global Cropland Area Database (GCAD) derived from Remote Sensing in Support of Food Security in the Twenty-first Century: Current Achievements and Future Possibilities. in Land resources: monitoring, modelling, and mapping (Taylor & Francis, 2015).
Pasture	Human footprint map	https://www.nature.com/articles/sdata201667#Sec15	Venter, O. et al. Global terrestrial Human Footprint maps for 1993 and 2009. Sci Data 3, 160067 (2016).
Dams	Human footprint map	http://globaldamwatch.org/data/	Scientific Data Curation Team. Metadata record for: GOODD, a global dataset of more than 38,000 georeferenced dams. 5796 Bytes (2020) doi:10.6084/M9.FIGSHARE.10538486.
Pipelines	Human footprint map	http://worldmap.harvard.edu/data/geonode:global_oil_pipelines_7z9	Blossom, J. Global Oil Pipelines. (2009)
Mining sites	Human footprint map	https://conbio.onlinelibrary.wiley.com/doi/full/10.1111/cobi.13317	Hughes, A. C. Understanding and minimizing environmental impacts of the Belt and Road Initiative. Conservation Biology 33, 883–894 (2019).
Petrochemical areas	Human footprint map	http://worldmap.harvard.edu/data/geonode:location_of_the_worlds_petroleum_fields__xtl	Lujala, P., Ketil Rod, J. & Thieme, N. Fighting over Oil: Introducing a New Dataset. Conflict Management and Peace Science 24, 239–256 (2007).
NDVI	Priority mapping	https://land.copernicus.vgt.vito.be/PDF/portal/Application.html#Home	Copernicus Global Land Service. Copernicus https://land.copernicus.vgt.vito.be/PDF/portal/Application.html#Home
Global Biome map	Biome analysis	https://ecoregions.appspot.com/)	Dinerstein, E. et al. An Ecoregion-Based Approach to Protecting Half the Terrestrial Realm. BioScience 67, 534–545 (2017)
World country map	National level analysis	https://thematicmapping.org/downloads/world_borders.php
Protected areas	Protected priority analysis	https://www.iucn.org/theme/protected-areas/our-work/world-database-protected-areas	UNEP-WCMC and IUCN. Protected Planet: The World Database on Protected Areas (WDPA) and World Database on Other Effective Area-based Conservation Measures (WD-OECM)) [Online]. (2021)
Key Biodiversity areas	Testing priorities	http://www.keybiodiversityareas.org/
Forests	Biome analysis	https://elischolar.library.yale.edu/yale_fes_data/1/	Crowther, T. W. et al. Mapping tree density at a global scale. Nature 525, 201–205 (2015).
Forests	Biome analysis	https://www.nature.com/articles/s41586-018-0411-9?	Song, X.-P. et al. Global land change from 1982 to 2016. Nature 560, 639–643 (2018).
Mangroves	Biome analysis	10.17528/cifor/data.00058.	T., G. et al. Tropical and Subtropical Wetlands Distribution version 2. doi:10.17528/cifor/data.00058.
Freshwater	Biome analysis	http://hydro.iis.u-tokyo.ac.jp/~yamadai/MERIT_DEM/	Yamazaki, D. et al. A high-accuracy map of global terrain elevations: Accurate Global Terrain Elevation map. Geophys. Res. Lett. 44, 5844–5853 (2017).
Deforestation data	Complementary analysis	https://www.globalforestwatch.org/
International Debt Statistics 2021	Public external debt to indivicual creditors in 67 DSSI eligible countries	https://datatopics.worldbank.org/debt/ids/
World Bank Open Data	GDP data in 2019 for 66 countries except Somalia	https://data.worldbank.org/indicator/NY.GDP.MKTP.CD
World Economic Outlook Database	GDP data in 2019 for Somalia	https://www.imf.org/en/Publications/WEO/weo-database/2021/April
A Global Review of Protected Area Budgets and Staff	Assumed acquisition cost of protected area	https://www.unep-wcmc.org/resources-and-data/a-global-review-of-protected-area-budgets-and-staff	James, A. N., Green, M. J. B. & Paine, J. R. The global review of protected area budgets and staff. (World Conservation Press, 1999).
