# Supplementary material for: Are debt-for-nature swaps scalable: Which nature, how much debt, and who pays?
Source: Ambio. 2023 Sep 2;53(1):63–78. doi: 10.1007/s13280-023-01914-4 (PMC10692041; doi:10.1007/s13280-023-01914-4)
Supplement: Supplementary file 7 — Supplementary file7 (XLSX 568 kb) [file 13280_2023_1914_MOESM7_ESM.xlsx]

## Sheet: 14-19 （52）
Debtor	Code	IncomeGroup	Creditor Type	Creditor	Year	Debt Oustanding
Angola	AGO	Lower middle income	Total Official multilateral		2014	2.06131e+06
Angola	AGO	Lower middle income	Total Official multilateral		2015	2.13441e+06
Angola	AGO	Lower middle income	Total Official multilateral		2016	2.4143e+06
Angola	AGO	Lower middle income	Total Official multilateral		2017	2.62779e+06
Angola	AGO	Lower middle income	Total Official multilateral		2018	3.64256e+06
Angola	AGO	Lower middle income	Total Official multilateral		2019	4708575
Angola	AGO	Lower middle income	Official multilateral	African Dev. Bank	2014	648358
Angola	AGO	Lower middle income	Official multilateral	African Dev. Bank	2015	653391
Angola	AGO	Lower middle income	Official multilateral	African Dev. Bank	2016	1.05964e+06
Angola	AGO	Lower middle income	Official multilateral	African Dev. Bank	2017	1.19583e+06
Angola	AGO	Lower middle income	Official multilateral	African Dev. Bank	2018	1.20929e+06
Angola	AGO	Lower middle income	Official multilateral	African Dev. Bank	2019	1196016
Angola	AGO	Lower middle income	Official multilateral	Asian Dev. Bank	2014	0
Angola	AGO	Lower middle income	Official multilateral	Asian Dev. Bank	2015	0
Angola	AGO	Lower middle income	Official multilateral	Asian Dev. Bank	2016	0
Angola	AGO	Lower middle income	Official multilateral	Asian Dev. Bank	2017	0
Angola	AGO	Lower middle income	Official multilateral	Asian Dev. Bank	2018	0
Angola	AGO	Lower middle income	Official multilateral	Asian Dev. Bank	2019	0
Angola	AGO	Lower middle income	Official multilateral	Inter-American Dev. Bank	2014	0
Angola	AGO	Lower middle income	Official multilateral	Inter-American Dev. Bank	2015	0
Angola	AGO	Lower middle income	Official multilateral	Inter-American Dev. Bank	2016	0
Angola	AGO	Lower middle income	Official multilateral	Inter-American Dev. Bank	2017	0
Angola	AGO	Lower middle income	Official multilateral	Inter-American Dev. Bank	2018	0
Angola	AGO	Lower middle income	Official multilateral	Inter-American Dev. Bank	2019	0
Angola	AGO	Lower middle income	Official multilateral	International Monetary Fund	2014	914031
Angola	AGO	Lower middle income	Official multilateral	International Monetary Fund	2015	532051
Angola	AGO	Lower middle income	Official multilateral	International Monetary Fund	2016	395882
Angola	AGO	Lower middle income	Official multilateral	International Monetary Fund	2017	388801
Angola	AGO	Lower middle income	Official multilateral	International Monetary Fund	2018	1.37411e+06
Angola	AGO	Lower middle income	Official multilateral	International Monetary Fund	2019	1861296
Angola	AGO	Lower middle income	Official multilateral	World Bank-IBRD	2014	0
Angola	AGO	Lower middle income	Official multilateral	World Bank-IBRD	2015	450000
Angola	AGO	Lower middle income	Official multilateral	World Bank-IBRD	2016	450000
Angola	AGO	Lower middle income	Official multilateral	World Bank-IBRD	2017	464640
Angola	AGO	Lower middle income	Official multilateral	World Bank-IBRD	2018	496387
Angola	AGO	Lower middle income	Official multilateral	World Bank-IBRD	2019	1109047
Angola	AGO	Lower middle income	Official multilateral	World Bank-IDA	2014	477956
Angola	AGO	Lower middle income	Official multilateral	World Bank-IDA	2015	479183
Angola	AGO	Lower middle income	Official multilateral	World Bank-IDA	2016	490247
Angola	AGO	Lower middle income	Official multilateral	World Bank-IDA	2017	560256
Angola	AGO	Lower middle income	Official multilateral	World Bank-IDA	2018	545941
Angola	AGO	Lower middle income	Official multilateral	World Bank-IDA	2019	526778
Angola	AGO	Lower middle income	Official multilateral	Other multilateral	2014	20960.3
Angola	AGO	Lower middle income	Official multilateral	Other multilateral	2015	19783.8
Angola	AGO	Lower middle income	Official multilateral	Other multilateral	2016	18531.6
Angola	AGO	Lower middle income	Official multilateral	Other multilateral	2017	18257.9
Angola	AGO	Lower middle income	Official multilateral	Other multilateral	2018	16819.8
Angola	AGO	Lower middle income	Official multilateral	Other multilateral	2019	15438
Angola	AGO	Lower middle income	Total Official bilateral		2014	1.12293e+07
Angola	AGO	Lower middle income	Total Official bilateral		2015	1.03083e+07
Angola	AGO	Lower middle income	Total Official bilateral		2016	1.96634e+07
Angola	AGO	Lower middle income	Total Official bilateral		2017	2.15601e+07
Angola	AGO	Lower middle income	Total Official bilateral		2018	2.01038e+07
Angola	AGO	Lower middle income	Total Official bilateral		2019	16541176
Angola	AGO	Lower middle income	Official bilateral	Belgium	2014	1041.7
Angola	AGO	Lower middle income	Official bilateral	Belgium	2015	754.47
Angola	AGO	Lower middle income	Official bilateral	Belgium	2016	562.89
Angola	AGO	Lower middle income	Official bilateral	Belgium	2017	450.94
Angola	AGO	Lower middle income	Official bilateral	Belgium	2018	248.47
Angola	AGO	Lower middle income	Official bilateral	Belgium	2019	66
Angola	AGO	Lower middle income	Official bilateral	Brazil	2014	1737050
Angola	AGO	Lower middle income	Official bilateral	Brazil	2015	1414868
Angola	AGO	Lower middle income	Official bilateral	Brazil	2016	1185632
Angola	AGO	Lower middle income	Official bilateral	Brazil	2017	1.05895e+06
Angola	AGO	Lower middle income	Official bilateral	Brazil	2018	807118
Angola	AGO	Lower middle income	Official bilateral	Brazil	2019	0
Angola	AGO	Lower middle income	Official bilateral	Canada	2014	0
Angola	AGO	Lower middle income	Official bilateral	Canada	2015	0
Angola	AGO	Lower middle income	Official bilateral	Canada	2016	183390
Angola	AGO	Lower middle income	Official bilateral	Canada	2017	304955
Angola	AGO	Lower middle income	Official bilateral	Canada	2018	290810
Angola	AGO	Lower middle income	Official bilateral	Canada	2019	346146
Angola	AGO	Lower middle income	Official bilateral	China	2014	8029783
Angola	AGO	Lower middle income	Official bilateral	China	2015	7365002
Angola	AGO	Lower middle income	Official bilateral	China	2016	16841500
Angola	AGO	Lower middle income	Official bilateral	China	2017	18851506
Angola	AGO	Lower middle income	Official bilateral	China	2018	17723740
Angola	AGO	Lower middle income	Official bilateral	China	2019	15047785
Angola	AGO	Lower middle income	Official bilateral	India	2014	50425
Angola	AGO	Lower middle income	Official bilateral	India	2015	47844
Angola	AGO	Lower middle income	Official bilateral	India	2016	58398
Angola	AGO	Lower middle income	Official bilateral	India	2017	54161
Angola	AGO	Lower middle income	Official bilateral	India	2018	43237
Angola	AGO	Lower middle income	Official bilateral	India	2019	36402
Angola	AGO	Lower middle income	Official bilateral	Italy	2014	20384.7
Angola	AGO	Lower middle income	Official bilateral	Italy	2015	18279.3
Angola	AGO	Lower middle income	Official bilateral	Italy	2016	17698.3
Angola	AGO	Lower middle income	Official bilateral	Italy	2017	20136.2
Angola	AGO	Lower middle income	Official bilateral	Italy	2018	19224.6
Angola	AGO	Lower middle income	Official bilateral	Italy	2019	18862
Angola	AGO	Lower middle income	Official bilateral	Japan	2014	631822
Angola	AGO	Lower middle income	Official bilateral	Japan	2015	743594
Angola	AGO	Lower middle income	Official bilateral	Japan	2016	698012
Angola	AGO	Lower middle income	Official bilateral	Japan	2017	639804
Angola	AGO	Lower middle income	Official bilateral	Japan	2018	553719
Angola	AGO	Lower middle income	Official bilateral	Japan	2019	468515
Angola	AGO	Lower middle income	Official bilateral	Netherlands	2014	6730.97
Angola	AGO	Lower middle income	Official bilateral	Netherlands	2015	4920.92
Angola	AGO	Lower middle income	Official bilateral	Netherlands	2016	3658.78
Angola	AGO	Lower middle income	Official bilateral	Netherlands	2017	3819.77
Angola	AGO	Lower middle income	Official bilateral	Netherlands	2018	3343.4
Angola	AGO	Lower middle income	Official bilateral	Netherlands	2019	2982
Angola	AGO	Lower middle income	Official bilateral	Portugal	2014	530654
Angola	AGO	Lower middle income	Official bilateral	Portugal	2015	502739
Angola	AGO	Lower middle income	Official bilateral	Portugal	2016	474825
Angola	AGO	Lower middle income	Official bilateral	Portugal	2017	446842
Angola	AGO	Lower middle income	Official bilateral	Portugal	2018	418928
Angola	AGO	Lower middle income	Official bilateral	Portugal	2019	391014
Angola	AGO	Lower middle income	Official bilateral	Spain	2014	67942
Angola	AGO	Lower middle income	Official bilateral	Spain	2015	61101
Angola	AGO	Lower middle income	Official bilateral	Spain	2016	54958
Angola	AGO	Lower middle income	Official bilateral	Spain	2017	49189.4
Angola	AGO	Lower middle income	Official bilateral	Spain	2018	43269
Angola	AGO	Lower middle income	Official bilateral	Spain	2019	37595
Angola	AGO	Lower middle income	Official bilateral	United States	2014	25089
Angola	AGO	Lower middle income	Official bilateral	United States	2015	22843
Angola	AGO	Lower middle income	Official bilateral	United States	2016	20857
Angola	AGO	Lower middle income	Official bilateral	United States	2017	18872.6
Angola	AGO	Lower middle income	Official bilateral	United States	2018	16544
Angola	AGO	Lower middle income	Official bilateral	United States	2019	0
Angola	AGO	Lower middle income	Official bilateral	Other bilateral	2014	128423
Angola	AGO	Lower middle income	Official bilateral	Other bilateral	2015	126354
Angola	AGO	Lower middle income	Official bilateral	Other bilateral	2016	123927
Angola	AGO	Lower middle income	Official bilateral	Other bilateral	2017	111435
Angola	AGO	Lower middle income	Official bilateral	Other bilateral	2018	183603
Angola	AGO	Lower middle income	Official bilateral	Other bilateral	2019	13130
Angola	AGO	Lower middle income	Total Non-official		2014	1.44449e+07
Angola	AGO	Lower middle income	Total Non-official		2015	1.28882e+07
Angola	AGO	Lower middle income	Total Non-official		2016	1.06281e+07
Angola	AGO	Lower middle income	Total Non-official		2017	9.30023e+06
Angola	AGO	Lower middle income	Total Non-official		2018	9.72094e+06
Angola	AGO	Lower middle income	Total Non-official		2019	7642791
Angola	AGO	Lower middle income	Non-official	Belgium	2014	146577
Angola	AGO	Lower middle income	Non-official	Belgium	2015	87502.1
Angola	AGO	Lower middle income	Non-official	Belgium	2016	44368.1
Angola	AGO	Lower middle income	Non-official	Belgium	2017	57896.2
Angola	AGO	Lower middle income	Non-official	Belgium	2018	42597.4
Angola	AGO	Lower middle income	Non-official	Belgium	2019	37502
Angola	AGO	Lower middle income	Non-official	Brazil	2014	137991
Angola	AGO	Lower middle income	Non-official	Brazil	2015	70828
Angola	AGO	Lower middle income	Non-official	Brazil	2016	45682
Angola	AGO	Lower middle income	Non-official	Brazil	2017	21145
Angola	AGO	Lower middle income	Non-official	Brazil	2018	10702
Angola	AGO	Lower middle income	Non-official	Brazil	2019	0
Angola	AGO	Lower middle income	Non-official	Canada	2014	245085
Angola	AGO	Lower middle income	Non-official	Canada	2015	267284
Angola	AGO	Lower middle income	Non-official	Canada	2016	217508
Angola	AGO	Lower middle income	Non-official	Canada	2017	184884
Angola	AGO	Lower middle income	Non-official	Canada	2018	154065
Angola	AGO	Lower middle income	Non-official	Canada	2019	121975
Angola	AGO	Lower middle income	Non-official	China	2014	1253855
Angola	AGO	Lower middle income	Non-official	China	2015	1424287
Angola	AGO	Lower middle income	Non-official	China	2016	782151
Angola	AGO	Lower middle income	Non-official	China	2017	541165
Angola	AGO	Lower middle income	Non-official	China	2018	1527756
Angola	AGO	Lower middle income	Non-official	China	2019	676905
Angola	AGO	Lower middle income	Non-official	France	2014	80280.2
Angola	AGO	Lower middle income	Non-official	France	2015	64687.6
Angola	AGO	Lower middle income	Non-official	France	2016	109631
Angola	AGO	Lower middle income	Non-official	France	2017	151574
Angola	AGO	Lower middle income	Non-official	France	2018	144490
Angola	AGO	Lower middle income	Non-official	France	2019	135948
Angola	AGO	Lower middle income	Non-official	Germany	2014	94738.6
Angola	AGO	Lower middle income	Non-official	Germany	2015	69530.9
Angola	AGO	Lower middle income	Non-official	Germany	2016	53557.8
Angola	AGO	Lower middle income	Non-official	Germany	2017	128670
Angola	AGO	Lower middle income	Non-official	Germany	2018	105775
Angola	AGO	Lower middle income	Non-official	Germany	2019	69818
Angola	AGO	Lower middle income	Non-official	Ireland	2014	0
Angola	AGO	Lower middle income	Non-official	Ireland	2015	0
Angola	AGO	Lower middle income	Non-official	Ireland	2016	0
Angola	AGO	Lower middle income	Non-official	Ireland	2017	0
Angola	AGO	Lower middle income	Non-official	Ireland	2018	280145
Angola	AGO	Lower middle income	Non-official	Ireland	2019	206691
Angola	AGO	Lower middle income	Non-official	Israel	2014	395235
Angola	AGO	Lower middle income	Non-official	Israel	2015	255182
Angola	AGO	Lower middle income	Non-official	Israel	2016	742135
Angola	AGO	Lower middle income	Non-official	Israel	2017	742135
Angola	AGO	Lower middle income	Non-official	Israel	2018	545122
Angola	AGO	Lower middle income	Non-official	Israel	2019	500671
Angola	AGO	Lower middle income	Non-official	Italy	2014	0
Angola	AGO	Lower middle income	Non-official	Italy	2015	0
Angola	AGO	Lower middle income	Non-official	Italy	2016	0
Angola	AGO	Lower middle income	Non-official	Italy	2017	101677
Angola	AGO	Lower middle income	Non-official	Italy	2018	87246.7
Angola	AGO	Lower middle income	Non-official	Italy	2019	75844
Angola	AGO	Lower middle income	Non-official	Luxembourg	2014	102529
Angola	AGO	Lower middle income	Non-official	Luxembourg	2015	93656.5
Angola	AGO	Lower middle income	Non-official	Luxembourg	2016	91208.6
Angola	AGO	Lower middle income	Non-official	Luxembourg	2017	1039
Angola	AGO	Lower middle income	Non-official	Luxembourg	2018	1039
Angola	AGO	Lower middle income	Non-official	Luxembourg	2019	0
Angola	AGO	Lower middle income	Non-official	Netherlands	2014	109055
Angola	AGO	Lower middle income	Non-official	Netherlands	2015	361627
Angola	AGO	Lower middle income	Non-official	Netherlands	2016	349203
Angola	AGO	Lower middle income	Non-official	Netherlands	2017	327209
Angola	AGO	Lower middle income	Non-official	Netherlands	2018	364402
Angola	AGO	Lower middle income	Non-official	Netherlands	2019	351061
Angola	AGO	Lower middle income	Non-official	Portugal	2014	590929
Angola	AGO	Lower middle income	Non-official	Portugal	2015	423590
Angola	AGO	Lower middle income	Non-official	Portugal	2016	330825
Angola	AGO	Lower middle income	Non-official	Portugal	2017	327352
Angola	AGO	Lower middle income	Non-official	Portugal	2018	376506
Angola	AGO	Lower middle income	Non-official	Portugal	2019	322676
Angola	AGO	Lower middle income	Non-official	Spain	2014	673271
Angola	AGO	Lower middle income	Non-official	Spain	2015	683046
Angola	AGO	Lower middle income	Non-official	Spain	2016	853246
Angola	AGO	Lower middle income	Non-official	Spain	2017	1.06374e+06
Angola	AGO	Lower middle income	Non-official	Spain	2018	829661
Angola	AGO	Lower middle income	Non-official	Spain	2019	0
Angola	AGO	Lower middle income	Non-official	United Kingdom	2014	10302742
Angola	AGO	Lower middle income	Non-official	United Kingdom	2015	8795018
Angola	AGO	Lower middle income	Non-official	United Kingdom	2016	6.99109e+06
Angola	AGO	Lower middle income	Non-official	United Kingdom	2017	4.99633e+06
Angola	AGO	Lower middle income	Non-official	United Kingdom	2018	4.5496e+06
Angola	AGO	Lower middle income	Non-official	United Kingdom	2019	698880
Angola	AGO	Lower middle income	Non-official	United States	2014	312652
Angola	AGO	Lower middle income	Non-official	United States	2015	291982
Angola	AGO	Lower middle income	Non-official	United States	2016	17541
Angola	AGO	Lower middle income	Non-official	United States	2017	655417
Angola	AGO	Lower middle income	Non-official	United States	2018	701833
Angola	AGO	Lower middle income	Non-official	United States	2019	0
Angola	AGO	Lower middle income	Total Bondholders		2014	1000000
Angola	AGO	Lower middle income	Total Bondholders		2015	2500000
Angola	AGO	Lower middle income	Total Bondholders		2016	2500000
Angola	AGO	Lower middle income	Total Bondholders		2017	2500000
Angola	AGO	Lower middle income	Total Bondholders		2018	6000000
Angola	AGO	Lower middle income	Total Bondholders		2019	3982630
Angola	AGO	Lower middle income	Bondholders	Bond market	2014	1000000
Angola	AGO	Lower middle income	Bondholders	Bond market	2015	2500000
Angola	AGO	Lower middle income	Bondholders	Bond market	2016	2500000
Angola	AGO	Lower middle income	Bondholders	Bond market	2017	2500000
Angola	AGO	Lower middle income	Bondholders	Bond market	2018	6000000
Angola	AGO	Lower middle income	Bondholders	Bond market	2019	462190
Angola	AGO	Lower middle income	Total		2014	2.87356e+07
Angola	AGO	Lower middle income	Total		2015	2.78309e+07
Angola	AGO	Lower middle income	Total		2016	3.52059e+07
Angola	AGO	Lower middle income	Total		2017	3.59881e+07
Angola	AGO	Lower middle income	Total		2018	3.94673e+07
Angola	AGO	Lower middle income	Total		2019	35031246
Bangladesh	BGD	Lower middle income	Total Official multilateral		2014	2.12332e+07
Bangladesh	BGD	Lower middle income	Total Official multilateral		2015	2.16295e+07
Bangladesh	BGD	Lower middle income	Total Official multilateral		2016	2.23926e+07
Bangladesh	BGD	Lower middle income	Total Official multilateral		2017	2.51441e+07
Bangladesh	BGD	Lower middle income	Total Official multilateral		2018	2.65057e+07
Bangladesh	BGD	Lower middle income	Total Official multilateral		2019	28571526
Bangladesh	BGD	Lower middle income	Official multilateral	African Dev. Bank	2014	0
Bangladesh	BGD	Lower middle income	Official multilateral	African Dev. Bank	2015	0
Bangladesh	BGD	Lower middle income	Official multilateral	African Dev. Bank	2016	0
Bangladesh	BGD	Lower middle income	Official multilateral	African Dev. Bank	2017	0
Bangladesh	BGD	Lower middle income	Official multilateral	African Dev. Bank	2018	0
Bangladesh	BGD	Lower middle income	Official multilateral	African Dev. Bank	2019	0
Bangladesh	BGD	Lower middle income	Official multilateral	Asian Dev. Bank	2014	7525449
Bangladesh	BGD	Lower middle income	Official multilateral	Asian Dev. Bank	2015	7615095
Bangladesh	BGD	Lower middle income	Official multilateral	Asian Dev. Bank	2016	7909002
Bangladesh	BGD	Lower middle income	Official multilateral	Asian Dev. Bank	2017	8685378
Bangladesh	BGD	Lower middle income	Official multilateral	Asian Dev. Bank	2018	9169504
Bangladesh	BGD	Lower middle income	Official multilateral	Asian Dev. Bank	2019	9950834
Bangladesh	BGD	Lower middle income	Official multilateral	Inter-American Dev. Bank	2014	0
Bangladesh	BGD	Lower middle income	Official multilateral	Inter-American Dev. Bank	2015	0
Bangladesh	BGD	Lower middle income	Official multilateral	Inter-American Dev. Bank	2016	0
Bangladesh	BGD	Lower middle income	Official multilateral	Inter-American Dev. Bank	2017	0
Bangladesh	BGD	Lower middle income	Official multilateral	Inter-American Dev. Bank	2018	0
Bangladesh	BGD	Lower middle income	Official multilateral	Inter-American Dev. Bank	2019	0
Bangladesh	BGD	Lower middle income	Official multilateral	International Monetary Fund	2014	1.47e+06
Bangladesh	BGD	Lower middle income	Official multilateral	International Monetary Fund	2015	1.61275e+06
Bangladesh	BGD	Lower middle income	Official multilateral	International Monetary Fund	2016	1.54647e+06
Bangladesh	BGD	Lower middle income	Official multilateral	International Monetary Fund	2017	1.62525e+06
Bangladesh	BGD	Lower middle income	Official multilateral	International Monetary Fund	2018	1.53634e+06
Bangladesh	BGD	Lower middle income	Official multilateral	International Monetary Fund	2019	1413764
Bangladesh	BGD	Lower middle income	Official multilateral	World Bank-IBRD	2014	0
Bangladesh	BGD	Lower middle income	Official multilateral	World Bank-IBRD	2015	0
Bangladesh	BGD	Lower middle income	Official multilateral	World Bank-IBRD	2016	0
Bangladesh	BGD	Lower middle income	Official multilateral	World Bank-IBRD	2017	0
Bangladesh	BGD	Lower middle income	Official multilateral	World Bank-IBRD	2018	0
Bangladesh	BGD	Lower middle income	Official multilateral	World Bank-IBRD	2019	0
Bangladesh	BGD	Lower middle income	Official multilateral	World Bank-IDA	2014	11417309
Bangladesh	BGD	Lower middle income	Official multilateral	World Bank-IDA	2015	11533583
Bangladesh	BGD	Lower middle income	Official multilateral	World Bank-IDA	2016	11890490
Bangladesh	BGD	Lower middle income	Official multilateral	World Bank-IDA	2017	13620791
Bangladesh	BGD	Lower middle income	Official multilateral	World Bank-IDA	2018	14501231
Bangladesh	BGD	Lower middle income	Official multilateral	World Bank-IDA	2019	15788308
Bangladesh	BGD	Lower middle income	Official multilateral	Other multilateral	2014	820471
Bangladesh	BGD	Lower middle income	Official multilateral	Other multilateral	2015	868117
Bangladesh	BGD	Lower middle income	Official multilateral	Other multilateral	2016	1.04668e+06
Bangladesh	BGD	Lower middle income	Official multilateral	Other multilateral	2017	1.21267e+06
Bangladesh	BGD	Lower middle income	Official multilateral	Other multilateral	2018	1.29861e+06
Bangladesh	BGD	Lower middle income	Official multilateral	Other multilateral	2019	1418620
Bangladesh	BGD	Lower middle income	Total Official bilateral		2014	4.45658e+06
Bangladesh	BGD	Lower middle income	Total Official bilateral		2015	4.65573e+06
Bangladesh	BGD	Lower middle income	Total Official bilateral		2016	5.46424e+06
Bangladesh	BGD	Lower middle income	Total Official bilateral		2017	7.81742e+06
Bangladesh	BGD	Lower middle income	Total Official bilateral		2018	1.16664e+07
Bangladesh	BGD	Lower middle income	Total Official bilateral		2019	13860204
Bangladesh	BGD	Lower middle income	Official bilateral	Belgium	2014	2905.34
Bangladesh	BGD	Lower middle income	Official bilateral	Belgium	2015	1495.87
Bangladesh	BGD	Lower middle income	Official bilateral	Belgium	2016	962.39
Bangladesh	BGD	Lower middle income	Official bilateral	Belgium	2017	743.57
Bangladesh	BGD	Lower middle income	Official bilateral	Belgium	2018	567.92
Bangladesh	BGD	Lower middle income	Official bilateral	Belgium	2019	418
Bangladesh	BGD	Lower middle income	Official bilateral	China	2014	923141
Bangladesh	BGD	Lower middle income	Official bilateral	China	2015	944536
Bangladesh	BGD	Lower middle income	Official bilateral	China	2016	990683
Bangladesh	BGD	Lower middle income	Official bilateral	China	2017	1.36642e+06
Bangladesh	BGD	Lower middle income	Official bilateral	China	2018	3108080
Bangladesh	BGD	Lower middle income	Official bilateral	China	2019	3599643
Bangladesh	BGD	Lower middle income	Official bilateral	France	2014	48424.2
Bangladesh	BGD	Lower middle income	Official bilateral	France	2015	38317.8
Bangladesh	BGD	Lower middle income	Official bilateral	France	2016	43973.7
Bangladesh	BGD	Lower middle income	Official bilateral	France	2017	68184.7
Bangladesh	BGD	Lower middle income	Official bilateral	France	2018	105002
Bangladesh	BGD	Lower middle income	Official bilateral	France	2019	147819
Bangladesh	BGD	Lower middle income	Official bilateral	Germany	2014	0
Bangladesh	BGD	Lower middle income	Official bilateral	Germany	2015	0
Bangladesh	BGD	Lower middle income	Official bilateral	Germany	2016	0
Bangladesh	BGD	Lower middle income	Official bilateral	Germany	2017	0
Bangladesh	BGD	Lower middle income	Official bilateral	Germany	2018	7578.76
Bangladesh	BGD	Lower middle income	Official bilateral	Germany	2019	22411
Bangladesh	BGD	Lower middle income	Official bilateral	India	2014	349740
Bangladesh	BGD	Lower middle income	Official bilateral	India	2015	233079
Bangladesh	BGD	Lower middle income	Official bilateral	India	2016	326062
Bangladesh	BGD	Lower middle income	Official bilateral	India	2017	327013
Bangladesh	BGD	Lower middle income	Official bilateral	India	2018	362189
Bangladesh	BGD	Lower middle income	Official bilateral	India	2019	530262
Bangladesh	BGD	Lower middle income	Official bilateral	Japan	2014	2115426
Bangladesh	BGD	Lower middle income	Official bilateral	Japan	2015	2.47271e+06
Bangladesh	BGD	Lower middle income	Official bilateral	Japan	2016	2922971
Bangladesh	BGD	Lower middle income	Official bilateral	Japan	2017	4.2378e+06
Bangladesh	BGD	Lower middle income	Official bilateral	Japan	2018	5.3515e+06
Bangladesh	BGD	Lower middle income	Official bilateral	Japan	2019	6227868
Bangladesh	BGD	Lower middle income	Official bilateral	Kuwait	2014	131964
Bangladesh	BGD	Lower middle income	Official bilateral	Kuwait	2015	119167
Bangladesh	BGD	Lower middle income	Official bilateral	Kuwait	2016	140314
Bangladesh	BGD	Lower middle income	Official bilateral	Kuwait	2017	145893
Bangladesh	BGD	Lower middle income	Official bilateral	Kuwait	2018	152403
Bangladesh	BGD	Lower middle income	Official bilateral	Kuwait	2019	157495
Bangladesh	BGD	Lower middle income	Official bilateral	Saudi Arabia	2014	20841.3
Bangladesh	BGD	Lower middle income	Official bilateral	Saudi Arabia	2015	19895.5
Bangladesh	BGD	Lower middle income	Official bilateral	Saudi Arabia	2016	78595.7
Bangladesh	BGD	Lower middle income	Official bilateral	Saudi Arabia	2017	102275
Bangladesh	BGD	Lower middle income	Official bilateral	Saudi Arabia	2018	106793
Bangladesh	BGD	Lower middle income	Official bilateral	Saudi Arabia	2019	119483
Bangladesh	BGD	Lower middle income	Official bilateral	Spain	2014	3592
Bangladesh	BGD	Lower middle income	Official bilateral	Spain	2015	3142
Bangladesh	BGD	Lower middle income	Official bilateral	Spain	2016	2693
Bangladesh	BGD	Lower middle income	Official bilateral	Spain	2017	2020
Bangladesh	BGD	Lower middle income	Official bilateral	Spain	2018	1795
Bangladesh	BGD	Lower middle income	Official bilateral	Spain	2019	1122
Bangladesh	BGD	Lower middle income	Official bilateral	Switzerland	2014	4017.79
Bangladesh	BGD	Lower middle income	Official bilateral	Switzerland	2015	3658.91
Bangladesh	BGD	Lower middle income	Official bilateral	Switzerland	2016	3228.35
Bangladesh	BGD	Lower middle income	Official bilateral	Switzerland	2017	2965.24
Bangladesh	BGD	Lower middle income	Official bilateral	Switzerland	2018	2516.5
Bangladesh	BGD	Lower middle income	Official bilateral	Switzerland	2019	78
Bangladesh	BGD	Lower middle income	Official bilateral	United Arab Emirates	2014	3630.5
Bangladesh	BGD	Lower middle income	Official bilateral	United Arab Emirates	2015	3630.5
Bangladesh	BGD	Lower middle income	Official bilateral	United Arab Emirates	2016	36781.5
Bangladesh	BGD	Lower middle income	Official bilateral	United Arab Emirates	2017	41169
Bangladesh	BGD	Lower middle income	Official bilateral	United Arab Emirates	2018	52502.9
Bangladesh	BGD	Lower middle income	Official bilateral	United Arab Emirates	2019	48035
Bangladesh	BGD	Lower middle income	Official bilateral	United States	2014	132808
Bangladesh	BGD	Lower middle income	Official bilateral	United States	2015	102547
Bangladesh	BGD	Lower middle income	Official bilateral	United States	2016	76872
Bangladesh	BGD	Lower middle income	Official bilateral	United States	2017	58142
Bangladesh	BGD	Lower middle income	Official bilateral	United States	2018	44040
Bangladesh	BGD	Lower middle income	Official bilateral	United States	2019	324
Bangladesh	BGD	Lower middle income	Official bilateral	Other bilateral	2014	720090
Bangladesh	BGD	Lower middle income	Official bilateral	Other bilateral	2015	713554
Bangladesh	BGD	Lower middle income	Official bilateral	Other bilateral	2016	841107
Bangladesh	BGD	Lower middle income	Official bilateral	Other bilateral	2017	1.46479e+06
Bangladesh	BGD	Lower middle income	Official bilateral	Other bilateral	2018	2.37143e+06
Bangladesh	BGD	Lower middle income	Official bilateral	Other bilateral	2019	514976
Bangladesh	BGD	Lower middle income	Total Non-official		2014	49238.3
Bangladesh	BGD	Lower middle income	Total Non-official		2015	40003.3
Bangladesh	BGD	Lower middle income	Total Non-official		2016	33917.1
Bangladesh	BGD	Lower middle income	Total Non-official		2017	32658.9
Bangladesh	BGD	Lower middle income	Total Non-official		2018	26033.4
Bangladesh	BGD	Lower middle income	Total Non-official		2019	18618
Bangladesh	BGD	Lower middle income	Non-official	China	2014	10103
Bangladesh	BGD	Lower middle income	Non-official	China	2015	8419
Bangladesh	BGD	Lower middle income	Non-official	China	2016	6735
Bangladesh	BGD	Lower middle income	Non-official	China	2017	5051
Bangladesh	BGD	Lower middle income	Non-official	China	2018	3367
Bangladesh	BGD	Lower middle income	Non-official	China	2019	0
Bangladesh	BGD	Lower middle income	Non-official	Denmark	2014	39135.3
Bangladesh	BGD	Lower middle income	Non-official	Denmark	2015	31584.3
Bangladesh	BGD	Lower middle income	Non-official	Denmark	2016	27182.1
Bangladesh	BGD	Lower middle income	Non-official	Denmark	2017	27607.9
Bangladesh	BGD	Lower middle income	Non-official	Denmark	2018	22666.4
Bangladesh	BGD	Lower middle income	Non-official	Denmark	2019	18618
Bangladesh	BGD	Lower middle income	Total Bondholders		2014	0
Bangladesh	BGD	Lower middle income	Total Bondholders		2015	0
Bangladesh	BGD	Lower middle income	Total Bondholders		2016	0
Bangladesh	BGD	Lower middle income	Total Bondholders		2017	0
Bangladesh	BGD	Lower middle income	Total Bondholders		2018	0
Bangladesh	BGD	Lower middle income	Total Bondholders		2019	0
Bangladesh	BGD	Lower middle income	Total		2014	2.5739e+07
Bangladesh	BGD	Lower middle income	Total		2015	2.63253e+07
Bangladesh	BGD	Lower middle income	Total		2016	2.78908e+07
Bangladesh	BGD	Lower middle income	Total		2017	3.29942e+07
Bangladesh	BGD	Lower middle income	Total		2018	3.81981e+07
Bangladesh	BGD	Lower middle income	Total		2019	41036585
Benin	BEN	Lower middle income	Total Official multilateral		2014	1.69429e+06
Benin	BEN	Lower middle income	Total Official multilateral		2015	1.75946e+06
Benin	BEN	Lower middle income	Total Official multilateral		2016	1.86289e+06
Benin	BEN	Lower middle income	Total Official multilateral		2017	2.2846e+06
Benin	BEN	Lower middle income	Total Official multilateral		2018	2.28503e+06
Benin	BEN	Lower middle income	Total Official multilateral		2019	2374407
Benin	BEN	Lower middle income	Official multilateral	African Dev. Bank	2014	311833
Benin	BEN	Lower middle income	Official multilateral	African Dev. Bank	2015	311393
Benin	BEN	Lower middle income	Official multilateral	African Dev. Bank	2016	336852
Benin	BEN	Lower middle income	Official multilateral	African Dev. Bank	2017	430192
Benin	BEN	Lower middle income	Official multilateral	African Dev. Bank	2018	438461
Benin	BEN	Lower middle income	Official multilateral	African Dev. Bank	2019	447254
Benin	BEN	Lower middle income	Official multilateral	Asian Dev. Bank	2014	0
Benin	BEN	Lower middle income	Official multilateral	Asian Dev. Bank	2015	0
Benin	BEN	Lower middle income	Official multilateral	Asian Dev. Bank	2016	0
Benin	BEN	Lower middle income	Official multilateral	Asian Dev. Bank	2017	0
Benin	BEN	Lower middle income	Official multilateral	Asian Dev. Bank	2018	0
Benin	BEN	Lower middle income	Official multilateral	Asian Dev. Bank	2019	0
Benin	BEN	Lower middle income	Official multilateral	Inter-American Dev. Bank	2014	0
Benin	BEN	Lower middle income	Official multilateral	Inter-American Dev. Bank	2015	0
Benin	BEN	Lower middle income	Official multilateral	Inter-American Dev. Bank	2016	0
Benin	BEN	Lower middle income	Official multilateral	Inter-American Dev. Bank	2017	0
Benin	BEN	Lower middle income	Official multilateral	Inter-American Dev. Bank	2018	0
Benin	BEN	Lower middle income	Official multilateral	Inter-American Dev. Bank	2019	0
Benin	BEN	Lower middle income	Official multilateral	International Monetary Fund	2014	220268
Benin	BEN	Lower middle income	Official multilateral	International Monetary Fund	2015	202342
Benin	BEN	Lower middle income	Official multilateral	International Monetary Fund	2016	186959
Benin	BEN	Lower middle income	Official multilateral	International Monetary Fund	2017	226385
Benin	BEN	Lower middle income	Official multilateral	International Monetary Fund	2018	244567
Benin	BEN	Lower middle income	Official multilateral	International Monetary Fund	2019	266700
Benin	BEN	Lower middle income	Official multilateral	World Bank-IBRD	2014	0
Benin	BEN	Lower middle income	Official multilateral	World Bank-IBRD	2015	0
Benin	BEN	Lower middle income	Official multilateral	World Bank-IBRD	2016	0
Benin	BEN	Lower middle income	Official multilateral	World Bank-IBRD	2017	0
Benin	BEN	Lower middle income	Official multilateral	World Bank-IBRD	2018	0
Benin	BEN	Lower middle income	Official multilateral	World Bank-IBRD	2019	0
Benin	BEN	Lower middle income	Official multilateral	World Bank-IDA	2014	621713
Benin	BEN	Lower middle income	Official multilateral	World Bank-IDA	2015	680457
Benin	BEN	Lower middle income	Official multilateral	World Bank-IDA	2016	764505
Benin	BEN	Lower middle income	Official multilateral	World Bank-IDA	2017	914161
Benin	BEN	Lower middle income	Official multilateral	World Bank-IDA	2018	983851
Benin	BEN	Lower middle income	Official multilateral	World Bank-IDA	2019	1081787
Benin	BEN	Lower middle income	Official multilateral	Other multilateral	2014	540473
Benin	BEN	Lower middle income	Official multilateral	Other multilateral	2015	565273
Benin	BEN	Lower middle income	Official multilateral	Other multilateral	2016	574579
Benin	BEN	Lower middle income	Official multilateral	Other multilateral	2017	713858
Benin	BEN	Lower middle income	Official multilateral	Other multilateral	2018	618153
Benin	BEN	Lower middle income	Official multilateral	Other multilateral	2019	578665
Benin	BEN	Lower middle income	Total Official bilateral		2014	300938
Benin	BEN	Lower middle income	Total Official bilateral		2015	356822
Benin	BEN	Lower middle income	Total Official bilateral		2016	353044
Benin	BEN	Lower middle income	Total Official bilateral		2017	419883
Benin	BEN	Lower middle income	Total Official bilateral		2018	451578
Benin	BEN	Lower middle income	Total Official bilateral		2019	507733
Benin	BEN	Lower middle income	Official bilateral	China	2014	200114
Benin	BEN	Lower middle income	Official bilateral	China	2015	245432
Benin	BEN	Lower middle income	Official bilateral	China	2016	239396
Benin	BEN	Lower middle income	Official bilateral	China	2017	288556
Benin	BEN	Lower middle income	Official bilateral	China	2018	317501
Benin	BEN	Lower middle income	Official bilateral	China	2019	302101
Benin	BEN	Lower middle income	Official bilateral	France	2014	5855.6
Benin	BEN	Lower middle income	Official bilateral	France	2015	3991.17
Benin	BEN	Lower middle income	Official bilateral	France	2016	2611.01
Benin	BEN	Lower middle income	Official bilateral	France	2017	12537.5
Benin	BEN	Lower middle income	Official bilateral	France	2018	16837.2
Benin	BEN	Lower middle income	Official bilateral	France	2019	21630
Benin	BEN	Lower middle income	Official bilateral	India	2014	29870
Benin	BEN	Lower middle income	Official bilateral	India	2015	29767
Benin	BEN	Lower middle income	Official bilateral	India	2016	28767
Benin	BEN	Lower middle income	Official bilateral	India	2017	28319
Benin	BEN	Lower middle income	Official bilateral	India	2018	26594
Benin	BEN	Lower middle income	Official bilateral	India	2019	23254
Benin	BEN	Lower middle income	Official bilateral	Kuwait	2014	45648.9
Benin	BEN	Lower middle income	Official bilateral	Kuwait	2015	48543.8
Benin	BEN	Lower middle income	Official bilateral	Kuwait	2016	50452.4
Benin	BEN	Lower middle income	Official bilateral	Kuwait	2017	51589.9
Benin	BEN	Lower middle income	Official bilateral	Kuwait	2018	48769.6
Benin	BEN	Lower middle income	Official bilateral	Kuwait	2019	46062
Benin	BEN	Lower middle income	Official bilateral	Saudi Arabia	2014	15896
Benin	BEN	Lower middle income	Official bilateral	Saudi Arabia	2015	23805.1
Benin	BEN	Lower middle income	Official bilateral	Saudi Arabia	2016	26188.5
Benin	BEN	Lower middle income	Official bilateral	Saudi Arabia	2017	33917.1
Benin	BEN	Lower middle income	Official bilateral	Saudi Arabia	2018	37579.7
Benin	BEN	Lower middle income	Official bilateral	Saudi Arabia	2019	38092
Benin	BEN	Lower middle income	Official bilateral	United Arab Emirates	2014	3552.62
Benin	BEN	Lower middle income	Official bilateral	United Arab Emirates	2015	5282.51
Benin	BEN	Lower middle income	Official bilateral	United Arab Emirates	2016	5629.41
Benin	BEN	Lower middle income	Official bilateral	United Arab Emirates	2017	4962.83
Benin	BEN	Lower middle income	Official bilateral	United Arab Emirates	2018	4296.26
Benin	BEN	Lower middle income	Official bilateral	United Arab Emirates	2019	3514
Benin	BEN	Lower middle income	Total Non-official		2014	0
Benin	BEN	Lower middle income	Total Non-official		2015	0
Benin	BEN	Lower middle income	Total Non-official		2016	0
Benin	BEN	Lower middle income	Total Non-official		2017	41119.2
Benin	BEN	Lower middle income	Total Non-official		2018	815490
Benin	BEN	Lower middle income	Total Non-official		2019	507733
Benin	BEN	Lower middle income	Non-official	Germany	2014	0
Benin	BEN	Lower middle income	Non-official	Germany	2015	0
Benin	BEN	Lower middle income	Non-official	Germany	2016	0
Benin	BEN	Lower middle income	Non-official	Germany	2017	0
Benin	BEN	Lower middle income	Non-official	Germany	2018	400750
Benin	BEN	Lower middle income	Non-official	Germany	2019	89888
Benin	BEN	Lower middle income	Non-official	Netherlands	2014	0
Benin	BEN	Lower middle income	Non-official	Netherlands	2015	0
Benin	BEN	Lower middle income	Non-official	Netherlands	2016	0
Benin	BEN	Lower middle income	Non-official	Netherlands	2017	41119.2
Benin	BEN	Lower middle income	Non-official	Netherlands	2018	117040
Benin	BEN	Lower middle income	Non-official	Netherlands	2019	125761
Benin	BEN	Lower middle income	Non-official	United Kingdom	2014	0
Benin	BEN	Lower middle income	Non-official	United Kingdom	2015	0
Benin	BEN	Lower middle income	Non-official	United Kingdom	2016	0
Benin	BEN	Lower middle income	Non-official	United Kingdom	2017	0
Benin	BEN	Lower middle income	Non-official	United Kingdom	2018	297700
Benin	BEN	Lower middle income	Non-official	United Kingdom	2019	292084
Benin	BEN	Lower middle income	Total Bondholders		2014	0
Benin	BEN	Lower middle income	Total Bondholders		2015	0
Benin	BEN	Lower middle income	Total Bondholders		2016	0
Benin	BEN	Lower middle income	Total Bondholders		2017	0
Benin	BEN	Lower middle income	Total Bondholders		2018	0
Benin	BEN	Lower middle income	Total Bondholders		2019	556563
Benin	BEN	Lower middle income	Total		2014	1.99523e+06
Benin	BEN	Lower middle income	Total		2015	2.11629e+06
Benin	BEN	Lower middle income	Total		2016	2.21594e+06
Benin	BEN	Lower middle income	Total		2017	2.7456e+06
Benin	BEN	Lower middle income	Total		2018	3.5521e+06
Benin	BEN	Lower middle income	Total		2019	3611139
Burundi	BDI	Low income	Total Official multilateral		2014	552138
Burundi	BDI	Low income	Total Official multilateral		2015	524816
Burundi	BDI	Low income	Total Official multilateral		2016	504208
Burundi	BDI	Low income	Total Official multilateral		2017	506472
Burundi	BDI	Low income	Total Official multilateral		2018	480814
Burundi	BDI	Low income	Total Official multilateral		2019	467664
Burundi	BDI	Low income	Total Official bilateral		2014	89765.5
Burundi	BDI	Low income	Total Official bilateral		2015	100900
Burundi	BDI	Low income	Total Official bilateral		2016	98301.5
Burundi	BDI	Low income	Total Official bilateral		2017	107235
Burundi	BDI	Low income	Total Official bilateral		2018	108263
Burundi	BDI	Low income	Total Official bilateral		2019	110420
Burundi	BDI	Low income	Total Non-official		2014	0
Burundi	BDI	Low income	Total Non-official		2015	0
Burundi	BDI	Low income	Total Non-official		2016	0
Burundi	BDI	Low income	Total Non-official		2017	0
Burundi	BDI	Low income	Total Non-official		2018	0
Burundi	BDI	Low income	Total Non-official		2019	0
Burundi	BDI	Low income	Official multilateral	African Dev. Bank	2014	34052.8
Burundi	BDI	Low income	Official multilateral	African Dev. Bank	2015	32808.6
Burundi	BDI	Low income	Official multilateral	African Dev. Bank	2016	31925.2
Burundi	BDI	Low income	Official multilateral	African Dev. Bank	2017	32202.5
Burundi	BDI	Low income	Official multilateral	African Dev. Bank	2018	31422.2
Burundi	BDI	Low income	Official multilateral	African Dev. Bank	2019	31033
Burundi	BDI	Low income	Official multilateral	Asian Dev. Bank	2014	0
Burundi	BDI	Low income	Official multilateral	Asian Dev. Bank	2015	0
Burundi	BDI	Low income	Official multilateral	Asian Dev. Bank	2016	0
Burundi	BDI	Low income	Official multilateral	Asian Dev. Bank	2017	0
Burundi	BDI	Low income	Official multilateral	Asian Dev. Bank	2018	0
Burundi	BDI	Low income	Official multilateral	Asian Dev. Bank	2019	0
Burundi	BDI	Low income	Official multilateral	Inter-American Dev. Bank	2014	0
Burundi	BDI	Low income	Official multilateral	Inter-American Dev. Bank	2015	0
Burundi	BDI	Low income	Official multilateral	Inter-American Dev. Bank	2016	0
Burundi	BDI	Low income	Official multilateral	Inter-American Dev. Bank	2017	0
Burundi	BDI	Low income	Official multilateral	Inter-American Dev. Bank	2018	0
Burundi	BDI	Low income	Official multilateral	Inter-American Dev. Bank	2019	0
Burundi	BDI	Low income	Official multilateral	International Monetary Fund	2014	238350
Burundi	BDI	Low income	Official multilateral	International Monetary Fund	2015	217600
Burundi	BDI	Low income	Official multilateral	International Monetary Fund	2016	193650
Burundi	BDI	Low income	Official multilateral	International Monetary Fund	2017	188077
Burundi	BDI	Low income	Official multilateral	International Monetary Fund	2018	166351
Burundi	BDI	Low income	Official multilateral	International Monetary Fund	2019	149136
Burundi	BDI	Low income	Official multilateral	World Bank-IBRD	2014	0
Burundi	BDI	Low income	Official multilateral	World Bank-IBRD	2015	0
Burundi	BDI	Low income	Official multilateral	World Bank-IBRD	2016	0
Burundi	BDI	Low income	Official multilateral	World Bank-IBRD	2017	0
Burundi	BDI	Low income	Official multilateral	World Bank-IBRD	2018	0
Burundi	BDI	Low income	Official multilateral	World Bank-IBRD	2019	0
Burundi	BDI	Low income	Official multilateral	World Bank-IDA	2014	160731
Burundi	BDI	Low income	Official multilateral	World Bank-IDA	2015	150608
Burundi	BDI	Low income	Official multilateral	World Bank-IDA	2016	143008
Burundi	BDI	Low income	Official multilateral	World Bank-IDA	2017	148210
Burundi	BDI	Low income	Official multilateral	World Bank-IDA	2018	141532
Burundi	BDI	Low income	Official multilateral	World Bank-IDA	2019	137531
Burundi	BDI	Low income	Official multilateral	Other multilateral	2014	119004
Burundi	BDI	Low income	Official multilateral	Other multilateral	2015	123800
Burundi	BDI	Low income	Official multilateral	Other multilateral	2016	135625
Burundi	BDI	Low income	Official multilateral	Other multilateral	2017	137983
Burundi	BDI	Low income	Official multilateral	Other multilateral	2018	141509
Burundi	BDI	Low income	Official multilateral	Other multilateral	2019	149964
Burundi	BDI	Low income	Total Bondholders		2014	0
Burundi	BDI	Low income	Total Bondholders		2015	0
Burundi	BDI	Low income	Total Bondholders		2016	0
Burundi	BDI	Low income	Total Bondholders		2017	0
Burundi	BDI	Low income	Total Bondholders		2018	0
Burundi	BDI	Low income	Total Bondholders		2019	0
Burundi	BDI	Low income	Official bilateral	China	2014	0
Burundi	BDI	Low income	Official bilateral	China	2015	10744.2
Burundi	BDI	Low income	Official bilateral	China	2016	13713.2
Burundi	BDI	Low income	Official bilateral	China	2017	14636
Burundi	BDI	Low income	Official bilateral	China	2018	13906.9
Burundi	BDI	Low income	Official bilateral	China	2019	13907
Burundi	BDI	Low income	Official bilateral	India	2014	25187
Burundi	BDI	Low income	Official bilateral	India	2015	26577
Burundi	BDI	Low income	Official bilateral	India	2016	21413
Burundi	BDI	Low income	Official bilateral	India	2017	30826
Burundi	BDI	Low income	Official bilateral	India	2018	32700
Burundi	BDI	Low income	Official bilateral	India	2019	36691
Burundi	BDI	Low income	Official bilateral	Kuwait	2014	22189.2
Burundi	BDI	Low income	Official bilateral	Kuwait	2015	21407
Burundi	BDI	Low income	Official bilateral	Kuwait	2016	21221.6
Burundi	BDI	Low income	Official bilateral	Kuwait	2017	21520.4
Burundi	BDI	Low income	Official bilateral	Kuwait	2018	21403.4
Burundi	BDI	Low income	Official bilateral	Kuwait	2019	21439
Burundi	BDI	Low income	Official bilateral	Libya	2014	4375
Burundi	BDI	Low income	Official bilateral	Libya	2015	4375
Burundi	BDI	Low income	Official bilateral	Libya	2016	4375
Burundi	BDI	Low income	Official bilateral	Libya	2017	4375
Burundi	BDI	Low income	Official bilateral	Libya	2018	4375
Burundi	BDI	Low income	Official bilateral	Libya	2019	4375
Burundi	BDI	Low income	Official bilateral	Saudi Arabia	2014	36262.7
Burundi	BDI	Low income	Official bilateral	Saudi Arabia	2015	36262.7
Burundi	BDI	Low income	Official bilateral	Saudi Arabia	2016	36262.7
Burundi	BDI	Low income	Official bilateral	Saudi Arabia	2017	34781.3
Burundi	BDI	Low income	Official bilateral	Saudi Arabia	2018	34781.3
Burundi	BDI	Low income	Official bilateral	Saudi Arabia	2019	33186
Burundi	BDI	Low income	Official bilateral	United Arab Emirates	2014	1751.67
Burundi	BDI	Low income	Official bilateral	United Arab Emirates	2015	1533.83
Burundi	BDI	Low income	Official bilateral	United Arab Emirates	2016	1316
Burundi	BDI	Low income	Official bilateral	United Arab Emirates	2017	1096.66
Burundi	BDI	Low income	Official bilateral	United Arab Emirates	2018	1096.8
Burundi	BDI	Low income	Official bilateral	United Arab Emirates	2019	823
Burundi	BDI	Low income	Total		2014	641903
Burundi	BDI	Low income	Total		2015	625716
Burundi	BDI	Low income	Total		2016	602510
Burundi	BDI	Low income	Total		2017	613707
Burundi	BDI	Low income	Total		2018	589078
Burundi	BDI	Low income	Total		2019	428948
Cabo Verde	CPV	Lower middle income	Total Official multilateral		2014	717739
Cabo Verde	CPV	Lower middle income	Total Official multilateral		2015	735097
Cabo Verde	CPV	Lower middle income	Total Official multilateral		2016	736405
Cabo Verde	CPV	Lower middle income	Total Official multilateral		2017	809961
Cabo Verde	CPV	Lower middle income	Total Official multilateral		2018	814939
Cabo Verde	CPV	Lower middle income	Total Official multilateral		2019	895132
Cabo Verde	CPV	Lower middle income	Total Official bilateral		2014	341423
Cabo Verde	CPV	Lower middle income	Total Official bilateral		2015	345212
Cabo Verde	CPV	Lower middle income	Total Official bilateral		2016	342943
Cabo Verde	CPV	Lower middle income	Total Official bilateral		2017	411649
Cabo Verde	CPV	Lower middle income	Total Official bilateral		2018	404734
Cabo Verde	CPV	Lower middle income	Total Official bilateral		2019	419049
Cabo Verde	CPV	Lower middle income	Total Non-official		2014	482536
Cabo Verde	CPV	Lower middle income	Total Non-official		2015	460736
Cabo Verde	CPV	Lower middle income	Total Non-official		2016	461714
Cabo Verde	CPV	Lower middle income	Total Non-official		2017	538601
Cabo Verde	CPV	Lower middle income	Total Non-official		2018	514215
Cabo Verde	CPV	Lower middle income	Total Non-official		2019	506983
Cabo Verde	CPV	Lower middle income	Official multilateral	African Dev. Bank	2014	235366
Cabo Verde	CPV	Lower middle income	Official multilateral	African Dev. Bank	2015	238210
Cabo Verde	CPV	Lower middle income	Official multilateral	African Dev. Bank	2016	234430
Cabo Verde	CPV	Lower middle income	Official multilateral	African Dev. Bank	2017	283982
Cabo Verde	CPV	Lower middle income	Official multilateral	African Dev. Bank	2018	307194
Cabo Verde	CPV	Lower middle income	Official multilateral	African Dev. Bank	2019	324703
Cabo Verde	CPV	Lower middle income	Official multilateral	Asian Dev. Bank	2014	0
Cabo Verde	CPV	Lower middle income	Official multilateral	Asian Dev. Bank	2015	0
Cabo Verde	CPV	Lower middle income	Official multilateral	Asian Dev. Bank	2016	0
Cabo Verde	CPV	Lower middle income	Official multilateral	Asian Dev. Bank	2017	0
Cabo Verde	CPV	Lower middle income	Official multilateral	Asian Dev. Bank	2018	0
Cabo Verde	CPV	Lower middle income	Official multilateral	Asian Dev. Bank	2019	0
Cabo Verde	CPV	Lower middle income	Official multilateral	Inter-American Dev. Bank	2014	0
Cabo Verde	CPV	Lower middle income	Official multilateral	Inter-American Dev. Bank	2015	0
Cabo Verde	CPV	Lower middle income	Official multilateral	Inter-American Dev. Bank	2016	0
Cabo Verde	CPV	Lower middle income	Official multilateral	Inter-American Dev. Bank	2017	0
Cabo Verde	CPV	Lower middle income	Official multilateral	Inter-American Dev. Bank	2018	0
Cabo Verde	CPV	Lower middle income	Official multilateral	Inter-American Dev. Bank	2019	0
Cabo Verde	CPV	Lower middle income	Official multilateral	International Monetary Fund	2014	13644.9
Cabo Verde	CPV	Lower middle income	Official multilateral	International Monetary Fund	2015	12705.8
Cabo Verde	CPV	Lower middle income	Official multilateral	International Monetary Fund	2016	12326.2
Cabo Verde	CPV	Lower middle income	Official multilateral	International Monetary Fund	2017	13057.9
Cabo Verde	CPV	Lower middle income	Official multilateral	International Monetary Fund	2018	12752.2
Cabo Verde	CPV	Lower middle income	Official multilateral	International Monetary Fund	2019	12679
Cabo Verde	CPV	Lower middle income	Official multilateral	World Bank-IBRD	2014	39335
Cabo Verde	CPV	Lower middle income	Official multilateral	World Bank-IBRD	2015	40752
Cabo Verde	CPV	Lower middle income	Official multilateral	World Bank-IBRD	2016	41151
Cabo Verde	CPV	Lower middle income	Official multilateral	World Bank-IBRD	2017	45593
Cabo Verde	CPV	Lower middle income	Official multilateral	World Bank-IBRD	2018	42364
Cabo Verde	CPV	Lower middle income	Official multilateral	World Bank-IBRD	2019	39754
Cabo Verde	CPV	Lower middle income	Official multilateral	World Bank-IDA	2014	318930
Cabo Verde	CPV	Lower middle income	Official multilateral	World Bank-IDA	2015	316614
Cabo Verde	CPV	Lower middle income	Official multilateral	World Bank-IDA	2016	303528
Cabo Verde	CPV	Lower middle income	Official multilateral	World Bank-IDA	2017	316135
Cabo Verde	CPV	Lower middle income	Official multilateral	World Bank-IDA	2018	309025
Cabo Verde	CPV	Lower middle income	Official multilateral	World Bank-IDA	2019	366347
Cabo Verde	CPV	Lower middle income	Official multilateral	Other multilateral	2014	110462
Cabo Verde	CPV	Lower middle income	Official multilateral	Other multilateral	2015	126815
Cabo Verde	CPV	Lower middle income	Official multilateral	Other multilateral	2016	144970
Cabo Verde	CPV	Lower middle income	Official multilateral	Other multilateral	2017	151192
Cabo Verde	CPV	Lower middle income	Official multilateral	Other multilateral	2018	143604
Cabo Verde	CPV	Lower middle income	Official multilateral	Other multilateral	2019	151650
Cabo Verde	CPV	Lower middle income	Total Bondholders		2014	0
Cabo Verde	CPV	Lower middle income	Total Bondholders		2015	0
Cabo Verde	CPV	Lower middle income	Total Bondholders		2016	0
Cabo Verde	CPV	Lower middle income	Total Bondholders		2017	0
Cabo Verde	CPV	Lower middle income	Total Bondholders		2018	0
Cabo Verde	CPV	Lower middle income	Total Bondholders		2019	0
Cabo Verde	CPV	Lower middle income	Official bilateral	Austria	2014	9635.1
Cabo Verde	CPV	Lower middle income	Official bilateral	Austria	2015	12461.3
Cabo Verde	CPV	Lower middle income	Official bilateral	Austria	2016	12255
Cabo Verde	CPV	Lower middle income	Official bilateral	Austria	2017	13603.7
Cabo Verde	CPV	Lower middle income	Official bilateral	Austria	2018	12438.1
Cabo Verde	CPV	Lower middle income	Official bilateral	Austria	2019	11663
Cabo Verde	CPV	Lower middle income	Official bilateral	Belgium	2014	883.86
Cabo Verde	CPV	Lower middle income	Official bilateral	Belgium	2015	792.57
Cabo Verde	CPV	Lower middle income	Official bilateral	Belgium	2016	690.44
Cabo Verde	CPV	Lower middle income	Official bilateral	Belgium	2017	696.79
Cabo Verde	CPV	Lower middle income	Official bilateral	Belgium	2018	621.74
Cabo Verde	CPV	Lower middle income	Official bilateral	Belgium	2019	610
Cabo Verde	CPV	Lower middle income	Official bilateral	China	2014	31519.5
Cabo Verde	CPV	Lower middle income	Official bilateral	China	2015	27661.7
Cabo Verde	CPV	Lower middle income	Official bilateral	China	2016	23923.8
Cabo Verde	CPV	Lower middle income	Official bilateral	China	2017	23491
Cabo Verde	CPV	Lower middle income	Official bilateral	China	2018	20379.8
Cabo Verde	CPV	Lower middle income	Official bilateral	China	2019	30179
Cabo Verde	CPV	Lower middle income	Official bilateral	France	2014	10625.8
Cabo Verde	CPV	Lower middle income	Official bilateral	France	2015	17169.9
Cabo Verde	CPV	Lower middle income	Official bilateral	France	2016	17075.4
Cabo Verde	CPV	Lower middle income	Official bilateral	France	2017	50555.3
Cabo Verde	CPV	Lower middle income	Official bilateral	France	2018	51403.6
Cabo Verde	CPV	Lower middle income	Official bilateral	France	2019	53319
Cabo Verde	CPV	Lower middle income	Official bilateral	Japan	2014	34192.6
Cabo Verde	CPV	Lower middle income	Official bilateral	Japan	2015	57369.3
Cabo Verde	CPV	Lower middle income	Official bilateral	Japan	2016	68116.4
Cabo Verde	CPV	Lower middle income	Official bilateral	Japan	2017	76944.2
Cabo Verde	CPV	Lower middle income	Official bilateral	Japan	2018	86808.6
Cabo Verde	CPV	Lower middle income	Official bilateral	Japan	2019	92275
Cabo Verde	CPV	Lower middle income	Official bilateral	Kuwait	2014	10198.1
Cabo Verde	CPV	Lower middle income	Official bilateral	Kuwait	2015	9495.9
Cabo Verde	CPV	Lower middle income	Official bilateral	Kuwait	2016	9479.01
Cabo Verde	CPV	Lower middle income	Official bilateral	Kuwait	2017	10891
Cabo Verde	CPV	Lower middle income	Official bilateral	Kuwait	2018	10304.7
Cabo Verde	CPV	Lower middle income	Official bilateral	Kuwait	2019	12651
Cabo Verde	CPV	Lower middle income	Official bilateral	Nigeria	2014	2373
Cabo Verde	CPV	Lower middle income	Official bilateral	Nigeria	2015	1993
Cabo Verde	CPV	Lower middle income	Official bilateral	Nigeria	2016	1613
Cabo Verde	CPV	Lower middle income	Official bilateral	Nigeria	2017	1233
Cabo Verde	CPV	Lower middle income	Official bilateral	Nigeria	2018	853
Cabo Verde	CPV	Lower middle income	Official bilateral	Nigeria	2019	0
Cabo Verde	CPV	Lower middle income	Official bilateral	Portugal	2014	180332
Cabo Verde	CPV	Lower middle income	Official bilateral	Portugal	2015	159504
Cabo Verde	CPV	Lower middle income	Official bilateral	Portugal	2016	152021
Cabo Verde	CPV	Lower middle income	Official bilateral	Portugal	2017	170210
Cabo Verde	CPV	Lower middle income	Official bilateral	Portugal	2018	160244
Cabo Verde	CPV	Lower middle income	Official bilateral	Portugal	2019	155495
Cabo Verde	CPV	Lower middle income	Official bilateral	Saudi Arabia	2014	14833.9
Cabo Verde	CPV	Lower middle income	Official bilateral	Saudi Arabia	2015	15258.4
Cabo Verde	CPV	Lower middle income	Official bilateral	Saudi Arabia	2016	16596
Cabo Verde	CPV	Lower middle income	Official bilateral	Saudi Arabia	2017	18816.3
Cabo Verde	CPV	Lower middle income	Official bilateral	Saudi Arabia	2018	19387.5
Cabo Verde	CPV	Lower middle income	Official bilateral	Saudi Arabia	2019	19041
Cabo Verde	CPV	Lower middle income	Official bilateral	Spain	2014	44392.4
Cabo Verde	CPV	Lower middle income	Official bilateral	Spain	2015	41070.1
Cabo Verde	CPV	Lower middle income	Official bilateral	Spain	2016	38737.1
Cabo Verde	CPV	Lower middle income	Official bilateral	Spain	2017	42771.8
Cabo Verde	CPV	Lower middle income	Official bilateral	Spain	2018	39856.3
Cabo Verde	CPV	Lower middle income	Official bilateral	Spain	2019	43816
Cabo Verde	CPV	Lower middle income	Official bilateral	Other bilateral	2014	2436
Cabo Verde	CPV	Lower middle income	Official bilateral	Other bilateral	2015	2436
Cabo Verde	CPV	Lower middle income	Official bilateral	Other bilateral	2016	2436
Cabo Verde	CPV	Lower middle income	Official bilateral	Other bilateral	2017	2436
Cabo Verde	CPV	Lower middle income	Official bilateral	Other bilateral	2018	2436
Cabo Verde	CPV	Lower middle income	Official bilateral	Other bilateral	2019	0
Cabo Verde	CPV	Lower middle income	Total		2014	1.5417e+06
Cabo Verde	CPV	Lower middle income	Total		2015	1.54104e+06
Cabo Verde	CPV	Lower middle income	Total		2016	1.54106e+06
Cabo Verde	CPV	Lower middle income	Total		2017	1.76021e+06
Cabo Verde	CPV	Lower middle income	Total		2018	1.73389e+06
Cabo Verde	CPV	Lower middle income	Total		2019	1808485
Cabo Verde	CPV	Lower middle income	Non-official	Portugal	2014	482536
Cabo Verde	CPV	Lower middle income	Non-official	Portugal	2015	460736
Cabo Verde	CPV	Lower middle income	Non-official	Portugal	2016	461714
Cabo Verde	CPV	Lower middle income	Non-official	Portugal	2017	538601
Cabo Verde	CPV	Lower middle income	Non-official	Portugal	2018	514215
Cabo Verde	CPV	Lower middle income	Non-official	Portugal	2019	504514
Cambodia	KHM	Lower middle income	Total Official multilateral		2014	1.8117e+06
Cambodia	KHM	Lower middle income	Total Official multilateral		2015	1.79731e+06
Cambodia	KHM	Lower middle income	Total Official multilateral		2016	1.84758e+06
Cambodia	KHM	Lower middle income	Total Official multilateral		2017	2.05731e+06
Cambodia	KHM	Lower middle income	Total Official multilateral		2018	2.07399e+06
Cambodia	KHM	Lower middle income	Total Official multilateral		2019	2218495
Cambodia	KHM	Lower middle income	Total Official bilateral		2014	3.69377e+06
Cambodia	KHM	Lower middle income	Total Official bilateral		2015	4.08847e+06
Cambodia	KHM	Lower middle income	Total Official bilateral		2016	4.22941e+06
Cambodia	KHM	Lower middle income	Total Official bilateral		2017	4.77174e+06
Cambodia	KHM	Lower middle income	Total Official bilateral		2018	5.17014e+06
Cambodia	KHM	Lower middle income	Total Official bilateral		2019	5459452
Cambodia	KHM	Lower middle income	Total Non-official		2014	0
Cambodia	KHM	Lower middle income	Total Non-official		2015	0
Cambodia	KHM	Lower middle income	Total Non-official		2016	0
Cambodia	KHM	Lower middle income	Total Non-official		2017	0
Cambodia	KHM	Lower middle income	Total Non-official		2018	0
Cambodia	KHM	Lower middle income	Total Non-official		2019	0
Cambodia	KHM	Lower middle income	Official multilateral	African Dev. Bank	2014	0
Cambodia	KHM	Lower middle income	Official multilateral	African Dev. Bank	2015	0
Cambodia	KHM	Lower middle income	Official multilateral	African Dev. Bank	2016	0
Cambodia	KHM	Lower middle income	Official multilateral	African Dev. Bank	2017	0
Cambodia	KHM	Lower middle income	Official multilateral	African Dev. Bank	2018	0
Cambodia	KHM	Lower middle income	Official multilateral	African Dev. Bank	2019	0
Cambodia	KHM	Lower middle income	Official multilateral	Asian Dev. Bank	2014	1034616
Cambodia	KHM	Lower middle income	Official multilateral	Asian Dev. Bank	2015	1052122
Cambodia	KHM	Lower middle income	Official multilateral	Asian Dev. Bank	2016	1122497
Cambodia	KHM	Lower middle income	Official multilateral	Asian Dev. Bank	2017	1285045
Cambodia	KHM	Lower middle income	Official multilateral	Asian Dev. Bank	2018	1304998
Cambodia	KHM	Lower middle income	Official multilateral	Asian Dev. Bank	2019	1404424
Cambodia	KHM	Lower middle income	Official multilateral	Inter-American Dev. Bank	2014	0
Cambodia	KHM	Lower middle income	Official multilateral	Inter-American Dev. Bank	2015	0
Cambodia	KHM	Lower middle income	Official multilateral	Inter-American Dev. Bank	2016	0
Cambodia	KHM	Lower middle income	Official multilateral	Inter-American Dev. Bank	2017	0
Cambodia	KHM	Lower middle income	Official multilateral	Inter-American Dev. Bank	2018	0
Cambodia	KHM	Lower middle income	Official multilateral	Inter-American Dev. Bank	2019	0
Cambodia	KHM	Lower middle income	Official multilateral	International Monetary Fund	2014	121584
Cambodia	KHM	Lower middle income	Official multilateral	International Monetary Fund	2015	116291
Cambodia	KHM	Lower middle income	Official multilateral	International Monetary Fund	2016	112816
Cambodia	KHM	Lower middle income	Official multilateral	International Monetary Fund	2017	119513
Cambodia	KHM	Lower middle income	Official multilateral	International Monetary Fund	2018	116715
Cambodia	KHM	Lower middle income	Official multilateral	International Monetary Fund	2019	116047
Cambodia	KHM	Lower middle income	Official multilateral	World Bank-IBRD	2014	0
Cambodia	KHM	Lower middle income	Official multilateral	World Bank-IBRD	2015	0
Cambodia	KHM	Lower middle income	Official multilateral	World Bank-IBRD	2016	0
Cambodia	KHM	Lower middle income	Official multilateral	World Bank-IBRD	2017	0
Cambodia	KHM	Lower middle income	Official multilateral	World Bank-IBRD	2018	0
Cambodia	KHM	Lower middle income	Official multilateral	World Bank-IBRD	2019	0
Cambodia	KHM	Lower middle income	Official multilateral	World Bank-IDA	2014	577338
Cambodia	KHM	Lower middle income	Official multilateral	World Bank-IDA	2015	541486
Cambodia	KHM	Lower middle income	Official multilateral	World Bank-IDA	2016	518448
Cambodia	KHM	Lower middle income	Official multilateral	World Bank-IDA	2017	549797
Cambodia	KHM	Lower middle income	Official multilateral	World Bank-IDA	2018	543571
Cambodia	KHM	Lower middle income	Official multilateral	World Bank-IDA	2019	584540
Cambodia	KHM	Lower middle income	Official multilateral	Other multilateral	2014	78159.5
Cambodia	KHM	Lower middle income	Official multilateral	Other multilateral	2015	87412.6
Cambodia	KHM	Lower middle income	Official multilateral	Other multilateral	2016	93816.4
Cambodia	KHM	Lower middle income	Official multilateral	Other multilateral	2017	102959
Cambodia	KHM	Lower middle income	Official multilateral	Other multilateral	2018	108706
Cambodia	KHM	Lower middle income	Official multilateral	Other multilateral	2019	113484
Cambodia	KHM	Lower middle income	Total Bondholders		2014	0
Cambodia	KHM	Lower middle income	Total Bondholders		2015	0
Cambodia	KHM	Lower middle income	Total Bondholders		2016	0
Cambodia	KHM	Lower middle income	Total Bondholders		2017	0
Cambodia	KHM	Lower middle income	Total Bondholders		2018	0
Cambodia	KHM	Lower middle income	Total Bondholders		2019	0
Cambodia	KHM	Lower middle income	Official bilateral	China	2014	2.37476e+06
Cambodia	KHM	Lower middle income	Official bilateral	China	2015	2.6834e+06
Cambodia	KHM	Lower middle income	Official bilateral	China	2016	2.79774e+06
Cambodia	KHM	Lower middle income	Official bilateral	China	2017	3.13759e+06
Cambodia	KHM	Lower middle income	Official bilateral	China	2018	3424944
Cambodia	KHM	Lower middle income	Official bilateral	China	2019	3608596
Cambodia	KHM	Lower middle income	Official bilateral	France	2014	30319.7
Cambodia	KHM	Lower middle income	Official bilateral	France	2015	75160.6
Cambodia	KHM	Lower middle income	Official bilateral	France	2016	71644
Cambodia	KHM	Lower middle income	Official bilateral	France	2017	154572
Cambodia	KHM	Lower middle income	Official bilateral	France	2018	194106
Cambodia	KHM	Lower middle income	Official bilateral	France	2019	337209
Cambodia	KHM	Lower middle income	Official bilateral	Germany	2014	1821.15
Cambodia	KHM	Lower middle income	Official bilateral	Germany	2015	1531.8
Cambodia	KHM	Lower middle income	Official bilateral	Germany	2016	1366.11
Cambodia	KHM	Lower middle income	Official bilateral	Germany	2017	1398.38
Cambodia	KHM	Lower middle income	Official bilateral	Germany	2018	1161.03
Cambodia	KHM	Lower middle income	Official bilateral	Germany	2019	943
Cambodia	KHM	Lower middle income	Official bilateral	India	2014	40252
Cambodia	KHM	Lower middle income	Official bilateral	India	2015	43244
Cambodia	KHM	Lower middle income	Official bilateral	India	2016	42228
Cambodia	KHM	Lower middle income	Official bilateral	India	2017	41292
Cambodia	KHM	Lower middle income	Official bilateral	India	2018	36936
Cambodia	KHM	Lower middle income	Official bilateral	India	2019	30226
Cambodia	KHM	Lower middle income	Official bilateral	Japan	2014	158107
Cambodia	KHM	Lower middle income	Official bilateral	Japan	2015	181950
Cambodia	KHM	Lower middle income	Official bilateral	Japan	2016	205616
Cambodia	KHM	Lower middle income	Official bilateral	Japan	2017	256209
Cambodia	KHM	Lower middle income	Official bilateral	Japan	2018	326527
Cambodia	KHM	Lower middle income	Official bilateral	Japan	2019	407084
Cambodia	KHM	Lower middle income	Official bilateral	Thailand	2014	61500.6
Cambodia	KHM	Lower middle income	Official bilateral	Thailand	2015	54971.5
Cambodia	KHM	Lower middle income	Official bilateral	Thailand	2016	54155.9
Cambodia	KHM	Lower middle income	Official bilateral	Thailand	2017	56245
Cambodia	KHM	Lower middle income	Official bilateral	Thailand	2018	53378.9
Cambodia	KHM	Lower middle income	Official bilateral	Thailand	2019	53881
Cambodia	KHM	Lower middle income	Official bilateral	United States	2014	306000
Cambodia	KHM	Lower middle income	Official bilateral	United States	2015	306000
Cambodia	KHM	Lower middle income	Official bilateral	United States	2016	306000
Cambodia	KHM	Lower middle income	Official bilateral	United States	2017	306000
Cambodia	KHM	Lower middle income	Official bilateral	United States	2018	306000
Cambodia	KHM	Lower middle income	Official bilateral	United States	2019	162269
Cambodia	KHM	Lower middle income	Official bilateral	Other bilateral	2014	721010
Cambodia	KHM	Lower middle income	Official bilateral	Other bilateral	2015	742211
Cambodia	KHM	Lower middle income	Official bilateral	Other bilateral	2016	750661
Cambodia	KHM	Lower middle income	Official bilateral	Other bilateral	2017	818433
Cambodia	KHM	Lower middle income	Official bilateral	Other bilateral	2018	827091
Cambodia	KHM	Lower middle income	Official bilateral	Other bilateral	2019	401469
Cambodia	KHM	Lower middle income	Total		2014	5.50547e+06
Cambodia	KHM	Lower middle income	Total		2015	5.88579e+06
Cambodia	KHM	Lower middle income	Total		2016	6.07699e+06
Cambodia	KHM	Lower middle income	Total		2017	6.82905e+06
Cambodia	KHM	Lower middle income	Total		2018	7.24413e+06
Cambodia	KHM	Lower middle income	Total		2019	7561900
Cameroon	CMR	Lower middle income	Total Official multilateral		2014	1.90807e+06
Cameroon	CMR	Lower middle income	Total Official multilateral		2015	1.98355e+06
Cameroon	CMR	Lower middle income	Total Official multilateral		2016	2.20803e+06
Cameroon	CMR	Lower middle income	Total Official multilateral		2017	3.05466e+06
Cameroon	CMR	Lower middle income	Total Official multilateral		2018	3.92706e+06
Cameroon	CMR	Lower middle income	Total Official multilateral		2019	4528048
Cameroon	CMR	Lower middle income	Total Official bilateral		2014	2.94006e+06
Cameroon	CMR	Lower middle income	Total Official bilateral		2015	3.12462e+06
Cameroon	CMR	Lower middle income	Total Official bilateral		2016	3.39556e+06
Cameroon	CMR	Lower middle income	Total Official bilateral		2017	4.43119e+06
Cameroon	CMR	Lower middle income	Total Official bilateral		2018	4.58814e+06
Cameroon	CMR	Lower middle income	Total Official bilateral		2019	5185931
Cameroon	CMR	Lower middle income	Total Non-official		2014	173627
Cameroon	CMR	Lower middle income	Total Non-official		2015	234251
Cameroon	CMR	Lower middle income	Total Non-official		2016	264542
Cameroon	CMR	Lower middle income	Total Non-official		2017	388185
Cameroon	CMR	Lower middle income	Total Non-official		2018	526975
Cameroon	CMR	Lower middle income	Total Non-official		2019	634563
Cameroon	CMR	Lower middle income	Official multilateral	African Dev. Bank	2014	451025
Cameroon	CMR	Lower middle income	Official multilateral	African Dev. Bank	2015	453328
Cameroon	CMR	Lower middle income	Official multilateral	African Dev. Bank	2016	551243
Cameroon	CMR	Lower middle income	Official multilateral	African Dev. Bank	2017	611469
Cameroon	CMR	Lower middle income	Official multilateral	African Dev. Bank	2018	1.08005e+06
Cameroon	CMR	Lower middle income	Official multilateral	African Dev. Bank	2019	1142293
Cameroon	CMR	Lower middle income	Official multilateral	Asian Dev. Bank	2014	0
Cameroon	CMR	Lower middle income	Official multilateral	Asian Dev. Bank	2015	0
Cameroon	CMR	Lower middle income	Official multilateral	Asian Dev. Bank	2016	0
Cameroon	CMR	Lower middle income	Official multilateral	Asian Dev. Bank	2017	0
Cameroon	CMR	Lower middle income	Official multilateral	Asian Dev. Bank	2018	0
Cameroon	CMR	Lower middle income	Official multilateral	Asian Dev. Bank	2019	0
Cameroon	CMR	Lower middle income	Official multilateral	Inter-American Dev. Bank	2014	0
Cameroon	CMR	Lower middle income	Official multilateral	Inter-American Dev. Bank	2015	0
Cameroon	CMR	Lower middle income	Official multilateral	Inter-American Dev. Bank	2016	0
Cameroon	CMR	Lower middle income	Official multilateral	Inter-American Dev. Bank	2017	0
Cameroon	CMR	Lower middle income	Official multilateral	Inter-American Dev. Bank	2018	0
Cameroon	CMR	Lower middle income	Official multilateral	Inter-American Dev. Bank	2019	0
Cameroon	CMR	Lower middle income	Official multilateral	International Monetary Fund	2014	406348
Cameroon	CMR	Lower middle income	Official multilateral	International Monetary Fund	2015	357776
Cameroon	CMR	Lower middle income	Official multilateral	International Monetary Fund	2016	318199
Cameroon	CMR	Lower middle income	Official multilateral	International Monetary Fund	2017	602413
Cameroon	CMR	Lower middle income	Official multilateral	International Monetary Fund	2018	714177
Cameroon	CMR	Lower middle income	Official multilateral	International Monetary Fund	2019	760370
Cameroon	CMR	Lower middle income	Official multilateral	World Bank-IBRD	2014	2667
Cameroon	CMR	Lower middle income	Official multilateral	World Bank-IBRD	2015	0
Cameroon	CMR	Lower middle income	Official multilateral	World Bank-IBRD	2016	0
Cameroon	CMR	Lower middle income	Official multilateral	World Bank-IBRD	2017	224394
Cameroon	CMR	Lower middle income	Official multilateral	World Bank-IBRD	2018	251561
Cameroon	CMR	Lower middle income	Official multilateral	World Bank-IBRD	2019	251860
Cameroon	CMR	Lower middle income	Official multilateral	World Bank-IDA	2014	740243
Cameroon	CMR	Lower middle income	Official multilateral	World Bank-IDA	2015	798099
Cameroon	CMR	Lower middle income	Official multilateral	World Bank-IDA	2016	896504
Cameroon	CMR	Lower middle income	Official multilateral	World Bank-IDA	2017	1081876
Cameroon	CMR	Lower middle income	Official multilateral	World Bank-IDA	2018	1180642
Cameroon	CMR	Lower middle income	Official multilateral	World Bank-IDA	2019	1480985
Cameroon	CMR	Lower middle income	Official multilateral	Other multilateral	2014	307792
Cameroon	CMR	Lower middle income	Official multilateral	Other multilateral	2015	374344
Cameroon	CMR	Lower middle income	Official multilateral	Other multilateral	2016	442086
Cameroon	CMR	Lower middle income	Official multilateral	Other multilateral	2017	534505
Cameroon	CMR	Lower middle income	Official multilateral	Other multilateral	2018	700630
Cameroon	CMR	Lower middle income	Official multilateral	Other multilateral	2019	892540
Cameroon	CMR	Lower middle income	Total Bondholders		2014	0
Cameroon	CMR	Lower middle income	Total Bondholders		2015	750000
Cameroon	CMR	Lower middle income	Total Bondholders		2016	686562
Cameroon	CMR	Lower middle income	Total Bondholders		2017	686562
Cameroon	CMR	Lower middle income	Total Bondholders		2018	686562
Cameroon	CMR	Lower middle income	Total Bondholders		2019	686562
Cameroon	CMR	Lower middle income	Official bilateral	Belgium	2014	36240.9
Cameroon	CMR	Lower middle income	Official bilateral	Belgium	2015	30928.9
Cameroon	CMR	Lower middle income	Official bilateral	Belgium	2016	23162.8
Cameroon	CMR	Lower middle income	Official bilateral	Belgium	2017	24135.9
Cameroon	CMR	Lower middle income	Official bilateral	Belgium	2018	20417.6
Cameroon	CMR	Lower middle income	Official bilateral	Belgium	2019	15583
Cameroon	CMR	Lower middle income	Official bilateral	China	2014	1.90434e+06
Cameroon	CMR	Lower middle income	Official bilateral	China	2015	2.13945e+06
Cameroon	CMR	Lower middle income	Official bilateral	China	2016	2.33603e+06
Cameroon	CMR	Lower middle income	Official bilateral	China	2017	2.99621e+06
Cameroon	CMR	Lower middle income	Official bilateral	China	2018	3046364
Cameroon	CMR	Lower middle income	Official bilateral	China	2019	3448534
Cameroon	CMR	Lower middle income	Official bilateral	France	2014	811041
Cameroon	CMR	Lower middle income	Official bilateral	France	2015	749830
Cameroon	CMR	Lower middle income	Official bilateral	France	2016	774695
Cameroon	CMR	Lower middle income	Official bilateral	France	2017	1.04287e+06
Cameroon	CMR	Lower middle income	Official bilateral	France	2018	1.02512e+06
Cameroon	CMR	Lower middle income	Official bilateral	France	2019	1123206
Cameroon	CMR	Lower middle income	Official bilateral	Germany	2014	54816.6
Cameroon	CMR	Lower middle income	Official bilateral	Germany	2015	34299.5
Cameroon	CMR	Lower middle income	Official bilateral	Germany	2016	30428.7
Cameroon	CMR	Lower middle income	Official bilateral	Germany	2017	33275.8
Cameroon	CMR	Lower middle income	Official bilateral	Germany	2018	30577.2
Cameroon	CMR	Lower middle income	Official bilateral	Germany	2019	28364
Cameroon	CMR	Lower middle income	Official bilateral	India	2014	35951
Cameroon	CMR	Lower middle income	Official bilateral	India	2015	33441
Cameroon	CMR	Lower middle income	Official bilateral	India	2016	30962
Cameroon	CMR	Lower middle income	Official bilateral	India	2017	47165
Cameroon	CMR	Lower middle income	Official bilateral	India	2018	44991
Cameroon	CMR	Lower middle income	Official bilateral	India	2019	50922
Cameroon	CMR	Lower middle income	Official bilateral	Japan	2014	26168.8
Cameroon	CMR	Lower middle income	Official bilateral	Japan	2015	32315.3
Cameroon	CMR	Lower middle income	Official bilateral	Japan	2016	38193.5
Cameroon	CMR	Lower middle income	Official bilateral	Japan	2017	54712.1
Cameroon	CMR	Lower middle income	Official bilateral	Japan	2018	68763
Cameroon	CMR	Lower middle income	Official bilateral	Japan	2019	86684
Cameroon	CMR	Lower middle income	Official bilateral	Kuwait	2014	27523.9
Cameroon	CMR	Lower middle income	Official bilateral	Kuwait	2015	25311.4
Cameroon	CMR	Lower middle income	Official bilateral	Kuwait	2016	23723.7
Cameroon	CMR	Lower middle income	Official bilateral	Kuwait	2017	24862.5
Cameroon	CMR	Lower middle income	Official bilateral	Kuwait	2018	22988
Cameroon	CMR	Lower middle income	Official bilateral	Kuwait	2019	20795
Cameroon	CMR	Lower middle income	Official bilateral	Norway	2014	0
Cameroon	CMR	Lower middle income	Official bilateral	Norway	2015	0
Cameroon	CMR	Lower middle income	Official bilateral	Norway	2016	0
Cameroon	CMR	Lower middle income	Official bilateral	Norway	2017	25685.4
Cameroon	CMR	Lower middle income	Official bilateral	Norway	2018	47672.1
Cameroon	CMR	Lower middle income	Official bilateral	Norway	2019	56783
Cameroon	CMR	Lower middle income	Official bilateral	Saudi Arabia	2014	5722.67
Cameroon	CMR	Lower middle income	Official bilateral	Saudi Arabia	2015	3994.13
Cameroon	CMR	Lower middle income	Official bilateral	Saudi Arabia	2016	4746.4
Cameroon	CMR	Lower middle income	Official bilateral	Saudi Arabia	2017	8753.87
Cameroon	CMR	Lower middle income	Official bilateral	Saudi Arabia	2018	10707.5
Cameroon	CMR	Lower middle income	Official bilateral	Saudi Arabia	2019	10850
Cameroon	CMR	Lower middle income	Official bilateral	Spain	2014	16902.7
Cameroon	CMR	Lower middle income	Official bilateral	Spain	2015	13356.2
Cameroon	CMR	Lower middle income	Official bilateral	Spain	2016	11189.3
Cameroon	CMR	Lower middle income	Official bilateral	Spain	2017	10745.7
Cameroon	CMR	Lower middle income	Official bilateral	Spain	2018	8374.53
Cameroon	CMR	Lower middle income	Official bilateral	Spain	2019	6361
Cameroon	CMR	Lower middle income	Official bilateral	Turkey	2014	0
Cameroon	CMR	Lower middle income	Official bilateral	Turkey	2015	0
Cameroon	CMR	Lower middle income	Official bilateral	Turkey	2016	0
Cameroon	CMR	Lower middle income	Official bilateral	Turkey	2017	17840
Cameroon	CMR	Lower middle income	Official bilateral	Turkey	2018	102005
Cameroon	CMR	Lower middle income	Official bilateral	Turkey	2019	183298
Cameroon	CMR	Lower middle income	Official bilateral	United States	2014	0
Cameroon	CMR	Lower middle income	Official bilateral	United States	2015	34809
Cameroon	CMR	Lower middle income	Official bilateral	United States	2016	89969
Cameroon	CMR	Lower middle income	Official bilateral	United States	2017	112478
Cameroon	CMR	Lower middle income	Official bilateral	United States	2018	127716
Cameroon	CMR	Lower middle income	Official bilateral	United States	2019	122100
Cameroon	CMR	Lower middle income	Official bilateral	Other bilateral	2014	21353
Cameroon	CMR	Lower middle income	Official bilateral	Other bilateral	2015	26876
Cameroon	CMR	Lower middle income	Official bilateral	Other bilateral	2016	32452
Cameroon	CMR	Lower middle income	Official bilateral	Other bilateral	2017	32452
Cameroon	CMR	Lower middle income	Official bilateral	Other bilateral	2018	32452
Cameroon	CMR	Lower middle income	Official bilateral	Other bilateral	2019	32452
Cameroon	CMR	Lower middle income	Total		2014	5.02176e+06
Cameroon	CMR	Lower middle income	Total		2015	6.09241e+06
Cameroon	CMR	Lower middle income	Total		2016	6.55469e+06
Cameroon	CMR	Lower middle income	Total		2017	8.56059e+06
Cameroon	CMR	Lower middle income	Total		2018	9.72874e+06
Cameroon	CMR	Lower middle income	Total		2019	10274734
Cameroon	CMR	Lower middle income	Non-official	Austria	2014	0
Cameroon	CMR	Lower middle income	Non-official	Austria	2015	0
Cameroon	CMR	Lower middle income	Non-official	Austria	2016	4920.54
Cameroon	CMR	Lower middle income	Non-official	Austria	2017	5996.5
Cameroon	CMR	Lower middle income	Non-official	Austria	2018	6870
Cameroon	CMR	Lower middle income	Non-official	Austria	2019	10111
Cameroon	CMR	Lower middle income	Non-official	Belgium	2014	47748.1
Cameroon	CMR	Lower middle income	Non-official	Belgium	2015	64022.1
Cameroon	CMR	Lower middle income	Non-official	Belgium	2016	58056.7
Cameroon	CMR	Lower middle income	Non-official	Belgium	2017	63104.8
Cameroon	CMR	Lower middle income	Non-official	Belgium	2018	53398.2
Cameroon	CMR	Lower middle income	Non-official	Belgium	2019	55872
Cameroon	CMR	Lower middle income	Non-official	China	2014	0
Cameroon	CMR	Lower middle income	Non-official	China	2015	0
Cameroon	CMR	Lower middle income	Non-official	China	2016	49750
Cameroon	CMR	Lower middle income	Non-official	China	2017	79837
Cameroon	CMR	Lower middle income	Non-official	China	2018	108550
Cameroon	CMR	Lower middle income	Non-official	China	2019	178080
Cameroon	CMR	Lower middle income	Non-official	France	2014	30371.9
Cameroon	CMR	Lower middle income	Non-official	France	2015	41703.7
Cameroon	CMR	Lower middle income	Non-official	France	2016	32549.6
Cameroon	CMR	Lower middle income	Non-official	France	2017	24926.2
Cameroon	CMR	Lower middle income	Non-official	France	2018	13346.1
Cameroon	CMR	Lower middle income	Non-official	France	2019	6664
Cameroon	CMR	Lower middle income	Non-official	Germany	2014	0
Cameroon	CMR	Lower middle income	Non-official	Germany	2015	40708
Cameroon	CMR	Lower middle income	Non-official	Germany	2016	33264
Cameroon	CMR	Lower middle income	Non-official	Germany	2017	26180
Cameroon	CMR	Lower middle income	Non-official	Germany	2018	26667.9
Cameroon	CMR	Lower middle income	Non-official	Germany	2019	40744
Cameroon	CMR	Lower middle income	Non-official	Spain	2014	90718.8
Cameroon	CMR	Lower middle income	Non-official	Spain	2015	83436.9
Cameroon	CMR	Lower middle income	Non-official	Spain	2016	82181.9
Cameroon	CMR	Lower middle income	Non-official	Spain	2017	83063.5
Cameroon	CMR	Lower middle income	Non-official	Spain	2018	67548.1
Cameroon	CMR	Lower middle income	Non-official	Spain	2019	1220
Cameroon	CMR	Lower middle income	Non-official	Switzerland	2014	4788.19
Cameroon	CMR	Lower middle income	Non-official	Switzerland	2015	4380.61
Cameroon	CMR	Lower middle income	Non-official	Switzerland	2016	3760.83
Cameroon	CMR	Lower middle income	Non-official	Switzerland	2017	3349.74
Cameroon	CMR	Lower middle income	Non-official	Switzerland	2018	2707.42
Cameroon	CMR	Lower middle income	Non-official	Switzerland	2019	84881
Cameroon	CMR	Lower middle income	Non-official	United Arab Emirates	2014	0
Cameroon	CMR	Lower middle income	Non-official	United Arab Emirates	2015	0
Cameroon	CMR	Lower middle income	Non-official	United Arab Emirates	2016	0
Cameroon	CMR	Lower middle income	Non-official	United Arab Emirates	2017	101587
Cameroon	CMR	Lower middle income	Non-official	United Arab Emirates	2018	221549
Cameroon	CMR	Lower middle income	Non-official	United Arab Emirates	2019	2107
Cameroon	CMR	Lower middle income	Non-official	United Kingdom	2014	0
Cameroon	CMR	Lower middle income	Non-official	United Kingdom	2015	0
Cameroon	CMR	Lower middle income	Non-official	United Kingdom	2016	0
Cameroon	CMR	Lower middle income	Non-official	United Kingdom	2017	0
Cameroon	CMR	Lower middle income	Non-official	United Kingdom	2018	26196.5
Cameroon	CMR	Lower middle income	Non-official	United Kingdom	2019	209023
Cameroon	CMR	Lower middle income	Non-official	Multiple lenders	2014	0
Cameroon	CMR	Lower middle income	Non-official	Multiple lenders	2015	0
Cameroon	CMR	Lower middle income	Non-official	Multiple lenders	2016	59
Cameroon	CMR	Lower middle income	Non-official	Multiple lenders	2017	141
Cameroon	CMR	Lower middle income	Non-official	Multiple lenders	2018	141
Cameroon	CMR	Lower middle income	Non-official	Multiple lenders	2019	45862
Cameroon	CMR	Lower middle income	Bondholders	Bond market	2014	0
Cameroon	CMR	Lower middle income	Bondholders	Bond market	2015	750000
Cameroon	CMR	Lower middle income	Bondholders	Bond market	2016	686562
Cameroon	CMR	Lower middle income	Bondholders	Bond market	2017	686562
Cameroon	CMR	Lower middle income	Bondholders	Bond market	2018	686562
Cameroon	CMR	Lower middle income	Bondholders	Bond market	2019	686562
Chad	TCD	Low income	Total Official multilateral		2014	1.47914e+06
Chad	TCD	Low income	Total Official multilateral		2015	717709
Chad	TCD	Low income	Total Official multilateral		2016	819826
Chad	TCD	Low income	Total Official multilateral		2017	1.01875e+06
Chad	TCD	Low income	Total Official multilateral		2018	1.1317e+06
Chad	TCD	Low income	Total Official multilateral		2019	1122044
Chad	TCD	Low income	Total Official bilateral		2014	726581
Chad	TCD	Low income	Total Official bilateral		2015	711609
Chad	TCD	Low income	Total Official bilateral		2016	771519
Chad	TCD	Low income	Total Official bilateral		2017	946485
Chad	TCD	Low income	Total Official bilateral		2018	946639
Chad	TCD	Low income	Total Official bilateral		2019	884321
Chad	TCD	Low income	Total Non-official		2014	1.5387e+06
Chad	TCD	Low income	Total Non-official		2015	1.53869e+06
Chad	TCD	Low income	Total Non-official		2016	1.53869e+06
Chad	TCD	Low income	Total Non-official		2017	1.5387e+06
Chad	TCD	Low income	Total Non-official		2018	1.5387e+06
Chad	TCD	Low income	Total Non-official		2019	1538617
Chad	TCD	Low income	Total Bondholders		2014	0
Chad	TCD	Low income	Total Bondholders		2015	0
Chad	TCD	Low income	Total Bondholders		2016	0
Chad	TCD	Low income	Total Bondholders		2017	0
Chad	TCD	Low income	Total Bondholders		2018	0
Chad	TCD	Low income	Total Bondholders		2019	0
Chad	TCD	Low income	Official multilateral	African Dev. Bank	2014	339649
Chad	TCD	Low income	Official multilateral	African Dev. Bank	2015	96717.1
Chad	TCD	Low income	Official multilateral	African Dev. Bank	2016	102911
Chad	TCD	Low income	Official multilateral	African Dev. Bank	2017	128312
Chad	TCD	Low income	Official multilateral	African Dev. Bank	2018	128173
Chad	TCD	Low income	Official multilateral	African Dev. Bank	2019	127801
Chad	TCD	Low income	Official multilateral	Asian Dev. Bank	2014	0
Chad	TCD	Low income	Official multilateral	Asian Dev. Bank	2015	0
Chad	TCD	Low income	Official multilateral	Asian Dev. Bank	2016	0
Chad	TCD	Low income	Official multilateral	Asian Dev. Bank	2017	0
Chad	TCD	Low income	Official multilateral	Asian Dev. Bank	2018	0
Chad	TCD	Low income	Official multilateral	Asian Dev. Bank	2019	0
Chad	TCD	Low income	Official multilateral	Inter-American Dev. Bank	2014	0
Chad	TCD	Low income	Official multilateral	Inter-American Dev. Bank	2015	0
Chad	TCD	Low income	Official multilateral	Inter-American Dev. Bank	2016	0
Chad	TCD	Low income	Official multilateral	Inter-American Dev. Bank	2017	0
Chad	TCD	Low income	Official multilateral	Inter-American Dev. Bank	2018	0
Chad	TCD	Low income	Official multilateral	Inter-American Dev. Bank	2019	0
Chad	TCD	Low income	Official multilateral	International Monetary Fund	2014	97578.8
Chad	TCD	Low income	Official multilateral	International Monetary Fund	2015	137268
Chad	TCD	Low income	Official multilateral	International Monetary Fund	2016	192869
Chad	TCD	Low income	Official multilateral	International Monetary Fund	2017	254234
Chad	TCD	Low income	Official multilateral	International Monetary Fund	2018	394523
Chad	TCD	Low income	Official multilateral	International Monetary Fund	2019	469812
Chad	TCD	Low income	Official multilateral	World Bank-IBRD	2014	0
Chad	TCD	Low income	Official multilateral	World Bank-IBRD	2015	0
Chad	TCD	Low income	Official multilateral	World Bank-IBRD	2016	0
Chad	TCD	Low income	Official multilateral	World Bank-IBRD	2017	0
Chad	TCD	Low income	Official multilateral	World Bank-IBRD	2018	0
Chad	TCD	Low income	Official multilateral	World Bank-IBRD	2019	0
Chad	TCD	Low income	Official multilateral	World Bank-IDA	2014	747069
Chad	TCD	Low income	Official multilateral	World Bank-IDA	2015	187166
Chad	TCD	Low income	Official multilateral	World Bank-IDA	2016	179970
Chad	TCD	Low income	Official multilateral	World Bank-IDA	2017	188823
Chad	TCD	Low income	Official multilateral	World Bank-IDA	2018	180749
Chad	TCD	Low income	Official multilateral	World Bank-IDA	2019	176194
Chad	TCD	Low income	Official multilateral	Other multilateral	2014	294843
Chad	TCD	Low income	Official multilateral	Other multilateral	2015	296558
Chad	TCD	Low income	Official multilateral	Other multilateral	2016	344076
Chad	TCD	Low income	Official multilateral	Other multilateral	2017	447379
Chad	TCD	Low income	Official multilateral	Other multilateral	2018	428255
Chad	TCD	Low income	Official multilateral	Other multilateral	2019	348237
Chad	TCD	Low income	Total		2014	3.74442e+06
Chad	TCD	Low income	Total		2015	2.96801e+06
Chad	TCD	Low income	Total		2016	3.13003e+06
Chad	TCD	Low income	Total		2017	3.50393e+06
Chad	TCD	Low income	Total		2018	3.61703e+06
Chad	TCD	Low income	Total		2019	3075170
Chad	TCD	Low income	Official bilateral	China	2014	264970
Chad	TCD	Low income	Official bilateral	China	2015	258804
Chad	TCD	Low income	Official bilateral	China	2016	267876
Chad	TCD	Low income	Official bilateral	China	2017	273639
Chad	TCD	Low income	Official bilateral	China	2018	259817
Chad	TCD	Low income	Official bilateral	China	2019	235247
Chad	TCD	Low income	Official bilateral	France	2014	17024.1
Chad	TCD	Low income	Official bilateral	France	2015	15265.8
Chad	TCD	Low income	Official bilateral	France	2016	14780.6
Chad	TCD	Low income	Official bilateral	France	2017	64788.6
Chad	TCD	Low income	Official bilateral	France	2018	107655
Chad	TCD	Low income	Official bilateral	France	2019	89894
Chad	TCD	Low income	Official bilateral	Germany	2014	269.53
Chad	TCD	Low income	Official bilateral	Germany	2015	241.69
Chad	TCD	Low income	Official bilateral	Germany	2016	233.97
Chad	TCD	Low income	Official bilateral	Germany	2017	266.2
Chad	TCD	Low income	Official bilateral	Germany	2018	254.15
Chad	TCD	Low income	Official bilateral	Germany	2019	0
Chad	TCD	Low income	Official bilateral	India	2014	39715
Chad	TCD	Low income	Official bilateral	India	2015	45384
Chad	TCD	Low income	Official bilateral	India	2016	49620
Chad	TCD	Low income	Official bilateral	India	2017	49620
Chad	TCD	Low income	Official bilateral	India	2018	47793
Chad	TCD	Low income	Official bilateral	India	2019	47793
Chad	TCD	Low income	Official bilateral	Italy	2014	2723.23
Chad	TCD	Low income	Official bilateral	Italy	2015	2441.95
Chad	TCD	Low income	Official bilateral	Italy	2016	2364.35
Chad	TCD	Low income	Official bilateral	Italy	2017	2690.03
Chad	TCD	Low income	Official bilateral	Italy	2018	2568.24
Chad	TCD	Low income	Official bilateral	Italy	2019	0
Chad	TCD	Low income	Official bilateral	Kuwait	2014	33288.9
Chad	TCD	Low income	Official bilateral	Kuwait	2015	31486.1
Chad	TCD	Low income	Official bilateral	Kuwait	2016	33359.5
Chad	TCD	Low income	Official bilateral	Kuwait	2017	33342.2
Chad	TCD	Low income	Official bilateral	Kuwait	2018	32508.7
Chad	TCD	Low income	Official bilateral	Kuwait	2019	5455
Chad	TCD	Low income	Official bilateral	Libya	2014	262500
Chad	TCD	Low income	Official bilateral	Libya	2015	262500
Chad	TCD	Low income	Official bilateral	Libya	2016	262500
Chad	TCD	Low income	Official bilateral	Libya	2017	262500
Chad	TCD	Low income	Official bilateral	Libya	2018	250936
Chad	TCD	Low income	Official bilateral	Libya	2019	245780
Chad	TCD	Low income	Official bilateral	Netherlands	2014	322.95
Chad	TCD	Low income	Official bilateral	Netherlands	2015	289.59
Chad	TCD	Low income	Official bilateral	Netherlands	2016	280.39
Chad	TCD	Low income	Official bilateral	Netherlands	2017	319.01
Chad	TCD	Low income	Official bilateral	Netherlands	2018	304.57
Chad	TCD	Low income	Official bilateral	Netherlands	2019	0
Chad	TCD	Low income	Official bilateral	Saudi Arabia	2014	2776.8
Chad	TCD	Low income	Official bilateral	Saudi Arabia	2015	2720
Chad	TCD	Low income	Official bilateral	Saudi Arabia	2016	2720
Chad	TCD	Low income	Official bilateral	Saudi Arabia	2017	2720
Chad	TCD	Low income	Official bilateral	Saudi Arabia	2018	2720
Chad	TCD	Low income	Official bilateral	Saudi Arabia	2019	2720
Chad	TCD	Low income	Official bilateral	Other bilateral	2014	102991
Chad	TCD	Low income	Official bilateral	Other bilateral	2015	92476.2
Chad	TCD	Low income	Official bilateral	Other bilateral	2016	137784
Chad	TCD	Low income	Official bilateral	Other bilateral	2017	256599
Chad	TCD	Low income	Official bilateral	Other bilateral	2018	242082
Chad	TCD	Low income	Official bilateral	Other bilateral	2019	238232
Chad	TCD	Low income	Non-official	Netherlands	2014	83.77
Chad	TCD	Low income	Non-official	Netherlands	2015	75.12
Chad	TCD	Low income	Non-official	Netherlands	2016	72.73
Chad	TCD	Low income	Non-official	Netherlands	2017	82.75
Chad	TCD	Low income	Non-official	Netherlands	2018	79.01
Chad	TCD	Low income	Non-official	Netherlands	2019	0
Chad	TCD	Low income	Non-official	Saudi Arabia	2014	3000
Chad	TCD	Low income	Non-official	Saudi Arabia	2015	3000
Chad	TCD	Low income	Non-official	Saudi Arabia	2016	3000
Chad	TCD	Low income	Non-official	Saudi Arabia	2017	3000
Chad	TCD	Low income	Non-official	Saudi Arabia	2018	3000
Chad	TCD	Low income	Non-official	Saudi Arabia	2019	3000
Chad	TCD	Low income	Non-official	United Kingdom	2014	1535617
Chad	TCD	Low income	Non-official	United Kingdom	2015	1535617
Chad	TCD	Low income	Non-official	United Kingdom	2016	1535617
Chad	TCD	Low income	Non-official	United Kingdom	2017	1535617
Chad	TCD	Low income	Non-official	United Kingdom	2018	1535617
Chad	TCD	Low income	Non-official	United Kingdom	2019	1535617
Comoros	COM	Lower middle income	Total Official multilateral		2014	91043.5
Comoros	COM	Lower middle income	Total Official multilateral		2015	86133.5
Comoros	COM	Lower middle income	Total Official multilateral		2016	79780.7
Comoros	COM	Lower middle income	Total Official multilateral		2017	80270.1
Comoros	COM	Lower middle income	Total Official multilateral		2018	76315.6
Comoros	COM	Lower middle income	Total Official multilateral		2019	98779
Comoros	COM	Lower middle income	Total Official bilateral		2014	49110.6
Comoros	COM	Lower middle income	Total Official bilateral		2015	42956.1
Comoros	COM	Lower middle income	Total Official bilateral		2016	109278
Comoros	COM	Lower middle income	Total Official bilateral		2017	115842
Comoros	COM	Lower middle income	Total Official bilateral		2018	178043
Comoros	COM	Lower middle income	Total Official bilateral		2019	175283
Comoros	COM	Lower middle income	Total Non-official		2014	0
Comoros	COM	Lower middle income	Total Non-official		2015	0
Comoros	COM	Lower middle income	Total Non-official		2016	0
Comoros	COM	Lower middle income	Total Non-official		2017	0
Comoros	COM	Lower middle income	Total Non-official		2018	0
Comoros	COM	Lower middle income	Total Non-official		2019	0
Comoros	COM	Lower middle income	Total Bondholders		2014	0
Comoros	COM	Lower middle income	Total Bondholders		2015	0
Comoros	COM	Lower middle income	Total Bondholders		2016	0
Comoros	COM	Lower middle income	Total Bondholders		2017	0
Comoros	COM	Lower middle income	Total Bondholders		2018	0
Comoros	COM	Lower middle income	Total Bondholders		2019	0
Comoros	COM	Lower middle income	Official multilateral	African Dev. Bank	2014	0
Comoros	COM	Lower middle income	Official multilateral	African Dev. Bank	2015	0
Comoros	COM	Lower middle income	Official multilateral	African Dev. Bank	2016	0
Comoros	COM	Lower middle income	Official multilateral	African Dev. Bank	2017	0
Comoros	COM	Lower middle income	Official multilateral	African Dev. Bank	2018	728.77
Comoros	COM	Lower middle income	Official multilateral	African Dev. Bank	2019	1521
Comoros	COM	Lower middle income	Official multilateral	Asian Dev. Bank	2014	0
Comoros	COM	Lower middle income	Official multilateral	Asian Dev. Bank	2015	0
Comoros	COM	Lower middle income	Official multilateral	Asian Dev. Bank	2016	0
Comoros	COM	Lower middle income	Official multilateral	Asian Dev. Bank	2017	0
Comoros	COM	Lower middle income	Official multilateral	Asian Dev. Bank	2018	0
Comoros	COM	Lower middle income	Official multilateral	Asian Dev. Bank	2019	0
Comoros	COM	Lower middle income	Official multilateral	Inter-American Dev. Bank	2014	0
Comoros	COM	Lower middle income	Official multilateral	Inter-American Dev. Bank	2015	0
Comoros	COM	Lower middle income	Official multilateral	Inter-American Dev. Bank	2016	0
Comoros	COM	Lower middle income	Official multilateral	Inter-American Dev. Bank	2017	0
Comoros	COM	Lower middle income	Official multilateral	Inter-American Dev. Bank	2018	0
Comoros	COM	Lower middle income	Official multilateral	Inter-American Dev. Bank	2019	0
Comoros	COM	Lower middle income	Official multilateral	International Monetary Fund	2014	30907.5
Comoros	COM	Lower middle income	Official multilateral	International Monetary Fund	2015	29202.9
Comoros	COM	Lower middle income	Official multilateral	International Monetary Fund	2016	26566.7
Comoros	COM	Lower middle income	Official multilateral	International Monetary Fund	2017	26051.7
Comoros	COM	Lower middle income	Official multilateral	International Monetary Fund	2018	22316.6
Comoros	COM	Lower middle income	Official multilateral	International Monetary Fund	2019	30742
Comoros	COM	Lower middle income	Official multilateral	World Bank-IBRD	2014	0
Comoros	COM	Lower middle income	Official multilateral	World Bank-IBRD	2015	0
Comoros	COM	Lower middle income	Official multilateral	World Bank-IBRD	2016	0
Comoros	COM	Lower middle income	Official multilateral	World Bank-IBRD	2017	0
Comoros	COM	Lower middle income	Official multilateral	World Bank-IBRD	2018	0
Comoros	COM	Lower middle income	Official multilateral	World Bank-IBRD	2019	0
Comoros	COM	Lower middle income	Official multilateral	World Bank-IDA	2014	14448
Comoros	COM	Lower middle income	Official multilateral	World Bank-IDA	2015	13535
Comoros	COM	Lower middle income	Official multilateral	World Bank-IDA	2016	12856
Comoros	COM	Lower middle income	Official multilateral	World Bank-IDA	2017	13328
Comoros	COM	Lower middle income	Official multilateral	World Bank-IDA	2018	12709
Comoros	COM	Lower middle income	Official multilateral	World Bank-IDA	2019	12320
Comoros	COM	Lower middle income	Official multilateral	Other multilateral	2014	45688.1
Comoros	COM	Lower middle income	Official multilateral	Other multilateral	2015	43395.6
Comoros	COM	Lower middle income	Official multilateral	Other multilateral	2016	40358
Comoros	COM	Lower middle income	Official multilateral	Other multilateral	2017	40890.4
Comoros	COM	Lower middle income	Official multilateral	Other multilateral	2018	40561.1
Comoros	COM	Lower middle income	Official multilateral	Other multilateral	2019	54196
Comoros	COM	Lower middle income	Total		2014	140154
Comoros	COM	Lower middle income	Total		2015	129090
Comoros	COM	Lower middle income	Total		2016	189058
Comoros	COM	Lower middle income	Total		2017	196112
Comoros	COM	Lower middle income	Total		2018	254358
Comoros	COM	Lower middle income	Total		2019	243321
Comoros	COM	Lower middle income	Official bilateral	China	2014	0
Comoros	COM	Lower middle income	Official bilateral	China	2015	0
Comoros	COM	Lower middle income	Official bilateral	China	2016	29642.9
Comoros	COM	Lower middle income	Official bilateral	China	2017	30055.9
Comoros	COM	Lower middle income	Official bilateral	China	2018	79194.2
Comoros	COM	Lower middle income	Official bilateral	China	2019	77727
Comoros	COM	Lower middle income	Official bilateral	France	2014	8082.67
Comoros	COM	Lower middle income	Official bilateral	France	2015	7760.14
Comoros	COM	Lower middle income	Official bilateral	France	2016	7671.15
Comoros	COM	Lower middle income	Official bilateral	France	2017	8044.6
Comoros	COM	Lower middle income	Official bilateral	France	2018	7904.94
Comoros	COM	Lower middle income	Official bilateral	France	2019	7512
Comoros	COM	Lower middle income	Official bilateral	India	2014	0
Comoros	COM	Lower middle income	Official bilateral	India	2015	0
Comoros	COM	Lower middle income	Official bilateral	India	2016	36984
Comoros	COM	Lower middle income	Official bilateral	India	2017	36984
Comoros	COM	Lower middle income	Official bilateral	India	2018	36984
Comoros	COM	Lower middle income	Official bilateral	India	2019	36984
Comoros	COM	Lower middle income	Official bilateral	Kuwait	2014	25888
Comoros	COM	Lower middle income	Official bilateral	Kuwait	2015	24978.6
Comoros	COM	Lower middle income	Official bilateral	Kuwait	2016	24762.4
Comoros	COM	Lower middle income	Official bilateral	Kuwait	2017	25111
Comoros	COM	Lower middle income	Official bilateral	Kuwait	2018	24974.5
Comoros	COM	Lower middle income	Official bilateral	Kuwait	2019	25016
Comoros	COM	Lower middle income	Official bilateral	Saudi Arabia	2014	14144
Comoros	COM	Lower middle income	Official bilateral	Saudi Arabia	2015	9221.33
Comoros	COM	Lower middle income	Official bilateral	Saudi Arabia	2016	9221.33
Comoros	COM	Lower middle income	Official bilateral	Saudi Arabia	2017	14705.6
Comoros	COM	Lower middle income	Official bilateral	Saudi Arabia	2018	28044.3
Comoros	COM	Lower middle income	Official bilateral	Saudi Arabia	2019	0
Comoros	COM	Lower middle income	Official bilateral	Other bilateral	2014	996
Comoros	COM	Lower middle income	Official bilateral	Other bilateral	2015	996
Comoros	COM	Lower middle income	Official bilateral	Other bilateral	2016	996
Comoros	COM	Lower middle income	Official bilateral	Other bilateral	2017	941
Comoros	COM	Lower middle income	Official bilateral	Other bilateral	2018	941
Comoros	COM	Lower middle income	Official bilateral	Other bilateral	2019	28044
Congo, Rep.	COG	Lower middle income	Total Official multilateral		2014	312892
Congo, Rep.	COG	Lower middle income	Total Official multilateral		2015	311701
Congo, Rep.	COG	Lower middle income	Total Official multilateral		2016	349998
Congo, Rep.	COG	Lower middle income	Total Official multilateral		2017	784956
Congo, Rep.	COG	Lower middle income	Total Official multilateral		2018	777261
Congo, Rep.	COG	Lower middle income	Total Official multilateral		2019	1051156
Congo, Rep.	COG	Lower middle income	Total Official bilateral		2014	2.24758e+06
Congo, Rep.	COG	Lower middle income	Total Official bilateral		2015	2.16902e+06
Congo, Rep.	COG	Lower middle income	Total Official bilateral		2016	2.15468e+06
Congo, Rep.	COG	Lower middle income	Total Official bilateral		2017	2.76659e+06
Congo, Rep.	COG	Lower middle income	Total Official bilateral		2018	3.04664e+06
Congo, Rep.	COG	Lower middle income	Total Official bilateral		2019	4534600
Congo, Rep.	COG	Lower middle income	Total Non-official		2014	715224
Congo, Rep.	COG	Lower middle income	Total Non-official		2015	694007
Congo, Rep.	COG	Lower middle income	Total Non-official		2016	690703
Congo, Rep.	COG	Lower middle income	Total Non-official		2017	700561
Congo, Rep.	COG	Lower middle income	Total Non-official		2018	696403
Congo, Rep.	COG	Lower middle income	Total Non-official		2019	77411
Congo, Rep.	COG	Lower middle income	Total Bondholders		2014	417588
Congo, Rep.	COG	Lower middle income	Total Bondholders		2015	399432
Congo, Rep.	COG	Lower middle income	Total Bondholders		2016	376737
Congo, Rep.	COG	Lower middle income	Total Bondholders		2017	349503
Congo, Rep.	COG	Lower middle income	Total Bondholders		2018	322269
Congo, Rep.	COG	Lower middle income	Total Bondholders		2019	295035
Congo, Rep.	COG	Lower middle income	Total		2014	3.69328e+06
Congo, Rep.	COG	Lower middle income	Total		2015	3.57416e+06
Congo, Rep.	COG	Lower middle income	Total		2016	3.57212e+06
Congo, Rep.	COG	Lower middle income	Total		2017	4.60161e+06
Congo, Rep.	COG	Lower middle income	Total		2018	4.84257e+06
Congo, Rep.	COG	Lower middle income	Total		2019	5801030
Congo, Rep.	COG	Lower middle income	Official multilateral	African Dev. Bank	2014	10259
Congo, Rep.	COG	Lower middle income	Official multilateral	African Dev. Bank	2015	9391.1
Congo, Rep.	COG	Lower middle income	Official multilateral	African Dev. Bank	2016	14016
Congo, Rep.	COG	Lower middle income	Official multilateral	African Dev. Bank	2017	53563.1
Congo, Rep.	COG	Lower middle income	Official multilateral	African Dev. Bank	2018	84950.9
Congo, Rep.	COG	Lower middle income	Official multilateral	African Dev. Bank	2019	358220
Congo, Rep.	COG	Lower middle income	Official multilateral	Asian Dev. Bank	2014	0
Congo, Rep.	COG	Lower middle income	Official multilateral	Asian Dev. Bank	2015	0
Congo, Rep.	COG	Lower middle income	Official multilateral	Asian Dev. Bank	2016	0
Congo, Rep.	COG	Lower middle income	Official multilateral	Asian Dev. Bank	2017	0
Congo, Rep.	COG	Lower middle income	Official multilateral	Asian Dev. Bank	2018	0
Congo, Rep.	COG	Lower middle income	Official multilateral	Asian Dev. Bank	2019	0
Congo, Rep.	COG	Lower middle income	Official multilateral	Inter-American Dev. Bank	2014	0
Congo, Rep.	COG	Lower middle income	Official multilateral	Inter-American Dev. Bank	2015	0
Congo, Rep.	COG	Lower middle income	Official multilateral	Inter-American Dev. Bank	2016	0
Congo, Rep.	COG	Lower middle income	Official multilateral	Inter-American Dev. Bank	2017	0
Congo, Rep.	COG	Lower middle income	Official multilateral	Inter-American Dev. Bank	2018	0
Congo, Rep.	COG	Lower middle income	Official multilateral	Inter-American Dev. Bank	2019	0
Congo, Rep.	COG	Lower middle income	Official multilateral	International Monetary Fund	2014	134018
Congo, Rep.	COG	Lower middle income	Official multilateral	International Monetary Fund	2015	122821
Congo, Rep.	COG	Lower middle income	Official multilateral	International Monetary Fund	2016	115578
Congo, Rep.	COG	Lower middle income	Official multilateral	International Monetary Fund	2017	120029
Congo, Rep.	COG	Lower middle income	Official multilateral	International Monetary Fund	2018	114865
Congo, Rep.	COG	Lower middle income	Official multilateral	International Monetary Fund	2019	157172
Congo, Rep.	COG	Lower middle income	Official multilateral	World Bank-IBRD	2014	0
Congo, Rep.	COG	Lower middle income	Official multilateral	World Bank-IBRD	2015	112
Congo, Rep.	COG	Lower middle income	Official multilateral	World Bank-IBRD	2016	4079
Congo, Rep.	COG	Lower middle income	Official multilateral	World Bank-IBRD	2017	8886
Congo, Rep.	COG	Lower middle income	Official multilateral	World Bank-IBRD	2018	24591
Congo, Rep.	COG	Lower middle income	Official multilateral	World Bank-IBRD	2019	46471
Congo, Rep.	COG	Lower middle income	Official multilateral	World Bank-IDA	2014	103992
Congo, Rep.	COG	Lower middle income	Official multilateral	World Bank-IDA	2015	109683
Congo, Rep.	COG	Lower middle income	Official multilateral	World Bank-IDA	2016	117745
Congo, Rep.	COG	Lower middle income	Official multilateral	World Bank-IDA	2017	143658
Congo, Rep.	COG	Lower middle income	Official multilateral	World Bank-IDA	2018	166922
Congo, Rep.	COG	Lower middle income	Official multilateral	World Bank-IDA	2019	196725
Congo, Rep.	COG	Lower middle income	Official multilateral	Other multilateral	2014	64623
Congo, Rep.	COG	Lower middle income	Official multilateral	Other multilateral	2015	69693.7
Congo, Rep.	COG	Lower middle income	Official multilateral	Other multilateral	2016	98580.6
Congo, Rep.	COG	Lower middle income	Official multilateral	Other multilateral	2017	458820
Congo, Rep.	COG	Lower middle income	Official multilateral	Other multilateral	2018	385932
Congo, Rep.	COG	Lower middle income	Official multilateral	Other multilateral	2019	292569
Congo, Rep.	COG	Lower middle income	Official bilateral	China	2014	1.60075e+06
Congo, Rep.	COG	Lower middle income	Official bilateral	China	2015	1.56767e+06
Congo, Rep.	COG	Lower middle income	Official bilateral	China	2016	1.58653e+06
Congo, Rep.	COG	Lower middle income	Official bilateral	China	2017	1900682
Congo, Rep.	COG	Lower middle income	Official bilateral	China	2018	2.18878e+06
Congo, Rep.	COG	Lower middle income	Official bilateral	China	2019	3751870
Congo, Rep.	COG	Lower middle income	Official bilateral	France	2014	181394
Congo, Rep.	COG	Lower middle income	Official bilateral	France	2015	131420
Congo, Rep.	COG	Lower middle income	Official bilateral	France	2016	101076
Congo, Rep.	COG	Lower middle income	Official bilateral	France	2017	99167.7
Congo, Rep.	COG	Lower middle income	Official bilateral	France	2018	115513
Congo, Rep.	COG	Lower middle income	Official bilateral	France	2019	165241
Congo, Rep.	COG	Lower middle income	Official bilateral	India	2014	40169
Congo, Rep.	COG	Lower middle income	Official bilateral	India	2015	48124
Congo, Rep.	COG	Lower middle income	Official bilateral	India	2016	54686
Congo, Rep.	COG	Lower middle income	Official bilateral	India	2017	79309
Congo, Rep.	COG	Lower middle income	Official bilateral	India	2018	83489
Congo, Rep.	COG	Lower middle income	Official bilateral	India	2019	95841
Congo, Rep.	COG	Lower middle income	Official bilateral	Kuwait	2014	56612
Congo, Rep.	COG	Lower middle income	Official bilateral	Kuwait	2015	54616.3
Congo, Rep.	COG	Lower middle income	Official bilateral	Kuwait	2016	54143.4
Congo, Rep.	COG	Lower middle income	Official bilateral	Kuwait	2017	54905.6
Congo, Rep.	COG	Lower middle income	Official bilateral	Kuwait	2018	54607.1
Congo, Rep.	COG	Lower middle income	Official bilateral	Kuwait	2019	54697
Congo, Rep.	COG	Lower middle income	Official bilateral	Saudi Arabia	2014	39786.4
Congo, Rep.	COG	Lower middle income	Official bilateral	Saudi Arabia	2015	39786.4
Congo, Rep.	COG	Lower middle income	Official bilateral	Saudi Arabia	2016	39786.4
Congo, Rep.	COG	Lower middle income	Official bilateral	Saudi Arabia	2017	118438
Congo, Rep.	COG	Lower middle income	Official bilateral	Saudi Arabia	2018	118438
Congo, Rep.	COG	Lower middle income	Official bilateral	Saudi Arabia	2019	224779
Congo, Rep.	COG	Lower middle income	Official bilateral	Turkey	2014	0
Congo, Rep.	COG	Lower middle income	Official bilateral	Turkey	2015	0
Congo, Rep.	COG	Lower middle income	Official bilateral	Turkey	2016	0
Congo, Rep.	COG	Lower middle income	Official bilateral	Turkey	2017	211477
Congo, Rep.	COG	Lower middle income	Official bilateral	Turkey	2018	201902
Congo, Rep.	COG	Lower middle income	Official bilateral	Turkey	2019	78652
Congo, Rep.	COG	Lower middle income	Official bilateral	United Arab Emirates	2014	9534.1
Congo, Rep.	COG	Lower middle income	Official bilateral	United Arab Emirates	2015	9534.1
Congo, Rep.	COG	Lower middle income	Official bilateral	United Arab Emirates	2016	9534.1
Congo, Rep.	COG	Lower middle income	Official bilateral	United Arab Emirates	2017	9534.1
Congo, Rep.	COG	Lower middle income	Official bilateral	United Arab Emirates	2018	9534.1
Congo, Rep.	COG	Lower middle income	Official bilateral	United Arab Emirates	2019	74930
Congo, Rep.	COG	Lower middle income	Official bilateral	United Kingdom	2014	651.97
Congo, Rep.	COG	Lower middle income	Official bilateral	United Kingdom	2015	389.75
Congo, Rep.	COG	Lower middle income	Official bilateral	United Kingdom	2016	377.37
Congo, Rep.	COG	Lower middle income	Official bilateral	United Kingdom	2017	429.35
Congo, Rep.	COG	Lower middle income	Official bilateral	United Kingdom	2018	409.91
Congo, Rep.	COG	Lower middle income	Official bilateral	United Kingdom	2019	9534
Congo, Rep.	COG	Lower middle income	Official bilateral	Multiple lenders	2014	290043
Congo, Rep.	COG	Lower middle income	Official bilateral	Multiple lenders	2015	288850
Congo, Rep.	COG	Lower middle income	Official bilateral	Multiple lenders	2016	279917
Congo, Rep.	COG	Lower middle income	Official bilateral	Multiple lenders	2017	264015
Congo, Rep.	COG	Lower middle income	Official bilateral	Multiple lenders	2018	245325
Congo, Rep.	COG	Lower middle income	Official bilateral	Multiple lenders	2019	402
Congo, Rep.	COG	Lower middle income	Official bilateral	Other bilateral	2014	28636
Congo, Rep.	COG	Lower middle income	Official bilateral	Other bilateral	2015	28636
Congo, Rep.	COG	Lower middle income	Official bilateral	Other bilateral	2016	28636
Congo, Rep.	COG	Lower middle income	Official bilateral	Other bilateral	2017	28636
Congo, Rep.	COG	Lower middle income	Official bilateral	Other bilateral	2018	28636
Congo, Rep.	COG	Lower middle income	Official bilateral	Other bilateral	2019	28636
Congo, Rep.	COG	Lower middle income	Non-official	Belgium	2014	456.5
Congo, Rep.	COG	Lower middle income	Non-official	Belgium	2015	273.26
Congo, Rep.	COG	Lower middle income	Non-official	Belgium	2016	264.58
Congo, Rep.	COG	Lower middle income	Non-official	Belgium	2017	301.02
Congo, Rep.	COG	Lower middle income	Non-official	Belgium	2018	287.4
Congo, Rep.	COG	Lower middle income	Non-official	Belgium	2019	282
Congo, Rep.	COG	Lower middle income	Non-official	Brazil	2014	65007
Congo, Rep.	COG	Lower middle income	Non-official	Brazil	2015	54656
Congo, Rep.	COG	Lower middle income	Non-official	Brazil	2016	54308
Congo, Rep.	COG	Lower middle income	Non-official	Brazil	2017	53960
Congo, Rep.	COG	Lower middle income	Non-official	Brazil	2018	53612
Congo, Rep.	COG	Lower middle income	Non-official	Brazil	2019	1652
Congo, Rep.	COG	Lower middle income	Non-official	France	2014	10227.6
Congo, Rep.	COG	Lower middle income	Non-official	France	2015	8150.08
Congo, Rep.	COG	Lower middle income	Non-official	France	2016	7672.77
Congo, Rep.	COG	Lower middle income	Non-official	France	2017	8610.88
Congo, Rep.	COG	Lower middle income	Non-official	France	2018	8266.99
Congo, Rep.	COG	Lower middle income	Non-official	France	2019	5336
Congo, Rep.	COG	Lower middle income	Non-official	Italy	2014	1806.58
Congo, Rep.	COG	Lower middle income	Non-official	Italy	2015	1079.99
Congo, Rep.	COG	Lower middle income	Non-official	Italy	2016	784.25
Congo, Rep.	COG	Lower middle income	Non-official	Italy	2017	892.28
Congo, Rep.	COG	Lower middle income	Non-official	Italy	2018	851.88
Congo, Rep.	COG	Lower middle income	Non-official	Italy	2019	95
Congo, Rep.	COG	Lower middle income	Non-official	Lebanon	2014	76283.4
Congo, Rep.	COG	Lower middle income	Non-official	Lebanon	2015	68404.3
Congo, Rep.	COG	Lower middle income	Non-official	Lebanon	2016	66230.4
Congo, Rep.	COG	Lower middle income	Non-official	Lebanon	2017	75353.5
Congo, Rep.	COG	Lower middle income	Non-official	Lebanon	2018	71941.7
Congo, Rep.	COG	Lower middle income	Non-official	Lebanon	2019	0
Congo, Rep.	COG	Lower middle income	Non-official	Switzerland	2014	1072
Congo, Rep.	COG	Lower middle income	Non-official	Switzerland	2015	1072
Congo, Rep.	COG	Lower middle income	Non-official	Switzerland	2016	1072
Congo, Rep.	COG	Lower middle income	Non-official	Switzerland	2017	1072
Congo, Rep.	COG	Lower middle income	Non-official	Switzerland	2018	1072
Congo, Rep.	COG	Lower middle income	Non-official	Switzerland	2019	0
Congo, Rep.	COG	Lower middle income	Non-official	Multiple lenders	2014	560371
Congo, Rep.	COG	Lower middle income	Non-official	Multiple lenders	2015	560371
Congo, Rep.	COG	Lower middle income	Non-official	Multiple lenders	2016	560371
Congo, Rep.	COG	Lower middle income	Non-official	Multiple lenders	2017	560371
Congo, Rep.	COG	Lower middle income	Non-official	Multiple lenders	2018	560371
Congo, Rep.	COG	Lower middle income	Non-official	Multiple lenders	2019	70046
Congo, Rep.	COG	Lower middle income	Bondholders	Bond market	2014	417588
Congo, Rep.	COG	Lower middle income	Bondholders	Bond market	2015	399432
Congo, Rep.	COG	Lower middle income	Bondholders	Bond market	2016	376737
Congo, Rep.	COG	Lower middle income	Bondholders	Bond market	2017	349503
Congo, Rep.	COG	Lower middle income	Bondholders	Bond market	2018	322269
Congo, Rep.	COG	Lower middle income	Bondholders	Bond market	2019	295035
Côte d'Ivoire	CIV	Lower middle income	Total		2014	8.11133e+06
Côte d'Ivoire	CIV	Lower middle income	Total		2015	1.00181e+07
Côte d'Ivoire	CIV	Lower middle income	Total		2016	9.86373e+06
Côte d'Ivoire	CIV	Lower middle income	Total		2017	1.2183e+07
Côte d'Ivoire	CIV	Lower middle income	Total		2018	1.45101e+07
Côte d'Ivoire	CIV	Lower middle income	Total		2019	15098716
Côte d'Ivoire	CIV	Lower middle income	Total Official multilateral		2014	2.24112e+06
Côte d'Ivoire	CIV	Lower middle income	Total Official multilateral		2015	2.40099e+06
Côte d'Ivoire	CIV	Lower middle income	Total Official multilateral		2016	2.51304e+06
Côte d'Ivoire	CIV	Lower middle income	Total Official multilateral		2017	3.31988e+06
Côte d'Ivoire	CIV	Lower middle income	Total Official multilateral		2018	3.82472e+06
Côte d'Ivoire	CIV	Lower middle income	Total Official multilateral		2019	4507193
Côte d'Ivoire	CIV	Lower middle income	Total Official bilateral		2014	2.72576e+06
Côte d'Ivoire	CIV	Lower middle income	Total Official bilateral		2015	3.48148e+06
Côte d'Ivoire	CIV	Lower middle income	Total Official bilateral		2016	3.08726e+06
Côte d'Ivoire	CIV	Lower middle income	Total Official bilateral		2017	3.42533e+06
Côte d'Ivoire	CIV	Lower middle income	Total Official bilateral		2018	3.18215e+06
Côte d'Ivoire	CIV	Lower middle income	Total Official bilateral		2019	3409667
Côte d'Ivoire	CIV	Lower middle income	Total Non-official		2014	59534.4
Côte d'Ivoire	CIV	Lower middle income	Total Non-official		2015	51000
Côte d'Ivoire	CIV	Lower middle income	Total Non-official		2016	42500
Côte d'Ivoire	CIV	Lower middle income	Total Non-official		2017	40009.7
Côte d'Ivoire	CIV	Lower middle income	Total Non-official		2018	273212
Côte d'Ivoire	CIV	Lower middle income	Total Non-official		2019	1507692
Côte d'Ivoire	CIV	Lower middle income	Total Bondholders		2014	3.08493e+06
Côte d'Ivoire	CIV	Lower middle income	Total Bondholders		2015	4.08464e+06
Côte d'Ivoire	CIV	Lower middle income	Total Bondholders		2016	4.22094e+06
Côte d'Ivoire	CIV	Lower middle income	Total Bondholders		2017	5.39779e+06
Côte d'Ivoire	CIV	Lower middle income	Total Bondholders		2018	7230006
Côte d'Ivoire	CIV	Lower middle income	Total Bondholders		2019	7588982
Côte d'Ivoire	CIV	Lower middle income	Official multilateral	African Dev. Bank	2014	43767.1
Côte d'Ivoire	CIV	Lower middle income	Official multilateral	African Dev. Bank	2015	46967.9
Côte d'Ivoire	CIV	Lower middle income	Official multilateral	African Dev. Bank	2016	45857.9
Côte d'Ivoire	CIV	Lower middle income	Official multilateral	African Dev. Bank	2017	205689
Côte d'Ivoire	CIV	Lower middle income	Official multilateral	African Dev. Bank	2018	290592
Côte d'Ivoire	CIV	Lower middle income	Official multilateral	African Dev. Bank	2019	436463
Côte d'Ivoire	CIV	Lower middle income	Official multilateral	Asian Dev. Bank	2014	0
Côte d'Ivoire	CIV	Lower middle income	Official multilateral	Asian Dev. Bank	2015	0
Côte d'Ivoire	CIV	Lower middle income	Official multilateral	Asian Dev. Bank	2016	0
Côte d'Ivoire	CIV	Lower middle income	Official multilateral	Asian Dev. Bank	2017	0
Côte d'Ivoire	CIV	Lower middle income	Official multilateral	Asian Dev. Bank	2018	0
Côte d'Ivoire	CIV	Lower middle income	Official multilateral	Asian Dev. Bank	2019	0
Côte d'Ivoire	CIV	Lower middle income	Official multilateral	Inter-American Dev. Bank	2014	0
Côte d'Ivoire	CIV	Lower middle income	Official multilateral	Inter-American Dev. Bank	2015	0
Côte d'Ivoire	CIV	Lower middle income	Official multilateral	Inter-American Dev. Bank	2016	0
Côte d'Ivoire	CIV	Lower middle income	Official multilateral	Inter-American Dev. Bank	2017	0
Côte d'Ivoire	CIV	Lower middle income	Official multilateral	Inter-American Dev. Bank	2018	0
Côte d'Ivoire	CIV	Lower middle income	Official multilateral	Inter-American Dev. Bank	2019	0
Côte d'Ivoire	CIV	Lower middle income	Official multilateral	International Monetary Fund	2014	1.49216e+06
Côte d'Ivoire	CIV	Lower middle income	Official multilateral	International Monetary Fund	2015	1.50831e+06
Côte d'Ivoire	CIV	Lower middle income	Official multilateral	International Monetary Fund	2016	1.49485e+06
Côte d'Ivoire	CIV	Lower middle income	Official multilateral	International Monetary Fund	2017	1.73792e+06
Côte d'Ivoire	CIV	Lower middle income	Official multilateral	International Monetary Fund	2018	1.81403e+06
Côte d'Ivoire	CIV	Lower middle income	Official multilateral	International Monetary Fund	2019	1914818
Côte d'Ivoire	CIV	Lower middle income	Official multilateral	World Bank-IBRD	2014	0
Côte d'Ivoire	CIV	Lower middle income	Official multilateral	World Bank-IBRD	2015	0
Côte d'Ivoire	CIV	Lower middle income	Official multilateral	World Bank-IBRD	2016	0
Côte d'Ivoire	CIV	Lower middle income	Official multilateral	World Bank-IBRD	2017	0
Côte d'Ivoire	CIV	Lower middle income	Official multilateral	World Bank-IBRD	2018	17273
Côte d'Ivoire	CIV	Lower middle income	Official multilateral	World Bank-IBRD	2019	29900
Côte d'Ivoire	CIV	Lower middle income	Official multilateral	World Bank-IDA	2014	239934
Côte d'Ivoire	CIV	Lower middle income	Official multilateral	World Bank-IDA	2015	394318
Côte d'Ivoire	CIV	Lower middle income	Official multilateral	World Bank-IDA	2016	521828
Côte d'Ivoire	CIV	Lower middle income	Official multilateral	World Bank-IDA	2017	780587
Côte d'Ivoire	CIV	Lower middle income	Official multilateral	World Bank-IDA	2018	865360
Côte d'Ivoire	CIV	Lower middle income	Official multilateral	World Bank-IDA	2019	1174245
Côte d'Ivoire	CIV	Lower middle income	Official multilateral	Other multilateral	2014	465257
Côte d'Ivoire	CIV	Lower middle income	Official multilateral	Other multilateral	2015	451394
Côte d'Ivoire	CIV	Lower middle income	Official multilateral	Other multilateral	2016	450506
Côte d'Ivoire	CIV	Lower middle income	Official multilateral	Other multilateral	2017	595683
Côte d'Ivoire	CIV	Lower middle income	Official multilateral	Other multilateral	2018	837464
Côte d'Ivoire	CIV	Lower middle income	Official multilateral	Other multilateral	2019	951768
Côte d'Ivoire	CIV	Lower middle income	Official bilateral	China	2014	511087
Côte d'Ivoire	CIV	Lower middle income	Official bilateral	China	2015	745415
Côte d'Ivoire	CIV	Lower middle income	Official bilateral	China	2016	1.16109e+06
Côte d'Ivoire	CIV	Lower middle income	Official bilateral	China	2017	1.66336e+06
Côte d'Ivoire	CIV	Lower middle income	Official bilateral	China	2018	1.94376e+06
Côte d'Ivoire	CIV	Lower middle income	Official bilateral	China	2019	2396523
Côte d'Ivoire	CIV	Lower middle income	Official bilateral	France	2014	1953476
Côte d'Ivoire	CIV	Lower middle income	Official bilateral	France	2015	2506267
Côte d'Ivoire	CIV	Lower middle income	Official bilateral	France	2016	1.71328e+06
Côte d'Ivoire	CIV	Lower middle income	Official bilateral	France	2017	1.40892e+06
Côte d'Ivoire	CIV	Lower middle income	Official bilateral	France	2018	882237
Côte d'Ivoire	CIV	Lower middle income	Official bilateral	France	2019	684084
Côte d'Ivoire	CIV	Lower middle income	Official bilateral	Germany	2014	20456.4
Côte d'Ivoire	CIV	Lower middle income	Official bilateral	Germany	2015	9409.63
Côte d'Ivoire	CIV	Lower middle income	Official bilateral	Germany	2016	3096.95
Côte d'Ivoire	CIV	Lower middle income	Official bilateral	Germany	2017	1060.18
Côte d'Ivoire	CIV	Lower middle income	Official bilateral	Germany	2018	601.13
Côte d'Ivoire	CIV	Lower middle income	Official bilateral	Germany	2019	590
Côte d'Ivoire	CIV	Lower middle income	Official bilateral	India	2014	46202
Côte d'Ivoire	CIV	Lower middle income	Official bilateral	India	2015	52088
Côte d'Ivoire	CIV	Lower middle income	Official bilateral	India	2016	67702
Côte d'Ivoire	CIV	Lower middle income	Official bilateral	India	2017	219063
Côte d'Ivoire	CIV	Lower middle income	Official bilateral	India	2018	236197
Côte d'Ivoire	CIV	Lower middle income	Official bilateral	India	2019	229195
Côte d'Ivoire	CIV	Lower middle income	Official bilateral	Kuwait	2014	16321.7
Côte d'Ivoire	CIV	Lower middle income	Official bilateral	Kuwait	2015	14985.2
Côte d'Ivoire	CIV	Lower middle income	Official bilateral	Kuwait	2016	16870.8
Côte d'Ivoire	CIV	Lower middle income	Official bilateral	Kuwait	2017	17976.2
Côte d'Ivoire	CIV	Lower middle income	Official bilateral	Kuwait	2018	24849.3
Côte d'Ivoire	CIV	Lower middle income	Official bilateral	Kuwait	2019	31625
Côte d'Ivoire	CIV	Lower middle income	Official bilateral	Saudi Arabia	2014	12019.7
Côte d'Ivoire	CIV	Lower middle income	Official bilateral	Saudi Arabia	2015	10819.7
Côte d'Ivoire	CIV	Lower middle income	Official bilateral	Saudi Arabia	2016	13788.8
Côte d'Ivoire	CIV	Lower middle income	Official bilateral	Saudi Arabia	2017	15667.2
Côte d'Ivoire	CIV	Lower middle income	Official bilateral	Saudi Arabia	2018	21286.9
Côte d'Ivoire	CIV	Lower middle income	Official bilateral	Saudi Arabia	2019	20765
Côte d'Ivoire	CIV	Lower middle income	Official bilateral	Spain	2014	70642.1
Côte d'Ivoire	CIV	Lower middle income	Official bilateral	Spain	2015	56684.1
Côte d'Ivoire	CIV	Lower middle income	Official bilateral	Spain	2016	44508.4
Côte d'Ivoire	CIV	Lower middle income	Official bilateral	Spain	2017	41985.2
Côte d'Ivoire	CIV	Lower middle income	Official bilateral	Spain	2018	36036.6
Côte d'Ivoire	CIV	Lower middle income	Official bilateral	Spain	2019	25831
Côte d'Ivoire	CIV	Lower middle income	Official bilateral	United States	2014	3007
Côte d'Ivoire	CIV	Lower middle income	Official bilateral	United States	2015	2822
Côte d'Ivoire	CIV	Lower middle income	Official bilateral	United States	2016	2637
Côte d'Ivoire	CIV	Lower middle income	Official bilateral	United States	2017	2453
Côte d'Ivoire	CIV	Lower middle income	Official bilateral	United States	2018	2268
Côte d'Ivoire	CIV	Lower middle income	Official bilateral	United States	2019	2084
Côte d'Ivoire	CIV	Lower middle income	Official bilateral	Other bilateral	2014	92544.2
Côte d'Ivoire	CIV	Lower middle income	Official bilateral	Other bilateral	2015	82985.6
Côte d'Ivoire	CIV	Lower middle income	Official bilateral	Other bilateral	2016	64278.6
Côte d'Ivoire	CIV	Lower middle income	Official bilateral	Other bilateral	2017	54849.6
Côte d'Ivoire	CIV	Lower middle income	Official bilateral	Other bilateral	2018	34910.8
Côte d'Ivoire	CIV	Lower middle income	Official bilateral	Other bilateral	2019	17943
Côte d'Ivoire	CIV	Lower middle income	Non-official	China	2014	58500
Côte d'Ivoire	CIV	Lower middle income	Non-official	China	2015	51000
Côte d'Ivoire	CIV	Lower middle income	Non-official	China	2016	42500
Côte d'Ivoire	CIV	Lower middle income	Non-official	China	2017	34000
Côte d'Ivoire	CIV	Lower middle income	Non-official	China	2018	25500
Côte d'Ivoire	CIV	Lower middle income	Non-official	China	2019	150061
Côte d'Ivoire	CIV	Lower middle income	Non-official	Czech Republic	2014	0
Côte d'Ivoire	CIV	Lower middle income	Non-official	Czech Republic	2015	0
Côte d'Ivoire	CIV	Lower middle income	Non-official	Czech Republic	2016	0
Côte d'Ivoire	CIV	Lower middle income	Non-official	Czech Republic	2017	0
Côte d'Ivoire	CIV	Lower middle income	Non-official	Czech Republic	2018	18140.2
Côte d'Ivoire	CIV	Lower middle income	Non-official	Czech Republic	2019	100623
Côte d'Ivoire	CIV	Lower middle income	Non-official	France	2014	1034.41
Côte d'Ivoire	CIV	Lower middle income	Non-official	France	2015	0
Côte d'Ivoire	CIV	Lower middle income	Non-official	France	2016	0
Côte d'Ivoire	CIV	Lower middle income	Non-official	France	2017	6009.69
Côte d'Ivoire	CIV	Lower middle income	Non-official	France	2018	78660.4
Côte d'Ivoire	CIV	Lower middle income	Non-official	France	2019	571028
Côte d'Ivoire	CIV	Lower middle income	Non-official	United Kingdom	2014	0
Côte d'Ivoire	CIV	Lower middle income	Non-official	United Kingdom	2015	0
Côte d'Ivoire	CIV	Lower middle income	Non-official	United Kingdom	2016	0
Côte d'Ivoire	CIV	Lower middle income	Non-official	United Kingdom	2017	0
Côte d'Ivoire	CIV	Lower middle income	Non-official	United Kingdom	2018	150911
Côte d'Ivoire	CIV	Lower middle income	Non-official	United Kingdom	2019	258382
Côte d'Ivoire	CIV	Lower middle income	Bondholders	Bond market	2014	3.08493e+06
Côte d'Ivoire	CIV	Lower middle income	Bondholders	Bond market	2015	4.08464e+06
Côte d'Ivoire	CIV	Lower middle income	Bondholders	Bond market	2016	4.22094e+06
Côte d'Ivoire	CIV	Lower middle income	Bondholders	Bond market	2017	5.39779e+06
Côte d'Ivoire	CIV	Lower middle income	Bondholders	Bond market	2018	7230006
Côte d'Ivoire	CIV	Lower middle income	Bondholders	Bond market	2019	396257
Djibouti	DJI	Lower middle income	Total Official multilateral		2014	482293
Djibouti	DJI	Lower middle income	Total Official multilateral		2015	503434
Djibouti	DJI	Lower middle income	Total Official multilateral		2016	536129
Djibouti	DJI	Lower middle income	Total Official multilateral		2017	576787
Djibouti	DJI	Lower middle income	Total Official multilateral		2018	605310
Djibouti	DJI	Lower middle income	Total Official multilateral		2019	665377
Djibouti	DJI	Lower middle income	Total Official bilateral		2014	372674
Djibouti	DJI	Lower middle income	Total Official bilateral		2015	712012
Djibouti	DJI	Lower middle income	Total Official bilateral		2016	1.10508e+06
Djibouti	DJI	Lower middle income	Total Official bilateral		2017	1.40527e+06
Djibouti	DJI	Lower middle income	Total Official bilateral		2018	1.46843e+06
Djibouti	DJI	Lower middle income	Total Official bilateral		2019	1508008
Djibouti	DJI	Lower middle income	Total Non-official		2014	4054
Djibouti	DJI	Lower middle income	Total Non-official		2015	4032
Djibouti	DJI	Lower middle income	Total Non-official		2016	4009
Djibouti	DJI	Lower middle income	Total Non-official		2017	4009
Djibouti	DJI	Lower middle income	Total Non-official		2018	3872
Djibouti	DJI	Lower middle income	Total Non-official		2019	3599
Djibouti	DJI	Lower middle income	Total Bondholders		2014	0
Djibouti	DJI	Lower middle income	Total Bondholders		2015	0
Djibouti	DJI	Lower middle income	Total Bondholders		2016	0
Djibouti	DJI	Lower middle income	Total Bondholders		2017	0
Djibouti	DJI	Lower middle income	Total Bondholders		2018	0
Djibouti	DJI	Lower middle income	Total Bondholders		2019	0
Djibouti	DJI	Lower middle income	Total		2014	859021
Djibouti	DJI	Lower middle income	Total		2015	1.21948e+06
Djibouti	DJI	Lower middle income	Total		2016	1.64522e+06
Djibouti	DJI	Lower middle income	Total		2017	1.98606e+06
Djibouti	DJI	Lower middle income	Total		2018	2.07762e+06
Djibouti	DJI	Lower middle income	Total		2019	2145346
Djibouti	DJI	Lower middle income	Official multilateral	African Dev. Bank	2014	110691
Djibouti	DJI	Lower middle income	Official multilateral	African Dev. Bank	2015	103982
Djibouti	DJI	Lower middle income	Official multilateral	African Dev. Bank	2016	101377
Djibouti	DJI	Lower middle income	Official multilateral	African Dev. Bank	2017	103247
Djibouti	DJI	Lower middle income	Official multilateral	African Dev. Bank	2018	99961.8
Djibouti	DJI	Lower middle income	Official multilateral	African Dev. Bank	2019	112928
Djibouti	DJI	Lower middle income	Official multilateral	Asian Dev. Bank	2014	0
Djibouti	DJI	Lower middle income	Official multilateral	Asian Dev. Bank	2015	0
Djibouti	DJI	Lower middle income	Official multilateral	Asian Dev. Bank	2016	0
Djibouti	DJI	Lower middle income	Official multilateral	Asian Dev. Bank	2017	0
Djibouti	DJI	Lower middle income	Official multilateral	Asian Dev. Bank	2018	0
Djibouti	DJI	Lower middle income	Official multilateral	Asian Dev. Bank	2019	0
Djibouti	DJI	Lower middle income	Official multilateral	Inter-American Dev. Bank	2014	0
Djibouti	DJI	Lower middle income	Official multilateral	Inter-American Dev. Bank	2015	0
Djibouti	DJI	Lower middle income	Official multilateral	Inter-American Dev. Bank	2016	0
Djibouti	DJI	Lower middle income	Official multilateral	Inter-American Dev. Bank	2017	0
Djibouti	DJI	Lower middle income	Official multilateral	Inter-American Dev. Bank	2018	0
Djibouti	DJI	Lower middle income	Official multilateral	Inter-American Dev. Bank	2019	0
Djibouti	DJI	Lower middle income	Official multilateral	International Monetary Fund	2014	52878.7
Djibouti	DJI	Lower middle income	Official multilateral	International Monetary Fund	2015	49096.4
Djibouti	DJI	Lower middle income	Official multilateral	International Monetary Fund	2016	45796
Djibouti	DJI	Lower middle income	Official multilateral	International Monetary Fund	2017	43954.5
Djibouti	DJI	Lower middle income	Official multilateral	International Monetary Fund	2018	36733.6
Djibouti	DJI	Lower middle income	Official multilateral	International Monetary Fund	2019	31639
Djibouti	DJI	Lower middle income	Official multilateral	World Bank-IBRD	2014	0
Djibouti	DJI	Lower middle income	Official multilateral	World Bank-IBRD	2015	0
Djibouti	DJI	Lower middle income	Official multilateral	World Bank-IBRD	2016	0
Djibouti	DJI	Lower middle income	Official multilateral	World Bank-IBRD	2017	0
Djibouti	DJI	Lower middle income	Official multilateral	World Bank-IBRD	2018	0
Djibouti	DJI	Lower middle income	Official multilateral	World Bank-IBRD	2019	0
Djibouti	DJI	Lower middle income	Official multilateral	World Bank-IDA	2014	136579
Djibouti	DJI	Lower middle income	Official multilateral	World Bank-IDA	2015	129902
Djibouti	DJI	Lower middle income	Official multilateral	World Bank-IDA	2016	127926
Djibouti	DJI	Lower middle income	Official multilateral	World Bank-IDA	2017	143620
Djibouti	DJI	Lower middle income	Official multilateral	World Bank-IDA	2018	152157
Djibouti	DJI	Lower middle income	Official multilateral	World Bank-IDA	2019	161260
Djibouti	DJI	Lower middle income	Official multilateral	Other multilateral	2014	182144
Djibouti	DJI	Lower middle income	Official multilateral	Other multilateral	2015	220453
Djibouti	DJI	Lower middle income	Official multilateral	Other multilateral	2016	261030
Djibouti	DJI	Lower middle income	Official multilateral	Other multilateral	2017	285966
Djibouti	DJI	Lower middle income	Official multilateral	Other multilateral	2018	316457
Djibouti	DJI	Lower middle income	Official multilateral	Other multilateral	2019	359550
Djibouti	DJI	Lower middle income	Official bilateral	Belgium	2014	111.7
Djibouti	DJI	Lower middle income	Official bilateral	Belgium	2015	100.16
Djibouti	DJI	Lower middle income	Official bilateral	Belgium	2016	96.98
Djibouti	DJI	Lower middle income	Official bilateral	Belgium	2017	110.34
Djibouti	DJI	Lower middle income	Official bilateral	Belgium	2018	105.34
Djibouti	DJI	Lower middle income	Official bilateral	Belgium	2019	103
Djibouti	DJI	Lower middle income	Official bilateral	China	2014	178691
Djibouti	DJI	Lower middle income	Official bilateral	China	2015	517951
Djibouti	DJI	Lower middle income	Official bilateral	China	2016	887496
Djibouti	DJI	Lower middle income	Official bilateral	China	2017	1.16053e+06
Djibouti	DJI	Lower middle income	Official bilateral	China	2018	1.1865e+06
Djibouti	DJI	Lower middle income	Official bilateral	China	2019	1195470
Djibouti	DJI	Lower middle income	Official bilateral	France	2014	4781.13
Djibouti	DJI	Lower middle income	Official bilateral	France	2015	3985.73
Djibouti	DJI	Lower middle income	Official bilateral	France	2016	3664.05
Djibouti	DJI	Lower middle income	Official bilateral	France	2017	4168.77
Djibouti	DJI	Lower middle income	Official bilateral	France	2018	3717.82
Djibouti	DJI	Lower middle income	Official bilateral	France	2019	3135
Djibouti	DJI	Lower middle income	Official bilateral	India	2014	25353
Djibouti	DJI	Lower middle income	Official bilateral	India	2015	27361
Djibouti	DJI	Lower middle income	Official bilateral	India	2016	29769
Djibouti	DJI	Lower middle income	Official bilateral	India	2017	34887
Djibouti	DJI	Lower middle income	Official bilateral	India	2018	38109
Djibouti	DJI	Lower middle income	Official bilateral	India	2019	38527
Djibouti	DJI	Lower middle income	Official bilateral	Italy	2014	48269
Djibouti	DJI	Lower middle income	Official bilateral	Italy	2015	43283.4
Djibouti	DJI	Lower middle income	Official bilateral	Italy	2016	41907.9
Djibouti	DJI	Lower middle income	Official bilateral	Italy	2017	47680.6
Djibouti	DJI	Lower middle income	Official bilateral	Italy	2018	45521.8
Djibouti	DJI	Lower middle income	Official bilateral	Italy	2019	9953
Djibouti	DJI	Lower middle income	Official bilateral	Kuwait	2014	69289.6
Djibouti	DJI	Lower middle income	Official bilateral	Kuwait	2015	73324.7
Djibouti	DJI	Lower middle income	Official bilateral	Kuwait	2016	100872
Djibouti	DJI	Lower middle income	Official bilateral	Kuwait	2017	115489
Djibouti	DJI	Lower middle income	Official bilateral	Kuwait	2018	132667
Djibouti	DJI	Lower middle income	Official bilateral	Kuwait	2019	44663
Djibouti	DJI	Lower middle income	Official bilateral	Saudi Arabia	2014	22470.4
Djibouti	DJI	Lower middle income	Official bilateral	Saudi Arabia	2015	23720.3
Djibouti	DJI	Lower middle income	Official bilateral	Saudi Arabia	2016	19457.1
Djibouti	DJI	Lower middle income	Official bilateral	Saudi Arabia	2017	19299.7
Djibouti	DJI	Lower middle income	Official bilateral	Saudi Arabia	2018	29150.7
Djibouti	DJI	Lower middle income	Official bilateral	Saudi Arabia	2019	163927
Djibouti	DJI	Lower middle income	Official bilateral	Spain	2014	739
Djibouti	DJI	Lower middle income	Official bilateral	Spain	2015	736
Djibouti	DJI	Lower middle income	Official bilateral	Spain	2016	733
Djibouti	DJI	Lower middle income	Official bilateral	Spain	2017	733
Djibouti	DJI	Lower middle income	Official bilateral	Spain	2018	733
Djibouti	DJI	Lower middle income	Official bilateral	Spain	2019	32220
Djibouti	DJI	Lower middle income	Official bilateral	Turkey	2014	0
Djibouti	DJI	Lower middle income	Official bilateral	Turkey	2015	0
Djibouti	DJI	Lower middle income	Official bilateral	Turkey	2016	0
Djibouti	DJI	Lower middle income	Official bilateral	Turkey	2017	0
Djibouti	DJI	Lower middle income	Official bilateral	Turkey	2018	10037
Djibouti	DJI	Lower middle income	Official bilateral	Turkey	2019	733
Djibouti	DJI	Lower middle income	Official bilateral	United Arab Emirates	2014	12212.9
Djibouti	DJI	Lower middle income	Official bilateral	United Arab Emirates	2015	11903.6
Djibouti	DJI	Lower middle income	Official bilateral	United Arab Emirates	2016	11748.7
Djibouti	DJI	Lower middle income	Official bilateral	United Arab Emirates	2017	11748.7
Djibouti	DJI	Lower middle income	Official bilateral	United Arab Emirates	2018	11748.7
Djibouti	DJI	Lower middle income	Official bilateral	United Arab Emirates	2019	7528
Djibouti	DJI	Lower middle income	Official bilateral	Other bilateral	2014	10756.9
Djibouti	DJI	Lower middle income	Official bilateral	Other bilateral	2015	9645.88
Djibouti	DJI	Lower middle income	Official bilateral	Other bilateral	2016	9339.33
Djibouti	DJI	Lower middle income	Official bilateral	Other bilateral	2017	10625.8
Djibouti	DJI	Lower middle income	Official bilateral	Other bilateral	2018	10144.7
Djibouti	DJI	Lower middle income	Official bilateral	Other bilateral	2019	11749
Djibouti	DJI	Lower middle income	Non-official	Spain	2014	4054
Djibouti	DJI	Lower middle income	Non-official	Spain	2015	4032
Djibouti	DJI	Lower middle income	Non-official	Spain	2016	4009
Djibouti	DJI	Lower middle income	Non-official	Spain	2017	4009
Djibouti	DJI	Lower middle income	Non-official	Spain	2018	3872
Djibouti	DJI	Lower middle income	Non-official	Spain	2019	3599
Dominica	DMA	Upper middle income	Total Official multilateral		2014	149558
Dominica	DMA	Upper middle income	Total Official multilateral		2015	159079
Dominica	DMA	Upper middle income	Total Official multilateral		2016	151353
Dominica	DMA	Upper middle income	Total Official multilateral		2017	153165
Dominica	DMA	Upper middle income	Total Official multilateral		2018	146247
Dominica	DMA	Upper middle income	Total Official multilateral		2019	142837
Dominica	DMA	Upper middle income	Total Official bilateral		2014	93555
Dominica	DMA	Upper middle income	Total Official bilateral		2015	92027.1
Dominica	DMA	Upper middle income	Total Official bilateral		2016	81489.6
Dominica	DMA	Upper middle income	Total Official bilateral		2017	78386.2
Dominica	DMA	Upper middle income	Total Official bilateral		2018	68625.6
Dominica	DMA	Upper middle income	Total Official bilateral		2019	60665
Dominica	DMA	Upper middle income	Total Non-official		2014	33871
Dominica	DMA	Upper middle income	Total Non-official		2015	31864.8
Dominica	DMA	Upper middle income	Total Non-official		2016	29856.6
Dominica	DMA	Upper middle income	Total Non-official		2017	27677.7
Dominica	DMA	Upper middle income	Total Non-official		2018	25628.4
Dominica	DMA	Upper middle income	Total Non-official		2019	22962
Dominica	DMA	Upper middle income	Total Bondholders		2014	25743.2
Dominica	DMA	Upper middle income	Total Bondholders		2015	25661.7
Dominica	DMA	Upper middle income	Total Bondholders		2016	25590.2
Dominica	DMA	Upper middle income	Total Bondholders		2017	25518.7
Dominica	DMA	Upper middle income	Total Bondholders		2018	25518.7
Dominica	DMA	Upper middle income	Total Bondholders		2019	44961
Dominica	DMA	Upper middle income	Total		2014	302728
Dominica	DMA	Upper middle income	Total		2015	308633
Dominica	DMA	Upper middle income	Total		2016	288290
Dominica	DMA	Upper middle income	Total		2017	284748
Dominica	DMA	Upper middle income	Total		2018	266020
Dominica	DMA	Upper middle income	Total		2019	250664
Dominica	DMA	Upper middle income	Official multilateral	African Dev. Bank	2014	0
Dominica	DMA	Upper middle income	Official multilateral	African Dev. Bank	2015	0
Dominica	DMA	Upper middle income	Official multilateral	African Dev. Bank	2016	0
Dominica	DMA	Upper middle income	Official multilateral	African Dev. Bank	2017	0
Dominica	DMA	Upper middle income	Official multilateral	African Dev. Bank	2018	0
Dominica	DMA	Upper middle income	Official multilateral	African Dev. Bank	2019	0
Dominica	DMA	Upper middle income	Official multilateral	Asian Dev. Bank	2014	0
Dominica	DMA	Upper middle income	Official multilateral	Asian Dev. Bank	2015	0
Dominica	DMA	Upper middle income	Official multilateral	Asian Dev. Bank	2016	0
Dominica	DMA	Upper middle income	Official multilateral	Asian Dev. Bank	2017	0
Dominica	DMA	Upper middle income	Official multilateral	Asian Dev. Bank	2018	0
Dominica	DMA	Upper middle income	Official multilateral	Asian Dev. Bank	2019	0
Dominica	DMA	Upper middle income	Official multilateral	Inter-American Dev. Bank	2014	0
Dominica	DMA	Upper middle income	Official multilateral	Inter-American Dev. Bank	2015	0
Dominica	DMA	Upper middle income	Official multilateral	Inter-American Dev. Bank	2016	0
Dominica	DMA	Upper middle income	Official multilateral	Inter-American Dev. Bank	2017	0
Dominica	DMA	Upper middle income	Official multilateral	Inter-American Dev. Bank	2018	0
Dominica	DMA	Upper middle income	Official multilateral	Inter-American Dev. Bank	2019	0
Dominica	DMA	Upper middle income	Official multilateral	International Monetary Fund	2014	20938.2
Dominica	DMA	Upper middle income	Official multilateral	International Monetary Fund	2015	26503.5
Dominica	DMA	Upper middle income	Official multilateral	International Monetary Fund	2016	24206
Dominica	DMA	Upper middle income	Official multilateral	International Monetary Fund	2017	24416.8
Dominica	DMA	Upper middle income	Official multilateral	International Monetary Fund	2018	22362.5
Dominica	DMA	Upper middle income	Official multilateral	International Monetary Fund	2019	20760
Dominica	DMA	Upper middle income	Official multilateral	World Bank-IBRD	2014	92
Dominica	DMA	Upper middle income	Official multilateral	World Bank-IBRD	2015	31
Dominica	DMA	Upper middle income	Official multilateral	World Bank-IBRD	2016	0
Dominica	DMA	Upper middle income	Official multilateral	World Bank-IBRD	2017	0
Dominica	DMA	Upper middle income	Official multilateral	World Bank-IBRD	2018	0
Dominica	DMA	Upper middle income	Official multilateral	World Bank-IBRD	2019	0
Dominica	DMA	Upper middle income	Official multilateral	World Bank-IDA	2014	26263
Dominica	DMA	Upper middle income	Official multilateral	World Bank-IDA	2015	25485
Dominica	DMA	Upper middle income	Official multilateral	World Bank-IDA	2016	24021
Dominica	DMA	Upper middle income	Official multilateral	World Bank-IDA	2017	32802
Dominica	DMA	Upper middle income	Official multilateral	World Bank-IDA	2018	34045
Dominica	DMA	Upper middle income	Official multilateral	World Bank-IDA	2019	35556
Dominica	DMA	Upper middle income	Official multilateral	Other multilateral	2014	102265
Dominica	DMA	Upper middle income	Official multilateral	Other multilateral	2015	107060
Dominica	DMA	Upper middle income	Official multilateral	Other multilateral	2016	103126
Dominica	DMA	Upper middle income	Official multilateral	Other multilateral	2017	95946.2
Dominica	DMA	Upper middle income	Official multilateral	Other multilateral	2018	89839.3
Dominica	DMA	Upper middle income	Official multilateral	Other multilateral	2019	86520
Dominica	DMA	Upper middle income	Official bilateral	China	2014	43914.4
Dominica	DMA	Upper middle income	Official bilateral	China	2015	46830.3
Dominica	DMA	Upper middle income	Official bilateral	China	2016	40550.6
Dominica	DMA	Upper middle income	Official bilateral	China	2017	39598.7
Dominica	DMA	Upper middle income	Official bilateral	China	2018	34459.7
Dominica	DMA	Upper middle income	Official bilateral	China	2019	29456
Dominica	DMA	Upper middle income	Official bilateral	France	2014	34155.5
Dominica	DMA	Upper middle income	Official bilateral	France	2015	31163.3
Dominica	DMA	Upper middle income	Official bilateral	France	2016	27995.4
Dominica	DMA	Upper middle income	Official bilateral	France	2017	26758.9
Dominica	DMA	Upper middle income	Official bilateral	France	2018	22457.9
Dominica	DMA	Upper middle income	Official bilateral	France	2019	18661
Dominica	DMA	Upper middle income	Official bilateral	Kuwait	2014	3709.02
Dominica	DMA	Upper middle income	Official bilateral	Kuwait	2015	3011.54
Dominica	DMA	Upper middle income	Official bilateral	Kuwait	2016	2423.65
Dominica	DMA	Upper middle income	Official bilateral	Kuwait	2017	2010.6
Dominica	DMA	Upper middle income	Official bilateral	Kuwait	2018	1690
Dominica	DMA	Upper middle income	Official bilateral	Kuwait	2019	1383
Dominica	DMA	Upper middle income	Official bilateral	Venezuela, RB	2014	5776
Dominica	DMA	Upper middle income	Official bilateral	Venezuela, RB	2015	5022
Dominica	DMA	Upper middle income	Official bilateral	Venezuela, RB	2016	4520
Dominica	DMA	Upper middle income	Official bilateral	Venezuela, RB	2017	4018
Dominica	DMA	Upper middle income	Official bilateral	Venezuela, RB	2018	4018
Dominica	DMA	Upper middle income	Official bilateral	Venezuela, RB	2019	4018
Dominica	DMA	Upper middle income	Official bilateral	Other bilateral	2014	6000
Dominica	DMA	Upper middle income	Official bilateral	Other bilateral	2015	6000
Dominica	DMA	Upper middle income	Official bilateral	Other bilateral	2016	6000
Dominica	DMA	Upper middle income	Official bilateral	Other bilateral	2017	6000
Dominica	DMA	Upper middle income	Official bilateral	Other bilateral	2018	6000
Dominica	DMA	Upper middle income	Official bilateral	Other bilateral	2019	6000
Dominica	DMA	Upper middle income	Non-official	Barbados	2014	905.93
Dominica	DMA	Upper middle income	Non-official	Barbados	2015	846.67
Dominica	DMA	Upper middle income	Non-official	Barbados	2016	787.41
Dominica	DMA	Upper middle income	Non-official	Barbados	2017	728.15
Dominica	DMA	Upper middle income	Non-official	Barbados	2018	728.15
Dominica	DMA	Upper middle income	Non-official	Barbados	2019	728
Dominica	DMA	Upper middle income	Non-official	Grenada	2014	885.19
Dominica	DMA	Upper middle income	Non-official	Grenada	2015	781.11
Dominica	DMA	Upper middle income	Non-official	Grenada	2016	677.04
Dominica	DMA	Upper middle income	Non-official	Grenada	2017	572.96
Dominica	DMA	Upper middle income	Non-official	Grenada	2018	491.11
Dominica	DMA	Upper middle income	Non-official	Grenada	2019	409
Dominica	DMA	Upper middle income	Non-official	Montserrat	2014	221.48
Dominica	DMA	Upper middle income	Non-official	Montserrat	2015	195.19
Dominica	DMA	Upper middle income	Non-official	Montserrat	2016	169.26
Dominica	DMA	Upper middle income	Non-official	Montserrat	2017	143.33
Dominica	DMA	Upper middle income	Non-official	Montserrat	2018	122.59
Dominica	DMA	Upper middle income	Non-official	Montserrat	2019	0
Dominica	DMA	Upper middle income	Non-official	St. Kitts And Nevis	2014	41.11
Dominica	DMA	Upper middle income	Non-official	St. Kitts And Nevis	2015	36.3
Dominica	DMA	Upper middle income	Non-official	St. Kitts And Nevis	2016	31.48
Dominica	DMA	Upper middle income	Non-official	St. Kitts And Nevis	2017	26.67
Dominica	DMA	Upper middle income	Non-official	St. Kitts And Nevis	2018	22.59
Dominica	DMA	Upper middle income	Non-official	St. Kitts And Nevis	2019	19
Dominica	DMA	Upper middle income	Non-official	St. Lucia	2014	642.22
Dominica	DMA	Upper middle income	Non-official	St. Lucia	2015	630.74
Dominica	DMA	Upper middle income	Non-official	St. Lucia	2016	619.26
Dominica	DMA	Upper middle income	Non-official	St. Lucia	2017	614.44
Dominica	DMA	Upper middle income	Non-official	St. Lucia	2018	604.44
Dominica	DMA	Upper middle income	Non-official	St. Lucia	2019	574
Dominica	DMA	Upper middle income	Non-official	St. Vincent and The Grenadines	2014	3873.33
Dominica	DMA	Upper middle income	Non-official	St. Vincent and The Grenadines	2015	3417.78
Dominica	DMA	Upper middle income	Non-official	St. Vincent and The Grenadines	2016	2961.85
Dominica	DMA	Upper middle income	Non-official	St. Vincent and The Grenadines	2017	2505.93
Dominica	DMA	Upper middle income	Non-official	St. Vincent and The Grenadines	2018	2147.41
Dominica	DMA	Upper middle income	Non-official	St. Vincent and The Grenadines	2019	1789
Dominica	DMA	Upper middle income	Non-official	Trinidad and Tobago	2014	13915.6
Dominica	DMA	Upper middle income	Non-official	Trinidad and Tobago	2015	12690.7
Dominica	DMA	Upper middle income	Non-official	Trinidad and Tobago	2016	11464.1
Dominica	DMA	Upper middle income	Non-official	Trinidad and Tobago	2017	10240
Dominica	DMA	Upper middle income	Non-official	Trinidad and Tobago	2018	9265.93
Dominica	DMA	Upper middle income	Non-official	Trinidad and Tobago	2019	8294
Dominica	DMA	Upper middle income	Non-official	United Kingdom	2014	10304
[truncated: 5,897 more rows]

## Sheet: Public external debt
Debtor	Code	Region	Creditor Type	Creditor	Creditor-new	Debt Oustanding (thousand USD)	GDP in 2019 (thousand USD)	Debt-to-GDP ratio
Afghanistan	AFG	South Asia	Official bilateral	Iran, Islamic Republic Of	Iran, Islamic Republic Of (Official bilateral)	9139	1.92911e+07	0.000473742
Afghanistan	AFG	South Asia	Official bilateral	Italy	Italy (Official bilateral)	23928	1.92911e+07	0.00124036
Afghanistan	AFG	South Asia	Official bilateral	Kuwait	Kuwait (Official bilateral)	22722	1.92911e+07	0.00117785
Afghanistan	AFG	South Asia	Official bilateral	Other Bilateral	Other Bilateral (Official bilateral)	4701	1.92911e+07	0.000243687
Afghanistan	AFG	South Asia	Official bilateral	Russian Federation	Russian Federation (Official bilateral)	849119	1.92911e+07	0.0440161
Afghanistan	AFG	South Asia	Official bilateral	Saudi Arabia	Saudi Arabia (Official bilateral)	79377	1.92911e+07	0.00411469
Afghanistan	AFG	South Asia	Official multilateral	Asian Dev. Bank	Asian Dev. Bank (Official multilateral)	573753	1.92911e+07	0.0297418
Afghanistan	AFG	South Asia	Official multilateral	International Monetary Fund	International Monetary Fund (Official multilateral)	276923	1.92911e+07	0.014355
Afghanistan	AFG	South Asia	Official multilateral	Other Multilaterals	Other Multilaterals (Official multilateral)	42596	1.92911e+07	0.00220806
Afghanistan	AFG	South Asia	Official multilateral	World Bank-IDA	World Bank-IDA (Official multilateral)	338272	1.92911e+07	0.0175351
Afghanistan	AFG	South Asia	Total		(Total)	2220531	1.92911e+07	0.115106
Afghanistan	AFG	South Asia	Total Official bilateral		(Total Official bilateral)	988986	1.92911e+07	0.0512664
Afghanistan	AFG	South Asia	Total Official multilateral		(Total Official multilateral)	1231545	1.92911e+07	0.06384
Angola	AGO	Sub-Saharan Africa	Bondholders	Bond market	Bond market (Bondholders)	8000000	8.88157e+07	0.0900742
Angola	AGO	Sub-Saharan Africa	Non-official	Belgium	Belgium (Non-official)	37502	8.88157e+07	0.000422245
Angola	AGO	Sub-Saharan Africa	Non-official	Canada	Canada (Non-official)	121975	8.88157e+07	0.00137335
Angola	AGO	Sub-Saharan Africa	Non-official	China	China (Non-official)	676905	8.88157e+07	0.00762146
Angola	AGO	Sub-Saharan Africa	Non-official	France	France (Non-official)	135948	8.88157e+07	0.00153068
Angola	AGO	Sub-Saharan Africa	Non-official	Germany	Germany (Non-official)	69818	8.88157e+07	0.0007861
Angola	AGO	Sub-Saharan Africa	Non-official	Ireland	Ireland (Non-official)	206691	8.88157e+07	0.00232719
Angola	AGO	Sub-Saharan Africa	Non-official	Israel	Israel (Non-official)	500671	8.88157e+07	0.00563719
Angola	AGO	Sub-Saharan Africa	Non-official	Italy	Italy (Non-official)	75844	8.88157e+07	0.000853948
Angola	AGO	Sub-Saharan Africa	Non-official	Netherlands	Netherlands (Non-official)	351061	8.88157e+07	0.00395269
Angola	AGO	Sub-Saharan Africa	Non-official	Portugal	Portugal (Non-official)	322857	8.88157e+07	0.00363513
Angola	AGO	Sub-Saharan Africa	Non-official	Spain		698880	8.88157e+07	0.00786888
Angola	AGO	Sub-Saharan Africa	Non-official	United Kingdom	United Kingdom (Non-official)	3512042	8.88157e+07	0.039543
Angola	AGO	Sub-Saharan Africa	Non-official	United States	United States (Non-official)	462190	8.88157e+07	0.00520392
Angola	AGO	Sub-Saharan Africa	Official bilateral	Belgium	Belgium (Official bilateral)	66	8.88157e+07	7.43112e-07
Angola	AGO	Sub-Saharan Africa	Official bilateral	Canada	Canada (Official bilateral)	346146	8.88157e+07	0.00389735
Angola	AGO	Sub-Saharan Africa	Official bilateral	China	China (Official bilateral)	15047785	8.88157e+07	0.169427
Angola	AGO	Sub-Saharan Africa	Official bilateral	India	India (Official bilateral)	36402	8.88157e+07	0.00040986
Angola	AGO	Sub-Saharan Africa	Official bilateral	Italy	Italy (Official bilateral)	18862	8.88157e+07	0.000212372
Angola	AGO	Sub-Saharan Africa	Official bilateral	Japan	Japan (Official bilateral)	468515	8.88157e+07	0.00527514
Angola	AGO	Sub-Saharan Africa	Official bilateral	Netherlands	Netherlands (Official bilateral)	2982	8.88157e+07	3.35751e-05
Angola	AGO	Sub-Saharan Africa	Official bilateral	Other bilateral	Other bilateral (Official bilateral)	186226	8.88157e+07	0.00209677
Angola	AGO	Sub-Saharan Africa	Official bilateral	Portugal	Portugal (Official bilateral)	391014	8.88157e+07	0.00440253
Angola	AGO	Sub-Saharan Africa	Official bilateral	Spain	Spain (Official bilateral)	37595	8.88157e+07	0.000423292
Angola	AGO	Sub-Saharan Africa	Official bilateral	United States	United States (Official bilateral)	13130	8.88157e+07	0.000147834
Angola	AGO	Sub-Saharan Africa	Official multilateral	African Dev. Bank	African Dev. Bank (Official multilateral)	1196016	8.88157e+07	0.0134663
Angola	AGO	Sub-Saharan Africa	Official multilateral	International Monetary Fund	International Monetary Fund (Official multilateral)	1861296	8.88157e+07	0.0209568
Angola	AGO	Sub-Saharan Africa	Official multilateral	Other multilateral	Other multilateral (Official multilateral)	15438	8.88157e+07	0.000173821
Angola	AGO	Sub-Saharan Africa	Official multilateral	World Bank-IBRD	World Bank-IBRD (Official multilateral)	1109047	8.88157e+07	0.0124871
Angola	AGO	Sub-Saharan Africa	Official multilateral	World Bank-IDA	World Bank-IDA (Official multilateral)	526778	8.88157e+07	0.00593114
Angola	AGO	Sub-Saharan Africa	Total		(Total)	36429680	8.88157e+07	0.410172
Angola	AGO	Sub-Saharan Africa	Total Bondholders		(Total Bondholders)	8000000	8.88157e+07	0.0900742
Angola	AGO	Sub-Saharan Africa	Total Non-official		(Total Non-official)	7172384	8.88157e+07	0.0807558
Angola	AGO	Sub-Saharan Africa	Total Official bilateral		(Total Official bilateral)	16548722	8.88157e+07	0.186327
Angola	AGO	Sub-Saharan Africa	Total Official multilateral		(Total Official multilateral)	4708575	8.88157e+07	0.0530151
Bangladesh	BGD	South Asia	Non-official	Denmark	Denmark (Non-official)	18618	3.02571e+08	6.15326e-05
Bangladesh	BGD	South Asia	Official bilateral	Belarus		49999	3.02571e+08	0.000165247
Bangladesh	BGD	South Asia	Official bilateral	Belgium	Belgium (Official bilateral)	418	3.02571e+08	1.38149e-06
Bangladesh	BGD	South Asia	Official bilateral	China	China (Official bilateral)	3599643	3.02571e+08	0.0118968
Bangladesh	BGD	South Asia	Official bilateral	Denmark		22943	3.02571e+08	7.58268e-05
Bangladesh	BGD	South Asia	Official bilateral	France	France (Official bilateral)	147819	3.02571e+08	0.000488543
Bangladesh	BGD	South Asia	Official bilateral	Germany	Germany (Official bilateral)	22411	3.02571e+08	7.40685e-05
Bangladesh	BGD	South Asia	Official bilateral	India	India (Official bilateral)	530262	3.02571e+08	0.00175252
Bangladesh	BGD	South Asia	Official bilateral	Japan	Japan (Official bilateral)	6227868	3.02571e+08	0.0205831
Bangladesh	BGD	South Asia	Official bilateral	Kuwait	Kuwait (Official bilateral)	157495	3.02571e+08	0.000520522
Bangladesh	BGD	South Asia	Official bilateral	Russian Federation		2417328	3.02571e+08	0.00798929
Bangladesh	BGD	South Asia	Official bilateral	Other bilateral	Other bilateral (Official bilateral)	514976	3.02571e+08	0.001702
Bangladesh	BGD	South Asia	Official bilateral	Saudi Arabia	Saudi Arabia (Official bilateral)	119483	3.02571e+08	0.000394892
Bangladesh	BGD	South Asia	Official bilateral	Spain	Spain (Official bilateral)	1122	3.02571e+08	3.70822e-06
Bangladesh	BGD	South Asia	Official bilateral	Switzerland	Switzerland (Official bilateral)	78	3.02571e+08	2.57791e-07
Bangladesh	BGD	South Asia	Official bilateral	United Arab Emirates	United Arab Emirates (Official bilateral)	48035	3.02571e+08	0.000158756
Bangladesh	BGD	South Asia	Official bilateral	United States	United States (Official bilateral)	324	3.02571e+08	1.07082e-06
Bangladesh	BGD	South Asia	Official multilateral	Asian Dev. Bank	Asian Dev. Bank (Official multilateral)	9950834	3.02571e+08	0.0328876
Bangladesh	BGD	South Asia	Official multilateral	International Monetary Fund	International Monetary Fund (Official multilateral)	1413764	3.02571e+08	0.0046725
Bangladesh	BGD	South Asia	Official multilateral	Other multilateral	Other multilateral (Official multilateral)	1418620	3.02571e+08	0.00468855
Bangladesh	BGD	South Asia	Official multilateral	World Bank-IDA	World Bank-IDA (Official multilateral)	15788308	3.02571e+08	0.0521805
Bangladesh	BGD	South Asia	Total		(Total)	42450348	3.02571e+08	0.140299
Bangladesh	BGD	South Asia	Total Non-official		(Total Non-official)	18618	3.02571e+08	6.15326e-05
Bangladesh	BGD	South Asia	Total Official bilateral		(Total Official bilateral)	13860204	3.02571e+08	0.0458081
Bangladesh	BGD	South Asia	Total Official multilateral		(Total Official multilateral)	28571526	3.02571e+08	0.0944291
Benin	BEN	Sub-Saharan Africa	Non-official	United Kingdom	United Kingdom (Non-official)	292084	1.43907e+07	0.0202967
Benin	BEN	Sub-Saharan Africa	Non-official	Netherlands	Netherlands (Non-official)	125761	1.43907e+07	0.00873904
Benin	BEN	Sub-Saharan Africa	Non-official	Germany	Germany (Non-official)	89888	1.43907e+07	0.00624625
Benin	BEN	Sub-Saharan Africa	Official bilateral	China	China (Official bilateral)	302101	1.43907e+07	0.0209928
Benin	BEN	Sub-Saharan Africa	Official bilateral	Kuwait	Kuwait (Official bilateral)	46062	1.43907e+07	0.00320082
Benin	BEN	Sub-Saharan Africa	Official bilateral	Saudi Arabia	Saudi Arabia (Official bilateral)	38092	1.43907e+07	0.00264699
Benin	BEN	Sub-Saharan Africa	Official bilateral	India	India (Official bilateral)	23254	1.43907e+07	0.0016159
Benin	BEN	Sub-Saharan Africa	Official bilateral	France	France (Official bilateral)	21630	1.43907e+07	0.00150305
Benin	BEN	Sub-Saharan Africa	Official bilateral	Brazil	Brazil (Official bilateral)	4484	1.43907e+07	0.00031159
Benin	BEN	Sub-Saharan Africa	Official bilateral	United Arab Emirates	United Arab Emirates (Official bilateral)	3514	1.43907e+07	0.000244185
Benin	BEN	Sub-Saharan Africa	Official multilateral	World Bank-IDA	World Bank-IDA (Official multilateral)	1081787	1.43907e+07	0.0751726
Benin	BEN	Sub-Saharan Africa	Official multilateral	Other multilateral	Other multilateral (Official multilateral)	578665	1.43907e+07	0.040211
Benin	BEN	Sub-Saharan Africa	Official multilateral	African Dev. Bank	African Dev. Bank (Official multilateral)	447254	1.43907e+07	0.0310794
Benin	BEN	Sub-Saharan Africa	Official multilateral	International Monetary Fund	International Monetary Fund (Official multilateral)	266700	1.43907e+07	0.0185328
Benin	BEN	Sub-Saharan Africa	Bondholders	Bond market		556563	1.43907e+07	0.0386752
Benin	BEN	Sub-Saharan Africa	Total		(Total)	3877839	1.43907e+07	0.269468
Benin	BEN	Sub-Saharan Africa	Total Bondholders		(Total Bondholders)	556563	1.43907e+07	0.0386752
Benin	BEN	Sub-Saharan Africa	Total Non-official		(Total Non-official)	507733	1.43907e+07	0.035282
Benin	BEN	Sub-Saharan Africa	Total Official bilateral		(Total Official bilateral)	439136	1.43907e+07	0.0305152
Benin	BEN	Sub-Saharan Africa	Total Official multilateral		(Total Official multilateral)	2374407	1.43907e+07	0.164996
Bhutan	BTN	South Asia	Non-official	Austria	Austria (Non-official)	24262	2.53055e+06	0.00958765
Bhutan	BTN	South Asia	Official bilateral	India	India (Official bilateral)	1882902	2.53055e+06	0.744069
Bhutan	BTN	South Asia	Official bilateral	Japan	Japan (Official bilateral)	41780	2.53055e+06	0.0165103
Bhutan	BTN	South Asia	Official bilateral	Austria	Austria (Official bilateral)	21129	2.53055e+06	0.00834958
Bhutan	BTN	South Asia	Official multilateral	Asian Dev. Bank	Asian Dev. Bank (Official multilateral)	326197	2.53055e+06	0.128904
Bhutan	BTN	South Asia	Official multilateral	World Bank-IDA	World Bank-IDA (Official multilateral)	270948	2.53055e+06	0.107071
Bhutan	BTN	South Asia	Official multilateral	Other Multilaterals	Other Multilaterals (Official multilateral)	49075	2.53055e+06	0.019393
Bhutan	BTN	South Asia	Official multilateral	International Monetary Fund	International Monetary Fund (Official multilateral)	8282	2.53055e+06	0.00327281
Bhutan	BTN	South Asia	Total		(Total)	2624575	2.53055e+06	1.03716
Bhutan	BTN	South Asia	Total Non-official		(Total Non-official)	24262	2.53055e+06	0.00958765
Bhutan	BTN	South Asia	Total Official bilateral		(Total Official bilateral)	1945811	2.53055e+06	0.768929
Bhutan	BTN	South Asia	Total Official multilateral		(Total Official multilateral)	654502	2.53055e+06	0.258641
Burkina Faso	BFA	Sub-Saharan Africa	Official bilateral	France	France (Official bilateral)	88951	1.59908e+07	0.00556263
Burkina Faso	BFA	Sub-Saharan Africa	Official bilateral	Kuwait	Kuwait (Official bilateral)	59363	1.59908e+07	0.00371232
Burkina Faso	BFA	Sub-Saharan Africa	Official bilateral	China	China (Official bilateral)	57116	1.59908e+07	0.0035718
Burkina Faso	BFA	Sub-Saharan Africa	Official bilateral	Other Bilateral	Other Bilateral (Official bilateral)	50522	1.59908e+07	0.00315944
Burkina Faso	BFA	Sub-Saharan Africa	Official bilateral	Saudi Arabia	Saudi Arabia (Official bilateral)	43409	1.59908e+07	0.00271462
Burkina Faso	BFA	Sub-Saharan Africa	Official bilateral	India	India (Official bilateral)	14428	1.59908e+07	0.000902269
Burkina Faso	BFA	Sub-Saharan Africa	Official bilateral	Libya	Libya (Official bilateral)	6919	1.59908e+07	0.000432686
Burkina Faso	BFA	Sub-Saharan Africa	Official bilateral	Belgium	Belgium (Official bilateral)	6343	1.59908e+07	0.000396665
Burkina Faso	BFA	Sub-Saharan Africa	Official bilateral	United Arab Emirates	United Arab Emirates (Official bilateral)	431	1.59908e+07	2.6953e-05
Burkina Faso	BFA	Sub-Saharan Africa	Official multilateral	World Bank-IDA	World Bank-IDA (Official multilateral)	1672631	1.59908e+07	0.1046
Burkina Faso	BFA	Sub-Saharan Africa	Official multilateral	Other Multilaterals	Other Multilaterals (Official multilateral)	770525	1.59908e+07	0.0481855
Burkina Faso	BFA	Sub-Saharan Africa	Official multilateral	African Dev. Bank	African Dev. Bank (Official multilateral)	559672	1.59908e+07	0.0349996
Burkina Faso	BFA	Sub-Saharan Africa	Official multilateral	International Monetary Fund	International Monetary Fund (Official multilateral)	309646	1.59908e+07	0.019364
Burkina Faso	BFA	Sub-Saharan Africa	Non-official	Other Non-official		12133	1.59908e+07	0.000758749
Burkina Faso	BFA	Sub-Saharan Africa	Total		(Total)	3652090	1.59908e+07	0.228387
Burkina Faso	BFA	Sub-Saharan Africa	Total Non-official		(Total Non-official)	12133	1.59908e+07	0.000758749
Burkina Faso	BFA	Sub-Saharan Africa	Total Official bilateral		(Total Official bilateral)	327482	1.59908e+07	0.0204794
Burkina Faso	BFA	Sub-Saharan Africa	Total Official multilateral		(Total Official multilateral)	3312475	1.59908e+07	0.207149
Burundi	BDI	Sub-Saharan Africa	Official bilateral	India	India (Official bilateral)	36691	3.01233e+06	0.0121803
Burundi	BDI	Sub-Saharan Africa	Official bilateral	Saudi Arabia	Saudi Arabia (Official bilateral)	33186	3.01233e+06	0.0110167
Burundi	BDI	Sub-Saharan Africa	Official bilateral	Kuwait	Kuwait (Official bilateral)	21439	3.01233e+06	0.00711707
Burundi	BDI	Sub-Saharan Africa	Official bilateral	China	China (Official bilateral)	13907	3.01233e+06	0.00461668
Burundi	BDI	Sub-Saharan Africa	Official bilateral	Libya	Libya (Official bilateral)	4375	3.01233e+06	0.00145236
Burundi	BDI	Sub-Saharan Africa	Official bilateral	United Arab Emirates	United Arab Emirates (Official bilateral)	823	3.01233e+06	0.00027321
Burundi	BDI	Sub-Saharan Africa	Official multilateral	Other multilateral	Other multilateral (Official multilateral)	149964	3.01233e+06	0.0497833
Burundi	BDI	Sub-Saharan Africa	Official multilateral	International Monetary Fund	International Monetary Fund (Official multilateral)	149136	3.01233e+06	0.0495084
Burundi	BDI	Sub-Saharan Africa	Official multilateral	World Bank-IDA	World Bank-IDA (Official multilateral)	137531	3.01233e+06	0.0456559
Burundi	BDI	Sub-Saharan Africa	Official multilateral	African Dev. Bank	African Dev. Bank (Official multilateral)	31033	3.01233e+06	0.010302
Burundi	BDI	Sub-Saharan Africa	Total		(Total)	578085	3.01233e+06	0.191906
Burundi	BDI	Sub-Saharan Africa	Total Official bilateral		(Total Official bilateral)	110420	3.01233e+06	0.036656
Burundi	BDI	Sub-Saharan Africa	Total Official multilateral		(Total Official multilateral)	467664	3.01233e+06	0.15525
Cabo Verde	CPV	Sub-Saharan Africa	Non-official	Portugal	Portugal (Non-official)	504514	1.98185e+06	0.254568
Cabo Verde	CPV	Sub-Saharan Africa	Non-official	Belgium		2468	1.98185e+06	0.0012453
Cabo Verde	CPV	Sub-Saharan Africa	Official bilateral	Portugal	Portugal (Official bilateral)	155495	1.98185e+06	0.0784597
Cabo Verde	CPV	Sub-Saharan Africa	Official bilateral	Japan	Japan (Official bilateral)	92275	1.98185e+06	0.0465601
Cabo Verde	CPV	Sub-Saharan Africa	Official bilateral	France	France (Official bilateral)	53319	1.98185e+06	0.0269037
Cabo Verde	CPV	Sub-Saharan Africa	Official bilateral	Spain	Spain (Official bilateral)	43816	1.98185e+06	0.0221087
Cabo Verde	CPV	Sub-Saharan Africa	Official bilateral	China	China (Official bilateral)	30179	1.98185e+06	0.0152277
Cabo Verde	CPV	Sub-Saharan Africa	Official bilateral	Saudi Arabia	Saudi Arabia (Official bilateral)	19041	1.98185e+06	0.00960771
Cabo Verde	CPV	Sub-Saharan Africa	Official bilateral	Kuwait	Kuwait (Official bilateral)	12651	1.98185e+06	0.00638344
Cabo Verde	CPV	Sub-Saharan Africa	Official bilateral	Austria	Austria (Official bilateral)	11663	1.98185e+06	0.00588492
Cabo Verde	CPV	Sub-Saharan Africa	Official bilateral	Belgium	Belgium (Official bilateral)	610	1.98185e+06	0.000307794
Cabo Verde	CPV	Sub-Saharan Africa	Official multilateral	World Bank-IDA	World Bank-IDA (Official multilateral)	366347	1.98185e+06	0.184851
Cabo Verde	CPV	Sub-Saharan Africa	Official multilateral	African Dev. Bank	African Dev. Bank (Official multilateral)	324703	1.98185e+06	0.163839
Cabo Verde	CPV	Sub-Saharan Africa	Official multilateral	Other multilateral	Other multilateral (Official multilateral)	151650	1.98185e+06	0.0765196
Cabo Verde	CPV	Sub-Saharan Africa	Official multilateral	World Bank-IBRD	World Bank-IBRD (Official multilateral)	39754	1.98185e+06	0.0200591
Cabo Verde	CPV	Sub-Saharan Africa	Official multilateral	International Monetary Fund	International Monetary Fund (Official multilateral)	12679	1.98185e+06	0.00639757
Cabo Verde	CPV	Sub-Saharan Africa	Total		(Total)	1821164	1.98185e+06	0.918923
Cabo Verde	CPV	Sub-Saharan Africa	Total Non-official		(Total Non-official)	506983	1.98185e+06	0.255814
Cabo Verde	CPV	Sub-Saharan Africa	Total Official bilateral		(Total Official bilateral)	419049	1.98185e+06	0.211444
Cabo Verde	CPV	Sub-Saharan Africa	Total Official multilateral		(Total Official multilateral)	895132	1.98185e+06	0.451666
Cambodia	KHM	East Asia & Pacific	Official bilateral	China	China (Official bilateral)	3608596	2.70894e+07	0.133211
Cambodia	KHM	East Asia & Pacific	Official bilateral	Russian Federation	Russian Federation (Official bilateral)	457776	2.70894e+07	0.0168987
Cambodia	KHM	East Asia & Pacific	Official bilateral	Japan	Japan (Official bilateral)	407084	2.70894e+07	0.0150274
Cambodia	KHM	East Asia & Pacific	Official bilateral	Other bilateral	Other bilateral (Official bilateral)	390196	2.70894e+07	0.014404
Cambodia	KHM	East Asia & Pacific	Official bilateral	France	France (Official bilateral)	337209	2.70894e+07	0.012448
Cambodia	KHM	East Asia & Pacific	Official bilateral	United States	United States (Official bilateral)	162269	2.70894e+07	0.00599013
Cambodia	KHM	East Asia & Pacific	Official bilateral	Thailand	Thailand (Official bilateral)	53881	2.70894e+07	0.00198901
Cambodia	KHM	East Asia & Pacific	Official bilateral	India	India (Official bilateral)	30226	2.70894e+07	0.00111579
Cambodia	KHM	East Asia & Pacific	Official bilateral	Germany	Germany (Official bilateral)	943	2.70894e+07	3.48107e-05
Cambodia	KHM	East Asia & Pacific	Official multilateral	Asian Dev. Bank	Asian Dev. Bank (Official multilateral)	1404424	2.70894e+07	0.0518441
Cambodia	KHM	East Asia & Pacific	Official multilateral	World Bank-IDA	World Bank-IDA (Official multilateral)	584540	2.70894e+07	0.0215782
Cambodia	KHM	East Asia & Pacific	Official multilateral	International Monetary Fund	International Monetary Fund (Official multilateral)	116047	2.70894e+07	0.00428385
Cambodia	KHM	East Asia & Pacific	Official multilateral	Other multilateral	Other multilateral (Official multilateral)	113484	2.70894e+07	0.00418924
Cambodia	KHM	East Asia & Pacific	Total		(Total)	7666674	2.70894e+07	0.283014
Cambodia	KHM	East Asia & Pacific	Total Official bilateral		(Total Official bilateral)	5448179	2.70894e+07	0.201119
Cambodia	KHM	East Asia & Pacific	Total Official multilateral		(Total Official multilateral)	2218495	2.70894e+07	0.0818953
Cameroon	CMR	Sub-Saharan Africa	Bondholders	Bond market	Bond market (Bondholders)	686562	3.90074e+07	0.0176008
Cameroon	CMR	Sub-Saharan Africa	Non-official	United Kingdom	United Kingdom (Non-official)	209023	3.90074e+07	0.00535855
Cameroon	CMR	Sub-Saharan Africa	Non-official	China	China (Non-official)	178080	3.90074e+07	0.00456529
Cameroon	CMR	Sub-Saharan Africa	Non-official	Switzerland	Switzerland (Non-official)	84881	3.90074e+07	0.00217603
Cameroon	CMR	Sub-Saharan Africa	Non-official	Belgium	Belgium (Non-official)	55872	3.90074e+07	0.00143235
Cameroon	CMR	Sub-Saharan Africa	Non-official	Multiple lenders	Multiple lenders (Non-official)	45862	3.90074e+07	0.00117573
Cameroon	CMR	Sub-Saharan Africa	Non-official	Germany	Germany (Non-official)	40744	3.90074e+07	0.00104452
Cameroon	CMR	Sub-Saharan Africa	Non-official	Austria	Austria (Non-official)	10111	3.90074e+07	0.000259208
Cameroon	CMR	Sub-Saharan Africa	Non-official	France	France (Non-official)	6664	3.90074e+07	0.00017084
Cameroon	CMR	Sub-Saharan Africa	Non-official	United Arab Emirates	United Arab Emirates (Non-official)	2107	3.90074e+07	5.40155e-05
Cameroon	CMR	Sub-Saharan Africa	Non-official	Spain	Spain (Non-official)	1220	3.90074e+07	3.12762e-05
Cameroon	CMR	Sub-Saharan Africa	Official bilateral	China	China (Official bilateral)	3448534	3.90074e+07	0.0884073
Cameroon	CMR	Sub-Saharan Africa	Official bilateral	France	France (Official bilateral)	1123206	3.90074e+07	0.0287947
Cameroon	CMR	Sub-Saharan Africa	Official bilateral	Turkey	Turkey (Official bilateral)	183298	3.90074e+07	0.00469906
Cameroon	CMR	Sub-Saharan Africa	Official bilateral	United States	United States (Official bilateral)	122100	3.90074e+07	0.00313018
Cameroon	CMR	Sub-Saharan Africa	Official bilateral	Japan	Japan (Official bilateral)	86684	3.90074e+07	0.00222225
Cameroon	CMR	Sub-Saharan Africa	Official bilateral	Norway	Norway (Official bilateral)	56783	3.90074e+07	0.0014557
Cameroon	CMR	Sub-Saharan Africa	Official bilateral	India	India (Official bilateral)	50922	3.90074e+07	0.00130545
Cameroon	CMR	Sub-Saharan Africa	Official bilateral	Other bilateral	Other bilateral (Official bilateral)	32452	3.90074e+07	0.000831946
Cameroon	CMR	Sub-Saharan Africa	Official bilateral	Germany	Germany (Official bilateral)	28364	3.90074e+07	0.000727145
Cameroon	CMR	Sub-Saharan Africa	Official bilateral	Kuwait	Kuwait (Official bilateral)	20795	3.90074e+07	0.000533105
Cameroon	CMR	Sub-Saharan Africa	Official bilateral	Belgium	Belgium (Official bilateral)	15583	3.90074e+07	0.000399489
Cameroon	CMR	Sub-Saharan Africa	Official bilateral	Saudi Arabia	Saudi Arabia (Official bilateral)	10850	3.90074e+07	0.000278153
Cameroon	CMR	Sub-Saharan Africa	Official bilateral	Spain	Spain (Official bilateral)	6361	3.90074e+07	0.000163072
Cameroon	CMR	Sub-Saharan Africa	Official multilateral	World Bank-IDA	World Bank-IDA (Official multilateral)	1480985	3.90074e+07	0.0379668
Cameroon	CMR	Sub-Saharan Africa	Official multilateral	African Dev. Bank	African Dev. Bank (Official multilateral)	1142293	3.90074e+07	0.029284
Cameroon	CMR	Sub-Saharan Africa	Official multilateral	Other multilateral	Other multilateral (Official multilateral)	892540	3.90074e+07	0.0228813
Cameroon	CMR	Sub-Saharan Africa	Official multilateral	International Monetary Fund	International Monetary Fund (Official multilateral)	760370	3.90074e+07	0.019493
Cameroon	CMR	Sub-Saharan Africa	Official multilateral	World Bank-IBRD	World Bank-IBRD (Official multilateral)	251860	3.90074e+07	0.00645673
Cameroon	CMR	Sub-Saharan Africa	Total		(Total)	11035104	3.90074e+07	0.282898
Cameroon	CMR	Sub-Saharan Africa	Total Bondholders		(Total Bondholders)	686562	3.90074e+07	0.0176008
Cameroon	CMR	Sub-Saharan Africa	Total Non-official		(Total Non-official)	634563	3.90074e+07	0.0162678
Cameroon	CMR	Sub-Saharan Africa	Total Official bilateral		(Total Official bilateral)	5185931	3.90074e+07	0.132948
Cameroon	CMR	Sub-Saharan Africa	Total Official multilateral		(Total Official multilateral)	4528048	3.90074e+07	0.116082
Central African Republic	CAF	Sub-Saharan Africa	Non-official	Serbia	Serbia (Non-official)	23576	2.22031e+06	0.0106183
Central African Republic	CAF	Sub-Saharan Africa	Non-official	Angola	Angola (Non-official)	20000	2.22031e+06	0.00900776
Central African Republic	CAF	Sub-Saharan Africa	Non-official	Switzerland	Switzerland (Non-official)	1935	2.22031e+06	0.000871501
Central African Republic	CAF	Sub-Saharan Africa	Non-official	France	France (Non-official)	374	2.22031e+06	0.000168445
Central African Republic	CAF	Sub-Saharan Africa	Official bilateral	India	India (Official bilateral)	82368	2.22031e+06	0.0370976
Central African Republic	CAF	Sub-Saharan Africa	Official bilateral	Other Bilateral	Other Bilateral (Official bilateral)	62630	2.22031e+06	0.0282078
Central African Republic	CAF	Sub-Saharan Africa	Official bilateral	China	China (Official bilateral)	42160	2.22031e+06	0.0189884
Central African Republic	CAF	Sub-Saharan Africa	Official bilateral	Saudi Arabia	Saudi Arabia (Official bilateral)	31799	2.22031e+06	0.0143219
Central African Republic	CAF	Sub-Saharan Africa	Official bilateral	Kuwait	Kuwait (Official bilateral)	20683	2.22031e+06	0.00931538
Central African Republic	CAF	Sub-Saharan Africa	Official bilateral	Libya	Libya (Official bilateral)	12008	2.22031e+06	0.00540826
Central African Republic	CAF	Sub-Saharan Africa	Official bilateral	France	France (Official bilateral)	5688	2.22031e+06	0.00256181
Central African Republic	CAF	Sub-Saharan Africa	Official multilateral	International Monetary Fund	International Monetary Fund (Official multilateral)	296485	2.22031e+06	0.133533
Central African Republic	CAF	Sub-Saharan Africa	Official multilateral	World Bank-IDA	World Bank-IDA (Official multilateral)	106956	2.22031e+06	0.0481717
Central African Republic	CAF	Sub-Saharan Africa	Official multilateral	Other Multilaterals	Other Multilaterals (Official multilateral)	38327	2.22031e+06	0.017262
Central African Republic	CAF	Sub-Saharan Africa	Official multilateral	African Dev. Bank	African Dev. Bank (Official multilateral)	5115	2.22031e+06	0.00230374
Central African Republic	CAF	Sub-Saharan Africa	Total		(Total)	750104	2.22031e+06	0.337838
Central African Republic	CAF	Sub-Saharan Africa	Total Non-official		(Total Non-official)	45885	2.22031e+06	0.0206661
Central African Republic	CAF	Sub-Saharan Africa	Total Official bilateral		(Total Official bilateral)	257337	2.22031e+06	0.115902
Central African Republic	CAF	Sub-Saharan Africa	Total Official multilateral		(Total Official multilateral)	446882	2.22031e+06	0.20127
Chad	TCD	Sub-Saharan Africa	Non-official	Saudi Arabia	Saudi Arabia (Non-official)	3000	1.1315e+07	0.000265136
Chad	TCD	Sub-Saharan Africa	Non-official	United Kingdom	United Kingdom (Non-official)	1535617	1.1315e+07	0.135716
Chad	TCD	Sub-Saharan Africa	Official bilateral	China	China (Official bilateral)	235247	1.1315e+07	0.0207908
Chad	TCD	Sub-Saharan Africa	Official bilateral	France	France (Official bilateral)	89894	1.1315e+07	0.00794471
Chad	TCD	Sub-Saharan Africa	Official bilateral	India	India (Official bilateral)	47793	1.1315e+07	0.00422388
Chad	TCD	Sub-Saharan Africa	Official bilateral	Kuwait	Kuwait (Official bilateral)	5455	1.1315e+07	0.000482105
Chad	TCD	Sub-Saharan Africa	Official bilateral	Libya	Libya (Official bilateral)	245780	1.1315e+07	0.0217217
Chad	TCD	Sub-Saharan Africa	Official bilateral	Other bilateral	Other bilateral (Official bilateral)	257432	1.1315e+07	0.0227515
Chad	TCD	Sub-Saharan Africa	Official bilateral	Saudi Arabia	Saudi Arabia (Official bilateral)	2720	1.1315e+07	0.00024039
Chad	TCD	Sub-Saharan Africa	Official multilateral	African Dev. Bank	African Dev. Bank (Official multilateral)	127801	1.1315e+07	0.0112949
Chad	TCD	Sub-Saharan Africa	Official multilateral	International Monetary Fund	International Monetary Fund (Official multilateral)	469812	1.1315e+07	0.0415213
Chad	TCD	Sub-Saharan Africa	Official multilateral	Other multilateral	Other multilateral (Official multilateral)	348237	1.1315e+07	0.0307767
Chad	TCD	Sub-Saharan Africa	Official multilateral	World Bank-IDA	World Bank-IDA (Official multilateral)	176194	1.1315e+07	0.0155718
Chad	TCD	Sub-Saharan Africa	Total		(Total)	3544982	1.1315e+07	0.313301
Chad	TCD	Sub-Saharan Africa	Total Non-official		(Total Non-official)	1538617	1.1315e+07	0.135981
Chad	TCD	Sub-Saharan Africa	Total Official bilateral		(Total Official bilateral)	884321	1.1315e+07	0.0781551
Chad	TCD	Sub-Saharan Africa	Total Official multilateral		(Total Official multilateral)	1122044	1.1315e+07	0.0991647
Comoros	COM	Sub-Saharan Africa	Official bilateral	China	China (Official bilateral)	77727	1.16584e+06	0.0666704
Comoros	COM	Sub-Saharan Africa	Official bilateral	India	India (Official bilateral)	36984	1.16584e+06	0.0317231
Comoros	COM	Sub-Saharan Africa	Official bilateral	Other bilateral	Other bilateral (Official bilateral)	28044	1.16584e+06	0.0240548
Comoros	COM	Sub-Saharan Africa	Official bilateral	Kuwait	Kuwait (Official bilateral)	25016	1.16584e+06	0.0214575
Comoros	COM	Sub-Saharan Africa	Official bilateral	France	France (Official bilateral)	7512	1.16584e+06	0.00644342
Comoros	COM	Sub-Saharan Africa	Official multilateral	Other multilateral	Other multilateral (Official multilateral)	78032	1.16584e+06	0.066932
Comoros	COM	Sub-Saharan Africa	Official multilateral	International Monetary Fund	International Monetary Fund (Official multilateral)	30742	1.16584e+06	0.026369
Comoros	COM	Sub-Saharan Africa	Official multilateral	World Bank-IDA	World Bank-IDA (Official multilateral)	12320	1.16584e+06	0.0105675
Comoros	COM	Sub-Saharan Africa	Official multilateral	African Dev. Bank	African Dev. Bank (Official multilateral)	1521	1.16584e+06	0.00130464
Comoros	COM	Sub-Saharan Africa	Total		(Total)	243321	1.16584e+06	0.208709
Comoros	COM	Sub-Saharan Africa	Total Official bilateral		(Total Official bilateral)	175283	1.16584e+06	0.150349
Comoros	COM	Sub-Saharan Africa	Total Official multilateral		(Total Official multilateral)	122614	1.16584e+06	0.105172
Congo, Dem. Rep.	COD	Sub-Saharan Africa	Non-official	Belgium	Belgium (Non-official)	55549	5.04007e+07	0.00110215
Congo, Dem. Rep.	COD	Sub-Saharan Africa	Non-official	Cote D`Ivoire, Republic Of	Cote D`Ivoire, Republic Of (Non-official)	22441	5.04007e+07	0.000445251
Congo, Dem. Rep.	COD	Sub-Saharan Africa	Non-official	United Kingdom	United Kingdom (Non-official)	10834	5.04007e+07	0.000214957
Congo, Dem. Rep.	COD	Sub-Saharan Africa	Non-official	United States	United States (Non-official)	7666	5.04007e+07	0.000152101
Congo, Dem. Rep.	COD	Sub-Saharan Africa	Non-official	Greece	Greece (Non-official)	3798	5.04007e+07	7.5356e-05
Congo, Dem. Rep.	COD	Sub-Saharan Africa	Non-official	Portugal	Portugal (Non-official)	1379	5.04007e+07	2.73607e-05
Congo, Dem. Rep.	COD	Sub-Saharan Africa	Non-official	Brazil	Brazil (Non-official)	529	5.04007e+07	1.04959e-05
Congo, Dem. Rep.	COD	Sub-Saharan Africa	Official bilateral	Multiple Lenders	Multiple Lenders (Official bilateral)	1109244	5.04007e+07	0.0220085
Congo, Dem. Rep.	COD	Sub-Saharan Africa	Official bilateral	China	China (Official bilateral)	456443	5.04007e+07	0.00905627
Congo, Dem. Rep.	COD	Sub-Saharan Africa	Official bilateral	India	India (Official bilateral)	184396	5.04007e+07	0.0036586
Congo, Dem. Rep.	COD	Sub-Saharan Africa	Official bilateral	France	France (Official bilateral)	73374	5.04007e+07	0.00145581
Congo, Dem. Rep.	COD	Sub-Saharan Africa	Official bilateral	Other Bilateral	Other Bilateral (Official bilateral)	27010	5.04007e+07	0.000535905
Congo, Dem. Rep.	COD	Sub-Saharan Africa	Official bilateral	Saudi Arabia	Saudi Arabia (Official bilateral)	14941	5.04007e+07	0.000296444
Congo, Dem. Rep.	COD	Sub-Saharan Africa	Official bilateral	Kuwait	Kuwait (Official bilateral)	9230	5.04007e+07	0.000183132
Congo, Dem. Rep.	COD	Sub-Saharan Africa	Official multilateral	World Bank-IDA	World Bank-IDA (Official multilateral)	1287657	5.04007e+07	0.0255484
Congo, Dem. Rep.	COD	Sub-Saharan Africa	Official multilateral	International Monetary Fund	International Monetary Fund (Official multilateral)	1129701	5.04007e+07	0.0224144
Congo, Dem. Rep.	COD	Sub-Saharan Africa	Official multilateral	Other Multilaterals	Other Multilaterals (Official multilateral)	425850	5.04007e+07	0.00844928
Congo, Dem. Rep.	COD	Sub-Saharan Africa	Official multilateral	African Dev. Bank	African Dev. Bank (Official multilateral)	408570	5.04007e+07	0.00810643
Congo, Dem. Rep.	COD	Sub-Saharan Africa	Total		(Total)	5228610	5.04007e+07	0.103741
Congo, Dem. Rep.	COD	Sub-Saharan Africa	Total Non-official		(Total Non-official)	102196	5.04007e+07	0.00202767
Congo, Dem. Rep.	COD	Sub-Saharan Africa	Total Official bilateral		(Total Official bilateral)	1874637	5.04007e+07	0.0371946
Congo, Dem. Rep.	COD	Sub-Saharan Africa	Total Official multilateral		(Total Official multilateral)	3251777	5.04007e+07	0.0645184
Congo, Rep.	COG	Sub-Saharan Africa	Bondholders	Bond market	Bond market (Bondholders)	295035	1.22674e+07	0.0240503
Congo, Rep.	COG	Sub-Saharan Africa	Non-official	Multiple lenders	Multiple lenders (Non-official)	70046	1.22674e+07	0.00570993
Congo, Rep.	COG	Sub-Saharan Africa	Non-official	France	France (Non-official)	5336	1.22674e+07	0.000434974
Congo, Rep.	COG	Sub-Saharan Africa	Non-official	Brazil	Brazil (Non-official)	1652	1.22674e+07	0.000134666
Congo, Rep.	COG	Sub-Saharan Africa	Non-official	United Arab Emirates	United Arab Emirates (Non-official)	402	1.22674e+07	3.27698e-05
Congo, Rep.	COG	Sub-Saharan Africa	Non-official	Belgium	Belgium (Non-official)	282	1.22674e+07	2.29878e-05
Congo, Rep.	COG	Sub-Saharan Africa	Non-official	Italy	Italy (Non-official)	95	1.22674e+07	7.74411e-06
Congo, Rep.	COG	Sub-Saharan Africa	Official bilateral	China	China (Official bilateral)	3751870	1.22674e+07	0.305841
Congo, Rep.	COG	Sub-Saharan Africa	Official bilateral	Multiple lenders	Multiple lenders (Official bilateral)	224779	1.22674e+07	0.0183233
Congo, Rep.	COG	Sub-Saharan Africa	Official bilateral	France	France (Official bilateral)	165241	1.22674e+07	0.0134699
Congo, Rep.	COG	Sub-Saharan Africa	Official bilateral	India	India (Official bilateral)	95841	1.22674e+07	0.00781266
Congo, Rep.	COG	Sub-Saharan Africa	Official bilateral	Saudi Arabia	Saudi Arabia (Official bilateral)	78652	1.22674e+07	0.00641147
Congo, Rep.	COG	Sub-Saharan Africa	Official bilateral	Turkey	Turkey (Official bilateral)	74930	1.22674e+07	0.00610806
Congo, Rep.	COG	Sub-Saharan Africa	Official bilateral	Kuwait	Kuwait (Official bilateral)	54697	1.22674e+07	0.00445873
Congo, Rep.	COG	Sub-Saharan Africa	Official bilateral	Brazil	Brazil (Official bilateral)	50017	1.22674e+07	0.00407723
Congo, Rep.	COG	Sub-Saharan Africa	Official bilateral	Other bilateral	Other bilateral (Official bilateral)	28636	1.22674e+07	0.00233432
Congo, Rep.	COG	Sub-Saharan Africa	Official bilateral	United Arab Emirates	United Arab Emirates (Official bilateral)	9534	1.22674e+07	0.000777182
Congo, Rep.	COG	Sub-Saharan Africa	Official multilateral	African Dev. Bank	African Dev. Bank (Official multilateral)	358220	1.22674e+07	0.029201
Congo, Rep.	COG	Sub-Saharan Africa	Official multilateral	Other multilateral	Other multilateral (Official multilateral)	292569	1.22674e+07	0.0238493
Congo, Rep.	COG	Sub-Saharan Africa	Official multilateral	World Bank-IDA	World Bank-IDA (Official multilateral)	196725	1.22674e+07	0.0160364
Congo, Rep.	COG	Sub-Saharan Africa	Official multilateral	International Monetary Fund	International Monetary Fund (Official multilateral)	157172	1.22674e+07	0.0128122
Congo, Rep.	COG	Sub-Saharan Africa	Official multilateral	World Bank-IBRD	World Bank-IBRD (Official multilateral)	46471	1.22674e+07	0.00378817
Congo, Rep.	COG	Sub-Saharan Africa	Total		(Total)	5958202	1.22674e+07	0.485694
Congo, Rep.	COG	Sub-Saharan Africa	Total Bondholders		(Total Bondholders)	295035	1.22674e+07	0.0240503
Congo, Rep.	COG	Sub-Saharan Africa	Total Non-official		(Total Non-official)	77813	1.22674e+07	0.00634308
Congo, Rep.	COG	Sub-Saharan Africa	Total Official bilateral		(Total Official bilateral)	4534197	1.22674e+07	0.369614
Congo, Rep.	COG	Sub-Saharan Africa	Total Official multilateral		(Total Official multilateral)	1051156	1.22674e+07	0.085687
Côte d'Ivoire	CIV	Sub-Saharan Africa	Bondholders	Bond market	Bond market (Bondholders)	7588982	5.85394e+07	0.129639
Côte d'Ivoire	CIV	Sub-Saharan Africa	Non-official	Belgium	Belgium (Non-official)	31342	5.85394e+07	0.0005354
Côte d'Ivoire	CIV	Sub-Saharan Africa	Non-official	China	China (Non-official)	150061	5.85394e+07	0.00256342
Côte d'Ivoire	CIV	Sub-Saharan Africa	Non-official	Czech Republic	Czech Republic (Non-official)	100623	5.85394e+07	0.00171889
Côte d'Ivoire	CIV	Sub-Saharan Africa	Non-official	France		617026	5.85394e+07	0.0105403
Côte d'Ivoire	CIV	Sub-Saharan Africa	Non-official	Japan		396257	5.85394e+07	0.00676906
Côte d'Ivoire	CIV	Sub-Saharan Africa	Non-official	United Kingdom	United Kingdom (Non-official)	258382	5.85394e+07	0.00441381
Côte d'Ivoire	CIV	Sub-Saharan Africa	Official bilateral	China	China (Official bilateral)	2396523	5.85394e+07	0.0409386
Côte d'Ivoire	CIV	Sub-Saharan Africa	Official bilateral	France	France (Official bilateral)	638086	5.85394e+07	0.0109001
Côte d'Ivoire	CIV	Sub-Saharan Africa	Official bilateral	Germany	Germany (Official bilateral)	590	5.85394e+07	1.00787e-05
Côte d'Ivoire	CIV	Sub-Saharan Africa	Official bilateral	India	India (Official bilateral)	229195	5.85394e+07	0.00391522
Côte d'Ivoire	CIV	Sub-Saharan Africa	Official bilateral	Japan		1026	5.85394e+07	1.75266e-05
Côte d'Ivoire	CIV	Sub-Saharan Africa	Official bilateral	Kuwait	Kuwait (Official bilateral)	31625	5.85394e+07	0.000540234
Côte d'Ivoire	CIV	Sub-Saharan Africa	Official bilateral	Other bilateral	Other bilateral (Official bilateral)	17943	5.85394e+07	0.000306511
Côte d'Ivoire	CIV	Sub-Saharan Africa	Official bilateral	Saudi Arabia	Saudi Arabia (Official bilateral)	20765	5.85394e+07	0.000354718
Côte d'Ivoire	CIV	Sub-Saharan Africa	Official bilateral	Spain	Spain (Official bilateral)	25831	5.85394e+07	0.000441258
Côte d'Ivoire	CIV	Sub-Saharan Africa	Official bilateral	United States	United States (Official bilateral)	2084	5.85394e+07	3.55999e-05
Côte d'Ivoire	CIV	Sub-Saharan Africa	Official multilateral	African Dev. Bank	African Dev. Bank (Official multilateral)	436463	5.85394e+07	0.00745588
Côte d'Ivoire	CIV	Sub-Saharan Africa	Official multilateral	International Monetary Fund	International Monetary Fund (Official multilateral)	1914818	5.85394e+07	0.0327099
Côte d'Ivoire	CIV	Sub-Saharan Africa	Official multilateral	Other multilateral	Other multilateral (Official multilateral)	951768	5.85394e+07	0.0162586
Côte d'Ivoire	CIV	Sub-Saharan Africa	Official multilateral	World Bank-IBRD	World Bank-IBRD (Official multilateral)	29900	5.85394e+07	0.000510767
Côte d'Ivoire	CIV	Sub-Saharan Africa	Official multilateral	World Bank-IDA	World Bank-IDA (Official multilateral)	1174245	5.85394e+07	0.020059
Côte d'Ivoire	CIV	Sub-Saharan Africa	Total		(Total)	17013534	5.85394e+07	0.290634
Côte d'Ivoire	CIV	Sub-Saharan Africa	Total Bondholders		(Total Bondholders)	7588982	5.85394e+07	0.129639
Côte d'Ivoire	CIV	Sub-Saharan Africa	Total Non-official		(Total Non-official)	1553691	5.85394e+07	0.0265409
Côte d'Ivoire	CIV	Sub-Saharan Africa	Total Official bilateral		(Total Official bilateral)	3363668	5.85394e+07	0.0574599
Côte d'Ivoire	CIV	Sub-Saharan Africa	Total Official multilateral		(Total Official multilateral)	4507193	5.85394e+07	0.0769941
Djibouti	DJI	Middle East & North Africa	Non-official	Spain	Spain (Non-official)	3599	3.32463e+06	0.00108253
Djibouti	DJI	Middle East & North Africa	Official bilateral	Belgium	Belgium (Official bilateral)	103	3.32463e+06	3.09809e-05
Djibouti	DJI	Middle East & North Africa	Official bilateral	China	China (Official bilateral)	1195470	3.32463e+06	0.359579
Djibouti	DJI	Middle East & North Africa	Official bilateral	France	France (Official bilateral)	3135	3.32463e+06	0.000942961
Djibouti	DJI	Middle East & North Africa	Official bilateral	India	India (Official bilateral)	38527	3.32463e+06	0.0115883
Djibouti	DJI	Middle East & North Africa	Official bilateral	Italy	Italy (Official bilateral)	9953	3.32463e+06	0.00299371
Djibouti	DJI	Middle East & North Africa	Official bilateral	Kuwait	Kuwait (Official bilateral)	44663	3.32463e+06	0.013434
Djibouti	DJI	Middle East & North Africa	Official bilateral	Other bilateral	Other bilateral (Official bilateral)	11749	3.32463e+06	0.00353392
Djibouti	DJI	Middle East & North Africa	Official bilateral	Saudi Arabia	Saudi Arabia (Official bilateral)	163927	3.32463e+06	0.0493068
Djibouti	DJI	Middle East & North Africa	Official bilateral	Spain	Spain (Official bilateral)	32220	3.32463e+06	0.00969129
Djibouti	DJI	Middle East & North Africa	Official bilateral	Turkey	Turkey (Official bilateral)	733	3.32463e+06	0.000220475
Djibouti	DJI	Middle East & North Africa	Official bilateral	United Arab Emirates	United Arab Emirates (Official bilateral)	7528	3.32463e+06	0.00226431
Djibouti	DJI	Middle East & North Africa	Official multilateral	African Dev. Bank	African Dev. Bank (Official multilateral)	112928	3.32463e+06	0.033967
Djibouti	DJI	Middle East & North Africa	Official multilateral	International Monetary Fund	International Monetary Fund (Official multilateral)	31639	3.32463e+06	0.00951654
Djibouti	DJI	Middle East & North Africa	Official multilateral	Other multilateral	Other multilateral (Official multilateral)	359550	3.32463e+06	0.108147
Djibouti	DJI	Middle East & North Africa	Official multilateral	World Bank-IDA	World Bank-IDA (Official multilateral)	161260	3.32463e+06	0.0485046
Djibouti	DJI	Middle East & North Africa	Total		(Total)	2176985	3.32463e+06	0.654804
Djibouti	DJI	Middle East & North Africa	Total Non-official		(Total Non-official)	3599	3.32463e+06	0.00108253
Djibouti	DJI	Middle East & North Africa	Total Official bilateral		(Total Official bilateral)	1508008	3.32463e+06	0.453586
Djibouti	DJI	Middle East & North Africa	Total Official multilateral		(Total Official multilateral)	665377	3.32463e+06	0.200135
Dominica	DMA	Latin America & Caribbean	Bondholders	Bond market	Bond market (Bondholders)	44961	582404	0.077199
Dominica	DMA	Latin America & Caribbean	Non-official	Barbados	Barbados (Non-official)	728	582404	0.00124999
Dominica	DMA	Latin America & Caribbean	Non-official	Grenada	Grenada (Non-official)	409	582404	0.000702262
Dominica	DMA	Latin America & Caribbean	Non-official	St. Kitts And Nevis	St. Kitts And Nevis (Non-official)	19	582404	3.26234e-05
Dominica	DMA	Latin America & Caribbean	Non-official	St. Lucia	St. Lucia (Non-official)	574	582404	0.000985571
Dominica	DMA	Latin America & Caribbean	Non-official	St. Vincent and The Grenadines	St. Vincent and The Grenadines (Non-official)	1789	582404	0.00307175
Dominica	DMA	Latin America & Caribbean	Non-official	Trinidad and Tobago	Trinidad and Tobago (Non-official)	8294	582404	0.014241
Dominica	DMA	Latin America & Caribbean	Non-official	United Kingdom	United Kingdom (Non-official)	7964	582404	0.0136744
Dominica	DMA	Latin America & Caribbean	Non-official	United States	United States (Non-official)	3082	582404	0.00529186
Dominica	DMA	Latin America & Caribbean	Non-official	Other Non-official		103	582404	0.000176853
Dominica	DMA	Latin America & Caribbean	Official bilateral	China	China (Official bilateral)	29456	582404	0.0505766
Dominica	DMA	Latin America & Caribbean	Official bilateral	France	France (Official bilateral)	18661	582404	0.0320413
Dominica	DMA	Latin America & Caribbean	Official bilateral	Kuwait	Kuwait (Official bilateral)	1383	582404	0.00237464
Dominica	DMA	Latin America & Caribbean	Official bilateral	Other bilateral	Other bilateral (Official bilateral)	7148	582404	0.0122733
Dominica	DMA	Latin America & Caribbean	Official bilateral	Venezuela, RB	Venezuela, RB (Official bilateral)	4018	582404	0.00689899
Dominica	DMA	Latin America & Caribbean	Official multilateral	International Monetary Fund	International Monetary Fund (Official multilateral)	20760	582404	0.0356454
Dominica	DMA	Latin America & Caribbean	Official multilateral	Other multilateral	Other multilateral (Official multilateral)	86520	582404	0.148557
Dominica	DMA	Latin America & Caribbean	Official multilateral	World Bank-IDA	World Bank-IDA (Official multilateral)	35556	582404	0.0610504
Dominica	DMA	Latin America & Caribbean	Total		(Total)	271424	582404	0.466041
Dominica	DMA	Latin America & Caribbean	Total Bondholders		(Total Bondholders)	44961	582404	0.077199
Dominica	DMA	Latin America & Caribbean	Total Non-official		(Total Non-official)	22962	582404	0.0394263
Dominica	DMA	Latin America & Caribbean	Total Official bilateral		(Total Official bilateral)	60665	582404	0.104163
Dominica	DMA	Latin America & Caribbean	Total Official multilateral		(Total Official multilateral)	142837	582404	0.245254
Ethiopia	ETH	Sub-Saharan Africa	Bondholders	Bond market	Bond market (Bondholders)	1000000	9.59126e+07	0.0104262
Ethiopia	ETH	Sub-Saharan Africa	Non-official	China	China (Non-official)	1816761	9.59126e+07	0.0189418
Ethiopia	ETH	Sub-Saharan Africa	Non-official	Egypt	Egypt (Non-official)	82	9.59126e+07	8.54945e-07
Ethiopia	ETH	Sub-Saharan Africa	Non-official	France	France (Non-official)	326062	9.59126e+07	0.00339957
Ethiopia	ETH	Sub-Saharan Africa	Non-official	India	India (Non-official)	11510	9.59126e+07	0.000120005
Ethiopia	ETH	Sub-Saharan Africa	Non-official	Israel	Israel (Non-official)	148386	9.59126e+07	0.0015471
Ethiopia	ETH	Sub-Saharan Africa	Non-official	Italy	Italy (Non-official)	382117	9.59126e+07	0.00398401
Ethiopia	ETH	Sub-Saharan Africa	Non-official	Japan	Japan (Non-official)	231783	9.59126e+07	0.00241661
Ethiopia	ETH	Sub-Saharan Africa	Non-official	Serbia	Serbia (Non-official)	4203	9.59126e+07	4.38211e-05
Ethiopia	ETH	Sub-Saharan Africa	Non-official	South Africa	South Africa (Non-official)	133651	9.59126e+07	0.00139347
Ethiopia	ETH	Sub-Saharan Africa	Non-official	Sweden	Sweden (Non-official)	119092	9.59126e+07	0.00124167
Ethiopia	ETH	Sub-Saharan Africa	Non-official	Switzerland	Switzerland (Non-official)	877271	9.59126e+07	0.00914657
Ethiopia	ETH	Sub-Saharan Africa	Non-official	United Arab Emirates	United Arab Emirates (Non-official)	11818	9.59126e+07	0.000123216
Ethiopia	ETH	Sub-Saharan Africa	Non-official	United Kingdom	United Kingdom (Non-official)	368040	9.59126e+07	0.00383724
Ethiopia	ETH	Sub-Saharan Africa	Non-official	United States	United States (Non-official)	1390624	9.59126e+07	0.0144989
Ethiopia	ETH	Sub-Saharan Africa	Official bilateral	Canada	Canada (Official bilateral)	72224	9.59126e+07	0.000753019
Ethiopia	ETH	Sub-Saharan Africa	Official bilateral	China	China (Official bilateral)	6534877	9.59126e+07	0.0681337
Ethiopia	ETH	Sub-Saharan Africa	Official bilateral	Czech Republic		61	9.59126e+07	6.35996e-07
Ethiopia	ETH	Sub-Saharan Africa	Official bilateral	France	France (Official bilateral)	232485	9.59126e+07	0.00242393
Ethiopia	ETH	Sub-Saharan Africa	Official bilateral	Germany	Germany (Official bilateral)	27569	9.59126e+07	0.000287439
Ethiopia	ETH	Sub-Saharan Africa	Official bilateral	India	India (Official bilateral)	376934	9.59126e+07	0.00392997
Ethiopia	ETH	Sub-Saharan Africa	Official bilateral	Italy	Italy (Official bilateral)	137090	9.59126e+07	0.00142932
Ethiopia	ETH	Sub-Saharan Africa	Official bilateral	Japan	Japan (Official bilateral)	50403	9.59126e+07	0.00052551
Ethiopia	ETH	Sub-Saharan Africa	Official bilateral	Kuwait	Kuwait (Official bilateral)	64719	9.59126e+07	0.000674771
Ethiopia	ETH	Sub-Saharan Africa	Official bilateral	Libya	Libya (Official bilateral)	237287	9.59126e+07	0.00247399
Ethiopia	ETH	Sub-Saharan Africa	Official bilateral	Russian Federation		161578	9.59126e+07	0.00168464
Ethiopia	ETH	Sub-Saharan Africa	Official bilateral	Other bilateral	Other bilateral (Official bilateral)	316256	9.59126e+07	0.00329734
Ethiopia	ETH	Sub-Saharan Africa	Official bilateral	Saudi Arabia	Saudi Arabia (Official bilateral)	36401	9.59126e+07	0.000379523
Ethiopia	ETH	Sub-Saharan Africa	Official bilateral	Turkey	Turkey (Official bilateral)	240000	9.59126e+07	0.00250228
Ethiopia	ETH	Sub-Saharan Africa	Official bilateral	United Arab Emirates	United Arab Emirates (Official bilateral)	77	9.59126e+07	8.02814e-07
Ethiopia	ETH	Sub-Saharan Africa	Official multilateral	African Dev. Bank	African Dev. Bank (Official multilateral)	2164834	9.59126e+07	0.0225709
Ethiopia	ETH	Sub-Saharan Africa	Official multilateral	International Monetary Fund	International Monetary Fund (Official multilateral)	318290	9.59126e+07	0.00331854
Ethiopia	ETH	Sub-Saharan Africa	Official multilateral	Other multilateral	Other multilateral (Official multilateral)	661281	9.59126e+07	0.00689462
Ethiopia	ETH	Sub-Saharan Africa	Official multilateral	World Bank-IDA	World Bank-IDA (Official multilateral)	9354350	9.59126e+07	0.0975299
Ethiopia	ETH	Sub-Saharan Africa	Total		(Total)	27808117	9.59126e+07	0.289932
Ethiopia	ETH	Sub-Saharan Africa	Total Bondholders		(Total Bondholders)	1000000	9.59126e+07	0.0104262
Ethiopia	ETH	Sub-Saharan Africa	Total Non-official		(Total Non-official)	5821399	9.59126e+07	0.0606948
Ethiopia	ETH	Sub-Saharan Africa	Total Official bilateral		(Total Official bilateral)	8487962	9.59126e+07	0.0884968
Ethiopia	ETH	Sub-Saharan Africa	Total Official multilateral		(Total Official multilateral)	12498756	9.59126e+07	0.130314
Fiji	FJI	East Asia & Pacific	Bondholders	Bond market	Bond market (Bondholders)	200000	5.49625e+06	0.0363884
Fiji	FJI	East Asia & Pacific	Official bilateral	China	China (Official bilateral)	201826	5.49625e+06	0.0367207
Fiji	FJI	East Asia & Pacific	Official bilateral	India	India (Official bilateral)	32253	5.49625e+06	0.00586818
Fiji	FJI	East Asia & Pacific	Official bilateral	Japan	Japan (Official bilateral)	3895	5.49625e+06	0.000708665
Fiji	FJI	East Asia & Pacific	Official multilateral	Asian Dev. Bank	Asian Dev. Bank (Official multilateral)	185580	5.49625e+06	0.0337648
Fiji	FJI	East Asia & Pacific	Official multilateral	International Monetary Fund	International Monetary Fund (Official multilateral)	92779	5.49625e+06	0.0168804
Fiji	FJI	East Asia & Pacific	Official multilateral	World Bank-IBRD	World Bank-IBRD (Official multilateral)	76205	5.49625e+06	0.0138649
Fiji	FJI	East Asia & Pacific	Official multilateral	Other multilateral	Other multilateral (Official multilateral)	1180	5.49625e+06	0.000214692
Fiji	FJI	East Asia & Pacific	Total		(Total)	793718	5.49625e+06	0.144411
Fiji	FJI	East Asia & Pacific	Total Bondholders		(Total Bondholders)	200000	5.49625e+06	0.0363884
Fiji	FJI	East Asia & Pacific	Total Official bilateral		(Total Official bilateral)	237974	5.49625e+06	0.0432975
Fiji	FJI	East Asia & Pacific	Total Official multilateral		(Total Official multilateral)	355744	5.49625e+06	0.0647248
Gambia, The	GMB	Sub-Saharan Africa	Official bilateral	Austria	Austria (Official bilateral)	662	1.82607e+06	0.000362526
Gambia, The	GMB	Sub-Saharan Africa	Official bilateral	Belgium	Belgium (Official bilateral)	504	1.82607e+06	0.000276002
Gambia, The	GMB	Sub-Saharan Africa	Official bilateral	India	India (Official bilateral)	23407	1.82607e+06	0.0128182
Gambia, The	GMB	Sub-Saharan Africa	Official bilateral	Kuwait	Kuwait (Official bilateral)	51302	1.82607e+06	0.0280942
Gambia, The	GMB	Sub-Saharan Africa	Official bilateral	Libya	Libya (Official bilateral)	3950	1.82607e+06	0.00216311
Gambia, The	GMB	Sub-Saharan Africa	Official bilateral	Saudi Arabia	Saudi Arabia (Official bilateral)	55603	1.82607e+06	0.0304495
Gambia, The	GMB	Sub-Saharan Africa	Official bilateral	United Arab Emirates	United Arab Emirates (Official bilateral)	17000	1.82607e+06	0.00930959
Gambia, The	GMB	Sub-Saharan Africa	Official bilateral	Other Bilateral		13155	1.82607e+06	0.00720398
Gambia, The	GMB	Sub-Saharan Africa	Official multilateral	African Dev. Bank	African Dev. Bank (Official multilateral)	57091	1.82607e+06	0.0312643
Gambia, The	GMB	Sub-Saharan Africa	Official multilateral	International Monetary Fund	International Monetary Fund (Official multilateral)	77242	1.82607e+06	0.0422995
Gambia, The	GMB	Sub-Saharan Africa	Official multilateral	Other multilateral	Other multilateral (Official multilateral)	276299	1.82607e+06	0.151308
Gambia, The	GMB	Sub-Saharan Africa	Official multilateral	World Bank-IDA	World Bank-IDA (Official multilateral)	117666	1.82607e+06	0.0644366
Gambia, The	GMB	Sub-Saharan Africa	Total		(Total)	693881	1.82607e+06	0.379985
Gambia, The	GMB	Sub-Saharan Africa	Total Official bilateral		(Total Official bilateral)	165583	1.82607e+06	0.0906771
Gambia, The	GMB	Sub-Saharan Africa	Total Official multilateral		(Total Official multilateral)	528298	1.82607e+06	0.289308
Ghana	GHA	Sub-Saharan Africa	Bondholders	Bond market	Bond market (Bondholders)	8047979	6.69836e+07	0.120148
Ghana	GHA	Sub-Saharan Africa	Non-official	Austria	Austria (Non-official)	176611	6.69836e+07	0.00263663
Ghana	GHA	Sub-Saharan Africa	Non-official	Belgium	Belgium (Non-official)	54593	6.69836e+07	0.00081502
Ghana	GHA	Sub-Saharan Africa	Non-official	Brazil	Brazil (Non-official)	163983	6.69836e+07	0.00244811
Ghana	GHA	Sub-Saharan Africa	Non-official	China	China (Non-official)	234522	6.69836e+07	0.00350118
Ghana	GHA	Sub-Saharan Africa	Non-official	France	France (Non-official)	386099	6.69836e+07	0.00576408
Ghana	GHA	Sub-Saharan Africa	Non-official	Germany	Germany (Non-official)	6063	6.69836e+07	9.05146e-05
Ghana	GHA	Sub-Saharan Africa	Non-official	Israel	Israel (Non-official)	183771	6.69836e+07	0.00274352
Ghana	GHA	Sub-Saharan Africa	Non-official	Italy	Italy (Non-official)	39938	6.69836e+07	0.000596235
Ghana	GHA	Sub-Saharan Africa	Non-official	Korea, Republic Of	Korea, Republic Of (Non-official)	1154431	6.69836e+07	0.0172345
Ghana	GHA	Sub-Saharan Africa	Non-official	Mauritius	Mauritius (Non-official)	47317	6.69836e+07	0.000706396
Ghana	GHA	Sub-Saharan Africa	Non-official	Multiple lenders	Multiple lenders (Non-official)	59638	6.69836e+07	0.000890337
Ghana	GHA	Sub-Saharan Africa	Non-official	Netherlands	Netherlands (Non-official)	255404	6.69836e+07	0.00381293
Ghana	GHA	Sub-Saharan Africa	Non-official	Spain	Spain (Non-official)	41617	6.69836e+07	0.000621301
Ghana	GHA	Sub-Saharan Africa	Non-official	Sweden	Sweden (Non-official)	19456	6.69836e+07	0.000290459
Ghana	GHA	Sub-Saharan Africa	Non-official	Switzerland	Switzerland (Non-official)	27280	6.69836e+07	0.000407264
Ghana	GHA	Sub-Saharan Africa	Non-official	United Kingdom	United Kingdom (Non-official)	471544	6.69836e+07	0.00703969
Ghana	GHA	Sub-Saharan Africa	Non-official	United States	United States (Non-official)	414988	6.69836e+07	0.00619536
Ghana	GHA	Sub-Saharan Africa	Official bilateral	Austria	Austria (Official bilateral)	3064	6.69836e+07	4.57425e-05
Ghana	GHA	Sub-Saharan Africa	Official bilateral	Belgium	Belgium (Official bilateral)	23198	6.69836e+07	0.000346323
Ghana	GHA	Sub-Saharan Africa	Official bilateral	Brazil	Brazil (Official bilateral)	6115	6.69836e+07	9.1291e-05
Ghana	GHA	Sub-Saharan Africa	Official bilateral	China	China (Official bilateral)	1589491	6.69836e+07	0.0237295
Ghana	GHA	Sub-Saharan Africa	Official bilateral	Egypt	Egypt (Official bilateral)	291891	6.69836e+07	0.00435765
Ghana	GHA	Sub-Saharan Africa	Official bilateral	France	France (Official bilateral)	279591	6.69836e+07	0.00417402
Ghana	GHA	Sub-Saharan Africa	Official bilateral	Germany	Germany (Official bilateral)	231092	6.69836e+07	0.00344998
Ghana	GHA	Sub-Saharan Africa	Official bilateral	India	India (Official bilateral)	244558	6.69836e+07	0.00365101
Ghana	GHA	Sub-Saharan Africa	Official bilateral	Italy	Italy (Official bilateral)	22421	6.69836e+07	0.000334724
Ghana	GHA	Sub-Saharan Africa	Official bilateral	Kuwait	Kuwait (Official bilateral)	49026	6.69836e+07	0.00073191
Ghana	GHA	Sub-Saharan Africa	Official bilateral	Nigeria	Nigeria (Official bilateral)	1060	6.69836e+07	1.58248e-05
Ghana	GHA	Sub-Saharan Africa	Official bilateral	Other bilateral	Other bilateral (Official bilateral)	101060	6.69836e+07	0.00150873
Ghana	GHA	Sub-Saharan Africa	Official bilateral	Saudi Arabia	Saudi Arabia (Official bilateral)	18337	6.69836e+07	0.000273753
Ghana	GHA	Sub-Saharan Africa	Official bilateral	Spain	Spain (Official bilateral)	25920	6.69836e+07	0.00038696
Ghana	GHA	Sub-Saharan Africa	Official bilateral	Sweden	Sweden (Official bilateral)	95	6.69836e+07	1.41826e-06
Ghana	GHA	Sub-Saharan Africa	Official bilateral	Turkey	Turkey (Official bilateral)	93766	6.69836e+07	0.00139983
Ghana	GHA	Sub-Saharan Africa	Official bilateral	United States	United States (Official bilateral)	243978	6.69836e+07	0.00364235
Ghana	GHA	Sub-Saharan Africa	Official multilateral	African Dev. Bank	African Dev. Bank (Official multilateral)	1159104	6.69836e+07	0.0173043
Ghana	GHA	Sub-Saharan Africa	Official multilateral	International Monetary Fund	International Monetary Fund (Official multilateral)	1575604	6.69836e+07	0.0235222
Ghana	GHA	Sub-Saharan Africa	Official multilateral	Other multilateral	Other multilateral (Official multilateral)	333032	6.69836e+07	0.00497184
Ghana	GHA	Sub-Saharan Africa	Official multilateral	World Bank-IDA	World Bank-IDA (Official multilateral)	3989482	6.69836e+07	0.0595591
Ghana	GHA	Sub-Saharan Africa	Total		(Total)	22067119	6.69836e+07	0.32944
Ghana	GHA	Sub-Saharan Africa	Total Bondholders		(Total Bondholders)	8047979	6.69836e+07	0.120148
Ghana	GHA	Sub-Saharan Africa	Total Non-official		(Total Non-official)	3737255	6.69836e+07	0.0557936
Ghana	GHA	Sub-Saharan Africa	Total Official bilateral		(Total Official bilateral)	3224664	6.69836e+07	0.0481411
Ghana	GHA	Sub-Saharan Africa	Total Official multilateral		(Total Official multilateral)	7057221	6.69836e+07	0.105357
Grenada	GRD	Latin America & Caribbean	Bondholders	Bond market	Bond market (Bondholders)	99355	1.2106e+06	0.0820706
Grenada	GRD	Latin America & Caribbean	Non-official	Italy	Italy (Non-official)	1387	1.2106e+06	0.00114571
Grenada	GRD	Latin America & Caribbean	Non-official	United States	United States (Non-official)	337	1.2106e+06	0.000278374
Grenada	GRD	Latin America & Caribbean	Official bilateral	Austria	Austria (Official bilateral)	2705	1.2106e+06	0.00223442
Grenada	GRD	Latin America & Caribbean	Official bilateral	China	China (Official bilateral)	41321	1.2106e+06	0.0341326
Grenada	GRD	Latin America & Caribbean	Official bilateral	France	France (Official bilateral)	3071	1.2106e+06	0.00253675
Grenada	GRD	Latin America & Caribbean	Official bilateral	Germany	Germany (Official bilateral)	3395	1.2106e+06	0.00280439
Grenada	GRD	Latin America & Caribbean	Official bilateral	Kuwait	Kuwait (Official bilateral)	12404	1.2106e+06	0.0102461
Grenada	GRD	Latin America & Caribbean	Official bilateral	Libya	Libya (Official bilateral)	5000	1.2106e+06	0.00413017
Grenada	GRD	Latin America & Caribbean	Official bilateral	Other bilateral	Other bilateral (Official bilateral)	50195	1.2106e+06	0.0414628
Grenada	GRD	Latin America & Caribbean	Official bilateral	United Kingdom	United Kingdom (Official bilateral)	1334	1.2106e+06	0.00110193
Grenada	GRD	Latin America & Caribbean	Official bilateral	United States	United States (Official bilateral)	1526	1.2106e+06	0.00126053
Grenada	GRD	Latin America & Caribbean	Official bilateral	Venezuela, RB	Venezuela, RB (Official bilateral)	5297	1.2106e+06	0.0043755
Grenada	GRD	Latin America & Caribbean	Official multilateral	International Monetary Fund	International Monetary Fund (Official multilateral)	35609	1.2106e+06	0.0294143
Grenada	GRD	Latin America & Caribbean	Official multilateral	Other multilateral	Other multilateral (Official multilateral)	142246	1.2106e+06	0.1175
Grenada	GRD	Latin America & Caribbean	Official multilateral	World Bank-IBRD	World Bank-IBRD (Official multilateral)	8618	1.2106e+06	0.00711876
Grenada	GRD	Latin America & Caribbean	Official multilateral	World Bank-IDA	World Bank-IDA (Official multilateral)	122773	1.2106e+06	0.101415
Grenada	GRD	Latin America & Caribbean	Total		(Total)	536574	1.2106e+06	0.443228
Grenada	GRD	Latin America & Caribbean	Total Bondholders		(Total Bondholders)	99355	1.2106e+06	0.0820706
Grenada	GRD	Latin America & Caribbean	Total Non-official		(Total Non-official)	1724	1.2106e+06	0.00142408
Grenada	GRD	Latin America & Caribbean	Total Official bilateral		(Total Official bilateral)	126249	1.2106e+06	0.104286
Grenada	GRD	Latin America & Caribbean	Total Official multilateral		(Total Official multilateral)	309246	1.2106e+06	0.255448
Guinea	GIN	Sub-Saharan Africa	Non-official	China	China (Non-official)	44369	1.22967e+07	0.00360821
Guinea	GIN	Sub-Saharan Africa	Non-official	Serbia	Serbia (Non-official)	16165	1.22967e+07	0.00131458
Guinea	GIN	Sub-Saharan Africa	Non-official	United Kingdom	United Kingdom (Non-official)	2809	1.22967e+07	0.000228436
Guinea	GIN	Sub-Saharan Africa	Official bilateral	China	China (Official bilateral)	662758	1.22967e+07	0.0538974
Guinea	GIN	Sub-Saharan Africa	Official bilateral	Czech Republic		12272	1.22967e+07	0.000997994
Guinea	GIN	Sub-Saharan Africa	Official bilateral	Egypt	Egypt (Official bilateral)	4766	1.22967e+07	0.000387585
Guinea	GIN	Sub-Saharan Africa	Official bilateral	France	France (Official bilateral)	84183	1.22967e+07	0.006846
Guinea	GIN	Sub-Saharan Africa	Official bilateral	India		400	1.22967e+07	3.25291e-05
Guinea	GIN	Sub-Saharan Africa	Official bilateral	Kuwait	Kuwait (Official bilateral)	41287	1.22967e+07	0.00335758
Guinea	GIN	Sub-Saharan Africa	Official bilateral	Libya	Libya (Official bilateral)	20000	1.22967e+07	0.00162646
Guinea	GIN	Sub-Saharan Africa	Official bilateral	Multiple lenders	Multiple lenders (Official bilateral)	40710	1.22967e+07	#REF!
Guinea	GIN	Sub-Saharan Africa	Official bilateral	Other bilateral	Other bilateral (Official bilateral)	195406	1.22967e+07	0.015891
Guinea	GIN	Sub-Saharan Africa	Official bilateral	Saudi Arabia	Saudi Arabia (Official bilateral)	92181	1.22967e+07	0.00331065
Guinea	GIN	Sub-Saharan Africa	Official bilateral	Switzerland	Switzerland (Official bilateral)	6918	1.22967e+07	#REF!
Guinea	GIN	Sub-Saharan Africa	Official bilateral	Thailand	Thailand (Official bilateral)	1290	1.22967e+07	0.000562592
Guinea	GIN	Sub-Saharan Africa	Official multilateral	African Dev. Bank	African Dev. Bank (Official multilateral)	152806	1.22967e+07	0.0124266
Guinea	GIN	Sub-Saharan Africa	Official multilateral	International Monetary Fund	International Monetary Fund (Official multilateral)	481053	1.22967e+07	0.0391206
Guinea	GIN	Sub-Saharan Africa	Official multilateral	Other multilateral	Other multilateral (Official multilateral)	327912	1.22967e+07	0.0266667
Guinea	GIN	Sub-Saharan Africa	Official multilateral	World Bank-IDA	World Bank-IDA (Official multilateral)	471165	1.22967e+07	0.0383165
Guinea	GIN	Sub-Saharan Africa	Total		(Total)	2658449	1.22967e+07	0.216193
Guinea	GIN	Sub-Saharan Africa	Total Non-official		(Total Non-official)	63342	1.22967e+07	0.00515115
Guinea	GIN	Sub-Saharan Africa	Total Official bilateral		(Total Official bilateral)	1162171	1.22967e+07	0.0945111
Guinea	GIN	Sub-Saharan Africa	Total Official multilateral		(Total Official multilateral)	1432936	1.22967e+07	0.11653
Guinea-Bissau	GNB	Sub-Saharan Africa	Bondholders	Bond market	Bond market (Bondholders)	126217	1.33945e+06	0.0942305
Guinea-Bissau	GNB	Sub-Saharan Africa	Official bilateral	India	India (Official bilateral)	13889	1.33945e+06	0.0103692
Guinea-Bissau	GNB	Sub-Saharan Africa	Official bilateral	Kuwait	Kuwait (Official bilateral)	24639	1.33945e+06	0.0183949
Guinea-Bissau	GNB	Sub-Saharan Africa	Official bilateral	Libya	Libya (Official bilateral)	9514	1.33945e+06	0.00710292
Guinea-Bissau	GNB	Sub-Saharan Africa	Official bilateral	Other Bilateral	Other Bilateral (Official bilateral)	54744	1.33945e+06	0.0408705
Guinea-Bissau	GNB	Sub-Saharan Africa	Official bilateral	Saudi Arabia	Saudi Arabia (Official bilateral)	17229	1.33945e+06	0.0128628
Guinea-Bissau	GNB	Sub-Saharan Africa	Official bilateral	United Arab Emirates	United Arab Emirates (Official bilateral)	1892	1.33945e+06	0.00141252
Guinea-Bissau	GNB	Sub-Saharan Africa	Official multilateral	African Dev. Bank	African Dev. Bank (Official multilateral)	29389	1.33945e+06	0.0219411
Guinea-Bissau	GNB	Sub-Saharan Africa	Official multilateral	International Monetary Fund	International Monetary Fund (Official multilateral)	50291	1.33945e+06	0.037546
Guinea-Bissau	GNB	Sub-Saharan Africa	Official multilateral	Other Multilaterals	Other Multilaterals (Official multilateral)	103345	1.33945e+06	0.0771549
Guinea-Bissau	GNB	Sub-Saharan Africa	Official multilateral	World Bank-IDA	World Bank-IDA (Official multilateral)	126124	1.33945e+06	0.0941611
Guinea-Bissau	GNB	Sub-Saharan Africa	Total		(Total)	557274	1.33945e+06	0.416047
Guinea-Bissau	GNB	Sub-Saharan Africa	Total Bondholders		(Total Bondholders)	126217	1.33945e+06	0.0942305
Guinea-Bissau	GNB	Sub-Saharan Africa	Total Official bilateral		(Total Official bilateral)	121907	1.33945e+06	0.0910128
Guinea-Bissau	GNB	Sub-Saharan Africa	Total Official multilateral		(Total Official multilateral)	309149	1.33945e+06	0.230803
Guyana	GUY	Latin America & Caribbean	Bondholders	Bond market	Bond market (Bondholders)	28	5.17376e+06	5.41193e-06
Guyana	GUY	Latin America & Caribbean	Non-official	India	India (Non-official)	43	5.17376e+06	8.31117e-06
Guyana	GUY	Latin America & Caribbean	Non-official	Multiple lenders	Multiple lenders (Non-official)	191	5.17376e+06	3.69171e-05
Guyana	GUY	Latin America & Caribbean	Non-official	Trinidad and Tobago	Trinidad and Tobago (Non-official)	12539	5.17376e+06	0.00242358
Guyana	GUY	Latin America & Caribbean	Non-official	United Kingdom	United Kingdom (Non-official)	15816	5.17376e+06	0.00305696
Guyana	GUY	Latin America & Caribbean	Non-official	United States	United States (Non-official)	3450	5.17376e+06	0.000666827
Guyana	GUY	Latin America & Caribbean	Official bilateral	Argentina	Argentina (Official bilateral)	4515	5.17376e+06	0.000872673
Guyana	GUY	Latin America & Caribbean	Official bilateral	China	China (Official bilateral)	232339	5.17376e+06	0.0449072
Guyana	GUY	Latin America & Caribbean	Official bilateral	India	India (Official bilateral)	14470	5.17376e+06	0.00279681
Guyana	GUY	Latin America & Caribbean	Official bilateral	Italy	Italy (Official bilateral)	2551	5.17376e+06	0.000493065
Guyana	GUY	Latin America & Caribbean	Official bilateral	Kuwait	Kuwait (Official bilateral)	20631	5.17376e+06	0.00398762
Guyana	GUY	Latin America & Caribbean	Official bilateral	Libya	Libya (Official bilateral)	15000	5.17376e+06	0.00289925
Guyana	GUY	Latin America & Caribbean	Official bilateral	Other bilateral	Other bilateral (Official bilateral)	588	5.17376e+06	0.00011365
Guyana	GUY	Latin America & Caribbean	Official bilateral	United Arab Emirates	United Arab Emirates (Official bilateral)	3241	5.17376e+06	0.00062643
Guyana	GUY	Latin America & Caribbean	Official bilateral	United Kingdom	United Kingdom (Official bilateral)	92	5.17376e+06	1.7782e-05
Guyana	GUY	Latin America & Caribbean	Official bilateral	United States	United States (Official bilateral)	481	5.17376e+06	9.29691e-05
Guyana	GUY	Latin America & Caribbean	Official bilateral	Venezuela, RB	Venezuela, RB (Official bilateral)	109744	5.17376e+06	0.0212117
Guyana	GUY	Latin America & Caribbean	Official multilateral	Inter-American Dev. Bank	Inter-American Dev. Bank (Official multilateral)	546180	5.17376e+06	0.105567
Guyana	GUY	Latin America & Caribbean	Official multilateral	International Monetary Fund	International Monetary Fund (Official multilateral)	120423	5.17376e+06	0.0232757
Guyana	GUY	Latin America & Caribbean	Official multilateral	Other multilateral	Other multilateral (Official multilateral)	186149	5.17376e+06	0.0359794
Guyana	GUY	Latin America & Caribbean	Official multilateral	World Bank-IDA	World Bank-IDA (Official multilateral)	82971	5.17376e+06	0.0160369
Guyana	GUY	Latin America & Caribbean	Total		(Total)	1371442	5.17376e+06	0.265076
Guyana	GUY	Latin America & Caribbean	Total Bondholders		(Total Bondholders)	28	5.17376e+06	5.41193e-06
Guyana	GUY	Latin America & Caribbean	Total Non-official		(Total Non-official)	32039	5.17376e+06	0.0061926
Guyana	GUY	Latin America & Caribbean	Total Official bilateral		(Total Official bilateral)	403653	5.17376e+06	0.0780193
Guyana	GUY	Latin America & Caribbean	Total Official multilateral		(Total Official multilateral)	935723	5.17376e+06	0.180859
Haiti	HTI	Latin America & Caribbean	Official bilateral	Venezuela, Republic Bolivarian	Venezuela, Republic Bolivarian (Official bilateral)	1839357	1.43322e+07	0.128338
Haiti	HTI	Latin America & Caribbean	Official bilateral	Other Bilateral	Other Bilateral (Official bilateral)	27234	1.43322e+07	0.0019002
Haiti	HTI	Latin America & Caribbean	Official bilateral	Multiple Lenders	Multiple Lenders (Official bilateral)	4915	1.43322e+07	0.000342935
Haiti	HTI	Latin America & Caribbean	Official multilateral	International Monetary Fund	International Monetary Fund (Official multilateral)	185491	1.43322e+07	0.0129423
Haiti	HTI	Latin America & Caribbean	Official multilateral	Other Multilaterals	Other Multilaterals (Official multilateral)	95858	1.43322e+07	0.00668831
Haiti	HTI	Latin America & Caribbean	Official multilateral	Inter-American Dev. Bank	Inter-American Dev. Bank (Official multilateral)	500	1.43322e+07	3.48866e-05
Haiti	HTI	Latin America & Caribbean	Non-official	Other Non-official		44185	1.43322e+07	0.00308293
Haiti	HTI	Latin America & Caribbean	Total		(Total)	2197540	1.43322e+07	0.153329
Haiti	HTI	Latin America & Caribbean	Total Non-official		(Total Non-official)	44185	1.43322e+07	0.00308293
Haiti	HTI	Latin America & Caribbean	Total Official bilateral		(Total Official bilateral)	1871506	1.43322e+07	0.130581
Haiti	HTI	Latin America & Caribbean	Total Official multilateral		(Total Official multilateral)	281849	1.43322e+07	0.0196655
Honduras	HND	Latin America & Caribbean	Bondholders	Bond market	Bond market (Bondholders)	1700000	2.50954e+07	0.0677415
Honduras	HND	Latin America & Caribbean	Non-official	Austria	Austria (Non-official)	70095	2.50954e+07	0.00279314
Honduras	HND	Latin America & Caribbean	Non-official	Belgium	Belgium (Non-official)	4005	2.50954e+07	0.000159591
Honduras	HND	Latin America & Caribbean	Non-official	China	China (Non-official)	296770	2.50954e+07	0.0118257
Honduras	HND	Latin America & Caribbean	Non-official	France	France (Non-official)	233	2.50954e+07	9.28457e-06
Honduras	HND	Latin America & Caribbean	Non-official	Italy	Italy (Non-official)	17257	2.50954e+07	0.000687656
Honduras	HND	Latin America & Caribbean	Non-official	Netherlands	Netherlands (Non-official)	26836	2.50954e+07	0.00106936
Honduras	HND	Latin America & Caribbean	Non-official	United States	United States (Non-official)	29735	2.50954e+07	0.00118488
Honduras	HND	Latin America & Caribbean	Non-official	Other Non-official		11110	2.50954e+07	0.000442711
Honduras	HND	Latin America & Caribbean	Official bilateral	Brazil	Brazil (Official bilateral)	47010	2.50954e+07	0.00187325
Honduras	HND	Latin America & Caribbean	Official bilateral	China	China (Official bilateral)	170004	2.50954e+07	0.00677431
Honduras	HND	Latin America & Caribbean	Official bilateral	France	France (Official bilateral)	7285	2.50954e+07	0.000290292
Honduras	HND	Latin America & Caribbean	Official bilateral	Germany, Fed.Rep. Of	Germany, Fed.Rep. Of (Official bilateral)	54434	2.50954e+07	0.00216908
Honduras	HND	Latin America & Caribbean	Official bilateral	India	India (Official bilateral)	21939	2.50954e+07	0.000874224
Honduras	HND	Latin America & Caribbean	Official bilateral	Italy	Italy (Official bilateral)	70096	2.50954e+07	0.00279318
Honduras	HND	Latin America & Caribbean	Official bilateral	Japan	Japan (Official bilateral)	2053	2.50954e+07	8.18078e-05
Honduras	HND	Latin America & Caribbean	Official bilateral	Kuwait	Kuwait (Official bilateral)	42052	2.50954e+07	0.00167569
Honduras	HND	Latin America & Caribbean	Official bilateral	Other Bilateral	Other Bilateral (Official bilateral)	407723	2.50954e+07	0.0162469
Honduras	HND	Latin America & Caribbean	Official bilateral	Spain	Spain (Official bilateral)	85340	2.50954e+07	0.00340062
Honduras	HND	Latin America & Caribbean	Official bilateral	Switzerland	Switzerland (Official bilateral)	1938	2.50954e+07	7.72253e-05
Honduras	HND	Latin America & Caribbean	Official bilateral	United States	United States (Official bilateral)	1656	2.50954e+07	6.59882e-05
Honduras	HND	Latin America & Caribbean	Official bilateral	Venezuela, Republic Bolivarian	Venezuela, Republic Bolivarian (Official bilateral)	144254	2.50954e+07	0.00574823
Honduras	HND	Latin America & Caribbean	Official multilateral	Inter-American Dev. Bank	Inter-American Dev. Bank (Official multilateral)	2325970	2.50954e+07	0.0926851
Honduras	HND	Latin America & Caribbean	Official multilateral	International Monetary Fund	International Monetary Fund (Official multilateral)	171263	2.50954e+07	0.00682448
Honduras	HND	Latin America & Caribbean	Official multilateral	Other Multilaterals	Other Multilaterals (Official multilateral)	1329699	2.50954e+07	0.0529858
Honduras	HND	Latin America & Caribbean	Official multilateral	World Bank-IDA	World Bank-IDA (Official multilateral)	908491	2.50954e+07	0.0362015
Honduras	HND	Latin America & Caribbean	Total		(Total)	7947248	2.50954e+07	0.316682
Honduras	HND	Latin America & Caribbean	Total Bondholders		(Total Bondholders)	1700000	2.50954e+07	0.0677415
Honduras	HND	Latin America & Caribbean	Total Non-official		(Total Non-official)	456041	2.50954e+07	0.0181723
Honduras	HND	Latin America & Caribbean	Total Official bilateral		(Total Official bilateral)	1055784	2.50954e+07	0.0420708
Honduras	HND	Latin America & Caribbean	Total Official multilateral		(Total Official multilateral)	4735423	2.50954e+07	0.188697
Kenya	KEN	Sub-Saharan Africa	Bondholders	Bond market	Bond market (Bondholders)	6100000	9.55031e+07	0.0638723
Kenya	KEN	Sub-Saharan Africa	Non-official	Austria	Austria (Non-official)	15331	9.55031e+07	0.000160529
Kenya	KEN	Sub-Saharan Africa	Non-official	Belgium	Belgium (Non-official)	82608	9.55031e+07	0.000864977
Kenya	KEN	Sub-Saharan Africa	Non-official	France	France (Non-official)	12181	9.55031e+07	0.000127546
Kenya	KEN	Sub-Saharan Africa	Non-official	Germany	Germany (Non-official)	55477	9.55031e+07	0.000580892
Kenya	KEN	Sub-Saharan Africa	Non-official	Israel	Israel (Non-official)	38011	9.55031e+07	0.000398008
Kenya	KEN	Sub-Saharan Africa	Non-official	Italy	Italy (Non-official)	626416	9.55031e+07	0.00655912
Kenya	KEN	Sub-Saharan Africa	Non-official	Spain	Spain (Non-official)	20548	9.55031e+07	0.000215155
Kenya	KEN	Sub-Saharan Africa	Non-official	Switzerland	Switzerland (Non-official)	72637	9.55031e+07	0.000760572
Kenya	KEN	Sub-Saharan Africa	Non-official	United Kingdom	United Kingdom (Non-official)	78074	9.55031e+07	0.000817502
Kenya	KEN	Sub-Saharan Africa	Official bilateral	Austria	Austria (Official bilateral)	3370	9.55031e+07	3.52868e-05
Kenya	KEN	Sub-Saharan Africa	Official bilateral	Belgium	Belgium (Official bilateral)	28685	9.55031e+07	0.000300357
Kenya	KEN	Sub-Saharan Africa	Official bilateral	Canada	Canada (Official bilateral)	576	9.55031e+07	6.03122e-06
Kenya	KEN	Sub-Saharan Africa	Official bilateral	China	China (Official bilateral)	7493449	9.55031e+07	0.0784629
Kenya	KEN	Sub-Saharan Africa	Official bilateral	Denmark		6414	9.55031e+07	6.71601e-05
Kenya	KEN	Sub-Saharan Africa	Official bilateral	Finland		14682	9.55031e+07	0.000153733
Kenya	KEN	Sub-Saharan Africa	Official bilateral	France	France (Official bilateral)	752566	9.55031e+07	0.00788002
Kenya	KEN	Sub-Saharan Africa	Official bilateral	Germany	Germany (Official bilateral)	321520	9.55031e+07	0.00336659
Kenya	KEN	Sub-Saharan Africa	Official bilateral	India	India (Official bilateral)	74488	9.55031e+07	0.000779954
Kenya	KEN	Sub-Saharan Africa	Official bilateral	Italy	Italy (Official bilateral)	5341	9.55031e+07	5.59249e-05
Kenya	KEN	Sub-Saharan Africa	Official bilateral	Japan	Japan (Official bilateral)	1371133	9.55031e+07	0.0143569
Kenya	KEN	Sub-Saharan Africa	Official bilateral	Kuwait	Kuwait (Official bilateral)	14156	9.55031e+07	0.000148226
Kenya	KEN	Sub-Saharan Africa	Official bilateral	Netherlands	Netherlands (Official bilateral)	1738	9.55031e+07	1.81984e-05
Kenya	KEN	Sub-Saharan Africa	Official bilateral	Other bilateral	Other bilateral (Official bilateral)	10352	9.55031e+07	0.000108394
Kenya	KEN	Sub-Saharan Africa	Official bilateral	Saudi Arabia	Saudi Arabia (Official bilateral)	22690	9.55031e+07	0.000237584
Kenya	KEN	Sub-Saharan Africa	Official bilateral	Spain	Spain (Official bilateral)	109691	9.55031e+07	0.00114856
Kenya	KEN	Sub-Saharan Africa	Official bilateral	United Arab Emirates	United Arab Emirates (Official bilateral)	3092	9.55031e+07	3.23759e-05
Kenya	KEN	Sub-Saharan Africa	Official bilateral	United Kingdom	United Kingdom (Official bilateral)	321	9.55031e+07	3.36115e-06
Kenya	KEN	Sub-Saharan Africa	Official bilateral	United States	United States (Official bilateral)	17448	9.55031e+07	0.000182696
Kenya	KEN	Sub-Saharan Africa	Official multilateral	African Dev. Bank	African Dev. Bank (Official multilateral)	2422994	9.55031e+07	0.0253708
Kenya	KEN	Sub-Saharan Africa	Official multilateral	International Monetary Fund	International Monetary Fund (Official multilateral)	719708	9.55031e+07	0.00753597
Kenya	KEN	Sub-Saharan Africa	Official multilateral	Other multilateral	Other multilateral (Official multilateral)	3168108	9.55031e+07	0.0331728
Kenya	KEN	Sub-Saharan Africa	Official multilateral	World Bank-IDA	World Bank-IDA (Official multilateral)	7124964	9.55031e+07	0.0746045
Kenya	KEN	Sub-Saharan Africa	Total		(Total)	30788770	9.55031e+07	0.322385
Kenya	KEN	Sub-Saharan Africa	Total Bondholders		(Total Bondholders)	6100000	9.55031e+07	0.0638723
Kenya	KEN	Sub-Saharan Africa	Total Non-official		(Total Non-official)	1001284	9.55031e+07	0.0104843
Kenya	KEN	Sub-Saharan Africa	Total Official bilateral		(Total Official bilateral)	10251712	9.55031e+07	0.107344
Kenya	KEN	Sub-Saharan Africa	Total Official multilateral		(Total Official multilateral)	13435774	9.55031e+07	0.140684
Kyrgyz Republic	KGZ	Europe & Central Asia	Official bilateral	China	China (Official bilateral)	1778506	8.45462e+06	0.210359
Kyrgyz Republic	KGZ	Europe & Central Asia	Official bilateral	Denmark		2770	8.45462e+06	0.000327632
Kyrgyz Republic	KGZ	Europe & Central Asia	Official bilateral	France	France (Official bilateral)	4704	8.45462e+06	0.000556382
Kyrgyz Republic	KGZ	Europe & Central Asia	Official bilateral	Germany	Germany (Official bilateral)	82280	8.45462e+06	0.00973196
Kyrgyz Republic	KGZ	Europe & Central Asia	Official bilateral	Japan	Japan (Official bilateral)	239205	8.45462e+06	0.0282928
Kyrgyz Republic	KGZ	Europe & Central Asia	Official bilateral	Kuwait	Kuwait (Official bilateral)	10457	8.45462e+06	0.00123684
Kyrgyz Republic	KGZ	Europe & Central Asia	Official bilateral	Other bilateral	Other bilateral (Official bilateral)	14853	8.45462e+06	0.00175679
Kyrgyz Republic	KGZ	Europe & Central Asia	Official bilateral	Saudi Arabia	Saudi Arabia (Official bilateral)	19480	8.45462e+06	0.00230407
Kyrgyz Republic	KGZ	Europe & Central Asia	Official bilateral	Turkey	Turkey (Official bilateral)	93269	8.45462e+06	0.0110317
Kyrgyz Republic	KGZ	Europe & Central Asia	Official bilateral	United Arab Emirates	United Arab Emirates (Official bilateral)	10108	8.45462e+06	0.00119556
Kyrgyz Republic	KGZ	Europe & Central Asia	Official multilateral	Asian Dev. Bank	Asian Dev. Bank (Official multilateral)	566464	8.45462e+06	0.0670005
Kyrgyz Republic	KGZ	Europe & Central Asia	Official multilateral	International Monetary Fund	International Monetary Fund (Official multilateral)	257513	8.45462e+06	0.0304583
Kyrgyz Republic	KGZ	Europe & Central Asia	Official multilateral	Other multilateral	Other multilateral (Official multilateral)	240551	8.45462e+06	0.028452
Kyrgyz Republic	KGZ	Europe & Central Asia	Official multilateral	World Bank-IDA	World Bank-IDA (Official multilateral)	657031	8.45462e+06	0.0777127
Kyrgyz Republic	KGZ	Europe & Central Asia	Total		(Total)	3977190	8.45462e+06	0.470416
Kyrgyz Republic	KGZ	Europe & Central Asia	Total Official bilateral		(Total Official bilateral)	2255631	8.45462e+06	0.266793
Kyrgyz Republic	KGZ	Europe & Central Asia	Total Official multilateral		(Total Official multilateral)	1721559	8.45462e+06	0.203623
Lao PDR	LAO	East Asia & Pacific	Bondholders	Bond market	Bond market (Bondholders)	1671298	1.81738e+07	0.0919617
Lao PDR	LAO	East Asia & Pacific	Non-official	Austria	Austria (Non-official)	133346	1.81738e+07	0.00733725
Lao PDR	LAO	East Asia & Pacific	Non-official	China	China (Non-official)	79846	1.81738e+07	0.00439346
Lao PDR	LAO	East Asia & Pacific	Non-official	Japan	Japan (Non-official)	49625	1.81738e+07	0.00273057
Lao PDR	LAO	East Asia & Pacific	Official bilateral	China	China (Official bilateral)	5172147	1.81738e+07	0.284593
Lao PDR	LAO	East Asia & Pacific	Official bilateral	Hungary	Hungary (Official bilateral)	75357	1.81738e+07	0.00414645
Lao PDR	LAO	East Asia & Pacific	Official bilateral	India	India (Official bilateral)	71738	1.81738e+07	0.00394732
Lao PDR	LAO	East Asia & Pacific	Official bilateral	Japan	Japan (Official bilateral)	159685	1.81738e+07	0.00878653
Lao PDR	LAO	East Asia & Pacific	Official bilateral	Kuwait	Kuwait (Official bilateral)	18245	1.81738e+07	0.00100392
Lao PDR	LAO	East Asia & Pacific	Official bilateral	Malaysia		43500	1.81738e+07	0.00239355
Lao PDR	LAO	East Asia & Pacific	Official bilateral	Other bilateral	Other bilateral (Official bilateral)	170287	1.81738e+07	0.0093699
Lao PDR	LAO	East Asia & Pacific	Official bilateral	Sweden	Sweden (Official bilateral)	6124	1.81738e+07	0.000336968
Lao PDR	LAO	East Asia & Pacific	Official bilateral	Thailand	Thailand (Official bilateral)	690198	1.81738e+07	0.0379776
Lao PDR	LAO	East Asia & Pacific	Official bilateral	Russian Federation		286779	1.81738e+07	0.0157798
Lao PDR	LAO	East Asia & Pacific	Official multilateral	Asian Dev. Bank	Asian Dev. Bank (Official multilateral)	883304	1.81738e+07	0.048603
Lao PDR	LAO	East Asia & Pacific	Official multilateral	International Monetary Fund	International Monetary Fund (Official multilateral)	70079	1.81738e+07	0.00385604
Lao PDR	LAO	East Asia & Pacific	Official multilateral	Other multilateral	Other multilateral (Official multilateral)	158644	1.81738e+07	0.00872925
Lao PDR	LAO	East Asia & Pacific	Official multilateral	World Bank-IDA	World Bank-IDA (Official multilateral)	658619	1.81738e+07	0.0362399
Lao PDR	LAO	East Asia & Pacific	Total		(Total)	10398820	1.81738e+07	0.572186
Lao PDR	LAO	East Asia & Pacific	Total Bondholders		(Total Bondholders)	1671298	1.81738e+07	0.0919617
Lao PDR	LAO	East Asia & Pacific	Total Non-official		(Total Non-official)	262817	1.81738e+07	0.0144613
Lao PDR	LAO	East Asia & Pacific	Total Official bilateral		(Total Official bilateral)	6694059	1.81738e+07	0.368335
Lao PDR	LAO	East Asia & Pacific	Total Official multilateral		(Total Official multilateral)	1770646	1.81738e+07	0.0974283
Lesotho	LSO	Sub-Saharan Africa	Non-official	France	France (Non-official)	2922	2.37633e+06	0.00122963
Lesotho	LSO	Sub-Saharan Africa	Official bilateral	China	China (Official bilateral)	71542	2.37633e+06	0.0301061
Lesotho	LSO	Sub-Saharan Africa	Official bilateral	Kuwait	Kuwait (Official bilateral)	22937	2.37633e+06	0.00965228
Lesotho	LSO	Sub-Saharan Africa	Official bilateral	Saudi Arabia	Saudi Arabia (Official bilateral)	19376	2.37633e+06	0.00815375
Lesotho	LSO	Sub-Saharan Africa	Official bilateral	United Arab Emirates	United Arab Emirates (Official bilateral)	13127	2.37633e+06	0.00552407
Lesotho	LSO	Sub-Saharan Africa	Official bilateral	India	India (Official bilateral)	3798	2.37633e+06	0.00159826
Lesotho	LSO	Sub-Saharan Africa	Official bilateral	France	France (Official bilateral)	876	2.37633e+06	0.000368636
Lesotho	LSO	Sub-Saharan Africa	Official multilateral	World Bank-IDA	World Bank-IDA (Official multilateral)	362837	2.37633e+06	0.152688
Lesotho	LSO	Sub-Saharan Africa	Official multilateral	Other multilateral	Other multilateral (Official multilateral)	192277	2.37633e+06	0.0809135
Lesotho	LSO	Sub-Saharan Africa	Official multilateral	African Dev. Bank	African Dev. Bank (Official multilateral)	166536	2.37633e+06	0.0700812
Lesotho	LSO	Sub-Saharan Africa	Official multilateral	International Monetary Fund	International Monetary Fund (Official multilateral)	79280	2.37633e+06	0.0333624
Lesotho	LSO	Sub-Saharan Africa	Total		(Total)	935508	2.37633e+06	0.393678
Lesotho	LSO	Sub-Saharan Africa	Total Non-official		(Total Non-official)	2922	2.37633e+06	0.00122963
Lesotho	LSO	Sub-Saharan Africa	Total Official bilateral		(Total Official bilateral)	131656	2.37633e+06	0.0554031
Lesotho	LSO	Sub-Saharan Africa	Total Official multilateral		(Total Official multilateral)	800930	2.37633e+06	0.337045
Liberia	LBR	Sub-Saharan Africa	Official bilateral	Other Bilateral	Other Bilateral (Official bilateral)	78596	3.07052e+06	0.025597
Liberia	LBR	Sub-Saharan Africa	Official bilateral	China	China (Official bilateral)	55261	3.07052e+06	0.0179973
Liberia	LBR	Sub-Saharan Africa	Official bilateral	Saudi Arabia	Saudi Arabia (Official bilateral)	44696	3.07052e+06	0.0145565
Liberia	LBR	Sub-Saharan Africa	Official bilateral	Kuwait	Kuwait (Official bilateral)	26279	3.07052e+06	0.00855849
Liberia	LBR	Sub-Saharan Africa	Official bilateral	India	India (Official bilateral)	1350	3.07052e+06	0.000439665
Liberia	LBR	Sub-Saharan Africa	Official multilateral	World Bank-IDA	World Bank-IDA (Official multilateral)	454936	3.07052e+06	0.148163
Liberia	LBR	Sub-Saharan Africa	Official multilateral	International Monetary Fund	International Monetary Fund (Official multilateral)	396297	3.07052e+06	0.129065
Liberia	LBR	Sub-Saharan Africa	Official multilateral	African Dev. Bank	African Dev. Bank (Official multilateral)	132657	3.07052e+06	0.0432035
Liberia	LBR	Sub-Saharan Africa	Official multilateral	Other multilateral	Other multilateral (Official multilateral)	118779	3.07052e+06	0.0386837
Liberia	LBR	Sub-Saharan Africa	Total		(Total)	1308851	3.07052e+06	0.426264
Liberia	LBR	Sub-Saharan Africa	Total Official bilateral		(Total Official bilateral)	206182	3.07052e+06	0.0671489
Liberia	LBR	Sub-Saharan Africa	Total Official multilateral		(Total Official multilateral)	1102669	3.07052e+06	0.359115
Madagascar	MDG	Sub-Saharan Africa	Non-official	Bahamas	Bahamas (Non-official)	750	1.41146e+07	5.31364e-05
Madagascar	MDG	Sub-Saharan Africa	Non-official	France	France (Non-official)	684	1.41146e+07	4.84604e-05
Madagascar	MDG	Sub-Saharan Africa	Non-official	Germany	Germany (Non-official)	88527	1.41146e+07	0.006272
Madagascar	MDG	Sub-Saharan Africa	Non-official	Ireland	Ireland (Non-official)	57435	1.41146e+07	0.00406918
Madagascar	MDG	Sub-Saharan Africa	Non-official	Netherlands	Netherlands (Non-official)	6158	1.41146e+07	0.000436285
Madagascar	MDG	Sub-Saharan Africa	Official bilateral	Belgium		67	1.41146e+07	4.74685e-06
Madagascar	MDG	Sub-Saharan Africa	Official bilateral	China	China (Official bilateral)	135429	1.41146e+07	0.00959494
Madagascar	MDG	Sub-Saharan Africa	Official bilateral	France	France (Official bilateral)	83702	1.41146e+07	0.00593016
Madagascar	MDG	Sub-Saharan Africa	Official bilateral	India	India (Official bilateral)	14516	1.41146e+07	0.00102844
Madagascar	MDG	Sub-Saharan Africa	Official bilateral	Japan	Japan (Official bilateral)	33477	1.41146e+07	0.00237179
Madagascar	MDG	Sub-Saharan Africa	Official bilateral	Kuwait	Kuwait (Official bilateral)	22010	1.41146e+07	0.00155937
Madagascar	MDG	Sub-Saharan Africa	Official bilateral	Russian Federation		53349	1.41146e+07	0.00377969
Madagascar	MDG	Sub-Saharan Africa	Official bilateral	Other bilateral	Other bilateral (Official bilateral)	113724	1.41146e+07	0.00805717
Madagascar	MDG	Sub-Saharan Africa	Official bilateral	Saudi Arabia	Saudi Arabia (Official bilateral)	17187	1.41146e+07	0.00121767
Madagascar	MDG	Sub-Saharan Africa	Official bilateral	Spain	Spain (Official bilateral)	1746	1.41146e+07	0.000123701
Madagascar	MDG	Sub-Saharan Africa	Official multilateral	African Dev. Bank	African Dev. Bank (Official multilateral)	438418	1.41146e+07	0.0310612
Madagascar	MDG	Sub-Saharan Africa	Official multilateral	International Monetary Fund	International Monetary Fund (Official multilateral)	545183	1.41146e+07	0.0386254
Madagascar	MDG	Sub-Saharan Africa	Official multilateral	Other multilateral	Other multilateral (Official multilateral)	366462	1.41146e+07	0.0259633
Madagascar	MDG	Sub-Saharan Africa	Official multilateral	World Bank-IDA	World Bank-IDA (Official multilateral)	1686384	1.41146e+07	0.119478
Madagascar	MDG	Sub-Saharan Africa	Total		(Total)	3665209	1.41146e+07	0.259674
Madagascar	MDG	Sub-Saharan Africa	Total Non-official		(Total Non-official)	153554	1.41146e+07	0.0108791
Madagascar	MDG	Sub-Saharan Africa	Total Official bilateral		(Total Official bilateral)	475207	1.41146e+07	0.0336677
Madagascar	MDG	Sub-Saharan Africa	Total Official multilateral		(Total Official multilateral)	3036447	1.41146e+07	0.215128
Malawi	MWI	Sub-Saharan Africa	Official bilateral	China	China (Official bilateral)	205022	7.6667e+06	0.0267419
Malawi	MWI	Sub-Saharan Africa	Official bilateral	India	India (Official bilateral)	143069	7.6667e+06	0.0186611
Malawi	MWI	Sub-Saharan Africa	Official bilateral	Kuwait	Kuwait (Official bilateral)	44438	7.6667e+06	0.00579623
Malawi	MWI	Sub-Saharan Africa	Official bilateral	Saudi Arabia	Saudi Arabia (Official bilateral)	27141	7.6667e+06	0.00354011
Malawi	MWI	Sub-Saharan Africa	Official bilateral	United Arab Emirates	United Arab Emirates (Official bilateral)	4136	7.6667e+06	0.000539476
Malawi	MWI	Sub-Saharan Africa	Official bilateral	Belgium	Belgium (Official bilateral)	1347	7.6667e+06	0.000175695
Malawi	MWI	Sub-Saharan Africa	Official bilateral	Other Bilateral	Other Bilateral (Official bilateral)	760	7.6667e+06	9.91299e-05
Malawi	MWI	Sub-Saharan Africa	Official multilateral	World Bank-IDA	World Bank-IDA (Official multilateral)	969287	7.6667e+06	0.126428
Malawi	MWI	Sub-Saharan Africa	Official multilateral	African Dev. Bank	African Dev. Bank (Official multilateral)	361336	7.6667e+06	0.0471306
Malawi	MWI	Sub-Saharan Africa	Official multilateral	International Monetary Fund	International Monetary Fund (Official multilateral)	339457	7.6667e+06	0.0442768
Malawi	MWI	Sub-Saharan Africa	Official multilateral	Other Multilaterals	Other Multilaterals (Official multilateral)	269612	7.6667e+06	0.0351666
Malawi	MWI	Sub-Saharan Africa	Total		(Total)	2365606	7.6667e+06	0.308556
Malawi	MWI	Sub-Saharan Africa	Total Official bilateral		(Total Official bilateral)	425913	7.6667e+06	0.0555536
Malawi	MWI	Sub-Saharan Africa	Total Official multilateral		(Total Official multilateral)	1939693	7.6667e+06	0.253002
Maldives	MDV	South Asia	Bondholders	Bond market	Bond market (Bondholders)	350000	5.64218e+06	0.0620328
Maldives	MDV	South Asia	Non-official	China	China (Non-official)	314490	5.64218e+06	0.0557391
Maldives	MDV	South Asia	Non-official	Netherlands	Netherlands (Non-official)	8388	5.64218e+06	0.00148666
Maldives	MDV	South Asia	Non-official	Singapore	Singapore (Non-official)	65100	5.64218e+06	0.0115381
Maldives	MDV	South Asia	Non-official	Sri Lanka	Sri Lanka (Non-official)	24056	5.64218e+06	0.0042636
Maldives	MDV	South Asia	Non-official	United Kingdom		19986	5.64218e+06	0.00354225
Maldives	MDV	South Asia	Official bilateral	Belgium	Belgium (Official bilateral)	2382	5.64218e+06	0.000422177
Maldives	MDV	South Asia	Official bilateral	China	China (Official bilateral)	851299	5.64218e+06	0.150881
Maldives	MDV	South Asia	Official bilateral	France	France (Official bilateral)	13363	5.64218e+06	0.00236841
Maldives	MDV	South Asia	Official bilateral	India	India (Official bilateral)	65782	5.64218e+06	0.011659
Maldives	MDV	South Asia	Official bilateral	Japan	Japan (Official bilateral)	20115	5.64218e+06	0.00356511
Maldives	MDV	South Asia	Official bilateral	Kuwait	Kuwait (Official bilateral)	27870	5.64218e+06	0.00493958
Maldives	MDV	South Asia	Official bilateral	Saudi Arabia	Saudi Arabia (Official bilateral)	72623	5.64218e+06	0.0128714
Maldives	MDV	South Asia	Official bilateral	United Arab Emirates	United Arab Emirates (Official bilateral)	8355	5.64218e+06	0.00148081
Maldives	MDV	South Asia	Official bilateral	United States	United States (Official bilateral)	580	5.64218e+06	0.000102797
Maldives	MDV	South Asia	Official multilateral	Asian Dev. Bank	Asian Dev. Bank (Official multilateral)	79724	5.64218e+06	0.01413
Maldives	MDV	South Asia	Official multilateral	International Monetary Fund	International Monetary Fund (Official multilateral)	10776	5.64218e+06	0.0019099
Maldives	MDV	South Asia	Official multilateral	Other multilateral	Other multilateral (Official multilateral)	211866	5.64218e+06	0.0375504
Maldives	MDV	South Asia	Official multilateral	World Bank-IDA	World Bank-IDA (Official multilateral)	92171	5.64218e+06	0.0163361
Maldives	MDV	South Asia	Total		(Total)	2238927	5.64218e+06	0.39682
Maldives	MDV	South Asia	Total Bondholders		(Total Bondholders)	350000	5.64218e+06	0.0620328
Maldives	MDV	South Asia	Total Non-official		(Total Non-official)	432020	5.64218e+06	0.0765697
Maldives	MDV	South Asia	Total Official bilateral		(Total Official bilateral)	1062369	5.64218e+06	0.188291
Maldives	MDV	South Asia	Total Official multilateral		(Total Official multilateral)	394538	5.64218e+06	0.0699265
Mali	MLI	Sub-Saharan Africa	Non-official	Netherlands	Netherlands (Non-official)	209	1.72796e+07	1.20952e-05
Mali	MLI	Sub-Saharan Africa	Official bilateral	Austria	Austria (Official bilateral)	5617	1.72796e+07	0.000325066
Mali	MLI	Sub-Saharan Africa	Official bilateral	Belgium	Belgium (Official bilateral)	4125	1.72796e+07	0.000238721
Mali	MLI	Sub-Saharan Africa	Official bilateral	China	China (Official bilateral)	550744	1.72796e+07	0.0318726
Mali	MLI	Sub-Saharan Africa	Official bilateral	France	France (Official bilateral)	158597	1.72796e+07	0.0091783
Mali	MLI	Sub-Saharan Africa	Official bilateral	India	India (Official bilateral)	119766	1.72796e+07	0.00693108
Mali	MLI	Sub-Saharan Africa	Official bilateral	Kuwait	Kuwait (Official bilateral)	76607	1.72796e+07	0.00443339
Mali	MLI	Sub-Saharan Africa	Official bilateral	Libya	Libya (Official bilateral)	33766	1.72796e+07	0.0019541
Mali	MLI	Sub-Saharan Africa	Official bilateral	Other bilateral	Other bilateral (Official bilateral)	33670	1.72796e+07	0.00194854
Mali	MLI	Sub-Saharan Africa	Official bilateral	Saudi Arabia	Saudi Arabia (Official bilateral)	87182	1.72796e+07	0.00504538
Mali	MLI	Sub-Saharan Africa	Official bilateral	United Arab Emirates	United Arab Emirates (Official bilateral)	28039	1.72796e+07	0.00162267
Mali	MLI	Sub-Saharan Africa	Official multilateral	African Dev. Bank	African Dev. Bank (Official multilateral)	697226	1.72796e+07	0.0403497
Mali	MLI	Sub-Saharan Africa	Official multilateral	International Monetary Fund	International Monetary Fund (Official multilateral)	446740	1.72796e+07	0.0258537
Mali	MLI	Sub-Saharan Africa	Official multilateral	Other multilateral	Other multilateral (Official multilateral)	870327	1.72796e+07	0.0503674
Mali	MLI	Sub-Saharan Africa	Official multilateral	World Bank-IDA	World Bank-IDA (Official multilateral)	1969641	1.72796e+07	0.113987
Mali	MLI	Sub-Saharan Africa	Total		(Total)	5082255	1.72796e+07	0.294119
Mali	MLI	Sub-Saharan Africa	Total Non-official		(Total Non-official)	209	1.72796e+07	1.20952e-05
Mali	MLI	Sub-Saharan Africa	Total Official bilateral		(Total Official bilateral)	1098112	1.72796e+07	0.0635497
Mali	MLI	Sub-Saharan Africa	Total Official multilateral		(Total Official multilateral)	3983934	1.72796e+07	0.230558
Mauritania	MRT	Sub-Saharan Africa	Official bilateral	Brazil	Brazil (Official bilateral)	36447	7.60066e+06	0.00479524
Mauritania	MRT	Sub-Saharan Africa	Official bilateral	China	China (Official bilateral)	322201	7.60066e+06	0.0423912
Mauritania	MRT	Sub-Saharan Africa	Official bilateral	France	France (Official bilateral)	116489	7.60066e+06	0.0153262
Mauritania	MRT	Sub-Saharan Africa	Official bilateral	Germany	Germany (Official bilateral)	56441	7.60066e+06	0.00742581
Mauritania	MRT	Sub-Saharan Africa	Official bilateral	India	India (Official bilateral)	107379	7.60066e+06	0.0141276
Mauritania	MRT	Sub-Saharan Africa	Official bilateral	Kuwait	Kuwait (Official bilateral)	269754	7.60066e+06	0.0354909
Mauritania	MRT	Sub-Saharan Africa	Official bilateral	Libya	Libya (Official bilateral)	46611	7.60066e+06	0.0061325
Mauritania	MRT	Sub-Saharan Africa	Official bilateral	Other bilateral	Other bilateral (Official bilateral)	48453	7.60066e+06	0.00637484
Mauritania	MRT	Sub-Saharan Africa	Official bilateral	Saudi Arabia	Saudi Arabia (Official bilateral)	610836	7.60066e+06	0.0803662
Mauritania	MRT	Sub-Saharan Africa	Official bilateral	Spain	Spain (Official bilateral)	21319	7.60066e+06	0.00280489
Mauritania	MRT	Sub-Saharan Africa	Official bilateral	United Arab Emirates	United Arab Emirates (Official bilateral)	27826	7.60066e+06	0.003661
Mauritania	MRT	Sub-Saharan Africa	Official multilateral	African Dev. Bank	African Dev. Bank (Official multilateral)	186886	7.60066e+06	0.0245881
Mauritania	MRT	Sub-Saharan Africa	Official multilateral	International Monetary Fund	International Monetary Fund (Official multilateral)	244042	7.60066e+06	0.032108
Mauritania	MRT	Sub-Saharan Africa	Official multilateral	Other multilateral	Other multilateral (Official multilateral)	1804688	7.60066e+06	0.237438
Mauritania	MRT	Sub-Saharan Africa	Official multilateral	World Bank-IDA	World Bank-IDA (Official multilateral)	387548	7.60066e+06	0.0509888
Mauritania	MRT	Sub-Saharan Africa	Total		(Total)	4286921	7.60066e+06	0.56402
Mauritania	MRT	Sub-Saharan Africa	Total Official bilateral		(Total Official bilateral)	1663756	7.60066e+06	0.218896
Mauritania	MRT	Sub-Saharan Africa	Total Official multilateral		(Total Official multilateral)	2623165	7.60066e+06	0.345123
Moldova	MDA	Europe & Central Asia	Non-official	Austria	Austria (Non-official)	24052	1.19687e+07	0.00200957
Moldova	MDA	Europe & Central Asia	Non-official	Slovenia	Slovenia (Non-official)	18	1.19687e+07	1.50392e-06
Moldova	MDA	Europe & Central Asia	Official bilateral	Germany, Fed.Rep. Of	Germany, Fed.Rep. Of (Official bilateral)	14579	1.19687e+07	0.00121809
Moldova	MDA	Europe & Central Asia	Official bilateral	Japan	Japan (Official bilateral)	58165	1.19687e+07	0.00485975
Moldova	MDA	Europe & Central Asia	Official bilateral	Other Bilateral	Other Bilateral (Official bilateral)	81935	1.19687e+07	0.00684577
Moldova	MDA	Europe & Central Asia	Official bilateral	Russian Federation	Russian Federation (Official bilateral)	34395	1.19687e+07	0.00287374
Moldova	MDA	Europe & Central Asia	Official bilateral	United States	United States (Official bilateral)	25008	1.19687e+07	0.00208945
Moldova	MDA	Europe & Central Asia	Official multilateral	International Monetary Fund	International Monetary Fund (Official multilateral)	457512	1.19687e+07	0.0382257
Moldova	MDA	Europe & Central Asia	Official multilateral	Other Multilaterals	Other Multilaterals (Official multilateral)	510317	1.19687e+07	0.0426376
Moldova	MDA	Europe & Central Asia	Official multilateral	World Bank-IBRD	World Bank-IBRD (Official multilateral)	98839	1.19687e+07	0.00825811
Moldova	MDA	Europe & Central Asia	Official multilateral	World Bank-IDA	World Bank-IDA (Official multilateral)	616773	1.19687e+07	0.0515321
Moldova	MDA	Europe & Central Asia	Total		(Total)	1921594	1.19687e+07	0.160551
Moldova	MDA	Europe & Central Asia	Total Non-official		(Total Non-official)	24070	1.19687e+07	0.00201108
Moldova	MDA	Europe & Central Asia	Total Official bilateral		(Total Official bilateral)	214083	1.19687e+07	0.0178869
Moldova	MDA	Europe & Central Asia	Total Official multilateral		(Total Official multilateral)	1683441	1.19687e+07	0.140653
Mongolia	MNG	East Asia & Pacific	Bondholders	Bond market	Bond market (Bondholders)	3400000	1.39967e+07	0.242914
Mongolia	MNG	East Asia & Pacific	Non-official	Austria	Austria (Non-official)	49237	1.39967e+07	0.00351775
Mongolia	MNG	East Asia & Pacific	Non-official	France	France (Non-official)	5624	1.39967e+07	0.000401808
Mongolia	MNG	East Asia & Pacific	Non-official	Switzerland	Switzerland (Non-official)	156000	1.39967e+07	0.0111455
Mongolia	MNG	East Asia & Pacific	Official bilateral	Austria	Austria (Official bilateral)	3668	1.39967e+07	0.000262061
Mongolia	MNG	East Asia & Pacific	Official bilateral	Belgium	Belgium (Official bilateral)	4983	1.39967e+07	0.000356012
Mongolia	MNG	East Asia & Pacific	Official bilateral	China	China (Official bilateral)	1054662	1.39967e+07	0.0753507
Mongolia	MNG	East Asia & Pacific	Official bilateral	France	France (Official bilateral)	10329	1.39967e+07	0.000737959
Mongolia	MNG	East Asia & Pacific	Official bilateral	Germany	Germany (Official bilateral)	76459	1.39967e+07	0.00546264
Mongolia	MNG	East Asia & Pacific	Official bilateral	India	India (Official bilateral)	27911	1.39967e+07	0.00199411
Mongolia	MNG	East Asia & Pacific	Official bilateral	Japan	Japan (Official bilateral)	1123847	1.39967e+07	0.0802936
Mongolia	MNG	East Asia & Pacific	Official bilateral	Kuwait	Kuwait (Official bilateral)	28748	1.39967e+07	0.00205391
Mongolia	MNG	East Asia & Pacific	Official bilateral	Other bilateral	Other bilateral (Official bilateral)	101634	1.39967e+07	0.00726127
Mongolia	MNG	East Asia & Pacific	Official bilateral	Spain	Spain (Official bilateral)	4195	1.39967e+07	0.000299713
Mongolia	MNG	East Asia & Pacific	Official bilateral	Sweden	Sweden (Official bilateral)	905	1.39967e+07	6.4658e-05
Mongolia	MNG	East Asia & Pacific	Official bilateral	United Arab Emirates	United Arab Emirates (Official bilateral)	3250	1.39967e+07	0.000232197
Mongolia	MNG	East Asia & Pacific	Official multilateral	Asian Dev. Bank	Asian Dev. Bank (Official multilateral)	1452027	1.39967e+07	0.103741
Mongolia	MNG	East Asia & Pacific	Official multilateral	International Monetary Fund	International Monetary Fund (Official multilateral)	284865	1.39967e+07	0.0203523
Mongolia	MNG	East Asia & Pacific	Official multilateral	Other multilateral	Other multilateral (Official multilateral)	64756	1.39967e+07	0.00462651
Mongolia	MNG	East Asia & Pacific	Official multilateral	World Bank-IBRD	World Bank-IBRD (Official multilateral)	50	1.39967e+07	3.57227e-06
Mongolia	MNG	East Asia & Pacific	Official multilateral	World Bank-IDA	World Bank-IDA (Official multilateral)	578889	1.39967e+07	0.0413589
Mongolia	MNG	East Asia & Pacific	Total		(Total)	8432038	1.39967e+07	0.60243
Mongolia	MNG	East Asia & Pacific	Total Bondholders		(Total Bondholders)	3400000	1.39967e+07	0.242914
Mongolia	MNG	East Asia & Pacific	Total Non-official		(Total Non-official)	210861	1.39967e+07	0.015065
Mongolia	MNG	East Asia & Pacific	Total Official bilateral		(Total Official bilateral)	2440590	1.39967e+07	0.174369
Mongolia	MNG	East Asia & Pacific	Total Official multilateral		(Total Official multilateral)	2380587	1.39967e+07	0.170082
Mozambique	MOZ	Sub-Saharan Africa	Bondholders	Bond market	Bond market (Bondholders)	726524	1.52914e+07	0.0475118
Mozambique	MOZ	Sub-Saharan Africa	Non-official	Austria	Austria (Non-official)	17862	1.52914e+07	0.0011681
Mozambique	MOZ	Sub-Saharan Africa	Non-official	Denmark	Denmark (Non-official)	61406	1.52914e+07	0.00401571
Mozambique	MOZ	Sub-Saharan Africa	Non-official	Italy	Italy (Non-official)	8813	1.52914e+07	0.000576335
Mozambique	MOZ	Sub-Saharan Africa	Non-official	Portugal	Portugal (Non-official)	121547	1.52914e+07	0.00794869
Mozambique	MOZ	Sub-Saharan Africa	Non-official	United Kingdom	United Kingdom (Non-official)	478100	1.52914e+07	0.0312658
Mozambique	MOZ	Sub-Saharan Africa	Official bilateral	Brazil	Brazil (Official bilateral)	440215	1.52914e+07	0.0287883
Mozambique	MOZ	Sub-Saharan Africa	Official bilateral	China	China (Official bilateral)	1910117	1.52914e+07	0.124914
Mozambique	MOZ	Sub-Saharan Africa	Official bilateral	France	France (Official bilateral)	231226	1.52914e+07	0.0151213
Mozambique	MOZ	Sub-Saharan Africa	Official bilateral	India	India (Official bilateral)	249313	1.52914e+07	0.0163041
Mozambique	MOZ	Sub-Saharan Africa	Official bilateral	Japan	Japan (Official bilateral)	353556	1.52914e+07	0.0231212
Mozambique	MOZ	Sub-Saharan Africa	Official bilateral	Kuwait	Kuwait (Official bilateral)	57772	1.52914e+07	0.00377806
Mozambique	MOZ	Sub-Saharan Africa	Official bilateral	Libya	Libya (Official bilateral)	313947	1.52914e+07	0.0205309
Mozambique	MOZ	Sub-Saharan Africa	Official bilateral	Other bilateral	Other bilateral (Official bilateral)	640552	1.52914e+07	0.0418896
Mozambique	MOZ	Sub-Saharan Africa	Official bilateral	Portugal	Portugal (Official bilateral)	453096	1.52914e+07	0.0296307
Mozambique	MOZ	Sub-Saharan Africa	Official bilateral	Russian Federation	Russian Federation (Official bilateral)	166421	1.52914e+07	0.0108833
Mozambique	MOZ	Sub-Saharan Africa	Official bilateral	Saudi Arabia	Saudi Arabia (Official bilateral)	37376	1.52914e+07	0.00244424
Mozambique	MOZ	Sub-Saharan Africa	Official bilateral	Spain	Spain (Official bilateral)	24553	1.52914e+07	0.00160567
Mozambique	MOZ	Sub-Saharan Africa	Official multilateral	African Dev. Bank	African Dev. Bank (Official multilateral)	906088	1.52914e+07	0.0592546
Mozambique	MOZ	Sub-Saharan Africa	Official multilateral	International Monetary Fund	International Monetary Fund (Official multilateral)	375010	1.52914e+07	0.0245242
Mozambique	MOZ	Sub-Saharan Africa	Official multilateral	Other multilateral	Other multilateral (Official multilateral)	488358	1.52914e+07	0.0319367
Mozambique	MOZ	Sub-Saharan Africa	Official multilateral	World Bank-IDA	World Bank-IDA (Official multilateral)	3039196	1.52914e+07	0.198751
Mozambique	MOZ	Sub-Saharan Africa	Total		(Total)	11101046	1.52914e+07	0.725964
Mozambique	MOZ	Sub-Saharan Africa	Total Bondholders		(Total Bondholders)	726524	1.52914e+07	0.0475118
Mozambique	MOZ	Sub-Saharan Africa	Total Non-official		(Total Non-official)	687729	1.52914e+07	0.0449747
Mozambique	MOZ	Sub-Saharan Africa	Total Official bilateral		(Total Official bilateral)	4878142	1.52914e+07	0.319011
Mozambique	MOZ	Sub-Saharan Africa	Total Official multilateral		(Total Official multilateral)	4808652	1.52914e+07	0.314467
Myanmar	MMR	East Asia & Pacific	Non-official	China	China (Non-official)	131684	7.60859e+07	0.00173073
Myanmar	MMR	East Asia & Pacific	Non-official	France	France (Non-official)	532	7.60859e+07	6.9921e-06
Myanmar	MMR	East Asia & Pacific	Non-official	Israel	Israel (Non-official)	7142	7.60859e+07	9.38676e-05
Myanmar	MMR	East Asia & Pacific	Non-official	Korea, Republic Of	Korea, Republic Of (Non-official)	34707	7.60859e+07	0.000456156
Myanmar	MMR	East Asia & Pacific	Non-official	Serbia	Serbia (Non-official)	57393	7.60859e+07	0.000754319
Myanmar	MMR	East Asia & Pacific	Non-official	Singapore	Singapore (Non-official)	27540	7.60859e+07	0.00036196
Myanmar	MMR	East Asia & Pacific	Non-official	Sweden	Sweden (Non-official)	8571	7.60859e+07	0.000112649
Myanmar	MMR	East Asia & Pacific	Non-official	Thailand	Thailand (Non-official)	17441	7.60859e+07	0.000229228
Myanmar	MMR	East Asia & Pacific	Official bilateral	Austria	Austria (Official bilateral)	131106	7.60859e+07	0.00172313
Myanmar	MMR	East Asia & Pacific	Official bilateral	China	China (Official bilateral)	3209976	7.60859e+07	0.0421889
Myanmar	MMR	East Asia & Pacific	Official bilateral	Czech Republic		74621	7.60859e+07	0.000980747
Myanmar	MMR	East Asia & Pacific	Official bilateral	Finland		2803	7.60859e+07	3.684e-05
Myanmar	MMR	East Asia & Pacific	Official bilateral	France	France (Official bilateral)	485193	7.60859e+07	0.00637691
Myanmar	MMR	East Asia & Pacific	Official bilateral	Germany	Germany (Official bilateral)	708601	7.60859e+07	0.00931318
Myanmar	MMR	East Asia & Pacific	Official bilateral	India	India (Official bilateral)	208894	7.60859e+07	0.0027455
Myanmar	MMR	East Asia & Pacific	Official bilateral	Italy	Italy (Official bilateral)	7414	7.60859e+07	9.74426e-05
Myanmar	MMR	East Asia & Pacific	Official bilateral	Japan	Japan (Official bilateral)	3108624	7.60859e+07	0.0408568
Myanmar	MMR	East Asia & Pacific	Official bilateral	Netherlands	Netherlands (Official bilateral)	8677	7.60859e+07	0.000114042
Myanmar	MMR	East Asia & Pacific	Official bilateral	Other bilateral	Other bilateral (Official bilateral)	192915	7.60859e+07	0.00253549
Myanmar	MMR	East Asia & Pacific	Official bilateral	Saudi Arabia	Saudi Arabia (Official bilateral)	930	7.60859e+07	1.2223e-05
Myanmar	MMR	East Asia & Pacific	Official bilateral	Thailand	Thailand (Official bilateral)	138808	7.60859e+07	0.00182436
Myanmar	MMR	East Asia & Pacific	Official bilateral	United Kingdom	United Kingdom (Official bilateral)	35664	7.60859e+07	0.000468734
Myanmar	MMR	East Asia & Pacific	Official multilateral	Asian Dev. Bank	Asian Dev. Bank (Official multilateral)	580681	7.60859e+07	0.00763192
Myanmar	MMR	East Asia & Pacific	Official multilateral	International Monetary Fund	International Monetary Fund (Official multilateral)	339842	7.60859e+07	0.00446656
Myanmar	MMR	East Asia & Pacific	Official multilateral	Other multilateral	Other multilateral (Official multilateral)	33060	7.60859e+07	0.000434509
Myanmar	MMR	East Asia & Pacific	Official multilateral	World Bank-IDA	World Bank-IDA (Official multilateral)	1467678	7.60859e+07	0.0192898
Myanmar	MMR	East Asia & Pacific	Total		(Total)	11020498	7.60859e+07	0.144843
Myanmar	MMR	East Asia & Pacific	Total Non-official		(Total Non-official)	285011	7.60859e+07	0.00374591
Myanmar	MMR	East Asia & Pacific	Total Official bilateral		(Total Official bilateral)	8314227	7.60859e+07	0.109274
Myanmar	MMR	East Asia & Pacific	Total Official multilateral		(Total Official multilateral)	2421261	7.60859e+07	0.0318227
Nepal	NPL	South Asia	Non-official	France	France (Non-official)	46	3.06414e+07	1.50124e-06
Nepal	NPL	South Asia	Official bilateral	Japan	Japan (Official bilateral)	284375	3.06414e+07	0.00928075
Nepal	NPL	South Asia	Official bilateral	China	China (Official bilateral)	214866	3.06414e+07	0.00701228
Nepal	NPL	South Asia	Official bilateral	India	India (Official bilateral)	187844	3.06414e+07	0.0061304
Nepal	NPL	South Asia	Official bilateral	Other bilateral	Other bilateral (Official bilateral)	55912	3.06414e+07	0.00182472
Nepal	NPL	South Asia	Official bilateral	Saudi Arabia	Saudi Arabia (Official bilateral)	7179	3.06414e+07	0.000234291
Nepal	NPL	South Asia	Official bilateral	Belgium	Belgium (Official bilateral)	6112	3.06414e+07	0.000199469
Nepal	NPL	South Asia	Official bilateral	Kuwait	Kuwait (Official bilateral)	5365	3.06414e+07	0.00017509
Nepal	NPL	South Asia	Official bilateral	France	France (Official bilateral)	2611	3.06414e+07	8.52116e-05
Nepal	NPL	South Asia	Official bilateral	Austria	Austria (Official bilateral)	154	3.06414e+07	5.02588e-06
Nepal	NPL	South Asia	Official multilateral	World Bank-IDA	World Bank-IDA (Official multilateral)	2877236	3.06414e+07	0.0939003
Nepal	NPL	South Asia	Official multilateral	Asian Dev. Bank	Asian Dev. Bank (Official multilateral)	1998826	3.06414e+07	0.0652329
Nepal	NPL	South Asia	Official multilateral	Other multilateral	Other multilateral (Official multilateral)	204304	3.06414e+07	0.00666758
Nepal	NPL	South Asia	Official multilateral	International Monetary Fund	International Monetary Fund (Official multilateral)	147412	3.06414e+07	0.00481088
Nepal	NPL	South Asia	Total		(Total)	5992242	3.06414e+07	0.19556
Nepal	NPL	South Asia	Total Non-official		(Total Non-official)	46	3.06414e+07	1.50124e-06
Nepal	NPL	South Asia	Total Official bilateral		(Total Official bilateral)	764418	3.06414e+07	0.0249472
Nepal	NPL	South Asia	Total Official multilateral		(Total Official multilateral)	5227778	3.06414e+07	0.170612
Nicaragua	NIC	Latin America & Caribbean	Non-official	Austria	Austria (Non-official)	17121	1.25209e+07	0.00136739
Nicaragua	NIC	Latin America & Caribbean	Non-official	Belgium	Belgium (Non-official)	741	1.25209e+07	5.9181e-05
Nicaragua	NIC	Latin America & Caribbean	Non-official	Netherlands	Netherlands (Non-official)	7878	1.25209e+07	0.000629187
Nicaragua	NIC	Latin America & Caribbean	Official bilateral	China	China (Official bilateral)	19301	1.25209e+07	0.0015415
Nicaragua	NIC	Latin America & Caribbean	Official bilateral	France	France (Official bilateral)	273	1.25209e+07	2.18035e-05
Nicaragua	NIC	Latin America & Caribbean	Official bilateral	Germany, Fed.Rep. Of	Germany, Fed.Rep. Of (Official bilateral)	34265	1.25209e+07	0.00273662
Nicaragua	NIC	Latin America & Caribbean	Official bilateral	Hungary	Hungary (Official bilateral)	77	1.25209e+07	6.14971e-06
Nicaragua	NIC	Latin America & Caribbean	Official bilateral	India	India (Official bilateral)	17375	1.25209e+07	0.00138768
Nicaragua	NIC	Latin America & Caribbean	Official bilateral	Iran, Islamic Republic Of	Iran, Islamic Republic Of (Official bilateral)	49986	1.25209e+07	0.0039922
Nicaragua	NIC	Latin America & Caribbean	Official bilateral	Italy	Italy (Official bilateral)	11511	1.25209e+07	0.000919342
Nicaragua	NIC	Latin America & Caribbean	Official bilateral	Japan	Japan (Official bilateral)	15478	1.25209e+07	0.00123617
Nicaragua	NIC	Latin America & Caribbean	Official bilateral	Kuwait	Kuwait (Official bilateral)	3029	1.25209e+07	0.000241915
Nicaragua	NIC	Latin America & Caribbean	Official bilateral	Libya	Libya (Official bilateral)	101738	1.25209e+07	0.00812544
Nicaragua	NIC	Latin America & Caribbean	Official bilateral	Other Bilateral	Other Bilateral (Official bilateral)	696675	1.25209e+07	0.0556409
Nicaragua	NIC	Latin America & Caribbean	Official bilateral	Spain	Spain (Official bilateral)	223241	1.25209e+07	0.0178294
Nicaragua	NIC	Latin America & Caribbean	Official multilateral	Inter-American Dev. Bank	Inter-American Dev. Bank (Official multilateral)	2088540	1.25209e+07	0.166804
Nicaragua	NIC	Latin America & Caribbean	Official multilateral	International Monetary Fund	International Monetary Fund (Official multilateral)	181134	1.25209e+07	0.0144665
Nicaragua	NIC	Latin America & Caribbean	Official multilateral	Other Multilaterals	Other Multilaterals (Official multilateral)	1434201	1.25209e+07	0.114544
Nicaragua	NIC	Latin America & Caribbean	Official multilateral	World Bank-IDA	World Bank-IDA (Official multilateral)	692201	1.25209e+07	0.0552836
Nicaragua	NIC	Latin America & Caribbean	Total		(Total)	5594765	1.25209e+07	0.446834
Nicaragua	NIC	Latin America & Caribbean	Total Non-official		(Total Non-official)	25740	1.25209e+07	0.00205576
Nicaragua	NIC	Latin America & Caribbean	Total Official bilateral		(Total Official bilateral)	1172950	1.25209e+07	0.0936793
Nicaragua	NIC	Latin America & Caribbean	Total Official multilateral		(Total Official multilateral)	4396075	1.25209e+07	0.351099
Niger	NER	Sub-Saharan Africa	Official bilateral	China	China (Official bilateral)	335073	1.29117e+07	0.0259511
Niger	NER	Sub-Saharan Africa	Official bilateral	Belgium		19627	1.29117e+07	0.0015201
Niger	NER	Sub-Saharan Africa	Official bilateral	France	France (Official bilateral)	110195	1.29117e+07	0.00853451
Niger	NER	Sub-Saharan Africa	Official bilateral	India	India (Official bilateral)	65187	1.29117e+07	0.00504868
Niger	NER	Sub-Saharan Africa	Official bilateral	Kuwait	Kuwait (Official bilateral)	36793	1.29117e+07	0.00284959
Niger	NER	Sub-Saharan Africa	Official bilateral	Libya	Libya (Official bilateral)	16000	1.29117e+07	0.00123919
Niger	NER	Sub-Saharan Africa	Official bilateral	Other bilateral	Other bilateral (Official bilateral)	55191	1.29117e+07	0.0042745
Niger	NER	Sub-Saharan Africa	Official bilateral	Saudi Arabia	Saudi Arabia (Official bilateral)	67385	1.29117e+07	0.00521891
Niger	NER	Sub-Saharan Africa	Official bilateral	United Arab Emirates	United Arab Emirates (Official bilateral)	5571	1.29117e+07	0.000431469
Niger	NER	Sub-Saharan Africa	Official multilateral	African Dev. Bank	African Dev. Bank (Official multilateral)	328486	1.29117e+07	0.025441
Niger	NER	Sub-Saharan Africa	Official multilateral	International Monetary Fund	International Monetary Fund (Official multilateral)	345668	1.29117e+07	0.0267717
Niger	NER	Sub-Saharan Africa	Official multilateral	Other multilateral	Other multilateral (Official multilateral)	780905	1.29117e+07	0.0604805
Niger	NER	Sub-Saharan Africa	Official multilateral	World Bank-IDA	World Bank-IDA (Official multilateral)	1346786	1.29117e+07	0.104307
Niger	NER	Sub-Saharan Africa	Total		(Total)	3512866	1.29117e+07	0.272069
Niger	NER	Sub-Saharan Africa	Total Official bilateral		(Total Official bilateral)	711021	1.29117e+07	0.055068
Niger	NER	Sub-Saharan Africa	Total Official multilateral		(Total Official multilateral)	2801845	1.29117e+07	0.217001
Nigeria	NGA	Sub-Saharan Africa	Bondholders	Bond market	Bond market (Bondholders)	11168352	4.4812e+08	0.0249227
Nigeria	NGA	Sub-Saharan Africa	Official multilateral	World Bank-IDA	World Bank-IDA (Official multilateral)	9549703	4.4812e+08	0.0213106
Nigeria	NGA	Sub-Saharan Africa	Official bilateral	China	China (Official bilateral)	3175120	4.4812e+08	0.00708542
Nigeria	NGA	Sub-Saharan Africa	Official multilateral	International Monetary Fund	International Monetary Fund (Official multilateral)	2316751	4.4812e+08	0.00516993
Nigeria	NGA	Sub-Saharan Africa	Official multilateral	African Dev. Bank	African Dev. Bank (Official multilateral)	2271826	4.4812e+08	0.00506968
Nigeria	NGA	Sub-Saharan Africa	Official multilateral	World Bank-IBRD	World Bank-IBRD (Official multilateral)	409507	4.4812e+08	0.000913832
Nigeria	NGA	Sub-Saharan Africa	Official bilateral	France	France (Official bilateral)	361039	4.4812e+08	0.000805674
Nigeria	NGA	Sub-Saharan Africa	Official multilateral	Other multilateral	Other multilateral (Official multilateral)	285435	4.4812e+08	0.00063696
Nigeria	NGA	Sub-Saharan Africa	Official bilateral	Germany	Germany (Official bilateral)	202272	4.4812e+08	0.000451379
Nigeria	NGA	Sub-Saharan Africa	Official bilateral	Japan	Japan (Official bilateral)	75742	4.4812e+08	0.000169022
Nigeria	NGA	Sub-Saharan Africa	Official bilateral	India	India (Official bilateral)	32137	4.4812e+08	7.17151e-05
Nigeria	NGA	Sub-Saharan Africa	Total		(Total)	29847885	4.4812e+08	0.0666068
Nigeria	NGA	Sub-Saharan Africa	Total Bondholders		(Total Bondholders)	11168352	4.4812e+08	0.0249227
Nigeria	NGA	Sub-Saharan Africa	Total Official bilateral		(Total Official bilateral)	3846310	4.4812e+08	0.00858321
Nigeria	NGA	Sub-Saharan Africa	Total Official multilateral		(Total Official multilateral)	14833223	4.4812e+08	0.033101
Pakistan	PAK	South Asia	Bondholders	Bond market	Bond market (Bondholders)	5300000	2.78222e+08	0.0190495
Pakistan	PAK	South Asia	Non-official	Bahrain	Bahrain (Non-official)	148191	2.78222e+08	0.000532636
Pakistan	PAK	South Asia	Non-official	China	China (Non-official)	1384816	2.78222e+08	0.00497738
Pakistan	PAK	South Asia	Non-official	Multiple lenders	Multiple lenders (Non-official)	281145	2.78222e+08	0.00101051
Pakistan	PAK	South Asia	Non-official	Singapore		155000	2.78222e+08	0.000557109
Pakistan	PAK	South Asia	Non-official	United Arab Emirates	United Arab Emirates (Non-official)	923854	2.78222e+08	0.00332057
Pakistan	PAK	South Asia	Non-official	United Kingdom	United Kingdom (Non-official)	726644	2.78222e+08	0.00261174
Pakistan	PAK	South Asia	Official bilateral	Austria	Austria (Official bilateral)	23040	2.78222e+08	8.28116e-05
Pakistan	PAK	South Asia	Official bilateral	Belgium	Belgium (Official bilateral)	16451	2.78222e+08	5.91291e-05
Pakistan	PAK	South Asia	Official bilateral	Canada	Canada (Official bilateral)	394312	2.78222e+08	0.00141726
Pakistan	PAK	South Asia	Official bilateral	China	China (Official bilateral)	20235159	2.78222e+08	0.0727303
Pakistan	PAK	South Asia	Official bilateral	Finland		3300	2.78222e+08	1.1861e-05
Pakistan	PAK	South Asia	Official bilateral	France	France (Official bilateral)	1563322	2.78222e+08	0.00561898
Pakistan	PAK	South Asia	Official bilateral	Germany	Germany (Official bilateral)	1290300	2.78222e+08	0.00463767
Pakistan	PAK	South Asia	Official bilateral	Italy	Italy (Official bilateral)	162658	2.78222e+08	0.000584634
Pakistan	PAK	South Asia	Official bilateral	Japan	Japan (Official bilateral)	5389965	2.78222e+08	0.0193729
Pakistan	PAK	South Asia	Official bilateral	Kuwait	Kuwait (Official bilateral)	181769	2.78222e+08	0.000653324
Pakistan	PAK	South Asia	Official bilateral	Libya	Libya (Official bilateral)	3939	2.78222e+08	1.41578e-05
Pakistan	PAK	South Asia	Official bilateral	Multiple lenders	Multiple lenders (Official bilateral)	158138	2.78222e+08	0.000568388
Pakistan	PAK	South Asia	Official bilateral	Netherlands	Netherlands (Official bilateral)	81425	2.78222e+08	0.000292662
Pakistan	PAK	South Asia	Official bilateral	Norway	Norway (Official bilateral)	9774	2.78222e+08	3.51302e-05
Pakistan	PAK	South Asia	Official bilateral	Other bilateral	Other bilateral (Official bilateral)	428824	2.78222e+08	0.0015413
Pakistan	PAK	South Asia	Official bilateral	Russian Federation		68430	2.78222e+08	0.000245955
Pakistan	PAK	South Asia	Official bilateral	Saudi Arabia	Saudi Arabia (Official bilateral)	679249	2.78222e+08	0.00244139
Pakistan	PAK	South Asia	Official bilateral	Spain	Spain (Official bilateral)	61022	2.78222e+08	0.000219329
Pakistan	PAK	South Asia	Official bilateral	Sweden	Sweden (Official bilateral)	86306	2.78222e+08	0.000310206
Pakistan	PAK	South Asia	Official bilateral	Switzerland	Switzerland (Official bilateral)	74751	2.78222e+08	0.000268674
Pakistan	PAK	South Asia	Official bilateral	United Arab Emirates	United Arab Emirates (Official bilateral)	27666	2.78222e+08	9.94386e-05
Pakistan	PAK	South Asia	Official bilateral	United Kingdom	United Kingdom (Official bilateral)	4545	2.78222e+08	1.63359e-05
Pakistan	PAK	South Asia	Official bilateral	United States	United States (Official bilateral)	1108248	2.78222e+08	0.00398332
Pakistan	PAK	South Asia	Official multilateral	Asian Dev. Bank	Asian Dev. Bank (Official multilateral)	12314143	2.78222e+08	0.0442601
Pakistan	PAK	South Asia	Official multilateral	International Monetary Fund	International Monetary Fund (Official multilateral)	8097224	2.78222e+08	0.0291035
Pakistan	PAK	South Asia	Official multilateral	Other multilateral	Other multilateral (Official multilateral)	2521556	2.78222e+08	0.00906311
Pakistan	PAK	South Asia	Official multilateral	World Bank-IBRD	World Bank-IBRD (Official multilateral)	1416886	2.78222e+08	0.00509265
Pakistan	PAK	South Asia	Official multilateral	World Bank-IDA	World Bank-IDA (Official multilateral)	13887933	2.78222e+08	0.0499167
Pakistan	PAK	South Asia	Total		(Total)	79209985	2.78222e+08	0.284701
Pakistan	PAK	South Asia	Total Bondholders		(Total Bondholders)	5300000	2.78222e+08	0.0190495
Pakistan	PAK	South Asia	Total Non-official		(Total Non-official)	3619650	2.78222e+08	0.0130099
Pakistan	PAK	South Asia	Total Official bilateral		(Total Official bilateral)	32052592	2.78222e+08	0.115205
Pakistan	PAK	South Asia	Total Official multilateral		(Total Official multilateral)	38237742	2.78222e+08	0.137436
Papua New Guinea	PNG	East Asia & Pacific	Bondholders	Bond market	Bond market (Bondholders)	500000	2.48291e+07	0.0201377
Papua New Guinea	PNG	East Asia & Pacific	Non-official	Czech Republic	Czech Republic (Non-official)	79137	2.48291e+07	0.00318727
Papua New Guinea	PNG	East Asia & Pacific	Non-official	Multiple lenders		73333	2.48291e+07	0.00295351
Papua New Guinea	PNG	East Asia & Pacific	Non-official	Singapore	Singapore (Non-official)	500000	2.48291e+07	0.0201377
Papua New Guinea	PNG	East Asia & Pacific	Official bilateral	Australia	Australia (Official bilateral)	300000	2.48291e+07	0.0120826
Papua New Guinea	PNG	East Asia & Pacific	Official bilateral	China	China (Official bilateral)	839321	2.48291e+07	0.0338039
Papua New Guinea	PNG	East Asia & Pacific	Official bilateral	Germany	Germany (Official bilateral)	6135	2.48291e+07	0.000247089
Papua New Guinea	PNG	East Asia & Pacific	Official bilateral	Japan	Japan (Official bilateral)	157762	2.48291e+07	0.00635391
Papua New Guinea	PNG	East Asia & Pacific	Official multilateral	Asian Dev. Bank	Asian Dev. Bank (Official multilateral)	1358687	2.48291e+07	0.0547215
Papua New Guinea	PNG	East Asia & Pacific	Official multilateral	International Monetary Fund	International Monetary Fund (Official multilateral)	173536	2.48291e+07	0.00698922
Papua New Guinea	PNG	East Asia & Pacific	Official multilateral	Other multilateral	Other multilateral (Official multilateral)	49006	2.48291e+07	0.00197373
Papua New Guinea	PNG	East Asia & Pacific	Official multilateral	World Bank-IBRD	World Bank-IBRD (Official multilateral)	18018	2.48291e+07	0.000725681
Papua New Guinea	PNG	East Asia & Pacific	Official multilateral	World Bank-IDA	World Bank-IDA (Official multilateral)	427571	2.48291e+07	0.0172206
Papua New Guinea	PNG	East Asia & Pacific	Total		(Total)	4482506	2.48291e+07	0.180534
Papua New Guinea	PNG	East Asia & Pacific	Total Bondholders		(Total Bondholders)	500000	2.48291e+07	0.0201377
Papua New Guinea	PNG	East Asia & Pacific	Total Non-official		(Total Non-official)	652470	2.48291e+07	0.0262784
Papua New Guinea	PNG	East Asia & Pacific	Total Official bilateral		(Total Official bilateral)	1303218	2.48291e+07	0.0524875
Papua New Guinea	PNG	East Asia & Pacific	Total Official multilateral		(Total Official multilateral)	2026818	2.48291e+07	0.0816307
Rwanda	RWA	Sub-Saharan Africa	Bondholders	Bond market	Bond market (Bondholders)	420983	1.03544e+07	0.0406573
Rwanda	RWA	Sub-Saharan Africa	Official bilateral	China	China (Official bilateral)	194717	1.03544e+07	0.0188052
Rwanda	RWA	Sub-Saharan Africa	Official bilateral	Japan	Japan (Official bilateral)	75165	1.03544e+07	0.00725922
Rwanda	RWA	Sub-Saharan Africa	Official bilateral	India	India (Official bilateral)	71643	1.03544e+07	0.00691908
Rwanda	RWA	Sub-Saharan Africa	Official bilateral	Saudi Arabia	Saudi Arabia (Official bilateral)	64637	1.03544e+07	0.00624246
Rwanda	RWA	Sub-Saharan Africa	Official bilateral	Kuwait	Kuwait (Official bilateral)	63389	1.03544e+07	0.00612193
Rwanda	RWA	Sub-Saharan Africa	Official bilateral	Other bilateral	Other bilateral (Official bilateral)	13797	1.03544e+07	0.00133247
Rwanda	RWA	Sub-Saharan Africa	Official bilateral	United Arab Emirates	United Arab Emirates (Official bilateral)	2562	1.03544e+07	0.000247431
Rwanda	RWA	Sub-Saharan Africa	Official bilateral	Libya	Libya (Official bilateral)	290	1.03544e+07	2.80074e-05
Rwanda	RWA	Sub-Saharan Africa	Official multilateral	World Bank-IDA	World Bank-IDA (Official multilateral)	1897342	1.03544e+07	0.18324
Rwanda	RWA	Sub-Saharan Africa	Official multilateral	African Dev. Bank	African Dev. Bank (Official multilateral)	786441	1.03544e+07	0.0759522
Rwanda	RWA	Sub-Saharan Africa	Official multilateral	International Monetary Fund	International Monetary Fund (Official multilateral)	305607	1.03544e+07	0.0295146
Rwanda	RWA	Sub-Saharan Africa	Official multilateral	Other multilateral	Other multilateral (Official multilateral)	273845	1.03544e+07	0.0264472
Rwanda	RWA	Sub-Saharan Africa	Non-official	Multiple lenders		43110	1.03544e+07	0.00416344
Rwanda	RWA	Sub-Saharan Africa	Total		(Total)	4213529	1.03544e+07	0.406931
Rwanda	RWA	Sub-Saharan Africa	Total Bondholders		(Total Bondholders)	420983	1.03544e+07	0.0406573
Rwanda	RWA	Sub-Saharan Africa	Total Non-official		(Total Non-official)	43110	1.03544e+07	0.00416344
Rwanda	RWA	Sub-Saharan Africa	Total Official bilateral		(Total Official bilateral)	486201	1.03544e+07	0.0469559
Rwanda	RWA	Sub-Saharan Africa	Total Official multilateral		(Total Official multilateral)	3263235	1.03544e+07	0.315154
Samoa	WSM	East Asia & Pacific	Official bilateral	China	China (Official bilateral)	148942	852250	0.174763
Samoa	WSM	East Asia & Pacific	Official bilateral	Japan	Japan (Official bilateral)	32854	852250	0.0385497
Samoa	WSM	East Asia & Pacific	Official multilateral	World Bank-IDA	World Bank-IDA (Official multilateral)	110283	852250	0.129402
Samoa	WSM	East Asia & Pacific	Official multilateral	Asian Dev. Bank	Asian Dev. Bank (Official multilateral)	84718	852250	0.0994051
Samoa	WSM	East Asia & Pacific	Official multilateral	International Monetary Fund	International Monetary Fund (Official multilateral)	20951	852250	0.0245832
Samoa	WSM	East Asia & Pacific	Official multilateral	Other multilateral	Other multilateral (Official multilateral)	10807	852250	0.0126805
Samoa	WSM	East Asia & Pacific	Total		(Total)	408555	852250	0.479384
Samoa	WSM	East Asia & Pacific	Total Official bilateral		(Total Official bilateral)	181796	852250	0.213313
Samoa	WSM	East Asia & Pacific	Total Official multilateral		(Total Official multilateral)	226759	852250	0.266071
Sao Tome and Principe	STP	Sub-Saharan Africa	Non-official	Hong Kong	Hong Kong (Non-official)	10000	418637	0.023887
Sao Tome and Principe	STP	Sub-Saharan Africa	Official bilateral	Belgium	Belgium (Official bilateral)	835	418637	0.00199457
Sao Tome and Principe	STP	Sub-Saharan Africa	Official bilateral	Brazil	Brazil (Official bilateral)	4564	418637	0.010902
Sao Tome and Principe	STP	Sub-Saharan Africa	Official bilateral	Italy	Italy (Official bilateral)	27457	418637	0.0655866
Sao Tome and Principe	STP	Sub-Saharan Africa	Official bilateral	Kuwait	Kuwait (Official bilateral)	247	418637	0.000590009
Sao Tome and Principe	STP	Sub-Saharan Africa	Official bilateral	Other Bilateral	Other Bilateral (Official bilateral)	79942	418637	0.190958
Sao Tome and Principe	STP	Sub-Saharan Africa	Official bilateral	Portugal	Portugal (Official bilateral)	55999	418637	0.133765
Sao Tome and Principe	STP	Sub-Saharan Africa	Official multilateral	African Dev. Bank	African Dev. Bank (Official multilateral)	17183	418637	0.0410451
Sao Tome and Principe	STP	Sub-Saharan Africa	Official multilateral	International Monetary Fund	International Monetary Fund (Official multilateral)	18835	418637	0.0449912
Sao Tome and Principe	STP	Sub-Saharan Africa	Official multilateral	Other Multilaterals	Other Multilaterals (Official multilateral)	17844	418637	0.042624
Sao Tome and Principe	STP	Sub-Saharan Africa	Official multilateral	World Bank-IDA	World Bank-IDA (Official multilateral)	11138	418637	0.0266054
Sao Tome and Principe	STP	Sub-Saharan Africa	Total		(Total)	244045	418637	0.582951
Sao Tome and Principe	STP	Sub-Saharan Africa	Total Non-official		(Total Non-official)	10000	418637	0.023887
Sao Tome and Principe	STP	Sub-Saharan Africa	Total Official bilateral		(Total Official bilateral)	169044	418637	0.403796
Sao Tome and Principe	STP	Sub-Saharan Africa	Total Official multilateral		(Total Official multilateral)	65001	418637	0.155268
Senegal	SEN	Sub-Saharan Africa	Bondholders	Bond market	Bond market (Bondholders)	4121769	2.35781e+07	0.174814
Senegal	SEN	Sub-Saharan Africa	Non-official	Austria	Austria (Non-official)	21222	2.35781e+07	0.000900073
Senegal	SEN	Sub-Saharan Africa	Non-official	France	France (Non-official)	391487	2.35781e+07	0.0166039
Senegal	SEN	Sub-Saharan Africa	Non-official	Italy	Italy (Non-official)	331	2.35781e+07	1.40385e-05
Senegal	SEN	Sub-Saharan Africa	Non-official	Spain	Spain (Non-official)	27794	2.35781e+07	0.00117881
Senegal	SEN	Sub-Saharan Africa	Non-official	Switzerland	Switzerland (Non-official)	42128	2.35781e+07	0.00178674
Senegal	SEN	Sub-Saharan Africa	Non-official	United Kingdom		594840	2.35781e+07	0.0252285
Senegal	SEN	Sub-Saharan Africa	Official bilateral	Austria	Austria (Official bilateral)	3008	2.35781e+07	0.000127576
Senegal	SEN	Sub-Saharan Africa	Official bilateral	Belgium	Belgium (Official bilateral)	2494	2.35781e+07	0.000105776
Senegal	SEN	Sub-Saharan Africa	Official bilateral	China	China (Official bilateral)	1225446	2.35781e+07	0.0519739
Senegal	SEN	Sub-Saharan Africa	Official bilateral	France	France (Official bilateral)	674862	2.35781e+07	0.0286224
Senegal	SEN	Sub-Saharan Africa	Official bilateral	Germany	Germany (Official bilateral)	153827	2.35781e+07	0.00652415
Senegal	SEN	Sub-Saharan Africa	Official bilateral	India	India (Official bilateral)	295133	2.35781e+07	0.0125173
Senegal	SEN	Sub-Saharan Africa	Official bilateral	Italy	Italy (Official bilateral)	23807	2.35781e+07	0.00100971
Senegal	SEN	Sub-Saharan Africa	Official bilateral	Japan	Japan (Official bilateral)	21234	2.35781e+07	0.000900582
Senegal	SEN	Sub-Saharan Africa	Official bilateral	Kuwait	Kuwait (Official bilateral)	183921	2.35781e+07	0.00780051
Senegal	SEN	Sub-Saharan Africa	Official bilateral	Other bilateral	Other bilateral (Official bilateral)	44967	2.35781e+07	0.00190715
Senegal	SEN	Sub-Saharan Africa	Official bilateral	Saudi Arabia	Saudi Arabia (Official bilateral)	65149	2.35781e+07	0.00276312
Senegal	SEN	Sub-Saharan Africa	Official bilateral	Spain	Spain (Official bilateral)	60260	2.35781e+07	0.00255576
Senegal	SEN	Sub-Saharan Africa	Official bilateral	Turkey	Turkey (Official bilateral)	131910	2.35781e+07	0.0055946
Senegal	SEN	Sub-Saharan Africa	Official bilateral	United Arab Emirates	United Arab Emirates (Official bilateral)	10544	2.35781e+07	0.000447195
Senegal	SEN	Sub-Saharan Africa	Official multilateral	African Dev. Bank	African Dev. Bank (Official multilateral)	970297	2.35781e+07	0.0411525
Senegal	SEN	Sub-Saharan Africa	Official multilateral	International Monetary Fund	International Monetary Fund (Official multilateral)	218536	2.35781e+07	0.00926861
Senegal	SEN	Sub-Saharan Africa	Official multilateral	Other multilateral	Other multilateral (Official multilateral)	1118959	2.35781e+07	0.0474576
Senegal	SEN	Sub-Saharan Africa	Official multilateral	World Bank-IDA	World Bank-IDA (Official multilateral)	2656661	2.35781e+07	0.112675
Senegal	SEN	Sub-Saharan Africa	Total		(Total)	13060585	2.35781e+07	0.553929
Senegal	SEN	Sub-Saharan Africa	Total Bondholders		(Total Bondholders)	4121769	2.35781e+07	0.174814
Senegal	SEN	Sub-Saharan Africa	Total Non-official		(Total Non-official)	1077802	2.35781e+07	0.045712
Senegal	SEN	Sub-Saharan Africa	Total Official bilateral		(Total Official bilateral)	2896561	2.35781e+07	0.12285
Senegal	SEN	Sub-Saharan Africa	Total Official multilateral		(Total Official multilateral)	4964453	2.35781e+07	0.210554
Sierra Leone	SLE	Sub-Saharan Africa	Non-official	Multiple lenders	Multiple lenders (Non-official)	193440	4.12173e+06	0.0469317
Sierra Leone	SLE	Sub-Saharan Africa	Official bilateral	China	China (Official bilateral)	44495	4.12173e+06	0.0107952
Sierra Leone	SLE	Sub-Saharan Africa	Official bilateral	India	India (Official bilateral)	31225	4.12173e+06	0.0075757
Sierra Leone	SLE	Sub-Saharan Africa	Official bilateral	Kuwait	Kuwait (Official bilateral)	64151	4.12173e+06	0.0155641
Sierra Leone	SLE	Sub-Saharan Africa	Official bilateral	Saudi Arabia	Saudi Arabia (Official bilateral)	28161	4.12173e+06	0.00683232
Sierra Leone	SLE	Sub-Saharan Africa	Official multilateral	African Dev. Bank	African Dev. Bank (Official multilateral)	138429	4.12173e+06	0.0335851
Sierra Leone	SLE	Sub-Saharan Africa	Official multilateral	International Monetary Fund	International Monetary Fund (Official multilateral)	502914	4.12173e+06	0.122015
Sierra Leone	SLE	Sub-Saharan Africa	Official multilateral	Other multilateral	Other multilateral (Official multilateral)	270857	4.12173e+06	0.0657143
Sierra Leone	SLE	Sub-Saharan Africa	Official multilateral	World Bank-IDA	World Bank-IDA (Official multilateral)	347957	4.12173e+06	0.0844201
Sierra Leone	SLE	Sub-Saharan Africa	Total		(Total)	1621629	4.12173e+06	0.393434
Sierra Leone	SLE	Sub-Saharan Africa	Total Non-official		(Total Non-official)	193440	4.12173e+06	0.0469317
Sierra Leone	SLE	Sub-Saharan Africa	Total Official bilateral		(Total Official bilateral)	168032	4.12173e+06	0.0407673
Sierra Leone	SLE	Sub-Saharan Africa	Total Official multilateral		(Total Official multilateral)	1260157	4.12173e+06	0.305735
Solomon Islands	SLB	East Asia & Pacific	Official bilateral	Other Bilateral	Other Bilateral (Official bilateral)	7386	1.58991e+06	0.00464554
Solomon Islands	SLB	East Asia & Pacific	Official multilateral	Asian Dev. Bank	Asian Dev. Bank (Official multilateral)	47789	1.58991e+06	0.0300576
Solomon Islands	SLB	East Asia & Pacific	Official multilateral	World Bank-IDA	World Bank-IDA (Official multilateral)	38543	1.58991e+06	0.0242422
Solomon Islands	SLB	East Asia & Pacific	Official multilateral	International Monetary Fund	International Monetary Fund (Official multilateral)	14975	1.58991e+06	0.00941875
Solomon Islands	SLB	East Asia & Pacific	Official multilateral	Other multilateral	Other multilateral (Official multilateral)	4357	1.58991e+06	0.0027404
Solomon Islands	SLB	East Asia & Pacific	Total		(Total)	113050	1.58991e+06	0.0711045
Solomon Islands	SLB	East Asia & Pacific	Total Official bilateral		(Total Official bilateral)	7386	1.58991e+06	0.00464554
Solomon Islands	SLB	East Asia & Pacific	Total Official multilateral		(Total Official multilateral)	105664	1.58991e+06	0.066459
Somalia	SOM	Sub-Saharan Africa	Non-official	Italy	Italy (Non-official)	20970	4690265	0.00447096
Somalia	SOM	Sub-Saharan Africa	Official bilateral	Denmark	Denmark (Official bilateral)	1224	4690265	0.000260966
Somalia	SOM	Sub-Saharan Africa	Official bilateral	France	France (Official bilateral)	36034	4690265	0.00768272
Somalia	SOM	Sub-Saharan Africa	Official bilateral	Italy	Italy (Official bilateral)	250374	4690265	0.0533816
Somalia	SOM	Sub-Saharan Africa	Official bilateral	Japan	Japan (Official bilateral)	59274	4690265	0.0126377
Somalia	SOM	Sub-Saharan Africa	Official bilateral	Kuwait	Kuwait (Official bilateral)	82963	4690265	0.0176883
Somalia	SOM	Sub-Saharan Africa	Official bilateral	Libya	Libya (Official bilateral)	8250	4690265	0.00175896
Somalia	SOM	Sub-Saharan Africa	Official bilateral	Netherlands	Netherlands (Official bilateral)	1150	4690265	0.000245189
Somalia	SOM	Sub-Saharan Africa	Official bilateral	Norway	Norway (Official bilateral)	631	4690265	0.000134534
Somalia	SOM	Sub-Saharan Africa	Official bilateral	Other bilateral	Other bilateral (Official bilateral)	41438	4690265	0.0088349
Somalia	SOM	Sub-Saharan Africa	Official bilateral	Russian Federation	Russian Federation (Official bilateral)	417760	4690265	0.0890696
Somalia	SOM	Sub-Saharan Africa	Official bilateral	Saudi Arabia	Saudi Arabia (Official bilateral)	58880	4690265	0.0125537
Somalia	SOM	Sub-Saharan Africa	Official bilateral	Spain	Spain (Official bilateral)	20000	4690265	0.00426415
Somalia	SOM	Sub-Saharan Africa	Official bilateral	United Arab Emirates	United Arab Emirates (Official bilateral)	94222	4690265	0.0200888
Somalia	SOM	Sub-Saharan Africa	Official bilateral	United Kingdom	United Kingdom (Official bilateral)	25424	4690265	0.00542059
Somalia	SOM	Sub-Saharan Africa	Official bilateral	United States	United States (Official bilateral)	249370	4690265	0.0531676
Somalia	SOM	Sub-Saharan Africa	Official multilateral	African Dev. Bank	African Dev. Bank (Official multilateral)	98608	4690265	0.021024
Somalia	SOM	Sub-Saharan Africa	Official multilateral	International Monetary Fund	International Monetary Fund (Official multilateral)	218503	4690265	0.0465865
Somalia	SOM	Sub-Saharan Africa	Official multilateral	Other multilateral	Other multilateral (Official multilateral)	204372	4690265	0.0435737
Somalia	SOM	Sub-Saharan Africa	Official multilateral	World Bank-IDA	World Bank-IDA (Official multilateral)	411338	4690265	0.0877004
Somalia	SOM	Sub-Saharan Africa	Total		(Total)	2300786	4690265	0.490545
Somalia	SOM	Sub-Saharan Africa	Total Non-official		(Total Non-official)	20970	4690265	0.00447096
Somalia	SOM	Sub-Saharan Africa	Total Official bilateral		(Total Official bilateral)	1346996	4690265	0.28719
Somalia	SOM	Sub-Saharan Africa	Total Official multilateral		(Total Official multilateral)	932821	4690265	0.198884
St. Lucia	LCA	Latin America & Caribbean	Bondholders	Bond market	Bond market (Bondholders)	271536	2.12245e+06	0.127935
St. Lucia	LCA	Latin America & Caribbean	Official bilateral	China	China (Official bilateral)	16735	2.12245e+06	0.00788475
St. Lucia	LCA	Latin America & Caribbean	Official bilateral	France	France (Official bilateral)	2507	2.12245e+06	0.00118118
St. Lucia	LCA	Latin America & Caribbean	Official bilateral	Kuwait	Kuwait (Official bilateral)	6118	2.12245e+06	0.00288252
St. Lucia	LCA	Latin America & Caribbean	Official bilateral	Other Bilateral	Other Bilateral (Official bilateral)	22600	2.12245e+06	0.0106481
St. Lucia	LCA	Latin America & Caribbean	Official multilateral	International Monetary Fund	International Monetary Fund (Official multilateral)	21732	2.12245e+06	0.0102391
St. Lucia	LCA	Latin America & Caribbean	Official multilateral	Other Multilaterals	Other Multilaterals (Official multilateral)	136145	2.12245e+06	0.0641452
St. Lucia	LCA	Latin America & Caribbean	Official multilateral	World Bank-IBRD	World Bank-IBRD (Official multilateral)	3492	2.12245e+06	0.00164527
St. Lucia	LCA	Latin America & Caribbean	Official multilateral	World Bank-IDA	World Bank-IDA (Official multilateral)	83128	2.12245e+06	0.039166
St. Lucia	LCA	Latin America & Caribbean	Total		(Total)	563994	2.12245e+06	0.265728
St. Lucia	LCA	Latin America & Caribbean	Total Bondholders		(Total Bondholders)	271536	2.12245e+06	0.127935
St. Lucia	LCA	Latin America & Caribbean	Total Official bilateral		(Total Official bilateral)	47960	2.12245e+06	0.0225965
St. Lucia	LCA	Latin America & Caribbean	Total Official multilateral		(Total Official multilateral)	244498	2.12245e+06	0.115196
St. Vincent and the Grenadines	VCT	Latin America & Caribbean	Bondholders	Bond market	Bond market (Bondholders)	7900	824719	0.00957903
St. Vincent and the Grenadines	VCT	Latin America & Caribbean	Official bilateral	China	China (Official bilateral)	37067	824719	0.044945
St. Vincent and the Grenadines	VCT	Latin America & Caribbean	Official bilateral	France	France (Official bilateral)	70	824719	8.48774e-05
St. Vincent and the Grenadines	VCT	Latin America & Caribbean	Official bilateral	Kuwait	Kuwait (Official bilateral)	2386	824719	0.00289311
St. Vincent and the Grenadines	VCT	Latin America & Caribbean	Official bilateral	Other Bilateral	Other Bilateral (Official bilateral)	3747	824719	0.00454337
St. Vincent and the Grenadines	VCT	Latin America & Caribbean	Official bilateral	United Arab Emirates	United Arab Emirates (Official bilateral)	8401	824719	0.0101865
St. Vincent and the Grenadines	VCT	Latin America & Caribbean	Official bilateral	United Kingdom	United Kingdom (Official bilateral)	3465	824719	0.00420143
St. Vincent and the Grenadines	VCT	Latin America & Caribbean	Official bilateral	United States	United States (Official bilateral)	2032	824719	0.00246387
St. Vincent and the Grenadines	VCT	Latin America & Caribbean	Official multilateral	International Monetary Fund	International Monetary Fund (Official multilateral)	15360	824719	0.0186245
St. Vincent and the Grenadines	VCT	Latin America & Caribbean	Official multilateral	Other Multilaterals	Other Multilaterals (Official multilateral)	207069	824719	0.251078
St. Vincent and the Grenadines	VCT	Latin America & Caribbean	Official multilateral	World Bank-IBRD	World Bank-IBRD (Official multilateral)	771	824719	0.000934864
St. Vincent and the Grenadines	VCT	Latin America & Caribbean	Official multilateral	World Bank-IDA	World Bank-IDA (Official multilateral)	68334	824719	0.0828574
St. Vincent and the Grenadines	VCT	Latin America & Caribbean	Total		(Total)	356601	824719	0.432391
St. Vincent and the Grenadines	VCT	Latin America & Caribbean	Total Bondholders		(Total Bondholders)	7900	824719	0.00957903
St. Vincent and the Grenadines	VCT	Latin America & Caribbean	Total Official bilateral		(Total Official bilateral)	57167	824719	0.069317
St. Vincent and the Grenadines	VCT	Latin America & Caribbean	Total Official multilateral		(Total Official multilateral)	291534	824719	0.353495
Tajikistan	TJK	Europe & Central Asia	Bondholders	Bond market	Bond market (Bondholders)	500000	8.11663e+06	0.0616019
Tajikistan	TJK	Europe & Central Asia	Non-official	France	France (Non-official)	22468	8.11663e+06	0.00276815
Tajikistan	TJK	Europe & Central Asia	Official bilateral	China	China (Official bilateral)	1122724	8.11663e+06	0.138324
Tajikistan	TJK	Europe & Central Asia	Official bilateral	Germany	Germany (Official bilateral)	19209	8.11663e+06	0.00236662
Tajikistan	TJK	Europe & Central Asia	Official bilateral	Kuwait	Kuwait (Official bilateral)	35126	8.11663e+06	0.00432766
Tajikistan	TJK	Europe & Central Asia	Official bilateral	Saudi Arabia	Saudi Arabia (Official bilateral)	79037	8.11663e+06	0.00973767
Tajikistan	TJK	Europe & Central Asia	Official bilateral	United Arab Emirates	United Arab Emirates (Official bilateral)	9708	8.11663e+06	0.00119606
Tajikistan	TJK	Europe & Central Asia	Official bilateral	United States	United States (Official bilateral)	3527	8.11663e+06	0.00043454
Tajikistan	TJK	Europe & Central Asia	Official multilateral	Asian Dev. Bank	Asian Dev. Bank (Official multilateral)	285106	8.11663e+06	0.0351262
Tajikistan	TJK	Europe & Central Asia	Official multilateral	International Monetary Fund	International Monetary Fund (Official multilateral)	144178	8.11663e+06	0.0177633
Tajikistan	TJK	Europe & Central Asia	Official multilateral	Other multilateral	Other multilateral (Official multilateral)	411435	8.11663e+06	0.0506904
Tajikistan	TJK	Europe & Central Asia	Official multilateral	World Bank-IDA	World Bank-IDA (Official multilateral)	341763	8.11663e+06	0.0421065
Tajikistan	TJK	Europe & Central Asia	Total		(Total)	2974281	8.11663e+06	0.366443
Tajikistan	TJK	Europe & Central Asia	Total Bondholders		(Total Bondholders)	500000	8.11663e+06	0.0616019
Tajikistan	TJK	Europe & Central Asia	Total Non-official		(Total Non-official)	22468	8.11663e+06	0.00276815
Tajikistan	TJK	Europe & Central Asia	Total Official bilateral		(Total Official bilateral)	1269332	8.11663e+06	0.156387
Tajikistan	TJK	Europe & Central Asia	Total Official multilateral		(Total Official multilateral)	1182481	8.11663e+06	0.145686
Tanzania	TZA	Sub-Saharan Africa	Non-official	Austria	Austria (Non-official)	6042	6.31771e+07	9.5636e-05
Tanzania	TZA	Sub-Saharan Africa	Non-official	China	China (Non-official)	33973	6.31771e+07	0.000537743
Tanzania	TZA	Sub-Saharan Africa	Non-official	Denmark	Denmark (Non-official)	53857	6.31771e+07	0.000852477
Tanzania	TZA	Sub-Saharan Africa	Non-official	France	France (Non-official)	1910	6.31771e+07	3.02325e-05
Tanzania	TZA	Sub-Saharan Africa	Non-official	Germany	Germany (Non-official)	7697	6.31771e+07	0.000121832
Tanzania	TZA	Sub-Saharan Africa	Non-official	Hong Kong	Hong Kong (Non-official)	20619	6.31771e+07	0.000326368
Tanzania	TZA	Sub-Saharan Africa	Non-official	Hungary	Hungary (Non-official)	5783	6.31771e+07	9.15364e-05
Tanzania	TZA	Sub-Saharan Africa	Non-official	India	India (Non-official)	1404	6.31771e+07	2.22233e-05
Tanzania	TZA	Sub-Saharan Africa	Non-official	Italy	Italy (Non-official)	1787	6.31771e+07	2.82856e-05
Tanzania	TZA	Sub-Saharan Africa	Non-official	Liberia	Liberia (Non-official)	873	6.31771e+07	1.38183e-05
Tanzania	TZA	Sub-Saharan Africa	Non-official	Multiple lenders	Multiple lenders (Non-official)	1333333	6.31771e+07	0.0211047
Tanzania	TZA	Sub-Saharan Africa	Non-official	Netherlands	Netherlands (Non-official)	4210	6.31771e+07	6.66381e-05
Tanzania	TZA	Sub-Saharan Africa	Non-official	Poland	Poland (Non-official)	6080	6.31771e+07	9.62375e-05
Tanzania	TZA	Sub-Saharan Africa	Non-official	Serbia	Serbia (Non-official)	6675	6.31771e+07	0.000105655
Tanzania	TZA	Sub-Saharan Africa	Non-official	South Africa	South Africa (Non-official)	66666	6.31771e+07	0.00105522
Tanzania	TZA	Sub-Saharan Africa	Non-official	United Kingdom	United Kingdom (Non-official)	250	6.31771e+07	3.95713e-06
Tanzania	TZA	Sub-Saharan Africa	Non-official	United States	United States (Non-official)	3927	6.31771e+07	6.21586e-05
Tanzania	TZA	Sub-Saharan Africa	Official bilateral	Austria	Austria (Official bilateral)	700	6.31771e+07	1.108e-05
Tanzania	TZA	Sub-Saharan Africa	Official bilateral	Belgium	Belgium (Official bilateral)	32463	6.31771e+07	0.000513842
Tanzania	TZA	Sub-Saharan Africa	Official bilateral	China	China (Official bilateral)	553391	6.31771e+07	0.00875937
Tanzania	TZA	Sub-Saharan Africa	Official bilateral	France	France (Official bilateral)	121773	6.31771e+07	0.00192749
Tanzania	TZA	Sub-Saharan Africa	Official bilateral	India	India (Official bilateral)	417316	6.31771e+07	0.0066055
Tanzania	TZA	Sub-Saharan Africa	Official bilateral	Iran, Islamic Republic Of		77729	6.31771e+07	0.00123034
Tanzania	TZA	Sub-Saharan Africa	Official bilateral	Japan	Japan (Official bilateral)	621101	6.31771e+07	0.00983111
Tanzania	TZA	Sub-Saharan Africa	Official bilateral	Kuwait	Kuwait (Official bilateral)	66211	6.31771e+07	0.00104802
Tanzania	TZA	Sub-Saharan Africa	Official bilateral	Libya	Libya (Official bilateral)	61687	6.31771e+07	0.000976414
Tanzania	TZA	Sub-Saharan Africa	Official bilateral	Other bilateral	Other bilateral (Official bilateral)	415545	6.31771e+07	0.00657747
Tanzania	TZA	Sub-Saharan Africa	Official bilateral	Russian Federation	Russian Federation (Official bilateral)	20450	6.31771e+07	0.000323693
Tanzania	TZA	Sub-Saharan Africa	Official bilateral	Saudi Arabia	Saudi Arabia (Official bilateral)	1793	6.31771e+07	2.83806e-05
Tanzania	TZA	Sub-Saharan Africa	Official bilateral	Spain	Spain (Official bilateral)	4567	6.31771e+07	7.22889e-05
Tanzania	TZA	Sub-Saharan Africa	Official bilateral	Sweden	Sweden (Official bilateral)	25343	6.31771e+07	0.000401142
Tanzania	TZA	Sub-Saharan Africa	Official bilateral	United Arab Emirates	United Arab Emirates (Official bilateral)	3982	6.31771e+07	6.30292e-05
Tanzania	TZA	Sub-Saharan Africa	Official bilateral	United Kingdom	United Kingdom (Official bilateral)	963	6.31771e+07	1.52429e-05
Tanzania	TZA	Sub-Saharan Africa	Official multilateral	African Dev. Bank	African Dev. Bank (Official multilateral)	2323401	6.31771e+07	0.036776
Tanzania	TZA	Sub-Saharan Africa	Official multilateral	International Monetary Fund	International Monetary Fund (Official multilateral)	300581	6.31771e+07	0.00475775
Tanzania	TZA	Sub-Saharan Africa	Official multilateral	Other multilateral	Other multilateral (Official multilateral)	456233	6.31771e+07	0.0072215
Tanzania	TZA	Sub-Saharan Africa	Official multilateral	World Bank-IDA	World Bank-IDA (Official multilateral)	7340914	6.31771e+07	0.116196
Tanzania	TZA	Sub-Saharan Africa	Total		(Total)	14401229	6.31771e+07	0.22795
Tanzania	TZA	Sub-Saharan Africa	Total Non-official		(Total Non-official)	1555086	6.31771e+07	0.0246147
Tanzania	TZA	Sub-Saharan Africa	Total Official bilateral		(Total Official bilateral)	2425014	6.31771e+07	0.0383844
Tanzania	TZA	Sub-Saharan Africa	Total Official multilateral		(Total Official multilateral)	10421129	6.31771e+07	0.164951
Timor-Leste	TLS	East Asia & Pacific	Official bilateral	Japan	Japan (Official bilateral)	24899	2.01792e+06	0.0123389
Timor-Leste	TLS	East Asia & Pacific	Official multilateral	Asian Dev. Bank	Asian Dev. Bank (Official multilateral)	123145	2.01792e+06	0.0610256
Timor-Leste	TLS	East Asia & Pacific	Official multilateral	International Monetary Fund	International Monetary Fund (Official multilateral)	10686	2.01792e+06	0.00529554
Timor-Leste	TLS	East Asia & Pacific	Official multilateral	World Bank-IBRD	World Bank-IBRD (Official multilateral)	12072	2.01792e+06	0.00598238
Timor-Leste	TLS	East Asia & Pacific	Official multilateral	World Bank-IDA	World Bank-IDA (Official multilateral)	31101	2.01792e+06	0.0154124
Timor-Leste	TLS	East Asia & Pacific	Total		(Total)	201904	2.01792e+06	0.100055
Timor-Leste	TLS	East Asia & Pacific	Total Official bilateral		(Total Official bilateral)	24899	2.01792e+06	0.0123389
Timor-Leste	TLS	East Asia & Pacific	Total Official multilateral		(Total Official multilateral)	177004	2.01792e+06	0.0877159
Togo	TGO	Sub-Saharan Africa	Non-official	Japan	Japan (Non-official)	116412	5.49027e+06	0.0212033
Togo	TGO	Sub-Saharan Africa	Official bilateral	Belgium	Belgium (Official bilateral)	9981	5.49027e+06	0.00181794
Togo	TGO	Sub-Saharan Africa	Official bilateral	China	China (Official bilateral)	696817	5.49027e+06	0.126918
Togo	TGO	Sub-Saharan Africa	Official bilateral	France	France (Official bilateral)	126	5.49027e+06	2.29497e-05
Togo	TGO	Sub-Saharan Africa	Official bilateral	India	India (Official bilateral)	31863	5.49027e+06	0.00580354
Togo	TGO	Sub-Saharan Africa	Official bilateral	Kuwait	Kuwait (Official bilateral)	38400	5.49027e+06	0.00699419
Togo	TGO	Sub-Saharan Africa	Official bilateral	Saudi Arabia	Saudi Arabia (Official bilateral)	14131	5.49027e+06	0.00257382
Togo	TGO	Sub-Saharan Africa	Official multilateral	African Dev. Bank	African Dev. Bank (Official multilateral)	31497	5.49027e+06	0.00573687
Togo	TGO	Sub-Saharan Africa	Official multilateral	International Monetary Fund	International Monetary Fund (Official multilateral)	318867	5.49027e+06	0.0580785
Togo	TGO	Sub-Saharan Africa	Official multilateral	Other multilateral	Other multilateral (Official multilateral)	456949	5.49027e+06	0.0832288
Togo	TGO	Sub-Saharan Africa	Official multilateral	World Bank-IDA	World Bank-IDA (Official multilateral)	165256	5.49027e+06	0.0300998
Togo	TGO	Sub-Saharan Africa	Total		(Total)	1880299	5.49027e+06	0.342478
Togo	TGO	Sub-Saharan Africa	Total Non-official		(Total Non-official)	116412	5.49027e+06	0.0212033
Togo	TGO	Sub-Saharan Africa	Total Official bilateral		(Total Official bilateral)	791318	5.49027e+06	0.144131
Togo	TGO	Sub-Saharan Africa	Total Official multilateral		(Total Official multilateral)	972569	5.49027e+06	0.177144
Tonga	TON	East Asia & Pacific	Official bilateral	China	China (Official bilateral)	101624	512350	0.198349
Tonga	TON	East Asia & Pacific	Official multilateral	World Bank-IDA	World Bank-IDA (Official multilateral)	42897	512350	0.083726
Tonga	TON	East Asia & Pacific	Official multilateral	Asian Dev. Bank	Asian Dev. Bank (Official multilateral)	29111	512350	0.0568186
Tonga	TON	East Asia & Pacific	Official multilateral	International Monetary Fund	International Monetary Fund (Official multilateral)	9100	512350	0.0177613
Tonga	TON	East Asia & Pacific	Official multilateral	Other multilateral	Other multilateral (Official multilateral)	3751	512350	0.00732117
Tonga	TON	East Asia & Pacific	Total		(Total)	186484	512350	0.363978
Tonga	TON	East Asia & Pacific	Total Official bilateral		(Total Official bilateral)	101624	512350	0.198349
Tonga	TON	East Asia & Pacific	Total Official multilateral		(Total Official multilateral)	84860	512350	0.165629
Uganda	UGA	Sub-Saharan Africa	Non-official	Belgium	Belgium (Non-official)	2387	3.51652e+07	6.78797e-05
Uganda	UGA	Sub-Saharan Africa	Non-official	Germany	Germany (Non-official)	9413	3.51652e+07	0.00026768
Uganda	UGA	Sub-Saharan Africa	Non-official	United Kingdom	United Kingdom (Non-official)	71546	3.51652e+07	0.00203457
Uganda	UGA	Sub-Saharan Africa	Official bilateral	Austria	Austria (Official bilateral)	3567	3.51652e+07	0.000101436
Uganda	UGA	Sub-Saharan Africa	Official bilateral	China	China (Official bilateral)	2149183	3.51652e+07	0.0611168
Uganda	UGA	Sub-Saharan Africa	Official bilateral	France	France (Official bilateral)	145382	3.51652e+07	0.00413426
Uganda	UGA	Sub-Saharan Africa	Official bilateral	Japan	Japan (Official bilateral)	307276	3.51652e+07	0.00873808
Uganda	UGA	Sub-Saharan Africa	Official bilateral	Kuwait	Kuwait (Official bilateral)	34681	3.51652e+07	0.000986232
Uganda	UGA	Sub-Saharan Africa	Official bilateral	Nigeria	Nigeria (Official bilateral)	9000	3.51652e+07	0.000255935
Uganda	UGA	Sub-Saharan Africa	Official bilateral	Other bilateral	Other bilateral (Official bilateral)	60610	3.51652e+07	0.00172358
Uganda	UGA	Sub-Saharan Africa	Official bilateral	Saudi Arabia	Saudi Arabia (Official bilateral)	34917	3.51652e+07	0.000992943
Uganda	UGA	Sub-Saharan Africa	Official bilateral	United Arab Emirates	United Arab Emirates (Official bilateral)	3848	3.51652e+07	0.000109426
Uganda	UGA	Sub-Saharan Africa	Official bilateral	United Kingdom	United Kingdom (Official bilateral)	152394	3.51652e+07	0.00433366
Uganda	UGA	Sub-Saharan Africa	Official multilateral	African Dev. Bank	African Dev. Bank (Official multilateral)	1460202	3.51652e+07	0.0415241
Uganda	UGA	Sub-Saharan Africa	Official multilateral	International Monetary Fund	International Monetary Fund (Official multilateral)	239312	3.51652e+07	0.00680537
Uganda	UGA	Sub-Saharan Africa	Official multilateral	Other multilateral	Other multilateral (Official multilateral)	750695	3.51652e+07	0.0213477
Uganda	UGA	Sub-Saharan Africa	Official multilateral	World Bank-IDA	World Bank-IDA (Official multilateral)	3442560	3.51652e+07	0.0978969
Uganda	UGA	Sub-Saharan Africa	Total		(Total)	8876973	3.51652e+07	0.252437
Uganda	UGA	Sub-Saharan Africa	Total Non-official		(Total Non-official)	83346	3.51652e+07	0.00237013
Uganda	UGA	Sub-Saharan Africa	Total Official bilateral		(Total Official bilateral)	2900858	3.51652e+07	0.0824924
Uganda	UGA	Sub-Saharan Africa	Total Official multilateral		(Total Official multilateral)	5892769	3.51652e+07	0.167574
Uzbekistan	UZB	Europe & Central Asia	Non-official	France	France (Non-official)	641	5.79213e+07	1.10667e-05
Uzbekistan	UZB	Europe & Central Asia	Non-official	China		86000	5.79213e+07	0.00148477
Uzbekistan	UZB	Europe & Central Asia	Non-official	Germany	Germany (Non-official)	78159	5.79213e+07	0.0013494
Uzbekistan	UZB	Europe & Central Asia	Non-official	Japan		12738	5.79213e+07	0.000219919
Uzbekistan	UZB	Europe & Central Asia	Non-official	Spain	Spain (Non-official)	53524	5.79213e+07	0.000924082
Uzbekistan	UZB	Europe & Central Asia	Official bilateral	Belgium	Belgium (Official bilateral)	3595	5.79213e+07	6.2067e-05
Uzbekistan	UZB	Europe & Central Asia	Official bilateral	China	China (Official bilateral)	1872136	5.79213e+07	0.0323221
Uzbekistan	UZB	Europe & Central Asia	Official bilateral	France	France (Official bilateral)	194198	5.79213e+07	0.00335279
Uzbekistan	UZB	Europe & Central Asia	Official bilateral	Germany	Germany (Official bilateral)	135872	5.79213e+07	0.0023458
Uzbekistan	UZB	Europe & Central Asia	Official bilateral	Japan	Japan (Official bilateral)	1904738	5.79213e+07	0.0328849
Uzbekistan	UZB	Europe & Central Asia	Official bilateral	Kuwait	Kuwait (Official bilateral)	44389	5.79213e+07	0.000766368
Uzbekistan	UZB	Europe & Central Asia	Official bilateral	Russian Federation		23509	5.79213e+07	0.000405878
Uzbekistan	UZB	Europe & Central Asia	Official bilateral	Other bilateral	Other bilateral (Official bilateral)	140985	5.79213e+07	0.00243408
Uzbekistan	UZB	Europe & Central Asia	Official bilateral	Saudi Arabia	Saudi Arabia (Official bilateral)	131058	5.79213e+07	0.00226269
Uzbekistan	UZB	Europe & Central Asia	Official bilateral	Spain	Spain (Official bilateral)	27864	5.79213e+07	0.000481067
Uzbekistan	UZB	Europe & Central Asia	Official bilateral	United Arab Emirates		5001	5.79213e+07	8.63413e-05
Uzbekistan	UZB	Europe & Central Asia	Official bilateral	United States	United States (Official bilateral)	26661	5.79213e+07	0.000460297
Uzbekistan	UZB	Europe & Central Asia	Official multilateral	Asian Dev. Bank	Asian Dev. Bank (Official multilateral)	3877154	5.79213e+07	0.0669383
Uzbekistan	UZB	Europe & Central Asia	Official multilateral	International Monetary Fund	International Monetary Fund (Official multilateral)	363393	5.79213e+07	0.00627391
Uzbekistan	UZB	Europe & Central Asia	Official multilateral	Other multilateral	Other multilateral (Official multilateral)	448252	5.79213e+07	0.00773899
Uzbekistan	UZB	Europe & Central Asia	Official multilateral	World Bank-IBRD	World Bank-IBRD (Official multilateral)	1321990	5.79213e+07	0.0228239
Uzbekistan	UZB	Europe & Central Asia	Official multilateral	World Bank-IDA	World Bank-IDA (Official multilateral)	1401315	5.79213e+07	0.0241934
Uzbekistan	UZB	Europe & Central Asia	Total		(Total)	11789779	5.79213e+07	0.203548
Uzbekistan	UZB	Europe & Central Asia	Total Non-official		(Total Non-official)	231064	5.79213e+07	0.00398928
Uzbekistan	UZB	Europe & Central Asia	Total Official bilateral		(Total Official bilateral)	4510004	5.79213e+07	0.0778644
Uzbekistan	UZB	Europe & Central Asia	Total Official multilateral		(Total Official multilateral)	7412104	5.79213e+07	0.127969
Vanuatu	VUT	East Asia & Pacific	Official bilateral	China	China (Official bilateral)	130770	934240	0.139975
Vanuatu	VUT	East Asia & Pacific	Official bilateral	Japan	Japan (Official bilateral)	75532	934240	0.0808486
Vanuatu	VUT	East Asia & Pacific	Official multilateral	Asian Dev. Bank	Asian Dev. Bank (Official multilateral)	52041	934240	0.0557041
Vanuatu	VUT	East Asia & Pacific	Official multilateral	International Monetary Fund	International Monetary Fund (Official multilateral)	37187	934240	0.0398045
Vanuatu	VUT	East Asia & Pacific	Official multilateral	World Bank-IDA	World Bank-IDA (Official multilateral)	82984	934240	0.0888251
Vanuatu	VUT	East Asia & Pacific	Total		(Total)	378513	934240	0.405156
Vanuatu	VUT	East Asia & Pacific	Total Official bilateral		(Total Official bilateral)	206302	934240	0.220823
Vanuatu	VUT	East Asia & Pacific	Total Official multilateral		(Total Official multilateral)	172212	934240	0.184334
Yemen, Rep.	YEM	Middle East & North Africa	Official bilateral	China	China (Official bilateral)	152135	2.25811e+07	0.00673728
Yemen, Rep.	YEM	Middle East & North Africa	Official bilateral	Denmark		1682	2.25811e+07	7.44871e-05
Yemen, Rep.	YEM	Middle East & North Africa	Official bilateral	France	France (Official bilateral)	65375	2.25811e+07	0.00289512
Yemen, Rep.	YEM	Middle East & North Africa	Official bilateral	Germany	Germany (Official bilateral)	803	2.25811e+07	3.55607e-05
Yemen, Rep.	YEM	Middle East & North Africa	Official bilateral	Italy	Italy (Official bilateral)	40590	2.25811e+07	0.00179752
Yemen, Rep.	YEM	Middle East & North Africa	Official bilateral	Japan	Japan (Official bilateral)	217934	2.25811e+07	0.00965118
Yemen, Rep.	YEM	Middle East & North Africa	Official bilateral	Kuwait	Kuwait (Official bilateral)	177573	2.25811e+07	0.0078638
Yemen, Rep.	YEM	Middle East & North Africa	Official bilateral	Netherlands	Netherlands (Official bilateral)	1238	2.25811e+07	5.48247e-05
Yemen, Rep.	YEM	Middle East & North Africa	Official bilateral	Russian Federation		1096861	2.25811e+07	0.0485743
Yemen, Rep.	YEM	Middle East & North Africa	Official bilateral	Other bilateral	Other bilateral (Official bilateral)	35034	2.25811e+07	0.00155148
Yemen, Rep.	YEM	Middle East & North Africa	Official bilateral	Saudi Arabia	Saudi Arabia (Official bilateral)	1300820	2.25811e+07	0.0576066
Yemen, Rep.	YEM	Middle East & North Africa	Official bilateral	Spain	Spain (Official bilateral)	16048	2.25811e+07	0.000710683
Yemen, Rep.	YEM	Middle East & North Africa	Official bilateral	United States	United States (Official bilateral)	95085	2.25811e+07	0.00421083
Yemen, Rep.	YEM	Middle East & North Africa	Official multilateral	International Monetary Fund	International Monetary Fund (Official multilateral)	440288	2.25811e+07	0.0194981
Yemen, Rep.	YEM	Middle East & North Africa	Official multilateral	Other multilateral	Other multilateral (Official multilateral)	1482187	2.25811e+07	0.0656384
Yemen, Rep.	YEM	Middle East & North Africa	Official multilateral	World Bank-IDA	World Bank-IDA (Official multilateral)	1504667	2.25811e+07	0.066634
Yemen, Rep.	YEM	Middle East & North Africa	Total		(Total)	6628321	2.25811e+07	0.293534
Yemen, Rep.	YEM	Middle East & North Africa	Total Official bilateral		(Total Official bilateral)	3201179	2.25811e+07	0.141764
Yemen, Rep.	YEM	Middle East & North Africa	Total Official multilateral		(Total Official multilateral)	3427142	2.25811e+07	0.15177
Zambia	ZMB	Sub-Saharan Africa	Bondholders	Bond market	Bond market (Bondholders)	3000000	2.33098e+07	0.128701
Zambia	ZMB	Sub-Saharan Africa	Non-official	China	China (Non-official)	435987	2.33098e+07	0.018704
Zambia	ZMB	Sub-Saharan Africa	Non-official	Denmark	Denmark (Non-official)	41715	2.33098e+07	0.00178959
Zambia	ZMB	Sub-Saharan Africa	Non-official	Hong Kong		44783	2.33098e+07	0.00192121
Zambia	ZMB	Sub-Saharan Africa	Non-official	Israel	Israel (Non-official)	344788	2.33098e+07	0.0147916
Zambia	ZMB	Sub-Saharan Africa	Non-official	Italy	Italy (Non-official)	100268	2.33098e+07	0.00430154
Zambia	ZMB	Sub-Saharan Africa	Non-official	South Africa	South Africa (Non-official)	35420	2.33098e+07	0.00151953
Zambia	ZMB	Sub-Saharan Africa	Non-official	United Kingdom	United Kingdom (Non-official)	1351110	2.33098e+07	0.0579632
Zambia	ZMB	Sub-Saharan Africa	Non-official	United States		48853	2.33098e+07	0.00209582
Zambia	ZMB	Sub-Saharan Africa	Official bilateral	China	China (Official bilateral)	2984232	2.33098e+07	0.128025
Zambia	ZMB	Sub-Saharan Africa	Official bilateral	France	France (Official bilateral)	44074	2.33098e+07	0.00189079
Zambia	ZMB	Sub-Saharan Africa	Official bilateral	India	India (Official bilateral)	180767	2.33098e+07	0.00775499
Zambia	ZMB	Sub-Saharan Africa	Official bilateral	Japan	Japan (Official bilateral)	48598	2.33098e+07	0.00208488
Zambia	ZMB	Sub-Saharan Africa	Official bilateral	Kuwait	Kuwait (Official bilateral)	505	2.33098e+07	2.16647e-05
Zambia	ZMB	Sub-Saharan Africa	Official bilateral	Russian Federation		145586	2.33098e+07	0.00624571
Zambia	ZMB	Sub-Saharan Africa	Official bilateral	Saudi Arabia		12764	2.33098e+07	0.000547581
Zambia	ZMB	Sub-Saharan Africa	Official bilateral	Other bilateral	Other bilateral (Official bilateral)	167193	2.33098e+07	0.00717266
Zambia	ZMB	Sub-Saharan Africa	Official multilateral	African Dev. Bank	African Dev. Bank (Official multilateral)	599003	2.33098e+07	0.0256975
Zambia	ZMB	Sub-Saharan Africa	Official multilateral	International Monetary Fund	International Monetary Fund (Official multilateral)	666541	2.33098e+07	0.0285949
Zambia	ZMB	Sub-Saharan Africa	Official multilateral	Other multilateral	Other multilateral (Official multilateral)	409969	2.33098e+07	0.0175879
Zambia	ZMB	Sub-Saharan Africa	Official multilateral	World Bank-IDA	World Bank-IDA (Official multilateral)	1108251	2.33098e+07	0.0475445
Zambia	ZMB	Sub-Saharan Africa	Total		(Total)	11770407	2.33098e+07	0.504956
Zambia	ZMB	Sub-Saharan Africa	Total Bondholders		(Total Bondholders)	3000000	2.33098e+07	0.128701
Zambia	ZMB	Sub-Saharan Africa	Total Non-official		(Total Non-official)	2402924	2.33098e+07	0.103087
Zambia	ZMB	Sub-Saharan Africa	Total Official bilateral		(Total Official bilateral)	3583719	2.33098e+07	0.153743
Zambia	ZMB	Sub-Saharan Africa	Total Official multilateral		(Total Official multilateral)	2783764	2.33098e+07	0.119425

## Sheet: Sheet1
Debtor	Code	Region	Creditor Type	Creditor	Creditor-new	Debt Oustanding (th $)	GDP in 2019	Debt to GDP
Afghanistan	AFG	South Asia	Official bilateral	Russian Federation	Russian Federation (Official bilateral)	849119	1.92911e+07	0.0440161
Afghanistan	AFG	South Asia	Official multilateral	Asian Dev. Bank	Asian Dev. Bank (Official multilateral)	573753	1.92911e+07	0.0297418
Afghanistan	AFG	South Asia	Official multilateral	World Bank-IDA	World Bank-IDA (Official multilateral)	338272	1.92911e+07	0.0175351
Afghanistan	AFG	South Asia	Official multilateral	International Monetary Fund	International Monetary Fund (Official multilateral)	276923	1.92911e+07	0.014355
Afghanistan	AFG	South Asia	Official bilateral	Saudi Arabia	Saudi Arabia (Official bilateral)	79377	1.92911e+07	0.00411469
Afghanistan	AFG	South Asia	Official bilateral	Italy	Italy (Official bilateral)	23928	1.92911e+07	0.00124036
Afghanistan	AFG	South Asia	Official bilateral	Kuwait	Kuwait (Official bilateral)	22722	1.92911e+07	0.00117785
Afghanistan	AFG	South Asia	Official bilateral	Iran, Islamic Republic Of	Iran, Islamic Republic Of (Official bilateral)	9139	1.92911e+07	0.000473742
Angola	AGO	Sub-Saharan Africa	Official bilateral	China	China (Official bilateral)	15047785	8.88157e+07	0.169427
Angola	AGO	Sub-Saharan Africa	Official multilateral	International Monetary Fund	International Monetary Fund (Official multilateral)	1861296	8.88157e+07	0.0209568
Angola	AGO	Sub-Saharan Africa	Official multilateral	African Dev. Bank	African Dev. Bank (Official multilateral)	1196016	8.88157e+07	0.0134663
Angola	AGO	Sub-Saharan Africa	Official multilateral	World Bank-IBRD	World Bank-IBRD (Official multilateral)	1109047	8.88157e+07	0.0124871
Angola	AGO	Sub-Saharan Africa	Non-official	United Kingdom	United Kingdom (Non-official)	698880	8.88157e+07	0.00786888
Angola	AGO	Sub-Saharan Africa	Non-official	China	China (Non-official)	676905	8.88157e+07	0.00762146
Angola	AGO	Sub-Saharan Africa	Official multilateral	World Bank-IDA	World Bank-IDA (Official multilateral)	526778	8.88157e+07	0.00593114
Angola	AGO	Sub-Saharan Africa	Non-official	Israel	Israel (Non-official)	500671	8.88157e+07	0.00563719
Angola	AGO	Sub-Saharan Africa	Official bilateral	Japan	Japan (Official bilateral)	468515	8.88157e+07	0.00527514
Angola	AGO	Sub-Saharan Africa	Bondholders	Bond market	Bond market (Bondholders)	462190	8.88157e+07	0.00520392
Angola	AGO	Sub-Saharan Africa	Official bilateral	Portugal	Portugal (Official bilateral)	391014	8.88157e+07	0.00440253
Angola	AGO	Sub-Saharan Africa	Non-official	Netherlands	Netherlands (Non-official)	351061	8.88157e+07	0.00395269
Angola	AGO	Sub-Saharan Africa	Official bilateral	Canada	Canada (Official bilateral)	346146	8.88157e+07	0.00389735
Angola	AGO	Sub-Saharan Africa	Non-official	Portugal	Portugal (Non-official)	322676	8.88157e+07	0.0036331
Angola	AGO	Sub-Saharan Africa	Non-official	Ireland	Ireland (Non-official)	206691	8.88157e+07	0.00232719
Angola	AGO	Sub-Saharan Africa	Non-official	France	France (Non-official)	135948	8.88157e+07	0.00153068
Angola	AGO	Sub-Saharan Africa	Non-official	Canada	Canada (Non-official)	121975	8.88157e+07	0.00137335
Angola	AGO	Sub-Saharan Africa	Non-official	Italy	Italy (Non-official)	75844	8.88157e+07	0.000853948
Angola	AGO	Sub-Saharan Africa	Non-official	Germany	Germany (Non-official)	69818	8.88157e+07	0.0007861
Angola	AGO	Sub-Saharan Africa	Official bilateral	Spain	Spain (Official bilateral)	37595	8.88157e+07	0.000423292
Angola	AGO	Sub-Saharan Africa	Non-official	Belgium	Belgium (Non-official)	37502	8.88157e+07	0.000422245
Angola	AGO	Sub-Saharan Africa	Official bilateral	India	India (Official bilateral)	36402	8.88157e+07	0.00040986
Angola	AGO	Sub-Saharan Africa	Official bilateral	Italy	Italy (Official bilateral)	18862	8.88157e+07	0.000212372
Angola	AGO	Sub-Saharan Africa	Official bilateral	United States	United States (Official bilateral)	13130	8.88157e+07	0.000147834
Angola	AGO	Sub-Saharan Africa	Official bilateral	Netherlands	Netherlands (Official bilateral)	2982	8.88157e+07	3.35751e-05
Angola	AGO	Sub-Saharan Africa	Official bilateral	Belgium	Belgium (Official bilateral)	66	8.88157e+07	7.43112e-07
Bangladesh	BGD	South Asia	Official multilateral	World Bank-IDA	World Bank-IDA (Official multilateral)	15788308	3.02571e+08	0.0521805
Bangladesh	BGD	South Asia	Official multilateral	Asian Dev. Bank	Asian Dev. Bank (Official multilateral)	9950834	3.02571e+08	0.0328876
Bangladesh	BGD	South Asia	Official bilateral	Japan	Japan (Official bilateral)	6227868	3.02571e+08	0.0205831
Bangladesh	BGD	South Asia	Official bilateral	China	China (Official bilateral)	3599643	3.02571e+08	0.0118968
Bangladesh	BGD	South Asia	Official multilateral	International Monetary Fund	International Monetary Fund (Official multilateral)	1413764	3.02571e+08	0.0046725
Bangladesh	BGD	South Asia	Official bilateral	India	India (Official bilateral)	530262	3.02571e+08	0.00175252
Bangladesh	BGD	South Asia	Official bilateral	Kuwait	Kuwait (Official bilateral)	157495	3.02571e+08	0.000520522
Bangladesh	BGD	South Asia	Official bilateral	France	France (Official bilateral)	147819	3.02571e+08	0.000488543
Bangladesh	BGD	South Asia	Official bilateral	Saudi Arabia	Saudi Arabia (Official bilateral)	119483	3.02571e+08	0.000394892
Bangladesh	BGD	South Asia	Official bilateral	United Arab Emirates	United Arab Emirates (Official bilateral)	48035	3.02571e+08	0.000158756
Bangladesh	BGD	South Asia	Official bilateral	Germany	Germany (Official bilateral)	22411	3.02571e+08	7.40685e-05
Bangladesh	BGD	South Asia	Non-official	Denmark	Denmark (Non-official)	18618	3.02571e+08	6.15326e-05
Bangladesh	BGD	South Asia	Official bilateral	Spain	Spain (Official bilateral)	1122	3.02571e+08	3.70822e-06
Bangladesh	BGD	South Asia	Official bilateral	Belgium	Belgium (Official bilateral)	418	3.02571e+08	1.38149e-06
Bangladesh	BGD	South Asia	Official bilateral	United States	United States (Official bilateral)	324	3.02571e+08	1.07082e-06
Bangladesh	BGD	South Asia	Official bilateral	Switzerland	Switzerland (Official bilateral)	78	3.02571e+08	2.57791e-07
Benin	BEN	Sub-Saharan Africa	Official multilateral	World Bank-IDA	World Bank-IDA (Official multilateral)	1081787	1.43907e+07	0.0751726
Benin	BEN	Sub-Saharan Africa	Official multilateral	African Dev. Bank	African Dev. Bank (Official multilateral)	447254	1.43907e+07	0.0310794
Benin	BEN	Sub-Saharan Africa	Official bilateral	China	China (Official bilateral)	302101	1.43907e+07	0.0209928
Benin	BEN	Sub-Saharan Africa	Non-official	United Kingdom	United Kingdom (Non-official)	292084	1.43907e+07	0.0202967
Benin	BEN	Sub-Saharan Africa	Official multilateral	International Monetary Fund	International Monetary Fund (Official multilateral)	266700	1.43907e+07	0.0185328
Benin	BEN	Sub-Saharan Africa	Non-official	Netherlands	Netherlands (Non-official)	125761	1.43907e+07	0.00873904
Benin	BEN	Sub-Saharan Africa	Non-official	Germany	Germany (Non-official)	89888	1.43907e+07	0.00624625
Benin	BEN	Sub-Saharan Africa	Official bilateral	Kuwait	Kuwait (Official bilateral)	46062	1.43907e+07	0.00320082
Benin	BEN	Sub-Saharan Africa	Official bilateral	Saudi Arabia	Saudi Arabia (Official bilateral)	38092	1.43907e+07	0.00264699
Benin	BEN	Sub-Saharan Africa	Official bilateral	India	India (Official bilateral)	23254	1.43907e+07	0.0016159
Benin	BEN	Sub-Saharan Africa	Official bilateral	France	France (Official bilateral)	21630	1.43907e+07	0.00150305
Benin	BEN	Sub-Saharan Africa	Official bilateral	Brazil	Brazil (Official bilateral)	4484	1.43907e+07	0.00031159
Benin	BEN	Sub-Saharan Africa	Official bilateral	United Arab Emirates	United Arab Emirates (Official bilateral)	3514	1.43907e+07	0.000244185
Bhutan	BTN	South Asia	Official bilateral	India	India (Official bilateral)	1882902	2.53055e+06	0.744069
Bhutan	BTN	South Asia	Official multilateral	Asian Dev. Bank	Asian Dev. Bank (Official multilateral)	326197	2.53055e+06	0.128904
Bhutan	BTN	South Asia	Official multilateral	World Bank-IDA	World Bank-IDA (Official multilateral)	270948	2.53055e+06	0.107071
Bhutan	BTN	South Asia	Official bilateral	Japan	Japan (Official bilateral)	41780	2.53055e+06	0.0165103
Bhutan	BTN	South Asia	Non-official	Austria	Austria (Non-official)	24262	2.53055e+06	0.00958765
Bhutan	BTN	South Asia	Official bilateral	Austria	Austria (Official bilateral)	21129	2.53055e+06	0.00834958
Bhutan	BTN	South Asia	Official multilateral	International Monetary Fund	International Monetary Fund (Official multilateral)	8282	2.53055e+06	0.00327281
Burkina Faso	BFA	Sub-Saharan Africa	Official multilateral	World Bank-IDA	World Bank-IDA (Official multilateral)	1672631	1.59908e+07	0.1046
Burkina Faso	BFA	Sub-Saharan Africa	Official multilateral	African Dev. Bank	African Dev. Bank (Official multilateral)	559672	1.59908e+07	0.0349996
Burkina Faso	BFA	Sub-Saharan Africa	Official multilateral	International Monetary Fund	International Monetary Fund (Official multilateral)	309646	1.59908e+07	0.019364
Burkina Faso	BFA	Sub-Saharan Africa	Official bilateral	France	France (Official bilateral)	88951	1.59908e+07	0.00556263
Burkina Faso	BFA	Sub-Saharan Africa	Official bilateral	Kuwait	Kuwait (Official bilateral)	59363	1.59908e+07	0.00371232
Burkina Faso	BFA	Sub-Saharan Africa	Official bilateral	China	China (Official bilateral)	57116	1.59908e+07	0.0035718
Burkina Faso	BFA	Sub-Saharan Africa	Official bilateral	Saudi Arabia	Saudi Arabia (Official bilateral)	43409	1.59908e+07	0.00271462
Burkina Faso	BFA	Sub-Saharan Africa	Official bilateral	India	India (Official bilateral)	14428	1.59908e+07	0.000902269
Burkina Faso	BFA	Sub-Saharan Africa	Official bilateral	Libya	Libya (Official bilateral)	6919	1.59908e+07	0.000432686
Burkina Faso	BFA	Sub-Saharan Africa	Official bilateral	Belgium	Belgium (Official bilateral)	6343	1.59908e+07	0.000396665
Burkina Faso	BFA	Sub-Saharan Africa	Official bilateral	United Arab Emirates	United Arab Emirates (Official bilateral)	431	1.59908e+07	2.6953e-05
Burundi	BDI	Sub-Saharan Africa	Official multilateral	International Monetary Fund	International Monetary Fund (Official multilateral)	149136	3.01233e+06	0.0495084
Burundi	BDI	Sub-Saharan Africa	Official multilateral	World Bank-IDA	World Bank-IDA (Official multilateral)	137531	3.01233e+06	0.0456559
Burundi	BDI	Sub-Saharan Africa	Official bilateral	India	India (Official bilateral)	36691	3.01233e+06	0.0121803
Burundi	BDI	Sub-Saharan Africa	Official bilateral	Saudi Arabia	Saudi Arabia (Official bilateral)	33186	3.01233e+06	0.0110167
Burundi	BDI	Sub-Saharan Africa	Official multilateral	African Dev. Bank	African Dev. Bank (Official multilateral)	31033	3.01233e+06	0.010302
Burundi	BDI	Sub-Saharan Africa	Official bilateral	Kuwait	Kuwait (Official bilateral)	21439	3.01233e+06	0.00711707
Burundi	BDI	Sub-Saharan Africa	Official bilateral	China	China (Official bilateral)	13907	3.01233e+06	0.00461668
Burundi	BDI	Sub-Saharan Africa	Official bilateral	Libya	Libya (Official bilateral)	4375	3.01233e+06	0.00145236
Burundi	BDI	Sub-Saharan Africa	Official bilateral	United Arab Emirates	United Arab Emirates (Official bilateral)	823	3.01233e+06	0.00027321
Cabo Verde	CPV	Sub-Saharan Africa	Non-official	Portugal	Portugal (Non-official)	504514	1.98185e+06	0.254568
Cabo Verde	CPV	Sub-Saharan Africa	Official multilateral	World Bank-IDA	World Bank-IDA (Official multilateral)	366347	1.98185e+06	0.184851
Cabo Verde	CPV	Sub-Saharan Africa	Official multilateral	African Dev. Bank	African Dev. Bank (Official multilateral)	324703	1.98185e+06	0.163839
Cabo Verde	CPV	Sub-Saharan Africa	Official bilateral	Portugal	Portugal (Official bilateral)	155495	1.98185e+06	0.0784597
Cabo Verde	CPV	Sub-Saharan Africa	Official bilateral	Japan	Japan (Official bilateral)	92275	1.98185e+06	0.0465601
Cabo Verde	CPV	Sub-Saharan Africa	Official bilateral	France	France (Official bilateral)	53319	1.98185e+06	0.0269037
Cabo Verde	CPV	Sub-Saharan Africa	Official bilateral	Spain	Spain (Official bilateral)	43816	1.98185e+06	0.0221087
Cabo Verde	CPV	Sub-Saharan Africa	Official multilateral	World Bank-IBRD	World Bank-IBRD (Official multilateral)	39754	1.98185e+06	0.0200591
Cabo Verde	CPV	Sub-Saharan Africa	Official bilateral	China	China (Official bilateral)	30179	1.98185e+06	0.0152277
Cabo Verde	CPV	Sub-Saharan Africa	Official bilateral	Saudi Arabia	Saudi Arabia (Official bilateral)	19041	1.98185e+06	0.00960771
Cabo Verde	CPV	Sub-Saharan Africa	Official multilateral	International Monetary Fund	International Monetary Fund (Official multilateral)	12679	1.98185e+06	0.00639757
Cabo Verde	CPV	Sub-Saharan Africa	Official bilateral	Kuwait	Kuwait (Official bilateral)	12651	1.98185e+06	0.00638344
Cabo Verde	CPV	Sub-Saharan Africa	Official bilateral	Austria	Austria (Official bilateral)	11663	1.98185e+06	0.00588492
Cabo Verde	CPV	Sub-Saharan Africa	Official bilateral	Belgium	Belgium (Official bilateral)	610	1.98185e+06	0.000307794
Cambodia	KHM	East Asia & Pacific	Official bilateral	China	China (Official bilateral)	3608596	2.70894e+07	0.133211
Cambodia	KHM	East Asia & Pacific	Official multilateral	Asian Dev. Bank	Asian Dev. Bank (Official multilateral)	1404424	2.70894e+07	0.0518441
Cambodia	KHM	East Asia & Pacific	Official multilateral	World Bank-IDA	World Bank-IDA (Official multilateral)	584540	2.70894e+07	0.0215782
Cambodia	KHM	East Asia & Pacific	Official bilateral	Russian Federation	Russian Federation (Official bilateral)	457776	2.70894e+07	0.0168987
Cambodia	KHM	East Asia & Pacific	Official bilateral	Japan	Japan (Official bilateral)	407084	2.70894e+07	0.0150274
Cambodia	KHM	East Asia & Pacific	Official bilateral	France	France (Official bilateral)	337209	2.70894e+07	0.012448
Cambodia	KHM	East Asia & Pacific	Official bilateral	United States	United States (Official bilateral)	162269	2.70894e+07	0.00599013
Cambodia	KHM	East Asia & Pacific	Official multilateral	International Monetary Fund	International Monetary Fund (Official multilateral)	116047	2.70894e+07	0.00428385
Cambodia	KHM	East Asia & Pacific	Official bilateral	Thailand	Thailand (Official bilateral)	53881	2.70894e+07	0.00198901
Cambodia	KHM	East Asia & Pacific	Official bilateral	India	India (Official bilateral)	30226	2.70894e+07	0.00111579
Cambodia	KHM	East Asia & Pacific	Official bilateral	Germany	Germany (Official bilateral)	943	2.70894e+07	3.48107e-05
Cameroon	CMR	Sub-Saharan Africa	Official bilateral	China	China (Official bilateral)	3448534	3.90074e+07	0.0884073
Cameroon	CMR	Sub-Saharan Africa	Official multilateral	World Bank-IDA	World Bank-IDA (Official multilateral)	1480985	3.90074e+07	0.0379668
Cameroon	CMR	Sub-Saharan Africa	Official multilateral	African Dev. Bank	African Dev. Bank (Official multilateral)	1142293	3.90074e+07	0.029284
Cameroon	CMR	Sub-Saharan Africa	Official bilateral	France	France (Official bilateral)	1123206	3.90074e+07	0.0287947
Cameroon	CMR	Sub-Saharan Africa	Official multilateral	International Monetary Fund	International Monetary Fund (Official multilateral)	760370	3.90074e+07	0.019493
Cameroon	CMR	Sub-Saharan Africa	Bondholders	Bond market	Bond market (Bondholders)	686562	3.90074e+07	0.0176008
Cameroon	CMR	Sub-Saharan Africa	Official multilateral	World Bank-IBRD	World Bank-IBRD (Official multilateral)	251860	3.90074e+07	0.00645673
Cameroon	CMR	Sub-Saharan Africa	Non-official	United Kingdom	United Kingdom (Non-official)	209023	3.90074e+07	0.00535855
Cameroon	CMR	Sub-Saharan Africa	Official bilateral	Turkey	Turkey (Official bilateral)	183298	3.90074e+07	0.00469906
Cameroon	CMR	Sub-Saharan Africa	Non-official	China	China (Non-official)	178080	3.90074e+07	0.00456529
Cameroon	CMR	Sub-Saharan Africa	Official bilateral	United States	United States (Official bilateral)	122100	3.90074e+07	0.00313018
Cameroon	CMR	Sub-Saharan Africa	Official bilateral	Japan	Japan (Official bilateral)	86684	3.90074e+07	0.00222225
Cameroon	CMR	Sub-Saharan Africa	Non-official	Switzerland	Switzerland (Non-official)	84881	3.90074e+07	0.00217603
Cameroon	CMR	Sub-Saharan Africa	Official bilateral	Norway	Norway (Official bilateral)	56783	3.90074e+07	0.0014557
Cameroon	CMR	Sub-Saharan Africa	Non-official	Belgium	Belgium (Non-official)	55872	3.90074e+07	0.00143235
Cameroon	CMR	Sub-Saharan Africa	Official bilateral	India	India (Official bilateral)	50922	3.90074e+07	0.00130545
Cameroon	CMR	Sub-Saharan Africa	Non-official	Multiple lenders	Multiple lenders (Non-official)	45862	3.90074e+07	0.00117573
Cameroon	CMR	Sub-Saharan Africa	Non-official	Germany	Germany (Non-official)	40744	3.90074e+07	0.00104452
Cameroon	CMR	Sub-Saharan Africa	Official bilateral	Germany	Germany (Official bilateral)	28364	3.90074e+07	0.000727145
Cameroon	CMR	Sub-Saharan Africa	Official bilateral	Kuwait	Kuwait (Official bilateral)	20795	3.90074e+07	0.000533105
Cameroon	CMR	Sub-Saharan Africa	Official bilateral	Belgium	Belgium (Official bilateral)	15583	3.90074e+07	0.000399489
Cameroon	CMR	Sub-Saharan Africa	Official bilateral	Saudi Arabia	Saudi Arabia (Official bilateral)	10850	3.90074e+07	0.000278153
Cameroon	CMR	Sub-Saharan Africa	Non-official	Austria	Austria (Non-official)	10111	3.90074e+07	0.000259208
Cameroon	CMR	Sub-Saharan Africa	Non-official	France	France (Non-official)	6664	3.90074e+07	0.00017084
Cameroon	CMR	Sub-Saharan Africa	Official bilateral	Spain	Spain (Official bilateral)	6361	3.90074e+07	0.000163072
Cameroon	CMR	Sub-Saharan Africa	Non-official	United Arab Emirates	United Arab Emirates (Non-official)	2107	3.90074e+07	5.40155e-05
Cameroon	CMR	Sub-Saharan Africa	Non-official	Spain	Spain (Non-official)	1220	3.90074e+07	3.12762e-05
Central African Republic	CAF	Sub-Saharan Africa	Official multilateral	International Monetary Fund	International Monetary Fund (Official multilateral)	296485	2.22031e+06	0.133533
Central African Republic	CAF	Sub-Saharan Africa	Official multilateral	World Bank-IDA	World Bank-IDA (Official multilateral)	106956	2.22031e+06	0.0481717
Central African Republic	CAF	Sub-Saharan Africa	Official bilateral	India	India (Official bilateral)	82368	2.22031e+06	0.0370976
Central African Republic	CAF	Sub-Saharan Africa	Official bilateral	China	China (Official bilateral)	42160	2.22031e+06	0.0189884
Central African Republic	CAF	Sub-Saharan Africa	Official bilateral	Saudi Arabia	Saudi Arabia (Official bilateral)	31799	2.22031e+06	0.0143219
Central African Republic	CAF	Sub-Saharan Africa	Non-official	Serbia	Serbia (Non-official)	23576	2.22031e+06	0.0106183
Central African Republic	CAF	Sub-Saharan Africa	Official bilateral	Kuwait	Kuwait (Official bilateral)	20683	2.22031e+06	0.00931538
Central African Republic	CAF	Sub-Saharan Africa	Non-official	Angola	Angola (Non-official)	20000	2.22031e+06	0.00900776
Central African Republic	CAF	Sub-Saharan Africa	Official bilateral	Libya	Libya (Official bilateral)	12008	2.22031e+06	0.00540826
Central African Republic	CAF	Sub-Saharan Africa	Official bilateral	France	France (Official bilateral)	5688	2.22031e+06	0.00256181
Central African Republic	CAF	Sub-Saharan Africa	Official multilateral	African Dev. Bank	African Dev. Bank (Official multilateral)	5115	2.22031e+06	0.00230374
Central African Republic	CAF	Sub-Saharan Africa	Non-official	Switzerland	Switzerland (Non-official)	1935	2.22031e+06	0.000871501
Central African Republic	CAF	Sub-Saharan Africa	Non-official	France	France (Non-official)	374	2.22031e+06	0.000168445
Chad	TCD	Sub-Saharan Africa	Non-official	United Kingdom	United Kingdom (Non-official)	1535617	1.1315e+07	0.135716
Chad	TCD	Sub-Saharan Africa	Official multilateral	International Monetary Fund	International Monetary Fund (Official multilateral)	469812	1.1315e+07	0.0415213
Chad	TCD	Sub-Saharan Africa	Official bilateral	Libya	Libya (Official bilateral)	245780	1.1315e+07	0.0217217
Chad	TCD	Sub-Saharan Africa	Official bilateral	China	China (Official bilateral)	235247	1.1315e+07	0.0207908
Chad	TCD	Sub-Saharan Africa	Official multilateral	World Bank-IDA	World Bank-IDA (Official multilateral)	176194	1.1315e+07	0.0155718
Chad	TCD	Sub-Saharan Africa	Official multilateral	African Dev. Bank	African Dev. Bank (Official multilateral)	127801	1.1315e+07	0.0112949
Chad	TCD	Sub-Saharan Africa	Official bilateral	France	France (Official bilateral)	89894	1.1315e+07	0.00794471
Chad	TCD	Sub-Saharan Africa	Official bilateral	India	India (Official bilateral)	47793	1.1315e+07	0.00422388
Chad	TCD	Sub-Saharan Africa	Official bilateral	Kuwait	Kuwait (Official bilateral)	5455	1.1315e+07	0.000482105
Chad	TCD	Sub-Saharan Africa	Non-official	Saudi Arabia	Saudi Arabia (Non-official)	3000	1.1315e+07	0.000265136
Chad	TCD	Sub-Saharan Africa	Official bilateral	Saudi Arabia	Saudi Arabia (Official bilateral)	2720	1.1315e+07	0.00024039
Comoros	COM	Sub-Saharan Africa	Official bilateral	China	China (Official bilateral)	77727	1.16584e+06	0.0666704
Comoros	COM	Sub-Saharan Africa	Official bilateral	India	India (Official bilateral)	36984	1.16584e+06	0.0317231
Comoros	COM	Sub-Saharan Africa	Official multilateral	International Monetary Fund	International Monetary Fund (Official multilateral)	30742	1.16584e+06	0.026369
Comoros	COM	Sub-Saharan Africa	Official bilateral	Kuwait	Kuwait (Official bilateral)	25016	1.16584e+06	0.0214575
Comoros	COM	Sub-Saharan Africa	Official multilateral	World Bank-IDA	World Bank-IDA (Official multilateral)	12320	1.16584e+06	0.0105675
Comoros	COM	Sub-Saharan Africa	Official bilateral	France	France (Official bilateral)	7512	1.16584e+06	0.00644342
Comoros	COM	Sub-Saharan Africa	Official multilateral	African Dev. Bank	African Dev. Bank (Official multilateral)	1521	1.16584e+06	0.00130464
Congo, Dem. Rep.	COD	Sub-Saharan Africa	Official multilateral	World Bank-IDA	World Bank-IDA (Official multilateral)	1287657	5.04007e+07	0.0255484
Congo, Dem. Rep.	COD	Sub-Saharan Africa	Official multilateral	International Monetary Fund	International Monetary Fund (Official multilateral)	1129701	5.04007e+07	0.0224144
Congo, Dem. Rep.	COD	Sub-Saharan Africa	Official bilateral	Multiple Lenders	Multiple Lenders (Official bilateral)	1109244	5.04007e+07	0.0220085
Congo, Dem. Rep.	COD	Sub-Saharan Africa	Official bilateral	China	China (Official bilateral)	456443	5.04007e+07	0.00905627
Congo, Dem. Rep.	COD	Sub-Saharan Africa	Official multilateral	African Dev. Bank	African Dev. Bank (Official multilateral)	408570	5.04007e+07	0.00810643
Congo, Dem. Rep.	COD	Sub-Saharan Africa	Official bilateral	India	India (Official bilateral)	184396	5.04007e+07	0.0036586
Congo, Dem. Rep.	COD	Sub-Saharan Africa	Official bilateral	France	France (Official bilateral)	73374	5.04007e+07	0.00145581
Congo, Dem. Rep.	COD	Sub-Saharan Africa	Non-official	Belgium	Belgium (Non-official)	55549	5.04007e+07	0.00110215
Congo, Dem. Rep.	COD	Sub-Saharan Africa	Non-official	Cote D`Ivoire, Republic Of	Cote D`Ivoire, Republic Of (Non-official)	22441	5.04007e+07	0.000445251
Congo, Dem. Rep.	COD	Sub-Saharan Africa	Official bilateral	Saudi Arabia	Saudi Arabia (Official bilateral)	14941	5.04007e+07	0.000296444
Congo, Dem. Rep.	COD	Sub-Saharan Africa	Non-official	United Kingdom	United Kingdom (Non-official)	10834	5.04007e+07	0.000214957
Congo, Dem. Rep.	COD	Sub-Saharan Africa	Official bilateral	Kuwait	Kuwait (Official bilateral)	9230	5.04007e+07	0.000183132
Congo, Dem. Rep.	COD	Sub-Saharan Africa	Non-official	United States	United States (Non-official)	7666	5.04007e+07	0.000152101
Congo, Dem. Rep.	COD	Sub-Saharan Africa	Non-official	Greece	Greece (Non-official)	3798	5.04007e+07	7.5356e-05
Congo, Dem. Rep.	COD	Sub-Saharan Africa	Non-official	Portugal	Portugal (Non-official)	1379	5.04007e+07	2.73607e-05
Congo, Dem. Rep.	COD	Sub-Saharan Africa	Non-official	Brazil	Brazil (Non-official)	529	5.04007e+07	1.04959e-05
Congo, Rep.	COG	Sub-Saharan Africa	Official bilateral	China	China (Official bilateral)	3751870	1.22674e+07	0.305841
Congo, Rep.	COG	Sub-Saharan Africa	Official multilateral	African Dev. Bank	African Dev. Bank (Official multilateral)	358220	1.22674e+07	0.029201
Congo, Rep.	COG	Sub-Saharan Africa	Bondholders	Bond market	Bond market (Bondholders)	295035	1.22674e+07	0.0240503
Congo, Rep.	COG	Sub-Saharan Africa	Official bilateral	Multiple lenders	Multiple lenders (Official bilateral)	224779	1.22674e+07	0.0183233
Congo, Rep.	COG	Sub-Saharan Africa	Official multilateral	World Bank-IDA	World Bank-IDA (Official multilateral)	196725	1.22674e+07	0.0160364
Congo, Rep.	COG	Sub-Saharan Africa	Official bilateral	France	France (Official bilateral)	165241	1.22674e+07	0.0134699
Congo, Rep.	COG	Sub-Saharan Africa	Official multilateral	International Monetary Fund	International Monetary Fund (Official multilateral)	157172	1.22674e+07	0.0128122
Congo, Rep.	COG	Sub-Saharan Africa	Official bilateral	India	India (Official bilateral)	95841	1.22674e+07	0.00781266
Congo, Rep.	COG	Sub-Saharan Africa	Official bilateral	Saudi Arabia	Saudi Arabia (Official bilateral)	78652	1.22674e+07	0.00641147
Congo, Rep.	COG	Sub-Saharan Africa	Official bilateral	Turkey	Turkey (Official bilateral)	74930	1.22674e+07	0.00610806
Congo, Rep.	COG	Sub-Saharan Africa	Non-official	Multiple lenders	Multiple lenders (Non-official)	70046	1.22674e+07	0.00570993
Congo, Rep.	COG	Sub-Saharan Africa	Official bilateral	Kuwait	Kuwait (Official bilateral)	54697	1.22674e+07	0.00445873
Congo, Rep.	COG	Sub-Saharan Africa	Official bilateral	Brazil	Brazil (Official bilateral)	50017	1.22674e+07	0.00407723
Congo, Rep.	COG	Sub-Saharan Africa	Official multilateral	World Bank-IBRD	World Bank-IBRD (Official multilateral)	46471	1.22674e+07	0.00378817
Congo, Rep.	COG	Sub-Saharan Africa	Official bilateral	United Arab Emirates	United Arab Emirates (Official bilateral)	9534	1.22674e+07	0.000777182
Congo, Rep.	COG	Sub-Saharan Africa	Non-official	France	France (Non-official)	5336	1.22674e+07	0.000434974
Congo, Rep.	COG	Sub-Saharan Africa	Non-official	Brazil	Brazil (Non-official)	1652	1.22674e+07	0.000134666
Congo, Rep.	COG	Sub-Saharan Africa	Non-official	United Arab Emirates	United Arab Emirates (Non-official)	402	1.22674e+07	3.27698e-05
Congo, Rep.	COG	Sub-Saharan Africa	Non-official	Belgium	Belgium (Non-official)	282	1.22674e+07	2.29878e-05
Congo, Rep.	COG	Sub-Saharan Africa	Non-official	Italy	Italy (Non-official)	95	1.22674e+07	7.74411e-06
Côte d'Ivoire	CIV	Sub-Saharan Africa	Official bilateral	China	China (Official bilateral)	2396523	5.85394e+07	0.0409386
Côte d'Ivoire	CIV	Sub-Saharan Africa	Official multilateral	International Monetary Fund	International Monetary Fund (Official multilateral)	1914818	5.85394e+07	0.0327099
Côte d'Ivoire	CIV	Sub-Saharan Africa	Official multilateral	World Bank-IDA	World Bank-IDA (Official multilateral)	1174245	5.85394e+07	0.020059
Côte d'Ivoire	CIV	Sub-Saharan Africa	Official bilateral	France	France (Official bilateral)	638086	5.85394e+07	0.0109001
Côte d'Ivoire	CIV	Sub-Saharan Africa	Non-official	France	France (Non-official)	571028	5.85394e+07	0.00975459
Côte d'Ivoire	CIV	Sub-Saharan Africa	Official multilateral	African Dev. Bank	African Dev. Bank (Official multilateral)	436463	5.85394e+07	0.00745588
Côte d'Ivoire	CIV	Sub-Saharan Africa	Bondholders	Bond market	Bond market (Bondholders)	396257	5.85394e+07	0.00676906
Côte d'Ivoire	CIV	Sub-Saharan Africa	Non-official	United Kingdom	United Kingdom (Non-official)	258382	5.85394e+07	0.00441381
Côte d'Ivoire	CIV	Sub-Saharan Africa	Official bilateral	India	India (Official bilateral)	229195	5.85394e+07	0.00391522
Côte d'Ivoire	CIV	Sub-Saharan Africa	Non-official	China	China (Non-official)	150061	5.85394e+07	0.00256342
Côte d'Ivoire	CIV	Sub-Saharan Africa	Non-official	Czech Republic	Czech Republic (Non-official)	100623	5.85394e+07	0.00171889
Côte d'Ivoire	CIV	Sub-Saharan Africa	Official bilateral	Kuwait	Kuwait (Official bilateral)	31625	5.85394e+07	0.000540234
Côte d'Ivoire	CIV	Sub-Saharan Africa	Official multilateral	World Bank-IBRD	World Bank-IBRD (Official multilateral)	29900	5.85394e+07	0.000510767
Côte d'Ivoire	CIV	Sub-Saharan Africa	Official bilateral	Spain	Spain (Official bilateral)	25831	5.85394e+07	0.000441258
Côte d'Ivoire	CIV	Sub-Saharan Africa	Official bilateral	Saudi Arabia	Saudi Arabia (Official bilateral)	20765	5.85394e+07	0.000354718
Côte d'Ivoire	CIV	Sub-Saharan Africa	Official bilateral	United States	United States (Official bilateral)	2084	5.85394e+07	3.55999e-05
Côte d'Ivoire	CIV	Sub-Saharan Africa	Official bilateral	Germany	Germany (Official bilateral)	590	5.85394e+07	1.00787e-05
Djibouti	DJI	Middle East & North Africa	Official bilateral	China	China (Official bilateral)	1195470	3.32463e+06	0.359579
Djibouti	DJI	Middle East & North Africa	Official bilateral	Saudi Arabia	Saudi Arabia (Official bilateral)	163927	3.32463e+06	0.0493068
Djibouti	DJI	Middle East & North Africa	Official multilateral	World Bank-IDA	World Bank-IDA (Official multilateral)	161260	3.32463e+06	0.0485046
Djibouti	DJI	Middle East & North Africa	Official multilateral	African Dev. Bank	African Dev. Bank (Official multilateral)	112928	3.32463e+06	0.033967
Djibouti	DJI	Middle East & North Africa	Official bilateral	Kuwait	Kuwait (Official bilateral)	44663	3.32463e+06	0.013434
Djibouti	DJI	Middle East & North Africa	Official bilateral	India	India (Official bilateral)	38527	3.32463e+06	0.0115883
Djibouti	DJI	Middle East & North Africa	Official bilateral	Spain	Spain (Official bilateral)	32220	3.32463e+06	0.00969129
Djibouti	DJI	Middle East & North Africa	Official multilateral	International Monetary Fund	International Monetary Fund (Official multilateral)	31639	3.32463e+06	0.00951654
Djibouti	DJI	Middle East & North Africa	Official bilateral	Italy	Italy (Official bilateral)	9953	3.32463e+06	0.00299371
Djibouti	DJI	Middle East & North Africa	Official bilateral	United Arab Emirates	United Arab Emirates (Official bilateral)	7528	3.32463e+06	0.00226431
Djibouti	DJI	Middle East & North Africa	Non-official	Spain	Spain (Non-official)	3599	3.32463e+06	0.00108253
Djibouti	DJI	Middle East & North Africa	Official bilateral	France	France (Official bilateral)	3135	3.32463e+06	0.000942961
Djibouti	DJI	Middle East & North Africa	Official bilateral	Turkey	Turkey (Official bilateral)	733	3.32463e+06	0.000220475
Djibouti	DJI	Middle East & North Africa	Official bilateral	Belgium	Belgium (Official bilateral)	103	3.32463e+06	3.09809e-05
Dominica	DMA	Latin America & Caribbean	Bondholders	Bond market	Bond market (Bondholders)	44961	582404	0.077199
Dominica	DMA	Latin America & Caribbean	Official multilateral	World Bank-IDA	World Bank-IDA (Official multilateral)	35556	582404	0.0610504
Dominica	DMA	Latin America & Caribbean	Official bilateral	China	China (Official bilateral)	29456	582404	0.0505766
Dominica	DMA	Latin America & Caribbean	Official multilateral	International Monetary Fund	International Monetary Fund (Official multilateral)	20760	582404	0.0356454
Dominica	DMA	Latin America & Caribbean	Official bilateral	France	France (Official bilateral)	18661	582404	0.0320413
Dominica	DMA	Latin America & Caribbean	Non-official	Trinidad and Tobago	Trinidad and Tobago (Non-official)	8294	582404	0.014241
Dominica	DMA	Latin America & Caribbean	Non-official	United Kingdom	United Kingdom (Non-official)	7964	582404	0.0136744
Dominica	DMA	Latin America & Caribbean	Official bilateral	Venezuela, RB	Venezuela, RB (Official bilateral)	4018	582404	0.00689899
Dominica	DMA	Latin America & Caribbean	Non-official	United States	United States (Non-official)	3082	582404	0.00529186
Dominica	DMA	Latin America & Caribbean	Non-official	St. Vincent and The Grenadines	St. Vincent and The Grenadines (Non-official)	1789	582404	0.00307175
Dominica	DMA	Latin America & Caribbean	Official bilateral	Kuwait	Kuwait (Official bilateral)	1383	582404	0.00237464
Dominica	DMA	Latin America & Caribbean	Non-official	Barbados	Barbados (Non-official)	728	582404	0.00124999
Dominica	DMA	Latin America & Caribbean	Non-official	St. Lucia	St. Lucia (Non-official)	574	582404	0.000985571
Dominica	DMA	Latin America & Caribbean	Non-official	Grenada	Grenada (Non-official)	409	582404	0.000702262
Dominica	DMA	Latin America & Caribbean	Non-official	St. Kitts And Nevis	St. Kitts And Nevis (Non-official)	19	582404	3.26234e-05
Ethiopia	ETH	Sub-Saharan Africa	Official multilateral	World Bank-IDA	World Bank-IDA (Official multilateral)	9354350	9.59126e+07	0.0975299
Ethiopia	ETH	Sub-Saharan Africa	Official bilateral	China	China (Official bilateral)	6534877	9.59126e+07	0.0681337
Ethiopia	ETH	Sub-Saharan Africa	Official multilateral	African Dev. Bank	African Dev. Bank (Official multilateral)	2164834	9.59126e+07	0.0225709
Ethiopia	ETH	Sub-Saharan Africa	Non-official	China	China (Non-official)	1816761	9.59126e+07	0.0189418
Ethiopia	ETH	Sub-Saharan Africa	Non-official	United States	United States (Non-official)	1390624	9.59126e+07	0.0144989
Ethiopia	ETH	Sub-Saharan Africa	Bondholders	Bond market	Bond market (Bondholders)	1000000	9.59126e+07	0.0104262
Ethiopia	ETH	Sub-Saharan Africa	Non-official	Switzerland	Switzerland (Non-official)	877271	9.59126e+07	0.00914657
Ethiopia	ETH	Sub-Saharan Africa	Non-official	Italy	Italy (Non-official)	382117	9.59126e+07	0.00398401
Ethiopia	ETH	Sub-Saharan Africa	Official bilateral	India	India (Official bilateral)	376934	9.59126e+07	0.00392997
Ethiopia	ETH	Sub-Saharan Africa	Non-official	United Kingdom	United Kingdom (Non-official)	368040	9.59126e+07	0.00383724
Ethiopia	ETH	Sub-Saharan Africa	Non-official	France	France (Non-official)	326062	9.59126e+07	0.00339957
Ethiopia	ETH	Sub-Saharan Africa	Official multilateral	International Monetary Fund	International Monetary Fund (Official multilateral)	318290	9.59126e+07	0.00331854
Ethiopia	ETH	Sub-Saharan Africa	Official bilateral	Turkey	Turkey (Official bilateral)	240000	9.59126e+07	0.00250228
Ethiopia	ETH	Sub-Saharan Africa	Official bilateral	Libya	Libya (Official bilateral)	237287	9.59126e+07	0.00247399
Ethiopia	ETH	Sub-Saharan Africa	Official bilateral	France	France (Official bilateral)	232485	9.59126e+07	0.00242393
Ethiopia	ETH	Sub-Saharan Africa	Non-official	Japan	Japan (Non-official)	231783	9.59126e+07	0.00241661
Ethiopia	ETH	Sub-Saharan Africa	Non-official	Israel	Israel (Non-official)	148386	9.59126e+07	0.0015471
Ethiopia	ETH	Sub-Saharan Africa	Official bilateral	Italy	Italy (Official bilateral)	137090	9.59126e+07	0.00142932
Ethiopia	ETH	Sub-Saharan Africa	Non-official	South Africa	South Africa (Non-official)	133651	9.59126e+07	0.00139347
Ethiopia	ETH	Sub-Saharan Africa	Non-official	Sweden	Sweden (Non-official)	119092	9.59126e+07	0.00124167
Ethiopia	ETH	Sub-Saharan Africa	Official bilateral	Canada	Canada (Official bilateral)	72224	9.59126e+07	0.000753019
Ethiopia	ETH	Sub-Saharan Africa	Official bilateral	Kuwait	Kuwait (Official bilateral)	64719	9.59126e+07	0.000674771
Ethiopia	ETH	Sub-Saharan Africa	Official bilateral	Japan	Japan (Official bilateral)	50403	9.59126e+07	0.00052551
Ethiopia	ETH	Sub-Saharan Africa	Official bilateral	Saudi Arabia	Saudi Arabia (Official bilateral)	36401	9.59126e+07	0.000379523
Ethiopia	ETH	Sub-Saharan Africa	Official bilateral	Germany	Germany (Official bilateral)	27569	9.59126e+07	0.000287439
Ethiopia	ETH	Sub-Saharan Africa	Non-official	United Arab Emirates	United Arab Emirates (Non-official)	11818	9.59126e+07	0.000123216
Ethiopia	ETH	Sub-Saharan Africa	Non-official	India	India (Non-official)	11510	9.59126e+07	0.000120005
Ethiopia	ETH	Sub-Saharan Africa	Non-official	Serbia	Serbia (Non-official)	4203	9.59126e+07	4.38211e-05
Ethiopia	ETH	Sub-Saharan Africa	Non-official	Egypt	Egypt (Non-official)	82	9.59126e+07	8.54945e-07
Ethiopia	ETH	Sub-Saharan Africa	Official bilateral	United Arab Emirates	United Arab Emirates (Official bilateral)	77	9.59126e+07	8.02814e-07
Fiji	FJI	East Asia & Pacific	Official bilateral	China	China (Official bilateral)	201826	5.49625e+06	0.0367207
Fiji	FJI	East Asia & Pacific	Bondholders	Bond market	Bond market (Bondholders)	200000	5.49625e+06	0.0363884
Fiji	FJI	East Asia & Pacific	Official multilateral	Asian Dev. Bank	Asian Dev. Bank (Official multilateral)	185580	5.49625e+06	0.0337648
Fiji	FJI	East Asia & Pacific	Official multilateral	International Monetary Fund	International Monetary Fund (Official multilateral)	92779	5.49625e+06	0.0168804
Fiji	FJI	East Asia & Pacific	Official multilateral	World Bank-IBRD	World Bank-IBRD (Official multilateral)	76205	5.49625e+06	0.0138649
Fiji	FJI	East Asia & Pacific	Official bilateral	India	India (Official bilateral)	32253	5.49625e+06	0.00586818
Fiji	FJI	East Asia & Pacific	Official bilateral	Japan	Japan (Official bilateral)	3895	5.49625e+06	0.000708665
Gambia, The	GMB	Sub-Saharan Africa	Official multilateral	World Bank-IDA	World Bank-IDA (Official multilateral)	117666	1.82607e+06	0.0644366
Gambia, The	GMB	Sub-Saharan Africa	Official multilateral	International Monetary Fund	International Monetary Fund (Official multilateral)	77242	1.82607e+06	0.0422995
Gambia, The	GMB	Sub-Saharan Africa	Official multilateral	African Dev. Bank	African Dev. Bank (Official multilateral)	57091	1.82607e+06	0.0312643
Gambia, The	GMB	Sub-Saharan Africa	Official bilateral	Saudi Arabia	Saudi Arabia (Official bilateral)	55603	1.82607e+06	0.0304495
Gambia, The	GMB	Sub-Saharan Africa	Official bilateral	Kuwait	Kuwait (Official bilateral)	51302	1.82607e+06	0.0280942
Gambia, The	GMB	Sub-Saharan Africa	Official bilateral	India	India (Official bilateral)	23407	1.82607e+06	0.0128182
Gambia, The	GMB	Sub-Saharan Africa	Official bilateral	United Arab Emirates	United Arab Emirates (Official bilateral)	17000	1.82607e+06	0.00930959
Gambia, The	GMB	Sub-Saharan Africa	Official bilateral	Libya	Libya (Official bilateral)	3950	1.82607e+06	0.00216311
Gambia, The	GMB	Sub-Saharan Africa	Official bilateral	Austria	Austria (Official bilateral)	662	1.82607e+06	0.000362526
Gambia, The	GMB	Sub-Saharan Africa	Official bilateral	Belgium	Belgium (Official bilateral)	504	1.82607e+06	0.000276002
Ghana	GHA	Sub-Saharan Africa	Bondholders	Bond market	Bond market (Bondholders)	8047979	6.69836e+07	0.120148
Ghana	GHA	Sub-Saharan Africa	Official multilateral	World Bank-IDA	World Bank-IDA (Official multilateral)	3989482	6.69836e+07	0.0595591
Ghana	GHA	Sub-Saharan Africa	Official bilateral	China	China (Official bilateral)	1589491	6.69836e+07	0.0237295
Ghana	GHA	Sub-Saharan Africa	Official multilateral	International Monetary Fund	International Monetary Fund (Official multilateral)	1575604	6.69836e+07	0.0235222
Ghana	GHA	Sub-Saharan Africa	Official multilateral	African Dev. Bank	African Dev. Bank (Official multilateral)	1159104	6.69836e+07	0.0173043
Ghana	GHA	Sub-Saharan Africa	Non-official	Korea, Republic Of	Korea, Republic Of (Non-official)	1154431	6.69836e+07	0.0172345
Ghana	GHA	Sub-Saharan Africa	Non-official	United Kingdom	United Kingdom (Non-official)	471544	6.69836e+07	0.00703969
Ghana	GHA	Sub-Saharan Africa	Non-official	United States	United States (Non-official)	414988	6.69836e+07	0.00619536
Ghana	GHA	Sub-Saharan Africa	Non-official	France	France (Non-official)	386099	6.69836e+07	0.00576408
Ghana	GHA	Sub-Saharan Africa	Official bilateral	Egypt	Egypt (Official bilateral)	291891	6.69836e+07	0.00435765
Ghana	GHA	Sub-Saharan Africa	Official bilateral	France	France (Official bilateral)	279591	6.69836e+07	0.00417402
Ghana	GHA	Sub-Saharan Africa	Non-official	Netherlands	Netherlands (Non-official)	255404	6.69836e+07	0.00381293
Ghana	GHA	Sub-Saharan Africa	Official bilateral	India	India (Official bilateral)	244558	6.69836e+07	0.00365101
Ghana	GHA	Sub-Saharan Africa	Official bilateral	United States	United States (Official bilateral)	243978	6.69836e+07	0.00364235
Ghana	GHA	Sub-Saharan Africa	Non-official	China	China (Non-official)	234522	6.69836e+07	0.00350118
Ghana	GHA	Sub-Saharan Africa	Official bilateral	Germany	Germany (Official bilateral)	231092	6.69836e+07	0.00344998
Ghana	GHA	Sub-Saharan Africa	Non-official	Israel	Israel (Non-official)	183771	6.69836e+07	0.00274352
Ghana	GHA	Sub-Saharan Africa	Non-official	Austria	Austria (Non-official)	176611	6.69836e+07	0.00263663
Ghana	GHA	Sub-Saharan Africa	Non-official	Brazil	Brazil (Non-official)	163983	6.69836e+07	0.00244811
Ghana	GHA	Sub-Saharan Africa	Official bilateral	Turkey	Turkey (Official bilateral)	93766	6.69836e+07	0.00139983
Ghana	GHA	Sub-Saharan Africa	Non-official	Multiple lenders	Multiple lenders (Non-official)	59638	6.69836e+07	0.000890337
Ghana	GHA	Sub-Saharan Africa	Non-official	Belgium	Belgium (Non-official)	54593	6.69836e+07	0.00081502
Ghana	GHA	Sub-Saharan Africa	Official bilateral	Kuwait	Kuwait (Official bilateral)	49026	6.69836e+07	0.00073191
Ghana	GHA	Sub-Saharan Africa	Non-official	Mauritius	Mauritius (Non-official)	47317	6.69836e+07	0.000706396
Ghana	GHA	Sub-Saharan Africa	Non-official	Spain	Spain (Non-official)	41617	6.69836e+07	0.000621301
Ghana	GHA	Sub-Saharan Africa	Non-official	Italy	Italy (Non-official)	39938	6.69836e+07	0.000596235
Ghana	GHA	Sub-Saharan Africa	Non-official	Switzerland	Switzerland (Non-official)	27280	6.69836e+07	0.000407264
Ghana	GHA	Sub-Saharan Africa	Official bilateral	Spain	Spain (Official bilateral)	25920	6.69836e+07	0.00038696
Ghana	GHA	Sub-Saharan Africa	Official bilateral	Belgium	Belgium (Official bilateral)	23198	6.69836e+07	0.000346323
Ghana	GHA	Sub-Saharan Africa	Official bilateral	Italy	Italy (Official bilateral)	22421	6.69836e+07	0.000334724
Ghana	GHA	Sub-Saharan Africa	Non-official	Sweden	Sweden (Non-official)	19456	6.69836e+07	0.000290459
Ghana	GHA	Sub-Saharan Africa	Official bilateral	Saudi Arabia	Saudi Arabia (Official bilateral)	18337	6.69836e+07	0.000273753
Ghana	GHA	Sub-Saharan Africa	Official bilateral	Brazil	Brazil (Official bilateral)	6115	6.69836e+07	9.1291e-05
Ghana	GHA	Sub-Saharan Africa	Non-official	Germany	Germany (Non-official)	6063	6.69836e+07	9.05146e-05
Ghana	GHA	Sub-Saharan Africa	Official bilateral	Austria	Austria (Official bilateral)	3064	6.69836e+07	4.57425e-05
Ghana	GHA	Sub-Saharan Africa	Official bilateral	Nigeria	Nigeria (Official bilateral)	1060	6.69836e+07	1.58248e-05
Ghana	GHA	Sub-Saharan Africa	Official bilateral	Sweden	Sweden (Official bilateral)	95	6.69836e+07	1.41826e-06
Grenada	GRD	Latin America & Caribbean	Official multilateral	World Bank-IDA	World Bank-IDA (Official multilateral)	122773	1.2106e+06	0.101415
Grenada	GRD	Latin America & Caribbean	Bondholders	Bond market	Bond market (Bondholders)	99355	1.2106e+06	0.0820706
Grenada	GRD	Latin America & Caribbean	Official bilateral	China	China (Official bilateral)	41321	1.2106e+06	0.0341326
Grenada	GRD	Latin America & Caribbean	Official multilateral	International Monetary Fund	International Monetary Fund (Official multilateral)	35609	1.2106e+06	0.0294143
Grenada	GRD	Latin America & Caribbean	Official bilateral	Kuwait	Kuwait (Official bilateral)	12404	1.2106e+06	0.0102461
Grenada	GRD	Latin America & Caribbean	Official multilateral	World Bank-IBRD	World Bank-IBRD (Official multilateral)	8618	1.2106e+06	0.00711876
Grenada	GRD	Latin America & Caribbean	Official bilateral	Venezuela, RB	Venezuela, RB (Official bilateral)	5297	1.2106e+06	0.0043755
Grenada	GRD	Latin America & Caribbean	Official bilateral	Libya	Libya (Official bilateral)	5000	1.2106e+06	0.00413017
Grenada	GRD	Latin America & Caribbean	Official bilateral	Germany	Germany (Official bilateral)	3395	1.2106e+06	0.00280439
Grenada	GRD	Latin America & Caribbean	Official bilateral	France	France (Official bilateral)	3071	1.2106e+06	0.00253675
Grenada	GRD	Latin America & Caribbean	Official bilateral	Austria	Austria (Official bilateral)	2705	1.2106e+06	0.00223442
Grenada	GRD	Latin America & Caribbean	Official bilateral	United States	United States (Official bilateral)	1526	1.2106e+06	0.00126053
Grenada	GRD	Latin America & Caribbean	Non-official	Italy	Italy (Non-official)	1387	1.2106e+06	0.00114571
Grenada	GRD	Latin America & Caribbean	Official bilateral	United Kingdom	United Kingdom (Official bilateral)	1334	1.2106e+06	0.00110193
Grenada	GRD	Latin America & Caribbean	Non-official	United States	United States (Non-official)	337	1.2106e+06	0.000278374
Guinea	GIN	Sub-Saharan Africa	Official bilateral	China	China (Official bilateral)	637088	1.22967e+07	0.0518098
Guinea	GIN	Sub-Saharan Africa	Official multilateral	International Monetary Fund	International Monetary Fund (Official multilateral)	481053	1.22967e+07	0.0391206
Guinea	GIN	Sub-Saharan Africa	Official multilateral	World Bank-IDA	World Bank-IDA (Official multilateral)	471165	1.22967e+07	0.0383165
Guinea	GIN	Sub-Saharan Africa	Official multilateral	African Dev. Bank	African Dev. Bank (Official multilateral)	152806	1.22967e+07	0.0124266
Guinea	GIN	Sub-Saharan Africa	Official bilateral	Switzerland	Switzerland (Official bilateral)	105728	1.22967e+07	0.0085981
Guinea	GIN	Sub-Saharan Africa	Official bilateral	France	France (Official bilateral)	84183	1.22967e+07	0.006846
Guinea	GIN	Sub-Saharan Africa	Official bilateral	Kuwait	Kuwait (Official bilateral)	46567	1.22967e+07	0.00378696
Guinea	GIN	Sub-Saharan Africa	Non-official	China	China (Non-official)	44369	1.22967e+07	0.00360821
Guinea	GIN	Sub-Saharan Africa	Official bilateral	Saudi Arabia	Saudi Arabia (Official bilateral)	40710	1.22967e+07	0.00331065
Guinea	GIN	Sub-Saharan Africa	Official bilateral	Libya	Libya (Official bilateral)	20000	1.22967e+07	0.00162646
Guinea	GIN	Sub-Saharan Africa	Non-official	Serbia	Serbia (Non-official)	16165	1.22967e+07	0.00131458
Guinea	GIN	Sub-Saharan Africa	Official bilateral	Thailand	Thailand (Official bilateral)	6918	1.22967e+07	0.000562592
Guinea	GIN	Sub-Saharan Africa	Official bilateral	Egypt	Egypt (Official bilateral)	4766	1.22967e+07	0.000387585
Guinea	GIN	Sub-Saharan Africa	Non-official	United Kingdom	United Kingdom (Non-official)	2809	1.22967e+07	0.000228436
Guinea	GIN	Sub-Saharan Africa	Official bilateral	Multiple lenders	Multiple lenders (Official bilateral)	1290	1.22967e+07	0.000104906
Guinea-Bissau	GNB	Sub-Saharan Africa	Bondholders	Bond market	Bond market (Bondholders)	126217	1.33945e+06	0.0942305
Guinea-Bissau	GNB	Sub-Saharan Africa	Official multilateral	World Bank-IDA	World Bank-IDA (Official multilateral)	126124	1.33945e+06	0.0941611
Guinea-Bissau	GNB	Sub-Saharan Africa	Official multilateral	International Monetary Fund	International Monetary Fund (Official multilateral)	50291	1.33945e+06	0.037546
Guinea-Bissau	GNB	Sub-Saharan Africa	Official multilateral	African Dev. Bank	African Dev. Bank (Official multilateral)	29389	1.33945e+06	0.0219411
Guinea-Bissau	GNB	Sub-Saharan Africa	Official bilateral	Kuwait	Kuwait (Official bilateral)	24639	1.33945e+06	0.0183949
Guinea-Bissau	GNB	Sub-Saharan Africa	Official bilateral	Saudi Arabia	Saudi Arabia (Official bilateral)	17229	1.33945e+06	0.0128628
Guinea-Bissau	GNB	Sub-Saharan Africa	Official bilateral	India	India (Official bilateral)	13889	1.33945e+06	0.0103692
Guinea-Bissau	GNB	Sub-Saharan Africa	Official bilateral	Libya	Libya (Official bilateral)	9514	1.33945e+06	0.00710292
Guinea-Bissau	GNB	Sub-Saharan Africa	Official bilateral	United Arab Emirates	United Arab Emirates (Official bilateral)	1892	1.33945e+06	0.00141252
Guyana	GUY	Latin America & Caribbean	Official multilateral	Inter-American Dev. Bank	Inter-American Dev. Bank (Official multilateral)	546180	5.17376e+06	0.105567
Guyana	GUY	Latin America & Caribbean	Official bilateral	China	China (Official bilateral)	232339	5.17376e+06	0.0449072
Guyana	GUY	Latin America & Caribbean	Official multilateral	International Monetary Fund	International Monetary Fund (Official multilateral)	120423	5.17376e+06	0.0232757
Guyana	GUY	Latin America & Caribbean	Official bilateral	Venezuela, RB	Venezuela, RB (Official bilateral)	109744	5.17376e+06	0.0212117
Guyana	GUY	Latin America & Caribbean	Official multilateral	World Bank-IDA	World Bank-IDA (Official multilateral)	82971	5.17376e+06	0.0160369
Guyana	GUY	Latin America & Caribbean	Official bilateral	Kuwait	Kuwait (Official bilateral)	20631	5.17376e+06	0.00398762
Guyana	GUY	Latin America & Caribbean	Non-official	United Kingdom	United Kingdom (Non-official)	15816	5.17376e+06	0.00305696
Guyana	GUY	Latin America & Caribbean	Official bilateral	Libya	Libya (Official bilateral)	15000	5.17376e+06	0.00289925
Guyana	GUY	Latin America & Caribbean	Official bilateral	India	India (Official bilateral)	14470	5.17376e+06	0.00279681
Guyana	GUY	Latin America & Caribbean	Non-official	Trinidad and Tobago	Trinidad and Tobago (Non-official)	12539	5.17376e+06	0.00242358
Guyana	GUY	Latin America & Caribbean	Official bilateral	Argentina	Argentina (Official bilateral)	4515	5.17376e+06	0.000872673
Guyana	GUY	Latin America & Caribbean	Non-official	United States	United States (Non-official)	3450	5.17376e+06	0.000666827
Guyana	GUY	Latin America & Caribbean	Official bilateral	United Arab Emirates	United Arab Emirates (Official bilateral)	3241	5.17376e+06	0.00062643
Guyana	GUY	Latin America & Caribbean	Official bilateral	Italy	Italy (Official bilateral)	2551	5.17376e+06	0.000493065
Guyana	GUY	Latin America & Caribbean	Official bilateral	United States	United States (Official bilateral)	481	5.17376e+06	9.29691e-05
Guyana	GUY	Latin America & Caribbean	Non-official	Multiple lenders	Multiple lenders (Non-official)	191	5.17376e+06	3.69171e-05
Guyana	GUY	Latin America & Caribbean	Official bilateral	United Kingdom	United Kingdom (Official bilateral)	92	5.17376e+06	1.7782e-05
Guyana	GUY	Latin America & Caribbean	Non-official	India	India (Non-official)	43	5.17376e+06	8.31117e-06
Guyana	GUY	Latin America & Caribbean	Bondholders	Bond market	Bond market (Bondholders)	28	5.17376e+06	5.41193e-06
Haiti	HTI	Latin America & Caribbean	Official bilateral	Venezuela, Republic Bolivarian	Venezuela, Republic Bolivarian (Official bilateral)	1839357	1.43322e+07	0.128338
Haiti	HTI	Latin America & Caribbean	Official multilateral	International Monetary Fund	International Monetary Fund (Official multilateral)	185491	1.43322e+07	0.0129423
Haiti	HTI	Latin America & Caribbean	Official bilateral	Multiple Lenders	Multiple Lenders (Official bilateral)	4915	1.43322e+07	0.000342935
Haiti	HTI	Latin America & Caribbean	Official multilateral	Inter-American Dev. Bank	Inter-American Dev. Bank (Official multilateral)	500	1.43322e+07	3.48866e-05
Honduras	HND	Latin America & Caribbean	Official multilateral	Inter-American Dev. Bank	Inter-American Dev. Bank (Official multilateral)	2325970	2.50954e+07	0.0926851
Honduras	HND	Latin America & Caribbean	Bondholders	Bond market	Bond market (Bondholders)	1700000	2.50954e+07	0.0677415
Honduras	HND	Latin America & Caribbean	Official multilateral	World Bank-IDA	World Bank-IDA (Official multilateral)	908491	2.50954e+07	0.0362015
Honduras	HND	Latin America & Caribbean	Non-official	China	China (Non-official)	296770	2.50954e+07	0.0118257
Honduras	HND	Latin America & Caribbean	Official multilateral	International Monetary Fund	International Monetary Fund (Official multilateral)	171263	2.50954e+07	0.00682448
Honduras	HND	Latin America & Caribbean	Official bilateral	China	China (Official bilateral)	170004	2.50954e+07	0.00677431
Honduras	HND	Latin America & Caribbean	Official bilateral	Venezuela, Republic Bolivarian	Venezuela, Republic Bolivarian (Official bilateral)	144254	2.50954e+07	0.00574823
Honduras	HND	Latin America & Caribbean	Official bilateral	Spain	Spain (Official bilateral)	85340	2.50954e+07	0.00340062
Honduras	HND	Latin America & Caribbean	Official bilateral	Italy	Italy (Official bilateral)	70096	2.50954e+07	0.00279318
Honduras	HND	Latin America & Caribbean	Non-official	Austria	Austria (Non-official)	70095	2.50954e+07	0.00279314
Honduras	HND	Latin America & Caribbean	Official bilateral	Germany, Fed.Rep. Of	Germany, Fed.Rep. Of (Official bilateral)	54434	2.50954e+07	0.00216908
Honduras	HND	Latin America & Caribbean	Official bilateral	Brazil	Brazil (Official bilateral)	47010	2.50954e+07	0.00187325
Honduras	HND	Latin America & Caribbean	Official bilateral	Kuwait	Kuwait (Official bilateral)	42052	2.50954e+07	0.00167569
Honduras	HND	Latin America & Caribbean	Non-official	United States	United States (Non-official)	29735	2.50954e+07	0.00118488
Honduras	HND	Latin America & Caribbean	Non-official	Netherlands	Netherlands (Non-official)	26836	2.50954e+07	0.00106936
Honduras	HND	Latin America & Caribbean	Official bilateral	India	India (Official bilateral)	21939	2.50954e+07	0.000874224
Honduras	HND	Latin America & Caribbean	Non-official	Italy	Italy (Non-official)	17257	2.50954e+07	0.000687656
Honduras	HND	Latin America & Caribbean	Official bilateral	France	France (Official bilateral)	7285	2.50954e+07	0.000290292
Honduras	HND	Latin America & Caribbean	Non-official	Belgium	Belgium (Non-official)	4005	2.50954e+07	0.000159591
Honduras	HND	Latin America & Caribbean	Official bilateral	Japan	Japan (Official bilateral)	2053	2.50954e+07	8.18078e-05
Honduras	HND	Latin America & Caribbean	Official bilateral	Switzerland	Switzerland (Official bilateral)	1938	2.50954e+07	7.72253e-05
Honduras	HND	Latin America & Caribbean	Official bilateral	United States	United States (Official bilateral)	1656	2.50954e+07	6.59882e-05
Honduras	HND	Latin America & Caribbean	Non-official	France	France (Non-official)	233	2.50954e+07	9.28457e-06
Kenya	KEN	Sub-Saharan Africa	Official bilateral	China	China (Official bilateral)	7493449	9.55031e+07	0.0784629
Kenya	KEN	Sub-Saharan Africa	Official multilateral	World Bank-IDA	World Bank-IDA (Official multilateral)	7124964	9.55031e+07	0.0746045
Kenya	KEN	Sub-Saharan Africa	Bondholders	Bond market	Bond market (Bondholders)	6100000	9.55031e+07	0.0638723
Kenya	KEN	Sub-Saharan Africa	Official multilateral	African Dev. Bank	African Dev. Bank (Official multilateral)	2422994	9.55031e+07	0.0253708
Kenya	KEN	Sub-Saharan Africa	Official bilateral	Japan	Japan (Official bilateral)	1371133	9.55031e+07	0.0143569
Kenya	KEN	Sub-Saharan Africa	Official bilateral	France	France (Official bilateral)	752566	9.55031e+07	0.00788002
Kenya	KEN	Sub-Saharan Africa	Official multilateral	International Monetary Fund	International Monetary Fund (Official multilateral)	719708	9.55031e+07	0.00753597
Kenya	KEN	Sub-Saharan Africa	Non-official	Italy	Italy (Non-official)	626416	9.55031e+07	0.00655912
Kenya	KEN	Sub-Saharan Africa	Official bilateral	Germany	Germany (Official bilateral)	321520	9.55031e+07	0.00336659
Kenya	KEN	Sub-Saharan Africa	Official bilateral	Spain	Spain (Official bilateral)	109691	9.55031e+07	0.00114856
Kenya	KEN	Sub-Saharan Africa	Non-official	Belgium	Belgium (Non-official)	82608	9.55031e+07	0.000864977
Kenya	KEN	Sub-Saharan Africa	Non-official	United Kingdom	United Kingdom (Non-official)	78074	9.55031e+07	0.000817502
Kenya	KEN	Sub-Saharan Africa	Official bilateral	India	India (Official bilateral)	74488	9.55031e+07	0.000779954
Kenya	KEN	Sub-Saharan Africa	Non-official	Switzerland	Switzerland (Non-official)	72637	9.55031e+07	0.000760572
Kenya	KEN	Sub-Saharan Africa	Non-official	Germany	Germany (Non-official)	55477	9.55031e+07	0.000580892
Kenya	KEN	Sub-Saharan Africa	Non-official	Israel	Israel (Non-official)	38011	9.55031e+07	0.000398008
Kenya	KEN	Sub-Saharan Africa	Official bilateral	Belgium	Belgium (Official bilateral)	29694	9.55031e+07	0.000310922
Kenya	KEN	Sub-Saharan Africa	Official bilateral	Saudi Arabia	Saudi Arabia (Official bilateral)	22690	9.55031e+07	0.000237584
Kenya	KEN	Sub-Saharan Africa	Non-official	Spain	Spain (Non-official)	20548	9.55031e+07	0.000215155
Kenya	KEN	Sub-Saharan Africa	Official bilateral	United States	United States (Official bilateral)	17448	9.55031e+07	0.000182696
Kenya	KEN	Sub-Saharan Africa	Non-official	Austria	Austria (Non-official)	15331	9.55031e+07	0.000160529
Kenya	KEN	Sub-Saharan Africa	Official bilateral	Kuwait	Kuwait (Official bilateral)	14156	9.55031e+07	0.000148226
Kenya	KEN	Sub-Saharan Africa	Non-official	France	France (Non-official)	12181	9.55031e+07	0.000127546
Kenya	KEN	Sub-Saharan Africa	Official bilateral	Italy	Italy (Official bilateral)	4332	9.55031e+07	4.53598e-05
Kenya	KEN	Sub-Saharan Africa	Official bilateral	Austria	Austria (Official bilateral)	3370	9.55031e+07	3.52868e-05
Kenya	KEN	Sub-Saharan Africa	Official bilateral	United Arab Emirates	United Arab Emirates (Official bilateral)	3092	9.55031e+07	3.23759e-05
Kenya	KEN	Sub-Saharan Africa	Official bilateral	Netherlands	Netherlands (Official bilateral)	1738	9.55031e+07	1.81984e-05
Kenya	KEN	Sub-Saharan Africa	Official bilateral	Canada	Canada (Official bilateral)	576	9.55031e+07	6.03122e-06
Kenya	KEN	Sub-Saharan Africa	Official bilateral	United Kingdom	United Kingdom (Official bilateral)	321	9.55031e+07	3.36115e-06
Kosovo	XKX	Europe & Central Asia	Official multilateral	International Monetary Fund	International Monetary Fund (Official multilateral)	224941	7.92613e+06	0.0283797
Kosovo	XKX	Europe & Central Asia	Official multilateral	World Bank-IBRD	World Bank-IBRD (Official multilateral)	152299	7.92613e+06	0.0192148
Kosovo	XKX	Europe & Central Asia	Official multilateral	World Bank-IDA	World Bank-IDA (Official multilateral)	67757	7.92613e+06	0.00854856
Kosovo	XKX	Europe & Central Asia	Official bilateral	Germany, Fed.Rep. Of	Germany, Fed.Rep. Of (Official bilateral)	48070	7.92613e+06	0.00606475
Kosovo	XKX	Europe & Central Asia	Non-official	Austria	Austria (Non-official)	16042	7.92613e+06	0.00202394
Kosovo	XKX	Europe & Central Asia	Official bilateral	Saudi Arabia	Saudi Arabia (Official bilateral)	2046	7.92613e+06	0.000258133
Kyrgyz Republic	KGZ	Europe & Central Asia	Official bilateral	China	China (Official bilateral)	1778506	8.45462e+06	0.210359
Kyrgyz Republic	KGZ	Europe & Central Asia	Official multilateral	World Bank-IDA	World Bank-IDA (Official multilateral)	657031	8.45462e+06	0.0777127
Kyrgyz Republic	KGZ	Europe & Central Asia	Official multilateral	Asian Dev. Bank	Asian Dev. Bank (Official multilateral)	566464	8.45462e+06	0.0670005
Kyrgyz Republic	KGZ	Europe & Central Asia	Official multilateral	International Monetary Fund	International Monetary Fund (Official multilateral)	257513	8.45462e+06	0.0304583
Kyrgyz Republic	KGZ	Europe & Central Asia	Official bilateral	Japan	Japan (Official bilateral)	239205	8.45462e+06	0.0282928
Kyrgyz Republic	KGZ	Europe & Central Asia	Official bilateral	Turkey	Turkey (Official bilateral)	93269	8.45462e+06	0.0110317
Kyrgyz Republic	KGZ	Europe & Central Asia	Official bilateral	Germany	Germany (Official bilateral)	82280	8.45462e+06	0.00973196
Kyrgyz Republic	KGZ	Europe & Central Asia	Official bilateral	Saudi Arabia	Saudi Arabia (Official bilateral)	19480	8.45462e+06	0.00230407
Kyrgyz Republic	KGZ	Europe & Central Asia	Official bilateral	Kuwait	Kuwait (Official bilateral)	10457	8.45462e+06	0.00123684
Kyrgyz Republic	KGZ	Europe & Central Asia	Official bilateral	United Arab Emirates	United Arab Emirates (Official bilateral)	10108	8.45462e+06	0.00119556
Kyrgyz Republic	KGZ	Europe & Central Asia	Official bilateral	France	France (Official bilateral)	4704	8.45462e+06	0.000556382
Lao PDR	LAO	East Asia & Pacific	Official bilateral	China	China (Official bilateral)	5172147	1.81738e+07	0.284593
Lao PDR	LAO	East Asia & Pacific	Bondholders	Bond market	Bond market (Bondholders)	1671298	1.81738e+07	0.0919617
Lao PDR	LAO	East Asia & Pacific	Official multilateral	Asian Dev. Bank	Asian Dev. Bank (Official multilateral)	883304	1.81738e+07	0.048603
Lao PDR	LAO	East Asia & Pacific	Official bilateral	Thailand	Thailand (Official bilateral)	690198	1.81738e+07	0.0379776
Lao PDR	LAO	East Asia & Pacific	Official multilateral	World Bank-IDA	World Bank-IDA (Official multilateral)	658619	1.81738e+07	0.0362399
Lao PDR	LAO	East Asia & Pacific	Official bilateral	Japan	Japan (Official bilateral)	159685	1.81738e+07	0.00878653
Lao PDR	LAO	East Asia & Pacific	Non-official	Austria	Austria (Non-official)	133346	1.81738e+07	0.00733725
Lao PDR	LAO	East Asia & Pacific	Non-official	China	China (Non-official)	79846	1.81738e+07	0.00439346
Lao PDR	LAO	East Asia & Pacific	Official bilateral	Hungary	Hungary (Official bilateral)	75357	1.81738e+07	0.00414645
Lao PDR	LAO	East Asia & Pacific	Official bilateral	India	India (Official bilateral)	71738	1.81738e+07	0.00394732
Lao PDR	LAO	East Asia & Pacific	Official multilateral	International Monetary Fund	International Monetary Fund (Official multilateral)	70079	1.81738e+07	0.00385604
Lao PDR	LAO	East Asia & Pacific	Non-official	Japan	Japan (Non-official)	49625	1.81738e+07	0.00273057
Lao PDR	LAO	East Asia & Pacific	Official bilateral	Kuwait	Kuwait (Official bilateral)	18245	1.81738e+07	0.00100392
Lao PDR	LAO	East Asia & Pacific	Official bilateral	Sweden	Sweden (Official bilateral)	6124	1.81738e+07	0.000336968
Lesotho	LSO	Sub-Saharan Africa	Official multilateral	World Bank-IDA	World Bank-IDA (Official multilateral)	362837	2.37633e+06	0.152688
Lesotho	LSO	Sub-Saharan Africa	Official multilateral	African Dev. Bank	African Dev. Bank (Official multilateral)	166536	2.37633e+06	0.0700812
Lesotho	LSO	Sub-Saharan Africa	Official multilateral	International Monetary Fund	International Monetary Fund (Official multilateral)	79280	2.37633e+06	0.0333624
Lesotho	LSO	Sub-Saharan Africa	Official bilateral	China	China (Official bilateral)	71542	2.37633e+06	0.0301061
Lesotho	LSO	Sub-Saharan Africa	Official bilateral	Kuwait	Kuwait (Official bilateral)	22937	2.37633e+06	0.00965228
Lesotho	LSO	Sub-Saharan Africa	Official bilateral	Saudi Arabia	Saudi Arabia (Official bilateral)	19376	2.37633e+06	0.00815375
Lesotho	LSO	Sub-Saharan Africa	Official bilateral	United Arab Emirates	United Arab Emirates (Official bilateral)	13127	2.37633e+06	0.00552407
Lesotho	LSO	Sub-Saharan Africa	Official bilateral	India	India (Official bilateral)	3798	2.37633e+06	0.00159826
Lesotho	LSO	Sub-Saharan Africa	Non-official	France	France (Non-official)	2922	2.37633e+06	0.00122963
Lesotho	LSO	Sub-Saharan Africa	Official bilateral	France	France (Official bilateral)	876	2.37633e+06	0.000368636
Liberia	LBR	Sub-Saharan Africa	Official multilateral	World Bank-IDA	World Bank-IDA (Official multilateral)	454936	3.07052e+06	0.148163
Liberia	LBR	Sub-Saharan Africa	Official multilateral	International Monetary Fund	International Monetary Fund (Official multilateral)	396297	3.07052e+06	0.129065
Liberia	LBR	Sub-Saharan Africa	Official multilateral	African Dev. Bank	African Dev. Bank (Official multilateral)	132657	3.07052e+06	0.0432035
Liberia	LBR	Sub-Saharan Africa	Official bilateral	China	China (Official bilateral)	55261	3.07052e+06	0.0179973
Liberia	LBR	Sub-Saharan Africa	Official bilateral	Saudi Arabia	Saudi Arabia (Official bilateral)	44696	3.07052e+06	0.0145565
Liberia	LBR	Sub-Saharan Africa	Official bilateral	Kuwait	Kuwait (Official bilateral)	26279	3.07052e+06	0.00855849
Liberia	LBR	Sub-Saharan Africa	Official bilateral	India	India (Official bilateral)	1350	3.07052e+06	0.000439665
Madagascar	MDG	Sub-Saharan Africa	Official multilateral	World Bank-IDA	World Bank-IDA (Official multilateral)	1686384	1.41146e+07	0.119478
Madagascar	MDG	Sub-Saharan Africa	Official multilateral	International Monetary Fund	International Monetary Fund (Official multilateral)	545183	1.41146e+07	0.0386254
Madagascar	MDG	Sub-Saharan Africa	Official multilateral	African Dev. Bank	African Dev. Bank (Official multilateral)	438418	1.41146e+07	0.0310612
Madagascar	MDG	Sub-Saharan Africa	Official bilateral	China	China (Official bilateral)	135429	1.41146e+07	0.00959494
Madagascar	MDG	Sub-Saharan Africa	Non-official	Germany	Germany (Non-official)	88527	1.41146e+07	0.006272
Madagascar	MDG	Sub-Saharan Africa	Official bilateral	France	France (Official bilateral)	83702	1.41146e+07	0.00593016
Madagascar	MDG	Sub-Saharan Africa	Non-official	Ireland	Ireland (Non-official)	57435	1.41146e+07	0.00406918
Madagascar	MDG	Sub-Saharan Africa	Official bilateral	Japan	Japan (Official bilateral)	33477	1.41146e+07	0.00237179
Madagascar	MDG	Sub-Saharan Africa	Official bilateral	Kuwait	Kuwait (Official bilateral)	22010	1.41146e+07	0.00155937
Madagascar	MDG	Sub-Saharan Africa	Official bilateral	Saudi Arabia	Saudi Arabia (Official bilateral)	17187	1.41146e+07	0.00121767
Madagascar	MDG	Sub-Saharan Africa	Official bilateral	India	India (Official bilateral)	14516	1.41146e+07	0.00102844
Madagascar	MDG	Sub-Saharan Africa	Non-official	Netherlands	Netherlands (Non-official)	6158	1.41146e+07	0.000436285
Madagascar	MDG	Sub-Saharan Africa	Official bilateral	Spain	Spain (Official bilateral)	1746	1.41146e+07	0.000123701
Madagascar	MDG	Sub-Saharan Africa	Non-official	Bahamas	Bahamas (Non-official)	750	1.41146e+07	5.31364e-05
Madagascar	MDG	Sub-Saharan Africa	Non-official	France	France (Non-official)	684	1.41146e+07	4.84604e-05
Malawi	MWI	Sub-Saharan Africa	Official multilateral	World Bank-IDA	World Bank-IDA (Official multilateral)	969287	7.6667e+06	0.126428
Malawi	MWI	Sub-Saharan Africa	Official multilateral	African Dev. Bank	African Dev. Bank (Official multilateral)	361336	7.6667e+06	0.0471306
Malawi	MWI	Sub-Saharan Africa	Official multilateral	International Monetary Fund	International Monetary Fund (Official multilateral)	339457	7.6667e+06	0.0442768
Malawi	MWI	Sub-Saharan Africa	Official bilateral	China	China (Official bilateral)	205022	7.6667e+06	0.0267419
Malawi	MWI	Sub-Saharan Africa	Official bilateral	India	India (Official bilateral)	143069	7.6667e+06	0.0186611
Malawi	MWI	Sub-Saharan Africa	Official bilateral	Kuwait	Kuwait (Official bilateral)	44438	7.6667e+06	0.00579623
Malawi	MWI	Sub-Saharan Africa	Official bilateral	Saudi Arabia	Saudi Arabia (Official bilateral)	27141	7.6667e+06	0.00354011
Malawi	MWI	Sub-Saharan Africa	Official bilateral	United Arab Emirates	United Arab Emirates (Official bilateral)	4136	7.6667e+06	0.000539476
Malawi	MWI	Sub-Saharan Africa	Official bilateral	Belgium	Belgium (Official bilateral)	1347	7.6667e+06	0.000175695
Maldives	MDV	South Asia	Official bilateral	China	China (Official bilateral)	851299	5.64218e+06	0.150881
Maldives	MDV	South Asia	Non-official	China	China (Non-official)	314490	5.64218e+06	0.0557391
Maldives	MDV	South Asia	Official multilateral	World Bank-IDA	World Bank-IDA (Official multilateral)	92171	5.64218e+06	0.0163361
Maldives	MDV	South Asia	Official multilateral	Asian Dev. Bank	Asian Dev. Bank (Official multilateral)	79724	5.64218e+06	0.01413
Maldives	MDV	South Asia	Official bilateral	Saudi Arabia	Saudi Arabia (Official bilateral)	72623	5.64218e+06	0.0128714
Maldives	MDV	South Asia	Official bilateral	India	India (Official bilateral)	65782	5.64218e+06	0.011659
Maldives	MDV	South Asia	Non-official	Singapore	Singapore (Non-official)	65100	5.64218e+06	0.0115381
Maldives	MDV	South Asia	Official bilateral	Kuwait	Kuwait (Official bilateral)	27870	5.64218e+06	0.00493958
Maldives	MDV	South Asia	Non-official	Sri Lanka	Sri Lanka (Non-official)	24056	5.64218e+06	0.0042636
Maldives	MDV	South Asia	Official bilateral	Japan	Japan (Official bilateral)	20115	5.64218e+06	0.00356511
Maldives	MDV	South Asia	Bondholders	Bond market	Bond market (Bondholders)	19986	5.64218e+06	0.00354225
Maldives	MDV	South Asia	Official bilateral	France	France (Official bilateral)	13363	5.64218e+06	0.00236841
Maldives	MDV	South Asia	Official multilateral	International Monetary Fund	International Monetary Fund (Official multilateral)	10776	5.64218e+06	0.0019099
Maldives	MDV	South Asia	Non-official	Netherlands	Netherlands (Non-official)	8388	5.64218e+06	0.00148666
Maldives	MDV	South Asia	Official bilateral	United Arab Emirates	United Arab Emirates (Official bilateral)	8355	5.64218e+06	0.00148081
Maldives	MDV	South Asia	Official bilateral	Belgium	Belgium (Official bilateral)	2382	5.64218e+06	0.000422177
Maldives	MDV	South Asia	Official bilateral	United States	United States (Official bilateral)	580	5.64218e+06	0.000102797
Mali	MLI	Sub-Saharan Africa	Official multilateral	World Bank-IDA	World Bank-IDA (Official multilateral)	1969641	1.72796e+07	0.113987
Mali	MLI	Sub-Saharan Africa	Official multilateral	African Dev. Bank	African Dev. Bank (Official multilateral)	697226	1.72796e+07	0.0403497
Mali	MLI	Sub-Saharan Africa	Official bilateral	China	China (Official bilateral)	550744	1.72796e+07	0.0318726
Mali	MLI	Sub-Saharan Africa	Official multilateral	International Monetary Fund	International Monetary Fund (Official multilateral)	446740	1.72796e+07	0.0258537
Mali	MLI	Sub-Saharan Africa	Official bilateral	France	France (Official bilateral)	158597	1.72796e+07	0.0091783
Mali	MLI	Sub-Saharan Africa	Official bilateral	India	India (Official bilateral)	119766	1.72796e+07	0.00693108
Mali	MLI	Sub-Saharan Africa	Official bilateral	Saudi Arabia	Saudi Arabia (Official bilateral)	87182	1.72796e+07	0.00504538
Mali	MLI	Sub-Saharan Africa	Official bilateral	Kuwait	Kuwait (Official bilateral)	76607	1.72796e+07	0.00443339
Mali	MLI	Sub-Saharan Africa	Official bilateral	Libya	Libya (Official bilateral)	33766	1.72796e+07	0.0019541
Mali	MLI	Sub-Saharan Africa	Official bilateral	United Arab Emirates	United Arab Emirates (Official bilateral)	28039	1.72796e+07	0.00162267
Mali	MLI	Sub-Saharan Africa	Official bilateral	Austria	Austria (Official bilateral)	5617	1.72796e+07	0.000325066
Mali	MLI	Sub-Saharan Africa	Official bilateral	Belgium	Belgium (Official bilateral)	4125	1.72796e+07	0.000238721
Mali	MLI	Sub-Saharan Africa	Non-official	Netherlands	Netherlands (Non-official)	209	1.72796e+07	1.20952e-05
Mauritania	MRT	Sub-Saharan Africa	Official bilateral	Saudi Arabia	Saudi Arabia (Official bilateral)	610836	7.60066e+06	0.0803662
Mauritania	MRT	Sub-Saharan Africa	Official multilateral	World Bank-IDA	World Bank-IDA (Official multilateral)	387548	7.60066e+06	0.0509888
Mauritania	MRT	Sub-Saharan Africa	Official bilateral	China	China (Official bilateral)	322201	7.60066e+06	0.0423912
Mauritania	MRT	Sub-Saharan Africa	Official bilateral	Kuwait	Kuwait (Official bilateral)	269754	7.60066e+06	0.0354909
Mauritania	MRT	Sub-Saharan Africa	Official multilateral	International Monetary Fund	International Monetary Fund (Official multilateral)	244042	7.60066e+06	0.032108
Mauritania	MRT	Sub-Saharan Africa	Official multilateral	African Dev. Bank	African Dev. Bank (Official multilateral)	186886	7.60066e+06	0.0245881
Mauritania	MRT	Sub-Saharan Africa	Official bilateral	France	France (Official bilateral)	116489	7.60066e+06	0.0153262
Mauritania	MRT	Sub-Saharan Africa	Official bilateral	India	India (Official bilateral)	107379	7.60066e+06	0.0141276
Mauritania	MRT	Sub-Saharan Africa	Official bilateral	Germany	Germany (Official bilateral)	56441	7.60066e+06	0.00742581
Mauritania	MRT	Sub-Saharan Africa	Official bilateral	Libya	Libya (Official bilateral)	46611	7.60066e+06	0.0061325
Mauritania	MRT	Sub-Saharan Africa	Official bilateral	Brazil	Brazil (Official bilateral)	36447	7.60066e+06	0.00479524
Mauritania	MRT	Sub-Saharan Africa	Official bilateral	United Arab Emirates	United Arab Emirates (Official bilateral)	27826	7.60066e+06	0.003661
Mauritania	MRT	Sub-Saharan Africa	Official bilateral	Spain	Spain (Official bilateral)	21319	7.60066e+06	0.00280489
Moldova	MDA	Europe & Central Asia	Official multilateral	World Bank-IDA	World Bank-IDA (Official multilateral)	616773	1.19687e+07	0.0515321
Moldova	MDA	Europe & Central Asia	Official multilateral	International Monetary Fund	International Monetary Fund (Official multilateral)	457512	1.19687e+07	0.0382257
Moldova	MDA	Europe & Central Asia	Official multilateral	World Bank-IBRD	World Bank-IBRD (Official multilateral)	98839	1.19687e+07	0.00825811
Moldova	MDA	Europe & Central Asia	Official bilateral	Japan	Japan (Official bilateral)	58165	1.19687e+07	0.00485975
Moldova	MDA	Europe & Central Asia	Official bilateral	Russian Federation	Russian Federation (Official bilateral)	34395	1.19687e+07	0.00287374
Moldova	MDA	Europe & Central Asia	Official bilateral	United States	United States (Official bilateral)	25008	1.19687e+07	0.00208945
Moldova	MDA	Europe & Central Asia	Non-official	Austria	Austria (Non-official)	24052	1.19687e+07	0.00200957
Moldova	MDA	Europe & Central Asia	Official bilateral	Germany, Fed.Rep. Of	Germany, Fed.Rep. Of (Official bilateral)	14579	1.19687e+07	0.00121809
Moldova	MDA	Europe & Central Asia	Non-official	Slovenia	Slovenia (Non-official)	18	1.19687e+07	1.50392e-06
Mongolia	MNG	East Asia & Pacific	Bondholders	Bond market	Bond market (Bondholders)	3400000	1.39967e+07	0.242914
Mongolia	MNG	East Asia & Pacific	Official multilateral	Asian Dev. Bank	Asian Dev. Bank (Official multilateral)	1452027	1.39967e+07	0.103741
Mongolia	MNG	East Asia & Pacific	Official bilateral	Japan	Japan (Official bilateral)	1123847	1.39967e+07	0.0802936
Mongolia	MNG	East Asia & Pacific	Official bilateral	China	China (Official bilateral)	1054662	1.39967e+07	0.0753507
Mongolia	MNG	East Asia & Pacific	Official multilateral	World Bank-IDA	World Bank-IDA (Official multilateral)	578889	1.39967e+07	0.0413589
Mongolia	MNG	East Asia & Pacific	Official multilateral	International Monetary Fund	International Monetary Fund (Official multilateral)	284865	1.39967e+07	0.0203523
Mongolia	MNG	East Asia & Pacific	Non-official	Switzerland	Switzerland (Non-official)	156000	1.39967e+07	0.0111455
Mongolia	MNG	East Asia & Pacific	Official bilateral	Germany	Germany (Official bilateral)	76459	1.39967e+07	0.00546264
Mongolia	MNG	East Asia & Pacific	Non-official	Austria	Austria (Non-official)	49237	1.39967e+07	0.00351775
Mongolia	MNG	East Asia & Pacific	Official bilateral	Kuwait	Kuwait (Official bilateral)	28748	1.39967e+07	0.00205391
Mongolia	MNG	East Asia & Pacific	Official bilateral	India	India (Official bilateral)	27911	1.39967e+07	0.00199411
Mongolia	MNG	East Asia & Pacific	Official bilateral	France	France (Official bilateral)	10329	1.39967e+07	0.000737959
Mongolia	MNG	East Asia & Pacific	Non-official	France	France (Non-official)	5624	1.39967e+07	0.000401808
Mongolia	MNG	East Asia & Pacific	Official bilateral	Belgium	Belgium (Official bilateral)	4983	1.39967e+07	0.000356012
Mongolia	MNG	East Asia & Pacific	Official bilateral	Spain	Spain (Official bilateral)	4195	1.39967e+07	0.000299713
Mongolia	MNG	East Asia & Pacific	Official bilateral	Austria	Austria (Official bilateral)	3668	1.39967e+07	0.000262061
Mongolia	MNG	East Asia & Pacific	Official bilateral	United Arab Emirates	United Arab Emirates (Official bilateral)	3250	1.39967e+07	0.000232197
Mongolia	MNG	East Asia & Pacific	Official bilateral	Sweden	Sweden (Official bilateral)	905	1.39967e+07	6.4658e-05
Mongolia	MNG	East Asia & Pacific	Official multilateral	World Bank-IBRD	World Bank-IBRD (Official multilateral)	50	1.39967e+07	3.57227e-06
Mozambique	MOZ	Sub-Saharan Africa	Official multilateral	World Bank-IDA	World Bank-IDA (Official multilateral)	3039196	1.52914e+07	0.198751
Mozambique	MOZ	Sub-Saharan Africa	Official bilateral	China	China (Official bilateral)	1910117	1.52914e+07	0.124914
Mozambique	MOZ	Sub-Saharan Africa	Official multilateral	African Dev. Bank	African Dev. Bank (Official multilateral)	906088	1.52914e+07	0.0592546
Mozambique	MOZ	Sub-Saharan Africa	Bondholders	Bond market	Bond market (Bondholders)	726524	1.52914e+07	0.0475118
Mozambique	MOZ	Sub-Saharan Africa	Non-official	United Kingdom	United Kingdom (Non-official)	478100	1.52914e+07	0.0312658
Mozambique	MOZ	Sub-Saharan Africa	Official bilateral	Portugal	Portugal (Official bilateral)	453096	1.52914e+07	0.0296307
Mozambique	MOZ	Sub-Saharan Africa	Official bilateral	Brazil	Brazil (Official bilateral)	440215	1.52914e+07	0.0287883
Mozambique	MOZ	Sub-Saharan Africa	Official multilateral	International Monetary Fund	International Monetary Fund (Official multilateral)	375010	1.52914e+07	0.0245242
Mozambique	MOZ	Sub-Saharan Africa	Official bilateral	Japan	Japan (Official bilateral)	353556	1.52914e+07	0.0231212
Mozambique	MOZ	Sub-Saharan Africa	Official bilateral	Libya	Libya (Official bilateral)	313947	1.52914e+07	0.0205309
Mozambique	MOZ	Sub-Saharan Africa	Official bilateral	India	India (Official bilateral)	249313	1.52914e+07	0.0163041
Mozambique	MOZ	Sub-Saharan Africa	Official bilateral	France	France (Official bilateral)	231226	1.52914e+07	0.0151213
Mozambique	MOZ	Sub-Saharan Africa	Official bilateral	Russian Federation	Russian Federation (Official bilateral)	166421	1.52914e+07	0.0108833
Mozambique	MOZ	Sub-Saharan Africa	Non-official	Portugal	Portugal (Non-official)	121547	1.52914e+07	0.00794869
Mozambique	MOZ	Sub-Saharan Africa	Non-official	Denmark	Denmark (Non-official)	61406	1.52914e+07	0.00401571
Mozambique	MOZ	Sub-Saharan Africa	Official bilateral	Kuwait	Kuwait (Official bilateral)	57772	1.52914e+07	0.00377806
Mozambique	MOZ	Sub-Saharan Africa	Official bilateral	Saudi Arabia	Saudi Arabia (Official bilateral)	37376	1.52914e+07	0.00244424
Mozambique	MOZ	Sub-Saharan Africa	Official bilateral	Spain	Spain (Official bilateral)	24553	1.52914e+07	0.00160567
Mozambique	MOZ	Sub-Saharan Africa	Non-official	Austria	Austria (Non-official)	17862	1.52914e+07	0.0011681
Mozambique	MOZ	Sub-Saharan Africa	Non-official	Italy	Italy (Non-official)	8813	1.52914e+07	0.000576335
Myanmar	MMR	East Asia & Pacific	Official bilateral	China	China (Official bilateral)	3209976	7.60859e+07	0.0421889
Myanmar	MMR	East Asia & Pacific	Official bilateral	Japan	Japan (Official bilateral)	3108624	7.60859e+07	0.0408568
Myanmar	MMR	East Asia & Pacific	Official multilateral	World Bank-IDA	World Bank-IDA (Official multilateral)	1467678	7.60859e+07	0.0192898
Myanmar	MMR	East Asia & Pacific	Official bilateral	Germany	Germany (Official bilateral)	708601	7.60859e+07	0.00931318
Myanmar	MMR	East Asia & Pacific	Official multilateral	Asian Dev. Bank	Asian Dev. Bank (Official multilateral)	580681	7.60859e+07	0.00763192
Myanmar	MMR	East Asia & Pacific	Official bilateral	France	France (Official bilateral)	485193	7.60859e+07	0.00637691
Myanmar	MMR	East Asia & Pacific	Official multilateral	International Monetary Fund	International Monetary Fund (Official multilateral)	339842	7.60859e+07	0.00446656
Myanmar	MMR	East Asia & Pacific	Official bilateral	India	India (Official bilateral)	208894	7.60859e+07	0.0027455
Myanmar	MMR	East Asia & Pacific	Official bilateral	Thailand	Thailand (Official bilateral)	138808	7.60859e+07	0.00182436
Myanmar	MMR	East Asia & Pacific	Non-official	China	China (Non-official)	131684	7.60859e+07	0.00173073
Myanmar	MMR	East Asia & Pacific	Official bilateral	Austria	Austria (Official bilateral)	131106	7.60859e+07	0.00172313
Myanmar	MMR	East Asia & Pacific	Non-official	Serbia	Serbia (Non-official)	57393	7.60859e+07	0.000754319
Myanmar	MMR	East Asia & Pacific	Official bilateral	United Kingdom	United Kingdom (Official bilateral)	35664	7.60859e+07	0.000468734
Myanmar	MMR	East Asia & Pacific	Non-official	Korea, Republic Of	Korea, Republic Of (Non-official)	34707	7.60859e+07	0.000456156
Myanmar	MMR	East Asia & Pacific	Non-official	Singapore	Singapore (Non-official)	27540	7.60859e+07	0.00036196
Myanmar	MMR	East Asia & Pacific	Non-official	Thailand	Thailand (Non-official)	17441	7.60859e+07	0.000229228
Myanmar	MMR	East Asia & Pacific	Official bilateral	Netherlands	Netherlands (Official bilateral)	8677	7.60859e+07	0.000114042
Myanmar	MMR	East Asia & Pacific	Non-official	Sweden	Sweden (Non-official)	8571	7.60859e+07	0.000112649
Myanmar	MMR	East Asia & Pacific	Official bilateral	Italy	Italy (Official bilateral)	7414	7.60859e+07	9.74426e-05
Myanmar	MMR	East Asia & Pacific	Non-official	Israel	Israel (Non-official)	7142	7.60859e+07	9.38676e-05
Myanmar	MMR	East Asia & Pacific	Official bilateral	Saudi Arabia	Saudi Arabia (Official bilateral)	930	7.60859e+07	1.2223e-05
Myanmar	MMR	East Asia & Pacific	Non-official	France	France (Non-official)	532	7.60859e+07	6.9921e-06
Nepal	NPL	South Asia	Official multilateral	World Bank-IDA	World Bank-IDA (Official multilateral)	2877236	3.06414e+07	0.0939003
Nepal	NPL	South Asia	Official multilateral	Asian Dev. Bank	Asian Dev. Bank (Official multilateral)	1998826	3.06414e+07	0.0652329
Nepal	NPL	South Asia	Official bilateral	Japan	Japan (Official bilateral)	284375	3.06414e+07	0.00928075
Nepal	NPL	South Asia	Official bilateral	China	China (Official bilateral)	214866	3.06414e+07	0.00701228
Nepal	NPL	South Asia	Official bilateral	India	India (Official bilateral)	187844	3.06414e+07	0.0061304
Nepal	NPL	South Asia	Official multilateral	International Monetary Fund	International Monetary Fund (Official multilateral)	147412	3.06414e+07	0.00481088
Nepal	NPL	South Asia	Official bilateral	Saudi Arabia	Saudi Arabia (Official bilateral)	7179	3.06414e+07	0.000234291
Nepal	NPL	South Asia	Official bilateral	Belgium	Belgium (Official bilateral)	6112	3.06414e+07	0.000199469
Nepal	NPL	South Asia	Official bilateral	Kuwait	Kuwait (Official bilateral)	5365	3.06414e+07	0.00017509
Nepal	NPL	South Asia	Official bilateral	France	France (Official bilateral)	2611	3.06414e+07	8.52116e-05
Nepal	NPL	South Asia	Official bilateral	Austria	Austria (Official bilateral)	154	3.06414e+07	5.02588e-06
Nepal	NPL	South Asia	Non-official	France	France (Non-official)	46	3.06414e+07	1.50124e-06
Nicaragua	NIC	Latin America & Caribbean	Official multilateral	Inter-American Dev. Bank	Inter-American Dev. Bank (Official multilateral)	2088540	1.25209e+07	0.166804
Nicaragua	NIC	Latin America & Caribbean	Official multilateral	World Bank-IDA	World Bank-IDA (Official multilateral)	692201	1.25209e+07	0.0552836
Nicaragua	NIC	Latin America & Caribbean	Official bilateral	Spain	Spain (Official bilateral)	223241	1.25209e+07	0.0178294
Nicaragua	NIC	Latin America & Caribbean	Official multilateral	International Monetary Fund	International Monetary Fund (Official multilateral)	181134	1.25209e+07	0.0144665
Nicaragua	NIC	Latin America & Caribbean	Official bilateral	Libya	Libya (Official bilateral)	101738	1.25209e+07	0.00812544
Nicaragua	NIC	Latin America & Caribbean	Official bilateral	Iran, Islamic Republic Of	Iran, Islamic Republic Of (Official bilateral)	49986	1.25209e+07	0.0039922
Nicaragua	NIC	Latin America & Caribbean	Official bilateral	Germany, Fed.Rep. Of	Germany, Fed.Rep. Of (Official bilateral)	34265	1.25209e+07	0.00273662
Nicaragua	NIC	Latin America & Caribbean	Official bilateral	China	China (Official bilateral)	19301	1.25209e+07	0.0015415
Nicaragua	NIC	Latin America & Caribbean	Official bilateral	India	India (Official bilateral)	17375	1.25209e+07	0.00138768
Nicaragua	NIC	Latin America & Caribbean	Non-official	Austria	Austria (Non-official)	17121	1.25209e+07	0.00136739
Nicaragua	NIC	Latin America & Caribbean	Official bilateral	Japan	Japan (Official bilateral)	15478	1.25209e+07	0.00123617
Nicaragua	NIC	Latin America & Caribbean	Official bilateral	Italy	Italy (Official bilateral)	11511	1.25209e+07	0.000919342
Nicaragua	NIC	Latin America & Caribbean	Non-official	Netherlands	Netherlands (Non-official)	7878	1.25209e+07	0.000629187
Nicaragua	NIC	Latin America & Caribbean	Official bilateral	Kuwait	Kuwait (Official bilateral)	3029	1.25209e+07	0.000241915
Nicaragua	NIC	Latin America & Caribbean	Non-official	Belgium	Belgium (Non-official)	741	1.25209e+07	5.9181e-05
Nicaragua	NIC	Latin America & Caribbean	Official bilateral	France	France (Official bilateral)	273	1.25209e+07	2.18035e-05
Nicaragua	NIC	Latin America & Caribbean	Official bilateral	Hungary	Hungary (Official bilateral)	77	1.25209e+07	6.14971e-06
Niger	NER	Sub-Saharan Africa	Official multilateral	World Bank-IDA	World Bank-IDA (Official multilateral)	1346786	1.29117e+07	0.104307
Niger	NER	Sub-Saharan Africa	Official multilateral	International Monetary Fund	International Monetary Fund (Official multilateral)	345668	1.29117e+07	0.0267717
Niger	NER	Sub-Saharan Africa	Official bilateral	China	China (Official bilateral)	335073	1.29117e+07	0.0259511
Niger	NER	Sub-Saharan Africa	Official multilateral	African Dev. Bank	African Dev. Bank (Official multilateral)	328486	1.29117e+07	0.025441
Niger	NER	Sub-Saharan Africa	Official bilateral	France	France (Official bilateral)	110195	1.29117e+07	0.00853451
Niger	NER	Sub-Saharan Africa	Official bilateral	Saudi Arabia	Saudi Arabia (Official bilateral)	67385	1.29117e+07	0.00521891
Niger	NER	Sub-Saharan Africa	Official bilateral	India	India (Official bilateral)	65187	1.29117e+07	0.00504868
Niger	NER	Sub-Saharan Africa	Official bilateral	Kuwait	Kuwait (Official bilateral)	36793	1.29117e+07	0.00284959
Niger	NER	Sub-Saharan Africa	Official bilateral	Libya	Libya (Official bilateral)	16000	1.29117e+07	0.00123919
Niger	NER	Sub-Saharan Africa	Official bilateral	United Arab Emirates	United Arab Emirates (Official bilateral)	5571	1.29117e+07	0.000431469
Nigeria	NGA	Sub-Saharan Africa	Bondholders	Bond market	Bond market (Bondholders)	11168352	4.4812e+08	0.0249227
Nigeria	NGA	Sub-Saharan Africa	Official multilateral	World Bank-IDA	World Bank-IDA (Official multilateral)	9549703	4.4812e+08	0.0213106
Nigeria	NGA	Sub-Saharan Africa	Official bilateral	China	China (Official bilateral)	3175120	4.4812e+08	0.00708542
Nigeria	NGA	Sub-Saharan Africa	Official multilateral	International Monetary Fund	International Monetary Fund (Official multilateral)	2316751	4.4812e+08	0.00516993
[truncated: 267 more rows]

## Sheet: Sheet2
Debtor	Code	Region	Creditor Type	Creditor	Creditor-new	Debt Oustanding (th $)	GDP in 2019	Debt to GDP
[truncated: 1,064 more rows]

[truncated: 3 more sheets: Sheet3, sheet4-pivot, Sheet4]
